# Supplementary material for: Cortical Thickness Differences Are Associated With Chemical Synaptic Transmission Upregulated Genes in Degeneration of Mild Cognitive Impairment
Source: Front Aging Neurosci. 2021 Oct 29;13:745381. doi: 10.3389/fnagi.2021.745381 (PMC8585991; doi:10.3389/fnagi.2021.745381)
Supplement: Supplementary file 4 [file Table_2.xlsx]

## Sheet: MCI_S VS. MCI_AD (PLSR)
GroupID	Category	Term	Description	LogP	Log(q-value)	InTerm_InList	Genes	Symbols
1_Summary	GO Biological Processes	GO:0007268	chemical synaptic transmission	-24.1304	-20.0725	100/684	320,348,477,590,613,794,1325,1607,1630,1740,1813,1837,1960,1979,2054,2534,2555,2556,2558,2560,2562,2565,2742,2890,2897,2898,2904,2905,2915,2918,3350,3358,3360,4204,4218,4544,4885,4915,4983,5021,5173,5579,5582,5594,5649,5728,5786,5802,6506,6507,6509,6623,6854,7101,7143,8001,8447,8773,8831,8927,9066,9162,9256,9342,9362,9379,9495,9899,10675,10814,11170,22829,22941,22986,22999,23025,23413,26059,27115…	APBA1,APOE,ATP1A2,BCHE,BCR,CALB2,CORT,DGKB,DCC,DLG2,DRD2,DTNA,EGR3,EIF4EBP2,STX2,FYN,GABRA2,GABRA3,GABRA5,GABRB1,GABRB3,GABRG1,GLRA2,GRIA1,GRIK1,GRIK2,GRIN2B,GRIN2C,GRM5,GRM8,HTR1A,HTR2C,HTR4,MECP2,RAB8A,MTNR1B,NPTX2,NTRK2,OPHN1,OXTR,PDYN,PRKCB,PRKCG,MAPK1,RELN,PTEN,PTPRA,PTPRS,SLC1A2,SLC1A3,SLC1A4,SNCG,SYN2,NR2E1,TNR,GLRA3,DOC2B,SNAP23,SYNGAP1,BSN,SYT7,DGKI,TSPOAP1,SNAP29,CPNE6,NRXN2,AKAP5,SV2B,…
1_Member	GO Biological Processes	GO:0007268	chemical synaptic transmission	-24.1304	-20.0725	100/684	320,348,477,590,613,794,1325,1607,1630,1740,1813,1837,1960,1979,2054,2534,2555,2556,2558,2560,2562,2565,2742,2890,2897,2898,2904,2905,2915,2918,3350,3358,3360,4204,4218,4544,4885,4915,4983,5021,5173,5579,5582,5594,5649,5728,5786,5802,6506,6507,6509,6623,6854,7101,7143,8001,8447,8773,8831,8927,9066,9162,9256,9342,9362,9379,9495,9899,10675,10814,11170,22829,22941,22986,22999,23025,23413,26059,27115…	APBA1,APOE,ATP1A2,BCHE,BCR,CALB2,CORT,DGKB,DCC,DLG2,DRD2,DTNA,EGR3,EIF4EBP2,STX2,FYN,GABRA2,GABRA3,GABRA5,GABRB1,GABRB3,GABRG1,GLRA2,GRIA1,GRIK1,GRIK2,GRIN2B,GRIN2C,GRM5,GRM8,HTR1A,HTR2C,HTR4,MECP2,RAB8A,MTNR1B,NPTX2,NTRK2,OPHN1,OXTR,PDYN,PRKCB,PRKCG,MAPK1,RELN,PTEN,PTPRA,PTPRS,SLC1A2,SLC1A3,SLC1A4,SNCG,SYN2,NR2E1,TNR,GLRA3,DOC2B,SNAP23,SYNGAP1,BSN,SYT7,DGKI,TSPOAP1,SNAP29,CPNE6,NRXN2,AKAP5,SV2B,…
1_Member	GO Biological Processes	GO:0098916	anterograde trans-synaptic signaling	-24.1304	-20.0725	100/684	320,348,477,590,613,794,1325,1607,1630,1740,1813,1837,1960,1979,2054,2534,2555,2556,2558,2560,2562,2565,2742,2890,2897,2898,2904,2905,2915,2918,3350,3358,3360,4204,4218,4544,4885,4915,4983,5021,5173,5579,5582,5594,5649,5728,5786,5802,6506,6507,6509,6623,6854,7101,7143,8001,8447,8773,8831,8927,9066,9162,9256,9342,9362,9379,9495,9899,10675,10814,11170,22829,22941,22986,22999,23025,23413,26059,27115…	APBA1,APOE,ATP1A2,BCHE,BCR,CALB2,CORT,DGKB,DCC,DLG2,DRD2,DTNA,EGR3,EIF4EBP2,STX2,FYN,GABRA2,GABRA3,GABRA5,GABRB1,GABRB3,GABRG1,GLRA2,GRIA1,GRIK1,GRIK2,GRIN2B,GRIN2C,GRM5,GRM8,HTR1A,HTR2C,HTR4,MECP2,RAB8A,MTNR1B,NPTX2,NTRK2,OPHN1,OXTR,PDYN,PRKCB,PRKCG,MAPK1,RELN,PTEN,PTPRA,PTPRS,SLC1A2,SLC1A3,SLC1A4,SNCG,SYN2,NR2E1,TNR,GLRA3,DOC2B,SNAP23,SYNGAP1,BSN,SYT7,DGKI,TSPOAP1,SNAP29,CPNE6,NRXN2,AKAP5,SV2B,…
1_Member	GO Biological Processes	GO:0099536	synaptic signaling	-23.9214	-20.0396	101/700	320,348,477,590,613,794,1325,1607,1630,1740,1813,1837,1960,1979,2054,2534,2555,2556,2558,2560,2562,2565,2742,2890,2897,2898,2904,2905,2915,2918,3350,3358,3360,4204,4218,4544,4885,4915,4983,5021,5173,5579,5582,5594,5649,5728,5786,5802,6506,6507,6509,6623,6854,7101,7143,8001,8447,8773,8831,8927,9066,9162,9256,9342,9362,9379,9495,9899,10675,10814,11170,22829,22941,22986,22999,23025,23413,26059,27115…	APBA1,APOE,ATP1A2,BCHE,BCR,CALB2,CORT,DGKB,DCC,DLG2,DRD2,DTNA,EGR3,EIF4EBP2,STX2,FYN,GABRA2,GABRA3,GABRA5,GABRB1,GABRB3,GABRG1,GLRA2,GRIA1,GRIK1,GRIK2,GRIN2B,GRIN2C,GRM5,GRM8,HTR1A,HTR2C,HTR4,MECP2,RAB8A,MTNR1B,NPTX2,NTRK2,OPHN1,OXTR,PDYN,PRKCB,PRKCG,MAPK1,RELN,PTEN,PTPRA,PTPRS,SLC1A2,SLC1A3,SLC1A4,SNCG,SYN2,NR2E1,TNR,GLRA3,DOC2B,SNAP23,SYNGAP1,BSN,SYT7,DGKI,TSPOAP1,SNAP29,CPNE6,NRXN2,AKAP5,SV2B,…
1_Member	GO Biological Processes	GO:0099537	trans-synaptic signaling	-23.7863	-20.0295	100/691	320,348,477,590,613,794,1325,1607,1630,1740,1813,1837,1960,1979,2054,2534,2555,2556,2558,2560,2562,2565,2742,2890,2897,2898,2904,2905,2915,2918,3350,3358,3360,4204,4218,4544,4885,4915,4983,5021,5173,5579,5582,5594,5649,5728,5786,5802,6506,6507,6509,6623,6854,7101,7143,8001,8447,8773,8831,8927,9066,9162,9256,9342,9362,9379,9495,9899,10675,10814,11170,22829,22941,22986,22999,23025,23413,26059,27115…	APBA1,APOE,ATP1A2,BCHE,BCR,CALB2,CORT,DGKB,DCC,DLG2,DRD2,DTNA,EGR3,EIF4EBP2,STX2,FYN,GABRA2,GABRA3,GABRA5,GABRB1,GABRB3,GABRG1,GLRA2,GRIA1,GRIK1,GRIK2,GRIN2B,GRIN2C,GRM5,GRM8,HTR1A,HTR2C,HTR4,MECP2,RAB8A,MTNR1B,NPTX2,NTRK2,OPHN1,OXTR,PDYN,PRKCB,PRKCG,MAPK1,RELN,PTEN,PTPRA,PTPRS,SLC1A2,SLC1A3,SLC1A4,SNCG,SYN2,NR2E1,TNR,GLRA3,DOC2B,SNAP23,SYNGAP1,BSN,SYT7,DGKI,TSPOAP1,SNAP29,CPNE6,NRXN2,AKAP5,SV2B,…
1_Member	GO Biological Processes	GO:0050804	modulation of chemical synaptic transmission	-14.278	-11.0652	60/418	320,348,477,590,613,794,1607,1630,1813,1979,2534,2890,2897,2898,2904,2905,2915,2918,4204,4218,4885,4915,4983,5021,5579,5582,5594,5649,5728,5786,5802,6623,7101,7143,8831,9066,9162,9495,10675,10814,11170,22829,22941,22986,22999,23025,23413,54434,56853,57338,57502,57596,64854,84687,114781,127262,143425,347733,388336,594855	APBA1,APOE,ATP1A2,BCHE,BCR,CALB2,DGKB,DCC,DRD2,EIF4EBP2,FYN,GRIA1,GRIK1,GRIK2,GRIN2B,GRIN2C,GRM5,GRM8,MECP2,RAB8A,NPTX2,NTRK2,OPHN1,OXTR,PRKCB,PRKCG,MAPK1,RELN,PTEN,PTPRA,PTPRS,SNCG,NR2E1,TNR,SYNGAP1,SYT7,DGKI,AKAP5,CSPG5,CPLX2,FAM107A,NLGN4Y,SHANK2,SORCS3,RIMS1,UNC13A,NCS1,SSH1,CELF4,JPH3,NLGN4X,BEGAIN,USP46,PPP1R9B,BTBD9,TPRG1L,SYT9,TUBB2B,SHISA6,CPLX3
1_Member	GO Biological Processes	GO:0099177	regulation of trans-synaptic signaling	-14.2302	-11.0474	60/419	320,348,477,590,613,794,1607,1630,1813,1979,2534,2890,2897,2898,2904,2905,2915,2918,4204,4218,4885,4915,4983,5021,5579,5582,5594,5649,5728,5786,5802,6623,7101,7143,8831,9066,9162,9495,10675,10814,11170,22829,22941,22986,22999,23025,23413,54434,56853,57338,57502,57596,64854,84687,114781,127262,143425,347733,388336,594855	APBA1,APOE,ATP1A2,BCHE,BCR,CALB2,DGKB,DCC,DRD2,EIF4EBP2,FYN,GRIA1,GRIK1,GRIK2,GRIN2B,GRIN2C,GRM5,GRM8,MECP2,RAB8A,NPTX2,NTRK2,OPHN1,OXTR,PRKCB,PRKCG,MAPK1,RELN,PTEN,PTPRA,PTPRS,SNCG,NR2E1,TNR,SYNGAP1,SYT7,DGKI,AKAP5,CSPG5,CPLX2,FAM107A,NLGN4Y,SHANK2,SORCS3,RIMS1,UNC13A,NCS1,SSH1,CELF4,JPH3,NLGN4X,BEGAIN,USP46,PPP1R9B,BTBD9,TPRG1L,SYT9,TUBB2B,SHISA6,CPLX3
1_Member	GO Biological Processes	GO:0007611	learning or memory	-9.62403	-6.78363	36/235	348,477,590,814,1813,1979,2334,2534,2558,2890,2904,2915,3678,4204,4763,4885,4915,5021,5582,5594,5728,5803,6517,7143,8831,9379,22829,22941,22986,57338,57502,80823,84687,90410,114781,139411	APOE,ATP1A2,BCHE,CAMK4,DRD2,EIF4EBP2,AFF2,FYN,GABRA5,GRIA1,GRIN2B,GRM5,ITGA5,MECP2,NF1,NPTX2,NTRK2,OXTR,PRKCG,MAPK1,PTEN,PTPRZ1,SLC2A4,TNR,SYNGAP1,NRXN2,NLGN4Y,SHANK2,SORCS3,JPH3,NLGN4X,BHLHB9,PPP1R9B,IFT20,BTBD9,PTCHD1
1_Member	GO Biological Processes	GO:0007610	behavior	-9.38591	-6.55848	60/544	238,320,348,460,477,482,590,596,814,1374,1813,1979,2334,2534,2558,2697,2737,2775,2890,2898,2904,2915,3350,3358,3678,4204,4544,4763,4885,4886,4915,5021,5457,5582,5594,5649,5728,5803,6517,6623,7068,7101,7143,8831,9379,22829,22941,22986,23230,57338,57502,64854,80243,80823,84623,84687,90410,114781,139411,285382	ALK,APBA1,APOE,ASTN1,ATP1A2,ATP1B2,BCHE,BCL2,CAMK4,CPT1A,DRD2,EIF4EBP2,AFF2,FYN,GABRA5,GJA1,GLI3,GNAO1,GRIA1,GRIK2,GRIN2B,GRM5,HTR1A,HTR2C,ITGA5,MECP2,MTNR1B,NF1,NPTX2,NPY1R,NTRK2,OXTR,POU4F1,PRKCG,MAPK1,RELN,PTEN,PTPRZ1,SLC2A4,SNCG,THRB,NR2E1,TNR,SYNGAP1,NRXN2,NLGN4Y,SHANK2,SORCS3,VPS13A,JPH3,NLGN4X,USP46,PREX2,BHLHB9,KIRREL3,PPP1R9B,IFT20,BTBD9,PTCHD1,C3orf70
1_Member	GO Biological Processes	GO:0050890	cognition	-8.76114	-5.97043	38/276	348,477,590,814,1813,1979,2334,2534,2558,2890,2904,2915,3678,4204,4763,4885,4915,5021,5582,5594,5728,5803,6509,6517,7143,8831,9379,11170,22829,22941,22986,57338,57502,80823,84687,90410,114781,139411	APOE,ATP1A2,BCHE,CAMK4,DRD2,EIF4EBP2,AFF2,FYN,GABRA5,GRIA1,GRIN2B,GRM5,ITGA5,MECP2,NF1,NPTX2,NTRK2,OXTR,PRKCG,MAPK1,PTEN,PTPRZ1,SLC1A4,SLC2A4,TNR,SYNGAP1,NRXN2,FAM107A,NLGN4Y,SHANK2,SORCS3,JPH3,NLGN4X,BHLHB9,PPP1R9B,IFT20,BTBD9,PTCHD1
1_Member	GO Biological Processes	GO:0007612	learning	-5.67567	-3.41714	20/130	477,590,1813,2534,2558,2915,4204,4763,4885,4915,7143,8831,9379,22829,22941,22986,57338,57502,84687,90410	ATP1A2,BCHE,DRD2,FYN,GABRA5,GRM5,MECP2,NF1,NPTX2,NTRK2,TNR,SYNGAP1,NRXN2,NLGN4Y,SHANK2,SORCS3,JPH3,NLGN4X,PPP1R9B,IFT20
1_Member	GO Biological Processes	GO:0008306	associative learning	-2.4135	-0.990101	9/68	477,1813,2558,4204,4763,4885,7143,8831,90410	ATP1A2,DRD2,GABRA5,MECP2,NF1,NPTX2,TNR,SYNGAP1,IFT20
2_Summary	GO Biological Processes	GO:0032990	cell part morphogenesis	-20.435	-16.775	93/679	214,348,596,658,1002,1501,1630,1813,1948,2534,2637,2697,2737,2887,2909,3326,3730,4038,4133,4218,4684,4781,4853,4915,4983,5058,5076,5361,5457,5594,5649,5728,5747,5786,5802,5819,5911,6091,6092,6383,6585,6586,6711,7101,7143,7204,7225,7422,7430,8609,8660,8831,8904,9334,9362,10152,10154,10611,10675,22941,22999,23022,23025,23026,23043,23189,26053,30011,50488,51199,51760,53358,55022,55364,55558,55740,56…	ALCAM,APOE,BCL2,BMPR1B,CDH4,CTNND2,DCC,DRD2,EFNB2,FYN,GBX2,GJA1,GLI3,GRB10,ARHGAP35,HSP90AB1,ANOS1,LRP4,MAP2,RAB8A,NCAM1,NFIB,NOTCH2,NTRK2,OPHN1,PAK1,PAX2,PLXNA1,POU4F1,MAPK1,RELN,PTEN,PTK2,PTPRA,PTPRS,NECTIN2,RAP2A,ROBO1,ROBO2,SDC2,SLIT1,SLIT3,SPTBN1,NR2E1,TNR,TRIO,TRPC6,VEGFA,EZR,KLF7,IRS2,SYNGAP1,CPNE1,B4GALT5,CPNE6,ABI2,PLXNC1,PDLIM5,CSPG5,SHANK2,RIMS1,PALLD,UNC13A,MYO16,TNIK,KANK1,AUTS2,SH3K…
2_Member	GO Biological Processes	GO:0032990	cell part morphogenesis	-20.435	-16.775	93/679	214,348,596,658,1002,1501,1630,1813,1948,2534,2637,2697,2737,2887,2909,3326,3730,4038,4133,4218,4684,4781,4853,4915,4983,5058,5076,5361,5457,5594,5649,5728,5747,5786,5802,5819,5911,6091,6092,6383,6585,6586,6711,7101,7143,7204,7225,7422,7430,8609,8660,8831,8904,9334,9362,10152,10154,10611,10675,22941,22999,23022,23025,23026,23043,23189,26053,30011,50488,51199,51760,53358,55022,55364,55558,55740,56…	ALCAM,APOE,BCL2,BMPR1B,CDH4,CTNND2,DCC,DRD2,EFNB2,FYN,GBX2,GJA1,GLI3,GRB10,ARHGAP35,HSP90AB1,ANOS1,LRP4,MAP2,RAB8A,NCAM1,NFIB,NOTCH2,NTRK2,OPHN1,PAK1,PAX2,PLXNA1,POU4F1,MAPK1,RELN,PTEN,PTK2,PTPRA,PTPRS,NECTIN2,RAP2A,ROBO1,ROBO2,SDC2,SLIT1,SLIT3,SPTBN1,NR2E1,TNR,TRIO,TRPC6,VEGFA,EZR,KLF7,IRS2,SYNGAP1,CPNE1,B4GALT5,CPNE6,ABI2,PLXNC1,PDLIM5,CSPG5,SHANK2,RIMS1,PALLD,UNC13A,MYO16,TNIK,KANK1,AUTS2,SH3K…
2_Member	GO Biological Processes	GO:0048858	cell projection morphogenesis	-20.064	-16.4833	91/663	214,348,596,658,1002,1501,1630,1813,1948,2534,2637,2697,2737,2887,2909,3326,3730,4038,4133,4218,4684,4781,4853,4915,4983,5058,5076,5361,5457,5594,5649,5728,5747,5786,5802,5911,6091,6092,6383,6585,6586,6711,7101,7143,7204,7225,7422,7430,8609,8660,8831,8904,9334,9362,10152,10154,10611,10675,22941,22999,23022,23025,23026,23043,23189,26053,30011,50488,51199,51760,53358,55364,55558,55740,56288,57154,5…	ALCAM,APOE,BCL2,BMPR1B,CDH4,CTNND2,DCC,DRD2,EFNB2,FYN,GBX2,GJA1,GLI3,GRB10,ARHGAP35,HSP90AB1,ANOS1,LRP4,MAP2,RAB8A,NCAM1,NFIB,NOTCH2,NTRK2,OPHN1,PAK1,PAX2,PLXNA1,POU4F1,MAPK1,RELN,PTEN,PTK2,PTPRA,PTPRS,RAP2A,ROBO1,ROBO2,SDC2,SLIT1,SLIT3,SPTBN1,NR2E1,TNR,TRIO,TRPC6,VEGFA,EZR,KLF7,IRS2,SYNGAP1,CPNE1,B4GALT5,CPNE6,ABI2,PLXNC1,PDLIM5,CSPG5,SHANK2,RIMS1,PALLD,UNC13A,MYO16,TNIK,KANK1,AUTS2,SH3KBP1,MINK…
2_Member	GO Biological Processes	GO:0048812	neuron projection morphogenesis	-19.7841	-16.2703	89/645	214,348,596,658,1002,1501,1630,1813,1948,2534,2637,2697,2737,2887,2909,3326,3730,4038,4133,4218,4684,4781,4853,4915,4983,5058,5076,5361,5457,5594,5649,5728,5747,5786,5802,5911,6091,6092,6383,6585,6586,6711,7101,7143,7204,7225,7422,7430,8609,8660,8831,8904,9334,9362,10152,10154,10611,22941,22999,23022,23025,23026,23043,26053,30011,50488,51199,51760,53358,55364,55558,55740,56288,57154,57498,80243,8…	ALCAM,APOE,BCL2,BMPR1B,CDH4,CTNND2,DCC,DRD2,EFNB2,FYN,GBX2,GJA1,GLI3,GRB10,ARHGAP35,HSP90AB1,ANOS1,LRP4,MAP2,RAB8A,NCAM1,NFIB,NOTCH2,NTRK2,OPHN1,PAK1,PAX2,PLXNA1,POU4F1,MAPK1,RELN,PTEN,PTK2,PTPRA,PTPRS,RAP2A,ROBO1,ROBO2,SDC2,SLIT1,SLIT3,SPTBN1,NR2E1,TNR,TRIO,TRPC6,VEGFA,EZR,KLF7,IRS2,SYNGAP1,CPNE1,B4GALT5,CPNE6,ABI2,PLXNC1,PDLIM5,SHANK2,RIMS1,PALLD,UNC13A,MYO16,TNIK,AUTS2,SH3KBP1,MINK1,NIN,SYT17,…
2_Member	GO Biological Processes	GO:0120039	plasma membrane bounded cell projection morphogenesis	-19.6998	-16.244	90/659	214,348,596,658,1002,1501,1630,1813,1948,2534,2637,2697,2737,2887,2909,3326,3730,4038,4133,4218,4684,4781,4853,4915,4983,5058,5076,5361,5457,5594,5649,5728,5747,5786,5802,5911,6091,6092,6383,6585,6586,6711,7101,7143,7204,7225,7422,7430,8609,8660,8831,8904,9334,9362,10152,10154,10611,22941,22999,23022,23025,23026,23043,23189,26053,30011,50488,51199,51760,53358,55364,55558,55740,56288,57154,57498,8…	ALCAM,APOE,BCL2,BMPR1B,CDH4,CTNND2,DCC,DRD2,EFNB2,FYN,GBX2,GJA1,GLI3,GRB10,ARHGAP35,HSP90AB1,ANOS1,LRP4,MAP2,RAB8A,NCAM1,NFIB,NOTCH2,NTRK2,OPHN1,PAK1,PAX2,PLXNA1,POU4F1,MAPK1,RELN,PTEN,PTK2,PTPRA,PTPRS,RAP2A,ROBO1,ROBO2,SDC2,SLIT1,SLIT3,SPTBN1,NR2E1,TNR,TRIO,TRPC6,VEGFA,EZR,KLF7,IRS2,SYNGAP1,CPNE1,B4GALT5,CPNE6,ABI2,PLXNC1,PDLIM5,SHANK2,RIMS1,PALLD,UNC13A,MYO16,TNIK,KANK1,AUTS2,SH3KBP1,MINK1,NIN,…
2_Member	GO Biological Processes	GO:0048667	cell morphogenesis involved in neuron differentiation	-17.8556	-14.4509	80/579	214,348,596,658,1002,1501,1630,1813,1948,2534,2637,2737,2887,2909,3326,3730,4038,4133,4218,4684,4781,4853,4915,4983,5058,5076,5361,5457,5594,5649,5728,5747,5786,5802,5911,6091,6092,6383,6585,6586,6711,7101,7143,7204,7225,7422,7430,8609,8660,8831,9334,9750,10152,10154,10611,22941,23022,23043,26053,30011,50488,51199,53358,55558,55740,56288,57498,80243,80823,84631,84894,85440,89884,150465,220164,221…	ALCAM,APOE,BCL2,BMPR1B,CDH4,CTNND2,DCC,DRD2,EFNB2,FYN,GBX2,GLI3,GRB10,ARHGAP35,HSP90AB1,ANOS1,LRP4,MAP2,RAB8A,NCAM1,NFIB,NOTCH2,NTRK2,OPHN1,PAK1,PAX2,PLXNA1,POU4F1,MAPK1,RELN,PTEN,PTK2,PTPRA,PTPRS,RAP2A,ROBO1,ROBO2,SDC2,SLIT1,SLIT3,SPTBN1,NR2E1,TNR,TRIO,TRPC6,VEGFA,EZR,KLF7,IRS2,SYNGAP1,B4GALT5,RIPOR2,ABI2,PLXNC1,PDLIM5,SHANK2,PALLD,TNIK,AUTS2,SH3KBP1,MINK1,NIN,SHC3,PLXNA3,ENAH,PARD3,KIDINS220,PR…
2_Member	GO Biological Processes	GO:0000904	cell morphogenesis involved in differentiation	-16.0708	-12.7532	88/723	214,348,596,658,1002,1501,1630,1813,1948,2039,2534,2637,2737,2887,2909,3326,3730,4038,4133,4218,4684,4781,4853,4915,4983,5058,5076,5361,5457,5594,5649,5728,5747,5786,5802,5911,6091,6092,6383,6585,6586,6711,7010,7101,7143,7204,7225,7422,7430,8609,8660,8831,9334,9750,10152,10154,10461,10611,10675,10979,22941,23022,23043,23189,26053,30011,50488,51199,53358,55435,55558,55740,55742,56288,57498,80243,8…	ALCAM,APOE,BCL2,BMPR1B,CDH4,CTNND2,DCC,DRD2,EFNB2,DMTN,FYN,GBX2,GLI3,GRB10,ARHGAP35,HSP90AB1,ANOS1,LRP4,MAP2,RAB8A,NCAM1,NFIB,NOTCH2,NTRK2,OPHN1,PAK1,PAX2,PLXNA1,POU4F1,MAPK1,RELN,PTEN,PTK2,PTPRA,PTPRS,RAP2A,ROBO1,ROBO2,SDC2,SLIT1,SLIT3,SPTBN1,TEK,NR2E1,TNR,TRIO,TRPC6,VEGFA,EZR,KLF7,IRS2,SYNGAP1,B4GALT5,RIPOR2,ABI2,PLXNC1,MERTK,PDLIM5,CSPG5,FERMT2,SHANK2,PALLD,TNIK,KANK1,AUTS2,SH3KBP1,MINK1,NIN,S…
2_Member	GO Biological Processes	GO:0007409	axonogenesis	-15.6392	-12.3595	66/460	214,348,596,658,1002,1630,1813,1948,2534,2637,2737,2887,2909,3326,3730,4038,4133,4218,4684,4781,4853,4915,4983,5058,5076,5361,5457,5594,5649,5728,5747,5786,5802,6091,6092,6585,6586,6711,7101,7143,7204,7422,7430,8609,8660,8831,9334,10154,23022,26053,30011,51199,53358,55558,55740,56288,84631,84894,85440,89884,150465,220164,223117,285220,347733,374946	ALCAM,APOE,BCL2,BMPR1B,CDH4,DCC,DRD2,EFNB2,FYN,GBX2,GLI3,GRB10,ARHGAP35,HSP90AB1,ANOS1,LRP4,MAP2,RAB8A,NCAM1,NFIB,NOTCH2,NTRK2,OPHN1,PAK1,PAX2,PLXNA1,POU4F1,MAPK1,RELN,PTEN,PTK2,PTPRA,PTPRS,ROBO1,ROBO2,SLIT1,SLIT3,SPTBN1,NR2E1,TNR,TRIO,VEGFA,EZR,KLF7,IRS2,SYNGAP1,B4GALT5,PLXNC1,PALLD,AUTS2,SH3KBP1,NIN,SHC3,PLXNA3,ENAH,PARD3,SLITRK2,LINGO1,DOCK7,LHX4,TTL,DOK6,SEMA3D,EPHA6,TUBB2B,DRAXIN
2_Member	GO Biological Processes	GO:0061564	axon development	-14.5938	-11.3488	68/507	214,348,596,658,1002,1630,1813,1948,2534,2637,2737,2887,2909,3326,3730,4038,4133,4218,4684,4685,4781,4853,4915,4983,5058,5076,5361,5457,5594,5649,5728,5747,5786,5792,5802,6091,6092,6585,6586,6711,7101,7143,7204,7422,7430,8609,8660,8831,9334,10154,23022,26053,30011,51199,53358,55558,55740,56288,84631,84894,85440,89884,150465,220164,223117,285220,347733,374946	ALCAM,APOE,BCL2,BMPR1B,CDH4,DCC,DRD2,EFNB2,FYN,GBX2,GLI3,GRB10,ARHGAP35,HSP90AB1,ANOS1,LRP4,MAP2,RAB8A,NCAM1,NCAM2,NFIB,NOTCH2,NTRK2,OPHN1,PAK1,PAX2,PLXNA1,POU4F1,MAPK1,RELN,PTEN,PTK2,PTPRA,PTPRF,PTPRS,ROBO1,ROBO2,SLIT1,SLIT3,SPTBN1,NR2E1,TNR,TRIO,VEGFA,EZR,KLF7,IRS2,SYNGAP1,B4GALT5,PLXNC1,PALLD,AUTS2,SH3KBP1,NIN,SHC3,PLXNA3,ENAH,PARD3,SLITRK2,LINGO1,DOCK7,LHX4,TTL,DOK6,SEMA3D,EPHA6,TUBB2B,DRAXIN
2_Member	GO Biological Processes	GO:0007411	axon guidance	-11.5593	-8.52259	43/277	214,658,1002,1630,1948,2534,2637,2737,2887,2909,3730,4684,4781,4853,4983,5361,5594,5649,5747,5786,6091,6092,6585,6586,6711,7143,7204,7422,7430,8609,8660,10154,23022,30011,53358,55558,55740,89884,220164,223117,285220,347733,374946	ALCAM,BMPR1B,CDH4,DCC,EFNB2,FYN,GBX2,GLI3,GRB10,ARHGAP35,ANOS1,NCAM1,NFIB,NOTCH2,OPHN1,PLXNA1,MAPK1,RELN,PTK2,PTPRA,ROBO1,ROBO2,SLIT1,SLIT3,SPTBN1,TNR,TRIO,VEGFA,EZR,KLF7,IRS2,PLXNC1,PALLD,SH3KBP1,SHC3,PLXNA3,ENAH,LHX4,DOK6,SEMA3D,EPHA6,TUBB2B,DRAXIN
2_Member	GO Biological Processes	GO:0097485	neuron projection guidance	-11.5057	-8.49181	43/278	214,658,1002,1630,1948,2534,2637,2737,2887,2909,3730,4684,4781,4853,4983,5361,5594,5649,5747,5786,6091,6092,6585,6586,6711,7143,7204,7422,7430,8609,8660,10154,23022,30011,53358,55558,55740,89884,220164,223117,285220,347733,374946	ALCAM,BMPR1B,CDH4,DCC,EFNB2,FYN,GBX2,GLI3,GRB10,ARHGAP35,ANOS1,NCAM1,NFIB,NOTCH2,OPHN1,PLXNA1,MAPK1,RELN,PTK2,PTPRA,ROBO1,ROBO2,SLIT1,SLIT3,SPTBN1,TNR,TRIO,VEGFA,EZR,KLF7,IRS2,PLXNC1,PALLD,SH3KBP1,SHC3,PLXNA3,ENAH,LHX4,DOK6,SEMA3D,EPHA6,TUBB2B,DRAXIN
2_Member	GO Biological Processes	GO:0045664	regulation of neuron differentiation	-10.9582	-7.97955	71/645	152,238,348,482,596,1002,1272,1453,1630,1656,1809,1910,1948,2534,2737,2909,4038,4133,4915,5058,5361,5649,5728,5792,5802,5911,6091,6092,6383,6657,6664,6935,7068,7101,7143,7225,7336,7422,8321,8507,8831,8904,9362,10152,10154,10220,10611,22941,22999,23025,23043,23189,23251,23413,23531,51199,51657,51760,55364,55558,57154,57498,57554,80823,84894,150465,221938,223117,347733,374946,388585	ADRA2C,ALK,APOE,ATP1B2,BCL2,CDH4,CNTN1,CSNK1D,DCC,DDX6,DPYSL3,EDNRB,EFNB2,FYN,GLI3,ARHGAP35,LRP4,MAP2,NTRK2,PAK1,PLXNA1,RELN,PTEN,PTPRF,PTPRS,RAP2A,ROBO1,ROBO2,SDC2,SOX2,SOX11,ZEB1,THRB,NR2E1,TNR,TRPC6,UBE2V2,VEGFA,FZD1,ENC1,SYNGAP1,CPNE1,CPNE6,ABI2,PLXNC1,GDF11,PDLIM5,SHANK2,RIMS1,UNC13A,TNIK,KANK1,MINAR1,NCS1,MMD,NIN,STYXL1,SYT17,IMPACT,PLXNA3,SMURF1,KIDINS220,LRRC7,BHLHB9,LINGO1,TTL,MMD2,SEMA3…
2_Member	GO Biological Processes	GO:0120035	regulation of plasma membrane bounded cell projection organization	-10.0673	-7.15556	73/703	238,348,482,1002,1272,1630,1809,1948,2039,2534,2904,2909,4038,4133,4651,4915,5058,5064,5361,5649,5728,5792,5802,5898,5911,6091,6092,6101,6383,7101,7143,7225,7336,7422,7430,8321,8507,8831,9362,9750,10152,10154,10178,10413,10611,10801,22941,22999,23025,23043,23189,23251,23413,26053,51199,51657,51760,54874,55558,57154,57498,57533,57554,79647,79734,80823,84894,90410,150465,223117,347733,374946,100506…	ALK,APOE,ATP1B2,CDH4,CNTN1,DCC,DPYSL3,EFNB2,DMTN,FYN,GRIN2B,ARHGAP35,LRP4,MAP2,MYO10,NTRK2,PAK1,PALM,PLXNA1,RELN,PTEN,PTPRF,PTPRS,RALA,RAP2A,ROBO1,ROBO2,RP1,SDC2,NR2E1,TNR,TRPC6,UBE2V2,VEGFA,EZR,FZD1,ENC1,SYNGAP1,CPNE6,RIPOR2,ABI2,PLXNC1,TENM1,YAP1,PDLIM5,SEPTIN9,SHANK2,RIMS1,UNC13A,TNIK,KANK1,MINAR1,NCS1,AUTS2,NIN,STYXL1,SYT17,FNBP1L,PLXNA3,SMURF1,KIDINS220,TBC1D14,LRRC7,AKIRIN1,KCTD17,BHLHB9,LI…
2_Member	GO Biological Processes	GO:0022604	regulation of cell morphogenesis	-9.96452	-7.06801	57/486	348,1002,1630,1690,2039,2534,2909,4038,4133,4628,4651,4915,5058,5064,5361,5649,5728,5747,5802,5911,6091,6092,6284,6383,7101,7143,7225,7422,7430,8831,9203,9362,10152,10154,10611,10675,10979,22999,23025,23043,23189,30011,51199,51760,54873,55435,55558,55742,57154,80823,84894,150465,157922,223117,347733,374946,445815	APOE,CDH4,DCC,COCH,DMTN,FYN,ARHGAP35,LRP4,MAP2,MYH10,MYO10,NTRK2,PAK1,PALM,PLXNA1,RELN,PTEN,PTK2,PTPRS,RAP2A,ROBO1,ROBO2,S100A13,SDC2,NR2E1,TNR,TRPC6,VEGFA,EZR,SYNGAP1,ZMYM3,CPNE6,ABI2,PLXNC1,PDLIM5,CSPG5,FERMT2,RIMS1,UNC13A,TNIK,KANK1,SH3KBP1,NIN,SYT17,PALMD,AP1AR,PLXNA3,PARVA,SMURF1,BHLHB9,LINGO1,TTL,CAMSAP1,SEMA3D,TUBB2B,DRAXIN,PALM2AKAP2
2_Member	GO Biological Processes	GO:0031344	regulation of cell projection organization	-9.81605	-6.93426	73/712	238,348,482,1002,1272,1630,1809,1948,2039,2534,2904,2909,4038,4133,4651,4915,5058,5064,5361,5649,5728,5792,5802,5898,5911,6091,6092,6101,6383,7101,7143,7225,7336,7422,7430,8321,8507,8831,9362,9750,10152,10154,10178,10413,10611,10801,22941,22999,23025,23043,23189,23251,23413,26053,51199,51657,51760,54874,55558,57154,57498,57533,57554,79647,79734,80823,84894,90410,150465,223117,347733,374946,100506…	ALK,APOE,ATP1B2,CDH4,CNTN1,DCC,DPYSL3,EFNB2,DMTN,FYN,GRIN2B,ARHGAP35,LRP4,MAP2,MYO10,NTRK2,PAK1,PALM,PLXNA1,RELN,PTEN,PTPRF,PTPRS,RALA,RAP2A,ROBO1,ROBO2,RP1,SDC2,NR2E1,TNR,TRPC6,UBE2V2,VEGFA,EZR,FZD1,ENC1,SYNGAP1,CPNE6,RIPOR2,ABI2,PLXNC1,TENM1,YAP1,PDLIM5,SEPTIN9,SHANK2,RIMS1,UNC13A,TNIK,KANK1,MINAR1,NCS1,AUTS2,NIN,STYXL1,SYT17,FNBP1L,PLXNA3,SMURF1,KIDINS220,TBC1D14,LRRC7,AKIRIN1,KCTD17,BHLHB9,LI…
2_Member	Reactome Gene Sets	R-HSA-9675108	Nervous system development	-9.67519	-6.80764	63/576	163,214,287,1272,1457,1630,1809,1948,2534,2887,2904,2909,3156,3326,3678,4628,4651,4684,5058,5296,5361,5594,5649,5747,5786,6091,6092,6159,6168,6170,6229,6328,6383,6585,6586,6711,7003,7204,7223,7225,7430,8660,8861,9355,9495,10154,10413,10486,22916,23708,26019,30011,53358,55558,55740,55800,84059,89884,116986,220164,285220,347733,100133941	AP2B1,ALCAM,ANK2,CNTN1,CSNK2A1,DCC,DPYSL3,EFNB2,FYN,GRB10,GRIN2B,ARHGAP35,HMGCR,HSP90AB1,ITGA5,MYH10,MYO10,NCAM1,PAK1,PIK3R2,PLXNA1,MAPK1,RELN,PTK2,PTPRA,ROBO1,ROBO2,RPL29,RPL37A,RPL39,RPS24,SCN3A,SDC2,SLIT1,SLIT3,SPTBN1,TEAD1,TRIO,TRPC4,TRPC6,EZR,IRS2,LDB1,LHX2,AKAP5,PLXNC1,YAP1,CAP2,NCBP2,GSPT2,UPF2,SH3KBP1,SHC3,PLXNA3,ENAH,SCN3B,ADGRV1,LHX4,AGAP2,DOK6,EPHA6,TUBB2B,CD24
2_Member	Reactome Gene Sets	R-HSA-422475	Axon guidance	-8.74907	-5.96995	59/551	163,214,287,1272,1457,1630,1809,1948,2534,2887,2904,2909,3326,3678,4628,4651,4684,5058,5296,5361,5594,5649,5747,5786,6091,6092,6159,6168,6170,6229,6328,6383,6585,6586,6711,7204,7223,7225,7430,8660,8861,9355,9495,10154,10486,22916,23708,26019,30011,53358,55558,55740,55800,89884,116986,220164,285220,347733,100133941	AP2B1,ALCAM,ANK2,CNTN1,CSNK2A1,DCC,DPYSL3,EFNB2,FYN,GRB10,GRIN2B,ARHGAP35,HSP90AB1,ITGA5,MYH10,MYO10,NCAM1,PAK1,PIK3R2,PLXNA1,MAPK1,RELN,PTK2,PTPRA,ROBO1,ROBO2,RPL29,RPL37A,RPL39,RPS24,SCN3A,SDC2,SLIT1,SLIT3,SPTBN1,TRIO,TRPC4,TRPC6,EZR,IRS2,LDB1,LHX2,AKAP5,PLXNC1,CAP2,NCBP2,GSPT2,UPF2,SH3KBP1,SHC3,PLXNA3,ENAH,SCN3B,LHX4,AGAP2,DOK6,EPHA6,TUBB2B,CD24
2_Member	GO Biological Processes	GO:0010975	regulation of neuron projection development	-8.70862	-5.94078	55/497	238,348,482,1002,1272,1630,1809,1948,2534,2909,4038,4133,4915,5058,5361,5649,5728,5792,5802,5911,6091,6092,6383,7101,7143,7225,7336,7422,8321,8507,8831,9362,10152,10154,10611,22941,22999,23025,23043,23189,23251,23413,51199,51657,51760,55558,57154,57498,57554,80823,84894,150465,223117,347733,374946	ALK,APOE,ATP1B2,CDH4,CNTN1,DCC,DPYSL3,EFNB2,FYN,ARHGAP35,LRP4,MAP2,NTRK2,PAK1,PLXNA1,RELN,PTEN,PTPRF,PTPRS,RAP2A,ROBO1,ROBO2,SDC2,NR2E1,TNR,TRPC6,UBE2V2,VEGFA,FZD1,ENC1,SYNGAP1,CPNE6,ABI2,PLXNC1,PDLIM5,SHANK2,RIMS1,UNC13A,TNIK,KANK1,MINAR1,NCS1,NIN,STYXL1,SYT17,PLXNA3,SMURF1,KIDINS220,LRRC7,BHLHB9,LINGO1,TTL,SEMA3D,TUBB2B,DRAXIN
2_Member	GO Biological Processes	GO:0010769	regulation of cell morphogenesis involved in differentiation	-8.25541	-5.52997	39/300	348,1002,1630,2039,2909,4038,4133,4915,5058,5361,5649,5728,5747,5802,5911,6091,6092,6383,7101,7143,7225,7422,8831,10152,10154,10611,10675,10979,23043,23189,51199,55435,55558,80823,84894,150465,223117,347733,374946	APOE,CDH4,DCC,DMTN,ARHGAP35,LRP4,MAP2,NTRK2,PAK1,PLXNA1,RELN,PTEN,PTK2,PTPRS,RAP2A,ROBO1,ROBO2,SDC2,NR2E1,TNR,TRPC6,VEGFA,SYNGAP1,ABI2,PLXNC1,PDLIM5,CSPG5,FERMT2,TNIK,KANK1,NIN,AP1AR,PLXNA3,BHLHB9,LINGO1,TTL,SEMA3D,TUBB2B,DRAXIN
2_Member	GO Biological Processes	GO:0051962	positive regulation of nervous system development	-7.83861	-5.14246	55/526	152,238,348,482,596,1002,1272,1453,1809,1813,2534,2737,2909,4602,4915,5021,5058,5076,5361,5649,5728,5803,6091,6092,6664,6935,7225,7336,7422,8321,8507,8904,9362,10154,22941,22999,23025,23440,23531,51199,51657,51760,55364,55558,56288,57154,57498,57554,57633,63950,80823,84631,94030,221938,347733	ADRA2C,ALK,APOE,ATP1B2,BCL2,CDH4,CNTN1,CSNK1D,DPYSL3,DRD2,FYN,GLI3,ARHGAP35,MYB,NTRK2,OXTR,PAK1,PAX2,PLXNA1,RELN,PTEN,PTPRZ1,ROBO1,ROBO2,SOX11,ZEB1,TRPC6,UBE2V2,VEGFA,FZD1,ENC1,CPNE1,CPNE6,PLXNC1,SHANK2,RIMS1,UNC13A,OTP,MMD,NIN,STYXL1,SYT17,IMPACT,PLXNA3,PARD3,SMURF1,KIDINS220,LRRC7,LRRN1,DMRTA2,BHLHB9,SLITRK2,LRRC4B,MMD2,TUBB2B
2_Member	GO Biological Processes	GO:0045666	positive regulation of neuron differentiation	-7.73478	-5.08344	43/365	152,238,348,482,596,1002,1272,1453,1809,2534,2909,4915,5058,5361,5649,5728,6091,6092,6664,6935,7225,7336,7422,8321,8507,8904,9362,10154,22941,22999,23025,23531,51199,51657,51760,55364,55558,57154,57498,57554,80823,221938,347733	ADRA2C,ALK,APOE,ATP1B2,BCL2,CDH4,CNTN1,CSNK1D,DPYSL3,FYN,ARHGAP35,NTRK2,PAK1,PLXNA1,RELN,PTEN,ROBO1,ROBO2,SOX11,ZEB1,TRPC6,UBE2V2,VEGFA,FZD1,ENC1,CPNE1,CPNE6,PLXNC1,SHANK2,RIMS1,UNC13A,MMD,NIN,STYXL1,SYT17,IMPACT,PLXNA3,SMURF1,KIDINS220,LRRC7,BHLHB9,MMD2,TUBB2B
2_Member	GO Biological Processes	GO:0031346	positive regulation of cell projection organization	-7.6066	-4.97197	44/382	238,348,482,1002,1272,1809,2534,2909,4915,5058,5064,5361,5649,5898,6091,6092,6101,7336,7422,8321,8507,9362,9750,10152,10154,10178,10801,22941,22999,23025,26053,51199,51657,51760,54874,55558,57154,57498,57554,79647,79734,80823,347733,100506658	ALK,APOE,ATP1B2,CDH4,CNTN1,DPYSL3,FYN,ARHGAP35,NTRK2,PAK1,PALM,PLXNA1,RELN,RALA,ROBO1,ROBO2,RP1,UBE2V2,VEGFA,FZD1,ENC1,CPNE6,RIPOR2,ABI2,PLXNC1,TENM1,SEPTIN9,SHANK2,RIMS1,UNC13A,AUTS2,NIN,STYXL1,SYT17,FNBP1L,PLXNA3,SMURF1,KIDINS220,LRRC7,AKIRIN1,KCTD17,BHLHB9,TUBB2B,OCLN
2_Member	GO Biological Processes	GO:0010720	positive regulation of cell development	-7.25971	-4.64899	55/547	152,238,348,482,596,1002,1272,1453,1809,1813,2039,2534,2737,2909,3479,4602,4915,5058,5139,5361,5649,5728,5803,5991,6091,6092,6664,6935,7225,7336,7422,8321,8507,8904,9362,10154,10675,10979,22941,22999,23025,23440,23531,51199,51657,51760,55364,55558,57154,57498,57554,63950,80823,221938,347733	ADRA2C,ALK,APOE,ATP1B2,BCL2,CDH4,CNTN1,CSNK1D,DPYSL3,DRD2,DMTN,FYN,GLI3,ARHGAP35,IGF1,MYB,NTRK2,PAK1,PDE3A,PLXNA1,RELN,PTEN,PTPRZ1,RFX3,ROBO1,ROBO2,SOX11,ZEB1,TRPC6,UBE2V2,VEGFA,FZD1,ENC1,CPNE1,CPNE6,PLXNC1,CSPG5,FERMT2,SHANK2,RIMS1,UNC13A,OTP,MMD,NIN,STYXL1,SYT17,IMPACT,PLXNA3,SMURF1,KIDINS220,LRRC7,DMRTA2,BHLHB9,MMD2,TUBB2B
2_Member	GO Biological Processes	GO:0050769	positive regulation of neurogenesis	-7.18716	-4.6064	49/464	152,238,348,482,596,1002,1272,1453,1809,1813,2534,2737,2909,4602,4915,5058,5361,5649,5728,5803,6091,6092,6664,6935,7225,7336,7422,8321,8507,8904,9362,10154,22941,22999,23025,23440,23531,51199,51657,51760,55364,55558,57154,57498,57554,63950,80823,221938,347733	ADRA2C,ALK,APOE,ATP1B2,BCL2,CDH4,CNTN1,CSNK1D,DPYSL3,DRD2,FYN,GLI3,ARHGAP35,MYB,NTRK2,PAK1,PLXNA1,RELN,PTEN,PTPRZ1,ROBO1,ROBO2,SOX11,ZEB1,TRPC6,UBE2V2,VEGFA,FZD1,ENC1,CPNE1,CPNE6,PLXNC1,SHANK2,RIMS1,UNC13A,OTP,MMD,NIN,STYXL1,SYT17,IMPACT,PLXNA3,SMURF1,KIDINS220,LRRC7,DMRTA2,BHLHB9,MMD2,TUBB2B
2_Member	GO Biological Processes	GO:0006935	chemotaxis	-6.00895	-3.66128	58/644	214,658,1002,1630,1901,1910,1948,1960,2152,2534,2637,2737,2887,2909,3730,4684,4781,4853,4983,5156,5288,5361,5594,5649,5747,5786,5795,5872,5898,6091,6092,6373,6585,6586,6711,7143,7204,7422,7430,8609,8660,9097,9750,10154,23022,30011,53358,55558,55740,55742,79647,89884,152189,220164,223117,285220,347733,374946	ALCAM,BMPR1B,CDH4,DCC,S1PR1,EDNRB,EFNB2,EGR3,F3,FYN,GBX2,GLI3,GRB10,ARHGAP35,ANOS1,NCAM1,NFIB,NOTCH2,OPHN1,PDGFRA,PIK3C2G,PLXNA1,MAPK1,RELN,PTK2,PTPRA,PTPRJ,RAB13,RALA,ROBO1,ROBO2,CXCL11,SLIT1,SLIT3,SPTBN1,TNR,TRIO,VEGFA,EZR,KLF7,IRS2,USP14,RIPOR2,PLXNC1,PALLD,SH3KBP1,SHC3,PLXNA3,ENAH,PARVA,AKIRIN1,LHX4,CMTM8,DOK6,SEMA3D,EPHA6,TUBB2B,DRAXIN
2_Member	GO Biological Processes	GO:0042330	taxis	-5.96591	-3.62403	58/646	214,658,1002,1630,1901,1910,1948,1960,2152,2534,2637,2737,2887,2909,3730,4684,4781,4853,4983,5156,5288,5361,5594,5649,5747,5786,5795,5872,5898,6091,6092,6373,6585,6586,6711,7143,7204,7422,7430,8609,8660,9097,9750,10154,23022,30011,53358,55558,55740,55742,79647,89884,152189,220164,223117,285220,347733,374946	ALCAM,BMPR1B,CDH4,DCC,S1PR1,EDNRB,EFNB2,EGR3,F3,FYN,GBX2,GLI3,GRB10,ARHGAP35,ANOS1,NCAM1,NFIB,NOTCH2,OPHN1,PDGFRA,PIK3C2G,PLXNA1,MAPK1,RELN,PTK2,PTPRA,PTPRJ,RAB13,RALA,ROBO1,ROBO2,CXCL11,SLIT1,SLIT3,SPTBN1,TNR,TRIO,VEGFA,EZR,KLF7,IRS2,USP14,RIPOR2,PLXNC1,PALLD,SH3KBP1,SHC3,PLXNA3,ENAH,PARVA,AKIRIN1,LHX4,CMTM8,DOK6,SEMA3D,EPHA6,TUBB2B,DRAXIN
2_Member	KEGG Pathway	hsa04360	Axon guidance	-5.89576	-3.57824	26/196	658,817,1630,1948,2534,5058,5296,5361,5534,5594,5747,6091,6092,6585,6586,7223,7225,8831,10154,54434,54498,55558,55740,56288,223117,285220	BMPR1B,CAMK2D,DCC,EFNB2,FYN,PAK1,PIK3R2,PLXNA1,PPP3R1,MAPK1,PTK2,ROBO1,ROBO2,SLIT1,SLIT3,TRPC4,TRPC6,SYNGAP1,PLXNC1,SSH1,SMOX,PLXNA3,ENAH,PARD3,SEMA3D,EPHA6
2_Member	GO Biological Processes	GO:0050770	regulation of axonogenesis	-5.84193	-3.54158	24/173	348,1002,1630,2909,4038,4133,4915,5058,5361,5728,5802,6091,6092,7143,7422,8831,10154,51199,55558,84894,150465,223117,347733,374946	APOE,CDH4,DCC,ARHGAP35,LRP4,MAP2,NTRK2,PAK1,PLXNA1,PTEN,PTPRS,ROBO1,ROBO2,TNR,VEGFA,SYNGAP1,PLXNC1,NIN,PLXNA3,LINGO1,TTL,SEMA3D,TUBB2B,DRAXIN
2_Member	KEGG Pathway	ko04360	Axon guidance	-5.75159	-3.47905	24/175	658,817,1630,1948,2534,5058,5296,5361,5534,5594,5747,6091,6092,6585,6586,7223,7225,10154,54434,55558,55740,56288,223117,285220	BMPR1B,CAMK2D,DCC,EFNB2,FYN,PAK1,PIK3R2,PLXNA1,PPP3R1,MAPK1,PTK2,ROBO1,ROBO2,SLIT1,SLIT3,TRPC4,TRPC6,PLXNC1,SSH1,PLXNA3,ENAH,PARD3,SEMA3D,EPHA6
2_Member	GO Biological Processes	GO:0010976	positive regulation of neuron projection development	-5.70834	-3.44634	32/278	238,348,482,1002,1272,1809,2534,2909,4915,5058,5361,5649,6091,6092,7336,7422,8321,8507,9362,10154,22941,22999,23025,51199,51657,51760,55558,57154,57498,57554,80823,347733	ALK,APOE,ATP1B2,CDH4,CNTN1,DPYSL3,FYN,ARHGAP35,NTRK2,PAK1,PLXNA1,RELN,ROBO1,ROBO2,UBE2V2,VEGFA,FZD1,ENC1,CPNE6,PLXNC1,SHANK2,RIMS1,UNC13A,NIN,STYXL1,SYT17,PLXNA3,SMURF1,KIDINS220,LRRC7,BHLHB9,TUBB2B
2_Member	GO Biological Processes	GO:0050772	positive regulation of axonogenesis	-3.01697	-1.42522	11/79	1002,4915,5058,5361,6091,6092,7422,10154,51199,55558,347733	CDH4,NTRK2,PAK1,PLXNA1,ROBO1,ROBO2,VEGFA,PLXNC1,NIN,PLXNA3,TUBB2B
2_Member	GO Biological Processes	GO:0010770	positive regulation of cell morphogenesis involved in differentiation	-2.78145	-1.2541	16/151	1002,2039,4915,5058,5361,5649,6091,6092,7422,10154,10675,10979,51199,55558,80823,347733	CDH4,DMTN,NTRK2,PAK1,PLXNA1,RELN,ROBO1,ROBO2,VEGFA,PLXNC1,CSPG5,FERMT2,NIN,PLXNA3,BHLHB9,TUBB2B
2_Member	Reactome Gene Sets	R-HSA-376176	Signaling by ROBO receptors	-2.22522	-0.849035	19/218	1630,5058,6091,6092,6159,6168,6170,6229,6585,6586,8861,9355,9495,10486,22916,23708,26019,55740,89884	DCC,PAK1,ROBO1,ROBO2,RPL29,RPL37A,RPL39,RPS24,SLIT1,SLIT3,LDB1,LHX2,AKAP5,CAP2,NCBP2,GSPT2,UPF2,ENAH,LHX4
3_Summary	Reactome Gene Sets	R-HSA-112316	Neuronal System	-17.6297	-14.2708	65/410	163,217,320,590,781,814,817,1740,2037,2066,2555,2556,2558,2560,2562,2742,2774,2790,2890,2897,2898,2904,2905,2915,3755,3758,4128,5330,5579,5582,5594,5792,5802,6506,6507,6854,7881,8001,8514,9066,9132,9256,9312,9379,9495,10611,22829,22843,22941,22999,24145,27012,55970,57030,57502,57596,60482,80331,84631,90134,94030,143425,170850,347730,347733	AP2B1,ALDH2,APBA1,BCHE,CACNA2D1,CAMK4,CAMK2D,DLG2,EPB41L2,ERBB4,GABRA2,GABRA3,GABRA5,GABRB1,GABRB3,GLRA2,GNAL,GNG10,GRIA1,GRIK1,GRIK2,GRIN2B,GRIN2C,GRM5,KCNG1,KCNJ1,MAOA,PLCB2,PRKCB,PRKCG,MAPK1,PTPRF,PTPRS,SLC1A2,SLC1A3,SYN2,KCNAB1,GLRA3,KCNAB2,SYT7,KCNQ4,TSPOAP1,KCNB2,NRXN2,AKAP5,PDLIM5,NLGN4Y,PPM1E,SHANK2,RIMS1,PANX1,KCNV1,GNG12,SLC17A7,NLGN4X,BEGAIN,SLC5A7,DNAJC5,SLITRK2,KCNH7,LRRC4B,SYT9,KCNG…
3_Member	Reactome Gene Sets	R-HSA-112316	Neuronal System	-17.6297	-14.2708	65/410	163,217,320,590,781,814,817,1740,2037,2066,2555,2556,2558,2560,2562,2742,2774,2790,2890,2897,2898,2904,2905,2915,3755,3758,4128,5330,5579,5582,5594,5792,5802,6506,6507,6854,7881,8001,8514,9066,9132,9256,9312,9379,9495,10611,22829,22843,22941,22999,24145,27012,55970,57030,57502,57596,60482,80331,84631,90134,94030,143425,170850,347730,347733	AP2B1,ALDH2,APBA1,BCHE,CACNA2D1,CAMK4,CAMK2D,DLG2,EPB41L2,ERBB4,GABRA2,GABRA3,GABRA5,GABRB1,GABRB3,GLRA2,GNAL,GNG10,GRIA1,GRIK1,GRIK2,GRIN2B,GRIN2C,GRM5,KCNG1,KCNJ1,MAOA,PLCB2,PRKCB,PRKCG,MAPK1,PTPRF,PTPRS,SLC1A2,SLC1A3,SYN2,KCNAB1,GLRA3,KCNAB2,SYT7,KCNQ4,TSPOAP1,KCNB2,NRXN2,AKAP5,PDLIM5,NLGN4Y,PPM1E,SHANK2,RIMS1,PANX1,KCNV1,GNG12,SLC17A7,NLGN4X,BEGAIN,SLC5A7,DNAJC5,SLITRK2,KCNH7,LRRC4B,SYT9,KCNG…
3_Member	Reactome Gene Sets	R-HSA-112315	Transmission across Chemical Synapses	-10.1602	-7.23263	40/270	163,217,320,590,781,814,817,1740,2066,2555,2556,2558,2560,2562,2742,2774,2790,2890,2897,2898,2904,2905,4128,5330,5579,5582,5594,6506,6507,6854,8001,9256,9495,22843,22999,55970,57030,60482,80331,347733	AP2B1,ALDH2,APBA1,BCHE,CACNA2D1,CAMK4,CAMK2D,DLG2,ERBB4,GABRA2,GABRA3,GABRA5,GABRB1,GABRB3,GLRA2,GNAL,GNG10,GRIA1,GRIK1,GRIK2,GRIN2B,GRIN2C,MAOA,PLCB2,PRKCB,PRKCG,MAPK1,SLC1A2,SLC1A3,SYN2,GLRA3,TSPOAP1,AKAP5,PPM1E,RIMS1,GNG12,SLC17A7,SLC5A7,DNAJC5,TUBB2B
3_Member	Reactome Gene Sets	R-HSA-112314	Neurotransmitter receptors and postsynaptic signal transmission	-6.56183	-4.11307	28/205	163,320,814,817,1740,2066,2555,2556,2558,2560,2562,2742,2774,2790,2890,2897,2898,2904,2905,5330,5579,5582,5594,8001,9495,22843,55970,347733	AP2B1,APBA1,CAMK4,CAMK2D,DLG2,ERBB4,GABRA2,GABRA3,GABRA5,GABRB1,GABRB3,GLRA2,GNAL,GNG10,GRIA1,GRIK1,GRIK2,GRIN2B,GRIN2C,PLCB2,PRKCB,PRKCG,MAPK1,GLRA3,AKAP5,PPM1E,GNG12,TUBB2B
4_Summary	GO Biological Processes	GO:0007420	brain development	-13.7148	-10.56	82/710	190,205,238,317,477,482,493,596,1272,1453,1813,1901,2018,2066,2334,2534,2558,2637,2737,2746,2775,2904,2905,2909,3176,3340,4204,4763,4781,4915,4983,5013,5021,5058,5076,5089,5457,5649,5728,5802,6091,6092,6271,6585,6586,6657,6751,6752,7026,7101,7143,7881,8321,8660,8854,8861,8891,9289,22941,23026,23440,51199,55558,55970,56934,57030,57447,57502,63950,63974,79109,83943,84623,84687,85440,139411,221692,2…	NR0B1,AK4,ALK,APAF1,ATP1A2,ATP1B2,ATP2B4,BCL2,CNTN1,CSNK1D,DRD2,S1PR1,EMX2,ERBB4,AFF2,FYN,GABRA5,GBX2,GLI3,GLUD1,GNAO1,GRIN2B,GRIN2C,ARHGAP35,HNMT,NDST1,MECP2,NF1,NFIB,NTRK2,OPHN1,OTX1,OXTR,PAK1,PAX2,PBX2,POU4F1,RELN,PTEN,PTPRS,ROBO1,ROBO2,S100A1,SLIT1,SLIT3,SOX2,SSTR1,SSTR2,NR2F2,NR2E1,TNR,KCNAB1,FZD1,IRS2,ALDH1A2,LDB1,EIF2B3,ADGRG1,SHANK2,MYO16,OTP,NIN,PLXNA3,GNG12,CA10,SLC17A7,NDRG2,NLGN4X,DMR…
4_Member	GO Biological Processes	GO:0007420	brain development	-13.7148	-10.56	82/710	190,205,238,317,477,482,493,596,1272,1453,1813,1901,2018,2066,2334,2534,2558,2637,2737,2746,2775,2904,2905,2909,3176,3340,4204,4763,4781,4915,4983,5013,5021,5058,5076,5089,5457,5649,5728,5802,6091,6092,6271,6585,6586,6657,6751,6752,7026,7101,7143,7881,8321,8660,8854,8861,8891,9289,22941,23026,23440,51199,55558,55970,56934,57030,57447,57502,63950,63974,79109,83943,84623,84687,85440,139411,221692,2…	NR0B1,AK4,ALK,APAF1,ATP1A2,ATP1B2,ATP2B4,BCL2,CNTN1,CSNK1D,DRD2,S1PR1,EMX2,ERBB4,AFF2,FYN,GABRA5,GBX2,GLI3,GLUD1,GNAO1,GRIN2B,GRIN2C,ARHGAP35,HNMT,NDST1,MECP2,NF1,NFIB,NTRK2,OPHN1,OTX1,OXTR,PAK1,PAX2,PBX2,POU4F1,RELN,PTEN,PTPRS,ROBO1,ROBO2,S100A1,SLIT1,SLIT3,SOX2,SSTR1,SSTR2,NR2F2,NR2E1,TNR,KCNAB1,FZD1,IRS2,ALDH1A2,LDB1,EIF2B3,ADGRG1,SHANK2,MYO16,OTP,NIN,PLXNA3,GNG12,CA10,SLC17A7,NDRG2,NLGN4X,DMR…
4_Member	GO Biological Processes	GO:0060322	head development	-13.2546	-10.1262	84/751	190,205,238,317,477,482,493,596,1272,1453,1813,1901,2018,2066,2334,2534,2558,2637,2737,2746,2775,2904,2905,2909,3176,3340,4204,4763,4781,4915,4983,5013,5021,5058,5076,5089,5156,5457,5594,5649,5728,5802,6091,6092,6271,6585,6586,6657,6751,6752,7026,7101,7143,7881,8321,8660,8854,8861,8891,9289,22941,23026,23440,51199,55558,55970,56934,57030,57447,57502,63950,63974,79109,83943,84623,84687,85440,13941…	NR0B1,AK4,ALK,APAF1,ATP1A2,ATP1B2,ATP2B4,BCL2,CNTN1,CSNK1D,DRD2,S1PR1,EMX2,ERBB4,AFF2,FYN,GABRA5,GBX2,GLI3,GLUD1,GNAO1,GRIN2B,GRIN2C,ARHGAP35,HNMT,NDST1,MECP2,NF1,NFIB,NTRK2,OPHN1,OTX1,OXTR,PAK1,PAX2,PBX2,PDGFRA,POU4F1,MAPK1,RELN,PTEN,PTPRS,ROBO1,ROBO2,S100A1,SLIT1,SLIT3,SOX2,SSTR1,SSTR2,NR2F2,NR2E1,TNR,KCNAB1,FZD1,IRS2,ALDH1A2,LDB1,EIF2B3,ADGRG1,SHANK2,MYO16,OTP,NIN,PLXNA3,GNG12,CA10,SLC17A7,NDR…
4_Member	GO Biological Processes	GO:0030900	forebrain development	-12.6627	-9.55904	52/358	190,238,317,477,482,493,1813,2018,2066,2534,2637,2737,2775,2909,3340,4763,4781,4915,4983,5013,5021,5457,5649,5728,5802,6091,6092,6585,6586,6657,6751,6752,7026,7101,7143,8854,8891,9289,23440,51199,55558,55970,63950,63974,84623,84687,85440,139411,221692,317762,374946,388585	NR0B1,ALK,APAF1,ATP1A2,ATP1B2,ATP2B4,DRD2,EMX2,ERBB4,FYN,GBX2,GLI3,GNAO1,ARHGAP35,NDST1,NF1,NFIB,NTRK2,OPHN1,OTX1,OXTR,POU4F1,RELN,PTEN,PTPRS,ROBO1,ROBO2,SLIT1,SLIT3,SOX2,SSTR1,SSTR2,NR2F2,NR2E1,TNR,ALDH1A2,EIF2B3,ADGRG1,OTP,NIN,PLXNA3,GNG12,DMRTA2,NEUROD6,KIRREL3,PPP1R9B,DOCK7,PTCHD1,PHACTR1,CCDC85C,DRAXIN,HES5
4_Member	GO Biological Processes	GO:0021537	telencephalon development	-8.46791	-5.72179	34/235	238,477,482,493,1813,2018,2066,2737,4763,4781,4915,5021,5649,5728,5802,6091,6092,6585,6586,7101,7143,8891,9289,51199,55558,55970,63950,63974,84623,84687,221692,317762,374946,388585	ALK,ATP1A2,ATP1B2,ATP2B4,DRD2,EMX2,ERBB4,GLI3,NF1,NFIB,NTRK2,OXTR,RELN,PTEN,PTPRS,ROBO1,ROBO2,SLIT1,SLIT3,NR2E1,TNR,EIF2B3,ADGRG1,NIN,PLXNA3,GNG12,DMRTA2,NEUROD6,KIRREL3,PPP1R9B,PHACTR1,CCDC85C,DRAXIN,HES5
4_Member	GO Biological Processes	GO:0021761	limbic system development	-5.64746	-3.39576	17/98	190,238,477,493,1813,2018,2737,5649,5728,5802,7101,8891,23440,55558,63974,84623,84687	NR0B1,ALK,ATP1A2,ATP2B4,DRD2,EMX2,GLI3,RELN,PTEN,PTPRS,NR2E1,EIF2B3,OTP,PLXNA3,NEUROD6,KIRREL3,PPP1R9B
4_Member	GO Biological Processes	GO:0021543	pallium development	-4.85814	-2.80479	21/159	238,493,2018,2737,4763,4915,5649,5728,5802,6091,7101,8891,9289,55558,55970,63950,63974,84623,84687,221692,317762	ALK,ATP2B4,EMX2,GLI3,NF1,NTRK2,RELN,PTEN,PTPRS,ROBO1,NR2E1,EIF2B3,ADGRG1,PLXNA3,GNG12,DMRTA2,NEUROD6,KIRREL3,PPP1R9B,PHACTR1,CCDC85C
4_Member	GO Biological Processes	GO:0021766	hippocampus development	-4.58919	-2.59389	13/73	238,493,2018,2737,5649,5728,5802,7101,8891,55558,63974,84623,84687	ALK,ATP2B4,EMX2,GLI3,RELN,PTEN,PTPRS,NR2E1,EIF2B3,PLXNA3,NEUROD6,KIRREL3,PPP1R9B
4_Member	GO Biological Processes	GO:0021987	cerebral cortex development	-3.27614	-1.61707	14/110	2018,2737,4763,4915,5649,5802,6091,7101,9289,55970,63950,84687,221692,317762	EMX2,GLI3,NF1,NTRK2,RELN,PTPRS,ROBO1,NR2E1,ADGRG1,GNG12,DMRTA2,PPP1R9B,PHACTR1,CCDC85C
5_Summary	GO Biological Processes	GO:0099504	synaptic vesicle cycle	-12.4828	-9.40262	35/179	320,1813,2054,4983,5579,5582,5728,5874,6517,6623,6854,8447,8674,8773,8927,9066,9342,9829,10675,10814,11069,22829,22999,23025,23413,26059,27445,57030,57502,57706,80331,85439,114781,143425,594855,163,4133,4218,64854,223,477,493,590,2555,2824,3176,3326,3350,4128,6506,6507,6509,7099,9256,9379,10247,26002,29958,55349,60482,80777,121278,3358,7223,9899,51760,1453,2890,9371,54874,55435,56681,83930,84364,…	APBA1,DRD2,STX2,OPHN1,PRKCB,PRKCG,PTEN,RAB27B,SLC2A4,SNCG,SYN2,DOC2B,VAMP4,SNAP23,BSN,SYT7,SNAP29,DNAJC6,CSPG5,CPLX2,RAPGEF4,NLGN4Y,RIMS1,UNC13A,NCS1,ERC2,PCLO,SLC17A7,NLGN4X,DENND1A,DNAJC5,STON2,BTBD9,SYT9,CPLX3,AP2B1,MAP2,RAB8A,USP46,ALDH9A1,ATP1A2,ATP2B4,BCHE,GABRA2,GPM6B,HNMT,HSP90AB1,HTR1A,MAOA,SLC1A2,SLC1A3,SLC1A4,TLR4,TSPOAP1,NRXN2,RIDA,MOXD1,DMGDH,CHDH,SLC5A7,CYB5B,TPH2,HTR2C,TRPC4,SV2B,S…
5_Member	GO Biological Processes	GO:0099504	synaptic vesicle cycle	-12.4828	-9.40262	35/179	320,1813,2054,4983,5579,5582,5728,5874,6517,6623,6854,8447,8674,8773,8927,9066,9342,9829,10675,10814,11069,22829,22999,23025,23413,26059,27445,57030,57502,57706,80331,85439,114781,143425,594855	APBA1,DRD2,STX2,OPHN1,PRKCB,PRKCG,PTEN,RAB27B,SLC2A4,SNCG,SYN2,DOC2B,VAMP4,SNAP23,BSN,SYT7,SNAP29,DNAJC6,CSPG5,CPLX2,RAPGEF4,NLGN4Y,RIMS1,UNC13A,NCS1,ERC2,PCLO,SLC17A7,NLGN4X,DENND1A,DNAJC5,STON2,BTBD9,SYT9,CPLX3
5_Member	GO Biological Processes	GO:0099003	vesicle-mediated transport in synapse	-11.489	-8.49181	35/193	163,320,1813,2054,4133,4218,4983,5579,5582,5874,6517,6623,8447,8674,8773,9066,9342,9829,10675,10814,22829,22999,23025,23413,26059,27445,57030,57502,57706,64854,80331,85439,114781,143425,594855	AP2B1,APBA1,DRD2,STX2,MAP2,RAB8A,OPHN1,PRKCB,PRKCG,RAB27B,SLC2A4,SNCG,DOC2B,VAMP4,SNAP23,SYT7,SNAP29,DNAJC6,CSPG5,CPLX2,NLGN4Y,RIMS1,UNC13A,NCS1,ERC2,PCLO,SLC17A7,NLGN4X,DENND1A,USP46,DNAJC5,STON2,BTBD9,SYT9,CPLX3
5_Member	GO Biological Processes	GO:0001505	regulation of neurotransmitter levels	-9.63561	-6.78363	45/341	223,320,477,493,590,1813,2054,2555,2824,3176,3326,3350,4128,5579,5582,6506,6507,6509,6623,6854,7099,8447,8773,9066,9256,9342,9379,10247,10675,10814,22999,23025,23413,26002,26059,27445,29958,55349,60482,80331,80777,114781,121278,143425,594855	ALDH9A1,APBA1,ATP1A2,ATP2B4,BCHE,DRD2,STX2,GABRA2,GPM6B,HNMT,HSP90AB1,HTR1A,MAOA,PRKCB,PRKCG,SLC1A2,SLC1A3,SLC1A4,SNCG,SYN2,TLR4,DOC2B,SNAP23,SYT7,TSPOAP1,SNAP29,NRXN2,RIDA,CSPG5,CPLX2,RIMS1,UNC13A,NCS1,MOXD1,ERC2,PCLO,DMGDH,CHDH,SLC5A7,DNAJC5,CYB5B,BTBD9,TPH2,SYT9,CPLX3
5_Member	GO Biological Processes	GO:0006836	neurotransmitter transport	-7.78175	-5.10781	35/262	320,477,1813,2054,2555,2824,3350,3358,5579,5582,6506,6507,6509,6623,6854,7223,8447,8773,9066,9256,9342,9379,9899,10675,10814,22999,23025,23413,26059,27445,57030,60482,80331,143425,594855	APBA1,ATP1A2,DRD2,STX2,GABRA2,GPM6B,HTR1A,HTR2C,PRKCB,PRKCG,SLC1A2,SLC1A3,SLC1A4,SNCG,SYN2,TRPC4,DOC2B,SNAP23,SYT7,TSPOAP1,SNAP29,NRXN2,SV2B,CSPG5,CPLX2,RIMS1,UNC13A,NCS1,ERC2,PCLO,SLC17A7,SLC5A7,DNAJC5,SYT9,CPLX3
5_Member	GO Biological Processes	GO:0007269	neurotransmitter secretion	-6.73224	-4.22459	24/155	320,1813,2054,5579,5582,6623,6854,8447,8773,9066,9256,9342,9379,10675,10814,22999,23025,23413,26059,27445,60482,80331,143425,594855	APBA1,DRD2,STX2,PRKCB,PRKCG,SNCG,SYN2,DOC2B,SNAP23,SYT7,TSPOAP1,SNAP29,NRXN2,CSPG5,CPLX2,RIMS1,UNC13A,NCS1,ERC2,PCLO,SLC5A7,DNAJC5,SYT9,CPLX3
5_Member	GO Biological Processes	GO:0099643	signal release from synapse	-6.67881	-4.19497	24/156	320,1813,2054,5579,5582,6623,6854,8447,8773,9066,9256,9342,9379,10675,10814,22999,23025,23413,26059,27445,60482,80331,143425,594855	APBA1,DRD2,STX2,PRKCB,PRKCG,SNCG,SYN2,DOC2B,SNAP23,SYT7,TSPOAP1,SNAP29,NRXN2,CSPG5,CPLX2,RIMS1,UNC13A,NCS1,ERC2,PCLO,SLC5A7,DNAJC5,SYT9,CPLX3
5_Member	GO Biological Processes	GO:0016079	synaptic vesicle exocytosis	-6.59955	-4.13274	19/104	320,1813,2054,5579,5582,8447,8773,9066,9342,10675,10814,22999,23025,23413,26059,27445,80331,143425,594855	APBA1,DRD2,STX2,PRKCB,PRKCG,DOC2B,SNAP23,SYT7,SNAP29,CSPG5,CPLX2,RIMS1,UNC13A,NCS1,ERC2,PCLO,DNAJC5,SYT9,CPLX3
5_Member	GO Biological Processes	GO:0097479	synaptic vesicle localization	-6.50875	-4.07926	23/148	320,1813,2054,4133,5579,5582,5728,6517,6854,8447,8773,9066,9342,10675,10814,22999,23025,23413,26059,27445,80331,143425,594855	APBA1,DRD2,STX2,MAP2,PRKCB,PRKCG,PTEN,SLC2A4,SYN2,DOC2B,SNAP23,SYT7,SNAP29,CSPG5,CPLX2,RIMS1,UNC13A,NCS1,ERC2,PCLO,DNAJC5,SYT9,CPLX3
5_Member	GO Biological Processes	GO:0098693	regulation of synaptic vesicle cycle	-6.46191	-4.04252	18/96	320,1813,5579,5582,5728,6517,8674,8927,10675,10814,11069,22999,23413,57030,80331,114781,143425,594855	APBA1,DRD2,PRKCB,PRKCG,PTEN,SLC2A4,VAMP4,BSN,CSPG5,CPLX2,RAPGEF4,RIMS1,NCS1,SLC17A7,DNAJC5,BTBD9,SYT9,CPLX3
5_Member	GO Biological Processes	GO:0017156	calcium ion regulated exocytosis	-6.45082	-4.0364	22/138	320,1813,2054,5579,5582,6854,8447,8773,9066,9342,10675,10814,11069,22999,23025,23413,26059,27445,51760,80331,143425,594855	APBA1,DRD2,STX2,PRKCB,PRKCG,SYN2,DOC2B,SNAP23,SYT7,SNAP29,CSPG5,CPLX2,RAPGEF4,RIMS1,UNC13A,NCS1,ERC2,PCLO,SYT17,DNAJC5,SYT9,CPLX3
5_Member	GO Biological Processes	GO:0048489	synaptic vesicle transport	-5.79547	-3.50635	21/139	320,1813,2054,4133,5579,5582,6517,8447,8773,9066,9342,10675,10814,22999,23025,23413,26059,27445,80331,143425,594855	APBA1,DRD2,STX2,MAP2,PRKCB,PRKCG,SLC2A4,DOC2B,SNAP23,SYT7,SNAP29,CSPG5,CPLX2,RIMS1,UNC13A,NCS1,ERC2,PCLO,DNAJC5,SYT9,CPLX3
5_Member	GO Biological Processes	GO:0097480	establishment of synaptic vesicle localization	-5.79547	-3.50635	21/139	320,1813,2054,4133,5579,5582,6517,8447,8773,9066,9342,10675,10814,22999,23025,23413,26059,27445,80331,143425,594855	APBA1,DRD2,STX2,MAP2,PRKCB,PRKCG,SLC2A4,DOC2B,SNAP23,SYT7,SNAP29,CSPG5,CPLX2,RIMS1,UNC13A,NCS1,ERC2,PCLO,DNAJC5,SYT9,CPLX3
5_Member	GO Biological Processes	GO:0051648	vesicle localization	-5.42618	-3.24625	34/314	320,1453,1813,2054,2890,4133,5579,5582,5728,5874,6517,6854,8447,8773,9066,9342,9371,10675,10814,22999,23025,23413,26059,27445,54874,55435,56681,80331,83930,84364,90411,122553,143425,594855	APBA1,CSNK1D,DRD2,STX2,GRIA1,MAP2,PRKCB,PRKCG,PTEN,RAB27B,SLC2A4,SYN2,DOC2B,SNAP23,SYT7,SNAP29,KIF3B,CSPG5,CPLX2,RIMS1,UNC13A,NCS1,ERC2,PCLO,FNBP1L,AP1AR,SAR1A,DNAJC5,STARD3NL,ARFGAP2,MCFD2,TRAPPC6B,SYT9,CPLX3
5_Member	GO Biological Processes	GO:0051650	establishment of vesicle localization	-4.98158	-2.89219	32/301	320,1453,1813,2054,2890,4133,5579,5582,5874,6517,8447,8773,9066,9342,9371,10675,10814,22999,23025,23413,26059,27445,54874,55435,56681,80331,83930,84364,90411,122553,143425,594855	APBA1,CSNK1D,DRD2,STX2,GRIA1,MAP2,PRKCB,PRKCG,RAB27B,SLC2A4,DOC2B,SNAP23,SYT7,SNAP29,KIF3B,CSPG5,CPLX2,RIMS1,UNC13A,NCS1,ERC2,PCLO,FNBP1L,AP1AR,SAR1A,DNAJC5,STARD3NL,ARFGAP2,MCFD2,TRAPPC6B,SYT9,CPLX3
5_Member	GO Biological Processes	GO:0060627	regulation of vesicle-mediated transport	-4.73348	-2.71104	47/534	163,320,341,348,408,1813,4133,4218,4983,5579,5582,5594,5728,5795,5869,5872,5874,5898,6517,7422,7430,7879,8447,8674,9066,9495,9829,10461,10675,10814,11069,22999,23317,23413,27445,51760,53407,54550,55423,56681,57030,64854,85439,114781,143425,376267,594855	AP2B1,APBA1,APOC1,APOE,ARRB1,DRD2,MAP2,RAB8A,OPHN1,PRKCB,PRKCG,MAPK1,PTEN,PTPRJ,RAB5B,RAB13,RAB27B,RALA,SLC2A4,VEGFA,EZR,RAB7A,DOC2B,VAMP4,SYT7,AKAP5,DNAJC6,MERTK,CSPG5,CPLX2,RAPGEF4,RIMS1,DNAJC13,NCS1,PCLO,SYT17,STX18,NECAB2,SIRPG,SAR1A,SLC17A7,USP46,STON2,BTBD9,SYT9,RAB15,CPLX3
5_Member	GO Biological Processes	GO:0045055	regulated exocytosis	-4.11023	-2.24129	60/780	1,2,317,320,847,1813,2039,2054,3326,3479,4257,5579,5582,5594,5611,5645,5795,5869,5874,6284,6854,7422,7879,8447,8514,8773,8895,8904,9066,9342,9761,10075,10257,10321,10675,10814,10857,11069,22999,23025,23317,23413,23593,25840,26059,27445,28956,29789,51209,51760,56888,57554,79888,80223,80331,124583,139322,143425,376267,594855	A1BG,A2M,APAF1,APBA1,CAT,DRD2,DMTN,STX2,HSP90AB1,IGF1,MGST1,PRKCB,PRKCG,MAPK1,DNAJC3,PRSS2,PTPRJ,RAB5B,RAB27B,S100A13,SYN2,VEGFA,RAB7A,DOC2B,KCNAB2,SNAP23,CPNE3,CPNE1,SYT7,SNAP29,MLEC,HUWE1,ABCC4,CRISP3,CSPG5,CPLX2,PGRMC1,RAPGEF4,RIMS1,UNC13A,DNAJC13,NCS1,HEBP2,METTL7A,ERC2,PCLO,LAMTOR2,OLA1,RAB9B,SYT17,KCMF1,LRRC7,LPCAT1,RAB11FIP1,DNAJC5,CANT1,APOOL,SYT9,RAB15,CPLX3
5_Member	GO Biological Processes	GO:1902803	regulation of synaptic vesicle transport	-3.99047	-2.14611	12/72	320,1813,4133,5579,5582,6517,10675,10814,22999,23413,143425,594855	APBA1,DRD2,MAP2,PRKCB,PRKCG,SLC2A4,CSPG5,CPLX2,RIMS1,NCS1,SYT9,CPLX3
5_Member	GO Biological Processes	GO:0051656	establishment of organelle localization	-3.66642	-1.90411	43/526	320,1060,1453,1813,2054,2697,2890,3797,4133,5579,5582,5819,5874,6284,6517,6585,7430,8447,8773,9066,9342,9371,10675,10814,22999,23025,23413,26059,27445,51134,54874,55435,56288,56681,80331,83930,84364,85440,90411,122553,143425,150465,594855	APBA1,CENPC,CSNK1D,DRD2,STX2,GJA1,GRIA1,KIF3C,MAP2,PRKCB,PRKCG,NECTIN2,RAB27B,S100A13,SLC2A4,SLIT1,EZR,DOC2B,SNAP23,SYT7,SNAP29,KIF3B,CSPG5,CPLX2,RIMS1,UNC13A,NCS1,ERC2,PCLO,CEP83,FNBP1L,AP1AR,PARD3,SAR1A,DNAJC5,STARD3NL,ARFGAP2,DOCK7,MCFD2,TRAPPC6B,SYT9,TTL,CPLX3
5_Member	GO Biological Processes	GO:0051640	organelle localization	-3.41874	-1.71975	54/725	320,1060,1453,1813,2054,2697,2890,3797,4133,4218,5579,5582,5728,5819,5872,5874,6284,6517,6585,6854,7430,8417,8447,8773,9066,9342,9371,10675,10814,22981,22999,23025,23413,26059,27445,51134,51199,54874,55014,55435,56288,56681,80331,83930,84364,84902,85440,90410,90411,122553,143425,150465,376267,594855	APBA1,CENPC,CSNK1D,DRD2,STX2,GJA1,GRIA1,KIF3C,MAP2,RAB8A,PRKCB,PRKCG,PTEN,NECTIN2,RAB13,RAB27B,S100A13,SLC2A4,SLIT1,SYN2,EZR,STX7,DOC2B,SNAP23,SYT7,SNAP29,KIF3B,CSPG5,CPLX2,NINL,RIMS1,UNC13A,NCS1,ERC2,PCLO,CEP83,NIN,FNBP1L,STX17,AP1AR,PARD3,SAR1A,DNAJC5,STARD3NL,ARFGAP2,CEP89,DOCK7,IFT20,MCFD2,TRAPPC6B,SYT9,TTL,RAB15,CPLX3
5_Member	GO Biological Processes	GO:0017158	regulation of calcium ion-dependent exocytosis	-3.21322	-1.56696	13/99	320,1813,5579,5582,8447,9066,10675,10814,22999,23413,51760,143425,594855	APBA1,DRD2,PRKCB,PRKCG,DOC2B,SYT7,CSPG5,CPLX2,RIMS1,NCS1,SYT17,SYT9,CPLX3
5_Member	GO Biological Processes	GO:0017157	regulation of exocytosis	-3.18757	-1.55376	21/208	320,1813,4218,5579,5582,5872,5874,5898,7879,8447,9066,10675,10814,11069,22999,23413,27445,51760,143425,376267,594855	APBA1,DRD2,RAB8A,PRKCB,PRKCG,RAB13,RAB27B,RALA,RAB7A,DOC2B,SYT7,CSPG5,CPLX2,RAPGEF4,RIMS1,NCS1,PCLO,SYT17,SYT9,RAB15,CPLX3
5_Member	GO Biological Processes	GO:0051588	regulation of neurotransmitter transport	-3.08534	-1.47384	15/128	320,477,1813,2824,3350,3358,5579,5582,6623,10675,10814,22999,23413,143425,594855	APBA1,ATP1A2,DRD2,GPM6B,HTR1A,HTR2C,PRKCB,PRKCG,SNCG,CSPG5,CPLX2,RIMS1,NCS1,SYT9,CPLX3
5_Member	GO Biological Processes	GO:2000300	regulation of synaptic vesicle exocytosis	-3.08067	-1.4703	10/66	320,1813,5579,5582,10675,10814,22999,23413,143425,594855	APBA1,DRD2,PRKCB,PRKCG,CSPG5,CPLX2,RIMS1,NCS1,SYT9,CPLX3
5_Member	GO Biological Processes	GO:0046928	regulation of neurotransmitter secretion	-2.55278	-1.09223	11/90	320,1813,5579,5582,6623,10675,10814,22999,23413,143425,594855	APBA1,DRD2,PRKCB,PRKCG,SNCG,CSPG5,CPLX2,RIMS1,NCS1,SYT9,CPLX3
5_Member	GO Biological Processes	GO:1903305	regulation of regulated secretory pathway	-2.06959	-0.746114	14/148	320,1813,5579,5582,8447,9066,10675,10814,22999,23413,51760,143425,376267,594855	APBA1,DRD2,PRKCB,PRKCG,DOC2B,SYT7,CSPG5,CPLX2,RIMS1,NCS1,SYT17,SYT9,RAB15,CPLX3
6_Summary	GO Biological Processes	GO:0050808	synapse organization	-11.8772	-8.81928	55/411	348,1007,1501,1607,1813,1948,2066,2239,2534,2555,2562,2904,2915,4038,4204,4628,4915,4983,5021,5064,5098,5457,5649,5728,5792,5802,6092,6585,6623,7143,7336,8321,8831,8927,9379,10152,10611,22829,22941,23025,23184,26059,27445,54434,55752,57502,57633,58489,80823,84623,84631,94030,266727,347730,388336,57030	APOE,CDH9,CTNND2,DGKB,DRD2,EFNB2,ERBB4,GPC4,FYN,GABRA2,GABRB3,GRIN2B,GRM5,LRP4,MECP2,MYH10,NTRK2,OPHN1,OXTR,PALM,PCDHGC3,POU4F1,RELN,PTEN,PTPRF,PTPRS,ROBO2,SLIT1,SNCG,TNR,UBE2V2,FZD1,SYNGAP1,BSN,NRXN2,ABI2,PDLIM5,NLGN4Y,SHANK2,UNC13A,MESD,ERC2,PCLO,SSH1,SEPTIN11,NLGN4X,LRRN1,ABHD17C,BHLHB9,KIRREL3,SLITRK2,LRRC4B,MDGA1,LRRTM1,SHISA6,SLC17A7
6_Member	GO Biological Processes	GO:0050808	synapse organization	-11.8772	-8.81928	55/411	348,1007,1501,1607,1813,1948,2066,2239,2534,2555,2562,2904,2915,4038,4204,4628,4915,4983,5021,5064,5098,5457,5649,5728,5792,5802,6092,6585,6623,7143,7336,8321,8831,8927,9379,10152,10611,22829,22941,23025,23184,26059,27445,54434,55752,57502,57633,58489,80823,84623,84631,94030,266727,347730,388336	APOE,CDH9,CTNND2,DGKB,DRD2,EFNB2,ERBB4,GPC4,FYN,GABRA2,GABRB3,GRIN2B,GRM5,LRP4,MECP2,MYH10,NTRK2,OPHN1,OXTR,PALM,PCDHGC3,POU4F1,RELN,PTEN,PTPRF,PTPRS,ROBO2,SLIT1,SNCG,TNR,UBE2V2,FZD1,SYNGAP1,BSN,NRXN2,ABI2,PDLIM5,NLGN4Y,SHANK2,UNC13A,MESD,ERC2,PCLO,SSH1,SEPTIN11,NLGN4X,LRRN1,ABHD17C,BHLHB9,KIRREL3,SLITRK2,LRRC4B,MDGA1,LRRTM1,SHISA6
6_Member	GO Biological Processes	GO:0007416	synapse assembly	-10.7996	-7.83864	32/173	1007,1813,1948,2066,2239,2555,2562,4038,4204,4915,5021,5457,5728,5802,6092,6585,7336,8321,8927,9379,10611,22829,22941,27445,57502,57633,80823,84623,84631,94030,266727,347730	CDH9,DRD2,EFNB2,ERBB4,GPC4,GABRA2,GABRB3,LRP4,MECP2,NTRK2,OXTR,POU4F1,PTEN,PTPRS,ROBO2,SLIT1,UBE2V2,FZD1,BSN,NRXN2,PDLIM5,NLGN4Y,SHANK2,PCLO,NLGN4X,LRRN1,BHLHB9,KIRREL3,SLITRK2,LRRC4B,MDGA1,LRRTM1
6_Member	GO Biological Processes	GO:0099054	presynapse assembly	-6.89361	-4.34762	13/47	1948,2239,4038,5728,8321,8927,22829,27445,57502,84631,94030,266727,347730	EFNB2,GPC4,LRP4,PTEN,FZD1,BSN,NLGN4Y,PCLO,NLGN4X,SLITRK2,LRRC4B,MDGA1,LRRTM1
6_Member	GO Biological Processes	GO:0050803	regulation of synapse structure or activity	-6.83494	-4.30854	30/223	348,1607,1813,2239,2534,2904,4038,4915,5021,5649,5728,5802,6092,6585,7336,8831,10152,10611,23184,54434,55752,57030,57633,58489,80823,84631,94030,266727,347730,388336	APOE,DGKB,DRD2,GPC4,FYN,GRIN2B,LRP4,NTRK2,OXTR,RELN,PTEN,PTPRS,ROBO2,SLIT1,UBE2V2,SYNGAP1,ABI2,PDLIM5,MESD,SSH1,SEPTIN11,SLC17A7,LRRN1,ABHD17C,BHLHB9,SLITRK2,LRRC4B,MDGA1,LRRTM1,SHISA6
6_Member	GO Biological Processes	GO:0099172	presynapse organization	-6.5477	-4.11307	13/50	1948,2239,4038,5728,8321,8927,22829,27445,57502,84631,94030,266727,347730	EFNB2,GPC4,LRP4,PTEN,FZD1,BSN,NLGN4Y,PCLO,NLGN4X,SLITRK2,LRRC4B,MDGA1,LRRTM1
6_Member	GO Biological Processes	GO:0099173	postsynapse organization	-6.41905	-4.01439	24/161	348,1501,1607,2534,2904,4038,4983,5649,5728,5802,8831,9379,10152,10611,22829,22941,23184,54434,57502,58489,80823,94030,347730,388336	APOE,CTNND2,DGKB,FYN,GRIN2B,LRP4,OPHN1,RELN,PTEN,PTPRS,SYNGAP1,NRXN2,ABI2,PDLIM5,NLGN4Y,SHANK2,MESD,SSH1,NLGN4X,ABHD17C,BHLHB9,LRRC4B,LRRTM1,SHISA6
6_Member	GO Biological Processes	GO:0050807	regulation of synapse organization	-6.21681	-3.84913	28/213	348,1607,1813,2239,2534,2904,4038,4915,5021,5649,5728,5802,6092,6585,7336,10152,10611,23184,54434,55752,57633,58489,80823,84631,94030,266727,347730,388336	APOE,DGKB,DRD2,GPC4,FYN,GRIN2B,LRP4,NTRK2,OXTR,RELN,PTEN,PTPRS,ROBO2,SLIT1,UBE2V2,ABI2,PDLIM5,MESD,SSH1,SEPTIN11,LRRN1,ABHD17C,BHLHB9,SLITRK2,LRRC4B,MDGA1,LRRTM1,SHISA6
6_Member	GO Biological Processes	GO:0099175	regulation of postsynapse organization	-5.58448	-3.35911	17/99	348,1607,2534,2904,4038,5649,5728,5802,10152,10611,23184,54434,58489,80823,94030,347730,388336	APOE,DGKB,FYN,GRIN2B,LRP4,RELN,PTEN,PTPRS,ABI2,PDLIM5,MESD,SSH1,ABHD17C,BHLHB9,LRRC4B,LRRTM1,SHISA6
6_Member	GO Biological Processes	GO:0051963	regulation of synapse assembly	-3.90237	-2.08753	14/96	2239,4915,5021,5802,6092,6585,7336,10611,57633,80823,84631,94030,266727,347730	GPC4,NTRK2,OXTR,PTPRS,ROBO2,SLIT1,UBE2V2,PDLIM5,LRRN1,BHLHB9,SLITRK2,LRRC4B,MDGA1,LRRTM1
7_Summary	GO Biological Processes	GO:0021953	central nervous system neuron differentiation	-10.3284	-7.38447	32/180	1453,1630,1813,2066,2560,2637,2737,2909,3326,4133,4781,4915,4983,5457,5728,6091,6092,6585,6586,6659,7101,8321,8861,9334,23440,51199,55558,89884,266727,340719,374946,388585	CSNK1D,DCC,DRD2,ERBB4,GABRB1,GBX2,GLI3,ARHGAP35,HSP90AB1,MAP2,NFIB,NTRK2,OPHN1,POU4F1,PTEN,ROBO1,ROBO2,SLIT1,SLIT3,SOX4,NR2E1,FZD1,LDB1,B4GALT5,OTP,NIN,PLXNA3,LHX4,MDGA1,NANOS1,DRAXIN,HES5
7_Member	GO Biological Processes	GO:0021953	central nervous system neuron differentiation	-10.3284	-7.38447	32/180	1453,1630,1813,2066,2560,2637,2737,2909,3326,4133,4781,4915,4983,5457,5728,6091,6092,6585,6586,6659,7101,8321,8861,9334,23440,51199,55558,89884,266727,340719,374946,388585	CSNK1D,DCC,DRD2,ERBB4,GABRB1,GBX2,GLI3,ARHGAP35,HSP90AB1,MAP2,NFIB,NTRK2,OPHN1,POU4F1,PTEN,ROBO1,ROBO2,SLIT1,SLIT3,SOX4,NR2E1,FZD1,LDB1,B4GALT5,OTP,NIN,PLXNA3,LHX4,MDGA1,NANOS1,DRAXIN,HES5
7_Member	GO Biological Processes	GO:0021954	central nervous system neuron development	-9.09239	-6.27755	20/83	1630,1813,2560,2637,2909,3326,4133,4781,4915,5728,6091,6092,6585,6586,7101,9334,51199,55558,340719,374946	DCC,DRD2,GABRB1,GBX2,ARHGAP35,HSP90AB1,MAP2,NFIB,NTRK2,PTEN,ROBO1,ROBO2,SLIT1,SLIT3,NR2E1,B4GALT5,NIN,PLXNA3,NANOS1,DRAXIN
7_Member	GO Biological Processes	GO:0021955	central nervous system neuron axonogenesis	-4.66716	-2.65844	9/35	1630,2909,3326,4781,5728,7101,9334,51199,374946	DCC,ARHGAP35,HSP90AB1,NFIB,PTEN,NR2E1,B4GALT5,NIN,DRAXIN
7_Member	GO Biological Processes	GO:0021960	anterior commissure morphogenesis	-2.75633	-1.24004	3/6	4781,7101,374946	NFIB,NR2E1,DRAXIN
7_Member	GO Biological Processes	GO:0021952	central nervous system projection neuron axonogenesis	-2.22101	-0.847535	5/26	1630,4781,7101,51199,374946	DCC,NFIB,NR2E1,NIN,DRAXIN
8_Summary	Reactome Gene Sets	R-HSA-6794362	Protein-protein interactions at synapses	-8.80004	-5.99744	20/86	320,1740,2037,2890,2904,2905,2915,5792,5802,9066,9379,10611,22829,22941,57502,57596,84631,94030,143425,347730,4038,5728,4983,8831	APBA1,DLG2,EPB41L2,GRIA1,GRIN2B,GRIN2C,GRM5,PTPRF,PTPRS,SYT7,NRXN2,PDLIM5,NLGN4Y,SHANK2,NLGN4X,BEGAIN,SLITRK2,LRRC4B,SYT9,LRRTM1,LRP4,PTEN,OPHN1,SYNGAP1
8_Member	Reactome Gene Sets	R-HSA-6794362	Protein-protein interactions at synapses	-8.80004	-5.99744	20/86	320,1740,2037,2890,2904,2905,2915,5792,5802,9066,9379,10611,22829,22941,57502,57596,84631,94030,143425,347730	APBA1,DLG2,EPB41L2,GRIA1,GRIN2B,GRIN2C,GRM5,PTPRF,PTPRS,SYT7,NRXN2,PDLIM5,NLGN4Y,SHANK2,NLGN4X,BEGAIN,SLITRK2,LRRC4B,SYT9,LRRTM1
8_Member	Reactome Gene Sets	R-HSA-6794361	Neurexins and neuroligins	-7.76774	-5.10781	15/55	320,1740,2037,2904,2905,2915,9066,9379,10611,22829,22941,57502,57596,143425,347730	APBA1,DLG2,EPB41L2,GRIN2B,GRIN2C,GRM5,SYT7,NRXN2,PDLIM5,NLGN4Y,SHANK2,NLGN4X,BEGAIN,SYT9,LRRTM1
8_Member	GO Biological Processes	GO:0099068	postsynapse assembly	-5.27013	-3.14168	9/30	4038,5728,5802,9379,22829,22941,57502,94030,347730	LRP4,PTEN,PTPRS,NRXN2,NLGN4Y,SHANK2,NLGN4X,LRRC4B,LRRTM1
8_Member	GO Biological Processes	GO:0097106	postsynaptic density organization	-4.44858	-2.48935	8/29	4983,5728,5802,8831,9379,22941,94030,347730	OPHN1,PTEN,PTPRS,SYNGAP1,NRXN2,SHANK2,LRRC4B,LRRTM1
8_Member	GO Biological Processes	GO:0099084	postsynaptic specialization organization	-4.21989	-2.32188	8/31	4983,5728,5802,8831,9379,22941,94030,347730	OPHN1,PTEN,PTPRS,SYNGAP1,NRXN2,SHANK2,LRRC4B,LRRTM1
8_Member	GO Biological Processes	GO:0097107	postsynaptic density assembly	-3.96567	-2.12396	6/18	5728,5802,9379,22941,94030,347730	PTEN,PTPRS,NRXN2,SHANK2,LRRC4B,LRRTM1
8_Member	GO Biological Processes	GO:0098698	postsynaptic specialization assembly	-3.55144	-1.81888	6/21	5728,5802,9379,22941,94030,347730	PTEN,PTPRS,NRXN2,SHANK2,LRRC4B,LRRTM1
8_Member	GO Biological Processes	GO:1904861	excitatory synapse assembly	-3.00949	-1.41922	6/26	5728,5802,9379,22941,94030,347730	PTEN,PTPRS,NRXN2,SHANK2,LRRC4B,LRRTM1
8_Member	GO Biological Processes	GO:0099151	regulation of postsynaptic density assembly	-2.03841	-0.729499	3/10	5802,94030,347730	PTPRS,LRRC4B,LRRTM1
9_Summary	GO Biological Processes	GO:0042391	regulation of membrane potential	-8.65849	-5.90165	50/431	287,477,482,596,781,817,1813,1824,2273,2555,2556,2558,2560,2562,2565,2697,2742,2767,2776,2890,2897,2898,2904,2905,2915,4204,4544,4878,4915,5348,5649,5728,6328,8001,8514,8671,8838,22941,22999,23530,23593,23620,23704,54434,55022,55800,56853,57502,90134,401190,348,794,1979,4218,5594,7101,7143,8831,9066,9495,10814,11170,22986,57338,388336,5021,143425,152,1910,3358,4885,56288,57596,134145,590	ANK2,ATP1A2,ATP1B2,BCL2,CACNA2D1,CAMK2D,DRD2,DSC2,FHL1,GABRA2,GABRA3,GABRA5,GABRB1,GABRB3,GABRG1,GJA1,GLRA2,GNA11,GNAQ,GRIA1,GRIK1,GRIK2,GRIN2B,GRIN2C,GRM5,MECP2,MTNR1B,NPPA,NTRK2,FXYD1,RELN,PTEN,SCN3A,GLRA3,KCNAB2,SLC4A4,CCN6,SHANK2,RIMS1,NNT,HEBP2,NTSR2,KCNE4,SSH1,PID1,SCN3B,CELF4,NLGN4X,KCNH7,RGS7BP,APOE,CALB2,EIF4EBP2,RAB8A,MAPK1,NR2E1,TNR,SYNGAP1,SYT7,AKAP5,CPLX2,FAM107A,SORCS3,JPH3,SHISA6,O…
9_Member	GO Biological Processes	GO:0042391	regulation of membrane potential	-8.65849	-5.90165	50/431	287,477,482,596,781,817,1813,1824,2273,2555,2556,2558,2560,2562,2565,2697,2742,2767,2776,2890,2897,2898,2904,2905,2915,4204,4544,4878,4915,5348,5649,5728,6328,8001,8514,8671,8838,22941,22999,23530,23593,23620,23704,54434,55022,55800,56853,57502,90134,401190	ANK2,ATP1A2,ATP1B2,BCL2,CACNA2D1,CAMK2D,DRD2,DSC2,FHL1,GABRA2,GABRA3,GABRA5,GABRB1,GABRB3,GABRG1,GJA1,GLRA2,GNA11,GNAQ,GRIA1,GRIK1,GRIK2,GRIN2B,GRIN2C,GRM5,MECP2,MTNR1B,NPPA,NTRK2,FXYD1,RELN,PTEN,SCN3A,GLRA3,KCNAB2,SLC4A4,CCN6,SHANK2,RIMS1,NNT,HEBP2,NTSR2,KCNE4,SSH1,PID1,SCN3B,CELF4,NLGN4X,KCNH7,RGS7BP
9_Member	GO Biological Processes	GO:0048167	regulation of synaptic plasticity	-8.1183	-5.40285	28/174	348,794,1813,1979,2890,2898,2904,2905,2915,4204,4218,4915,5594,5649,5728,7101,7143,8831,9066,9495,10814,11170,22941,22986,22999,54434,57338,388336	APOE,CALB2,DRD2,EIF4EBP2,GRIA1,GRIK2,GRIN2B,GRIN2C,GRM5,MECP2,RAB8A,NTRK2,MAPK1,RELN,PTEN,NR2E1,TNR,SYNGAP1,SYT7,AKAP5,CPLX2,FAM107A,SHANK2,SORCS3,RIMS1,SSH1,JPH3,SHISA6
9_Member	GO Biological Processes	GO:0060078	regulation of postsynaptic membrane potential	-7.19752	-4.60947	23/136	1813,2555,2556,2558,2560,2565,2742,2890,2897,2898,2904,2905,2915,4204,5649,5728,8001,22941,22999,54434,56853,57502,401190	DRD2,GABRA2,GABRA3,GABRA5,GABRB1,GABRG1,GLRA2,GRIA1,GRIK1,GRIK2,GRIN2B,GRIN2C,GRM5,MECP2,RELN,PTEN,GLRA3,SHANK2,RIMS1,SSH1,CELF4,NLGN4X,RGS7BP
9_Member	GO Biological Processes	GO:0060291	long-term synaptic potentiation	-5.28366	-3.15007	15/83	348,794,1813,2904,2905,4204,4915,5594,5649,5728,7101,7143,9495,11170,22941	APOE,CALB2,DRD2,GRIN2B,GRIN2C,MECP2,NTRK2,MAPK1,RELN,PTEN,NR2E1,TNR,AKAP5,FAM107A,SHANK2
9_Member	GO Biological Processes	GO:0050806	positive regulation of synaptic transmission	-4.38764	-2.4467	20/158	348,794,1813,2898,2904,2905,4204,4915,5021,5594,5649,5728,7101,7143,9495,11170,22941,22999,54434,143425	APOE,CALB2,DRD2,GRIK2,GRIN2B,GRIN2C,MECP2,NTRK2,OXTR,MAPK1,RELN,PTEN,NR2E1,TNR,AKAP5,FAM107A,SHANK2,RIMS1,SSH1,SYT9
9_Member	GO Biological Processes	GO:0031644	regulation of neurological system process	-3.71626	-1.94073	17/137	152,1910,3358,4544,4885,5649,5728,7143,22941,22999,54434,56288,56853,57502,57596,134145,388336	ADRA2C,EDNRB,HTR2C,MTNR1B,NPTX2,RELN,PTEN,TNR,SHANK2,RIMS1,SSH1,PARD3,CELF4,NLGN4X,BEGAIN,ATPSCKMT,SHISA6
9_Member	GO Biological Processes	GO:0060079	excitatory postsynaptic potential	-3.71011	-1.94004	14/100	1813,2742,2898,2904,2905,4204,5649,5728,8001,22941,22999,54434,56853,57502	DRD2,GLRA2,GRIK2,GRIN2B,GRIN2C,MECP2,RELN,PTEN,GLRA3,SHANK2,RIMS1,SSH1,CELF4,NLGN4X
9_Member	GO Biological Processes	GO:0099565	chemical synaptic transmission, postsynaptic	-3.48531	-1.76589	14/105	1813,2742,2898,2904,2905,4204,5649,5728,8001,22941,22999,54434,56853,57502	DRD2,GLRA2,GRIK2,GRIN2B,GRIN2C,MECP2,RELN,PTEN,GLRA3,SHANK2,RIMS1,SSH1,CELF4,NLGN4X
9_Member	GO Biological Processes	GO:0050805	negative regulation of synaptic transmission	-3.02847	-1.43224	10/67	590,1813,2890,2898,5728,7143,22941,22986,56853,57502	BCHE,DRD2,GRIA1,GRIK2,PTEN,TNR,SHANK2,SORCS3,CELF4,NLGN4X
9_Member	GO Biological Processes	GO:0031646	positive regulation of neurological system process	-2.9012	-1.33955	9/58	4544,5649,5728,7143,22941,22999,54434,56288,134145	MTNR1B,RELN,PTEN,TNR,SHANK2,RIMS1,SSH1,PARD3,ATPSCKMT
9_Member	GO Biological Processes	GO:0098815	modulation of excitatory postsynaptic potential	-2.43071	-1.00529	7/44	5649,5728,22941,22999,54434,56853,57502	RELN,PTEN,SHANK2,RIMS1,SSH1,CELF4,NLGN4X
9_Member	GO Biological Processes	GO:2000463	positive regulation of excitatory postsynaptic potential	-2.14856	-0.799956	5/27	5649,5728,22941,22999,54434	RELN,PTEN,SHANK2,RIMS1,SSH1
10_Summary	WikiPathways	WP706	Sudden Infant Death Syndrome (SIDS) Susceptibility Pathways	-8.31	-5.57434	27/160	117,361,1374,1390,2697,3032,3350,4128,4133,4150,4204,4602,4915,5316,5452,6507,6657,6711,6751,6752,7068,7184,7422,7529,55800,121278,388585	ADCYAP1R1,AQP4,CPT1A,CREM,GJA1,HADHB,HTR1A,MAOA,MAP2,MAZ,MECP2,MYB,NTRK2,PKNOX1,POU2F2,SLC1A3,SOX2,SPTBN1,SSTR1,SSTR2,THRB,HSP90B1,VEGFA,YWHAB,SCN3B,TPH2,HES5
10_Member	WikiPathways	WP706	Sudden Infant Death Syndrome (SIDS) Susceptibility Pathways	-8.31	-5.57434	27/160	117,361,1374,1390,2697,3032,3350,4128,4133,4150,4204,4602,4915,5316,5452,6507,6657,6711,6751,6752,7068,7184,7422,7529,55800,121278,388585	ADCYAP1R1,AQP4,CPT1A,CREM,GJA1,HADHB,HTR1A,MAOA,MAP2,MAZ,MECP2,MYB,NTRK2,PKNOX1,POU2F2,SLC1A3,SOX2,SPTBN1,SSTR1,SSTR2,THRB,HSP90B1,VEGFA,YWHAB,SCN3B,TPH2,HES5
11_Summary	KEGG Pathway	ko04724	Glutamatergic synapse	-7.99142	-5.28572	22/114	2775,2776,2790,2890,2897,2898,2904,2905,2915,2918,3709,5330,5534,5579,5582,5594,6506,6507,8681,22941,55970,57030,2767,3479,5516,340719,1557,2560,2562,3350,3358,3360,4128,121278,493,814,817,1910,2066,2774,5021,5156,5255,5733,7134,89869,596,2534,5296,9132,60482,1002,1007,2261,4087,4915,7003,7010,28316,1453,1813,2697,347733,117,4544,183,477,482,4878,5138,5443,5173,408,7225,11214,163,7421,9365,5522,9…	GNAO1,GNAQ,GNG10,GRIA1,GRIK1,GRIK2,GRIN2B,GRIN2C,GRM5,GRM8,ITPR2,PLCB2,PPP3R1,PRKCB,PRKCG,MAPK1,SLC1A2,SLC1A3,JMJD7-PLA2G4B,SHANK2,GNG12,SLC17A7,GNA11,IGF1,PPP2CB,NANOS1,CYP2C19,GABRB1,GABRB3,HTR1A,HTR2C,HTR4,MAOA,TPH2,ATP2B4,CAMK4,CAMK2D,EDNRB,ERBB4,GNAL,OXTR,PDGFRA,PHKA1,PTGER3,TNNC1,PLCZ1,BCL2,FYN,PIK3R2,KCNQ4,SLC5A7,CDH4,CDH9,FGFR3,SMAD2,NTRK2,TEAD1,TEK,CDH20,CSNK1D,DRD2,GJA1,TUBB2B,ADCYAP1R1…
11_Member	KEGG Pathway	ko04724	Glutamatergic synapse	-7.99142	-5.28572	22/114	2775,2776,2790,2890,2897,2898,2904,2905,2915,2918,3709,5330,5534,5579,5582,5594,6506,6507,8681,22941,55970,57030	GNAO1,GNAQ,GNG10,GRIA1,GRIK1,GRIK2,GRIN2B,GRIN2C,GRM5,GRM8,ITPR2,PLCB2,PPP3R1,PRKCB,PRKCG,MAPK1,SLC1A2,SLC1A3,JMJD7-PLA2G4B,SHANK2,GNG12,SLC17A7
11_Member	KEGG Pathway	hsa04724	Glutamatergic synapse	-7.77473	-5.10781	22/117	2775,2776,2790,2890,2897,2898,2904,2905,2915,2918,3709,5330,5534,5579,5582,5594,6506,6507,8681,22941,55970,57030	GNAO1,GNAQ,GNG10,GRIA1,GRIK1,GRIK2,GRIN2B,GRIN2C,GRM5,GRM8,ITPR2,PLCB2,PPP3R1,PRKCB,PRKCG,MAPK1,SLC1A2,SLC1A3,JMJD7-PLA2G4B,SHANK2,GNG12,SLC17A7
11_Member	KEGG Pathway	hsa04730	Long-term depression	-5.40151	-3.22912	13/62	2767,2775,2776,2890,3479,3709,5330,5516,5579,5582,5594,8681,340719	GNA11,GNAO1,GNAQ,GRIA1,IGF1,ITPR2,PLCB2,PPP2CB,PRKCB,PRKCG,MAPK1,JMJD7-PLA2G4B,NANOS1
11_Member	KEGG Pathway	hsa04726	Serotonergic synapse	-5.06697	-2.96092	18/119	1557,2560,2562,2775,2776,2790,3350,3358,3360,3709,4128,5330,5579,5582,5594,8681,55970,121278	CYP2C19,GABRB1,GABRB3,GNAO1,GNAQ,GNG10,HTR1A,HTR2C,HTR4,ITPR2,MAOA,PLCB2,PRKCB,PRKCG,MAPK1,JMJD7-PLA2G4B,GNG12,TPH2
11_Member	KEGG Pathway	ko04020	Calcium signaling pathway	-4.93825	-2.8535	23/182	493,814,817,1910,2066,2767,2774,2776,2905,2915,3358,3360,3709,5021,5156,5255,5330,5534,5579,5582,5733,7134,89869	ATP2B4,CAMK4,CAMK2D,EDNRB,ERBB4,GNA11,GNAL,GNAQ,GRIN2C,GRM5,HTR2C,HTR4,ITPR2,OXTR,PDGFRA,PHKA1,PLCB2,PPP3R1,PRKCB,PRKCG,PTGER3,TNNC1,PLCZ1
11_Member	KEGG Pathway	ko04730	Long-term depression	-4.81011	-2.76927	12/60	2767,2775,2776,2890,3479,3709,5330,5516,5579,5582,5594,8681	GNA11,GNAO1,GNAQ,GRIA1,IGF1,ITPR2,PLCB2,PPP2CB,PRKCB,PRKCG,MAPK1,JMJD7-PLA2G4B
11_Member	KEGG Pathway	hsa04725	Cholinergic synapse	-4.68675	-2.67223	17/115	596,814,817,2534,2767,2775,2776,2790,3709,5296,5330,5579,5582,5594,9132,55970,60482	BCL2,CAMK4,CAMK2D,FYN,GNA11,GNAO1,GNAQ,GNG10,ITPR2,PIK3R2,PLCB2,PRKCB,PRKCG,MAPK1,KCNQ4,GNG12,SLC5A7
11_Member	KEGG Pathway	hsa04020	Calcium signaling pathway	-4.53003	-2.55494	24/206	493,814,817,1910,2066,2767,2774,2776,2905,2915,3358,3360,3709,5021,5156,5255,5330,5534,5579,5582,5733,7134,89869,340719	ATP2B4,CAMK4,CAMK2D,EDNRB,ERBB4,GNA11,GNAL,GNAQ,GRIN2C,GRM5,HTR2C,HTR4,ITPR2,OXTR,PDGFRA,PHKA1,PLCB2,PPP3R1,PRKCB,PRKCG,PTGER3,TNNC1,PLCZ1,NANOS1
11_Member	WikiPathways	WP4540	Pathways Regulating Hippo Signaling	-4.3873	-2.4467	15/98	1002,1007,2261,2767,2774,2776,4087,4915,5156,5330,5579,5582,7003,7010,28316	CDH4,CDH9,FGFR3,GNA11,GNAL,GNAQ,SMAD2,NTRK2,PDGFRA,PLCB2,PRKCB,PRKCG,TEAD1,TEK,CDH20
11_Member	KEGG Pathway	ko04540	Gap junction	-4.32451	-2.40335	14/88	1453,1813,2697,2767,2776,2915,3358,3709,5156,5330,5579,5582,5594,347733	CSNK1D,DRD2,GJA1,GNA11,GNAQ,GRM5,HTR2C,ITPR2,PDGFRA,PLCB2,PRKCB,PRKCG,MAPK1,TUBB2B
11_Member	KEGG Pathway	hsa04713	circadian entrainment	-4.28266	-2.37091	15/100	117,817,2775,2776,2790,2890,2904,2905,4544,5330,5579,5582,5594,55970,340719	ADCYAP1R1,CAMK2D,GNAO1,GNAQ,GNG10,GRIA1,GRIN2B,GRIN2C,MTNR1B,PLCB2,PRKCB,PRKCG,MAPK1,GNG12,NANOS1
11_Member	KEGG Pathway	hsa04540	Gap junction	-4.21389	-2.3215	14/90	1453,1813,2697,2767,2776,2915,3358,3709,5156,5330,5579,5582,5594,347733	CSNK1D,DRD2,GJA1,GNA11,GNAQ,GRM5,HTR2C,ITPR2,PDGFRA,PLCB2,PRKCB,PRKCG,MAPK1,TUBB2B
11_Member	KEGG Pathway	hsa04925	aldosterone synthesis and secretion	-4.18103	-2.29488	15/102	183,477,482,493,814,817,2767,2776,3709,4878,5138,5330,5443,5579,5582	AGT,ATP1A2,ATP1B2,ATP2B4,CAMK4,CAMK2D,GNA11,GNAQ,ITPR2,NPPA,PDE2A,PLCB2,POMC,PRKCB,PRKCG
11_Member	Reactome Gene Sets	R-HSA-111885	Opioid Signalling	-4.10677	-2.23923	14/92	814,817,2774,2775,2790,3709,5173,5330,5443,5516,5534,5582,5594,55970	CAMK4,CAMK2D,GNAL,GNAO1,GNG10,ITPR2,PDYN,PLCB2,POMC,PPP2CB,PPP3R1,PRKCG,MAPK1,GNG12
11_Member	Canonical Pathways	M238	PID THROMBIN PAR1 PATHWAY	-3.90884	-2.09027	9/43	408,2767,2775,2776,5330,5579,5582,7225,11214	ARRB1,GNA11,GNAO1,GNAQ,PLCB2,PRKCB,PRKCG,TRPC6,AKAP13
11_Member	KEGG Pathway	ko04961	Endocrine and other factor-regulated calcium reabsorption	-3.59748	-1.85203	9/47	163,477,482,2776,5330,5579,5582,7421,9365	AP2B1,ATP1A2,ATP1B2,GNAQ,PLCB2,PRKCB,PRKCG,VDR,KL
11_Member	KEGG Pathway	ko04728	Dopaminergic synapse	-3.49222	-1.7718	16/130	817,1813,2774,2775,2776,2790,2890,2904,3709,4128,5330,5516,5522,5579,5582,55970	CAMK2D,DRD2,GNAL,GNAO1,GNAQ,GNG10,GRIA1,GRIN2B,ITPR2,MAOA,PLCB2,PPP2CB,PPP2R2C,PRKCB,PRKCG,GNG12
11_Member	WikiPathways	WP35	G Protein Signaling Pathways	-3.48008	-1.76265	13/93	2767,2774,2775,2776,2790,5579,5582,9495,11214,11216,27115,55970,445815	GNA11,GNAL,GNAO1,GNAQ,GNG10,PRKCB,PRKCG,AKAP5,AKAP13,AKAP10,PDE7B,GNG12,PALM2AKAP2
11_Member	KEGG Pathway	hsa04728	Dopaminergic synapse	-3.41676	-1.71929	16/132	817,1813,2774,2775,2776,2790,2890,2904,3709,4128,5330,5516,5522,5579,5582,55970	CAMK2D,DRD2,GNAL,GNAO1,GNAQ,GNG10,GRIA1,GRIN2B,ITPR2,MAOA,PLCB2,PPP2CB,PPP2R2C,PRKCB,PRKCG,GNG12
11_Member	KEGG Pathway	hsa04961	Endocrine and other factor-regulated calcium reabsorption	-3.38673	-1.69345	9/50	163,477,482,2776,5330,5579,5582,7421,9365	AP2B1,ATP1A2,ATP1B2,GNAQ,PLCB2,PRKCB,PRKCG,VDR,KL
11_Member	KEGG Pathway	ko04972	Pancreatic secretion	-3.34352	-1.67083	13/96	477,482,493,2776,3709,4218,5330,5579,5582,5645,5874,8671,81579	ATP1A2,ATP1B2,ATP2B4,GNAQ,ITPR2,RAB8A,PLCB2,PRKCB,PRKCG,PRSS2,RAB27B,SLC4A4,PLA2G12A
11_Member	WikiPathways	WP536	Calcium Regulation in the Cardiac Cell	-3.28284	-1.62203	17/149	408,482,814,817,2697,2767,2775,2776,3709,5569,5570,5579,5582,7529,8601,10804,55970	ARRB1,ATP1B2,CAMK4,CAMK2D,GJA1,GNA11,GNAO1,GNAQ,ITPR2,PKIA,PKIB,PRKCB,PRKCG,YWHAB,RGS20,GJB6,GNG12
11_Member	Canonical Pathways	M8	PID ENDOTHELIN PATHWAY	-3.24429	-1.5921	10/63	1910,2767,2774,2775,2776,5330,5579,5582,5594,7225	EDNRB,GNA11,GNAL,GNAO1,GNAQ,PLCB2,PRKCB,PRKCG,MAPK1,TRPC6
11_Member	KEGG Pathway	ko04971	Gastric acid secretion	-3.21037	-1.56632	11/75	477,482,817,2776,3709,3758,5330,5579,5582,6752,7430	ATP1A2,ATP1B2,CAMK2D,GNAQ,ITPR2,KCNJ1,PLCB2,PRKCB,PRKCG,SSTR2,EZR
11_Member	KEGG Pathway	hsa04928	parathyroid hormone synthesis, secretion and action	-3.15751	-1.53019	14/113	408,596,1026,2767,2776,3709,5330,5579,5582,5594,6258,7421,9365,11214	ARRB1,BCL2,CDKN1A,GNA11,GNAQ,ITPR2,PLCB2,PRKCB,PRKCG,MAPK1,RXRG,VDR,KL,AKAP13
11_Member	KEGG Pathway	hsa04971	Gastric acid secretion	-3.11183	-1.4925	11/77	477,482,817,2776,3709,3758,5330,5579,5582,6752,7430	ATP1A2,ATP1B2,CAMK2D,GNAQ,ITPR2,KCNJ1,PLCB2,PRKCB,PRKCG,SSTR2,EZR
11_Member	KEGG Pathway	hsa04972	Pancreatic secretion	-3.04852	-1.44582	13/103	477,482,493,2776,3709,4218,5330,5579,5582,5645,5874,8671,81579	ATP1A2,ATP1B2,ATP2B4,GNAQ,ITPR2,RAB8A,PLCB2,PRKCB,PRKCG,PRSS2,RAB27B,SLC4A4,PLA2G12A
11_Member	KEGG Pathway	ko04918	Thyroid hormone synthesis	-2.69232	-1.19256	10/74	477,482,2776,2936,3709,5330,5579,5582,7184,7849	ATP1A2,ATP1B2,GNAQ,GSR,ITPR2,PLCB2,PRKCB,PRKCG,HSP90B1,PAX8
11_Member	KEGG Pathway	hsa04022	cGMP-PKG signaling pathway	-2.56749	-1.09794	17/173	152,477,482,493,1910,2767,2776,3709,4878,5138,5139,5330,5534,5594,7225,8660,10335	ADRA2C,ATP1A2,ATP1B2,ATP2B4,EDNRB,GNA11,GNAQ,ITPR2,NPPA,PDE2A,PDE3A,PLCB2,PPP3R1,MAPK1,TRPC6,IRS2,IRAG1
11_Member	KEGG Pathway	ko04071	Sphingolipid signaling pathway	-2.51005	-1.06601	13/118	596,1901,2534,2776,5296,5330,5516,5522,5579,5582,5594,5728,81537	BCL2,S1PR1,FYN,GNAQ,PIK3R2,PLCB2,PPP2CB,PPP2R2C,PRKCB,PRKCG,MAPK1,PTEN,SGPP1
11_Member	KEGG Pathway	hsa04916	Melanogenesis	-2.48909	-1.04989	12/105	817,1910,2775,2776,5330,5443,5579,5582,5594,8321,8325,56288	CAMK2D,EDNRB,GNAO1,GNAQ,PLCB2,POMC,PRKCB,PRKCG,MAPK1,FZD1,FZD8,PARD3
11_Member	KEGG Pathway	hsa04261	Adrenergic signaling in cardiomyocytes	-2.48472	-1.04698	15/147	183,477,482,493,596,781,817,1390,2776,5330,5516,5522,5594,7134,11069	AGT,ATP1A2,ATP1B2,ATP2B4,BCL2,CACNA2D1,CAMK2D,CREM,GNAQ,PLCB2,PPP2CB,PPP2R2C,MAPK1,TNNC1,RAPGEF4
11_Member	KEGG Pathway	hsa04918	Thyroid hormone synthesis	-2.47969	-1.04299	10/79	477,482,2776,2936,3709,5330,5579,5582,7184,7849	ATP1A2,ATP1B2,GNAQ,GSR,ITPR2,PLCB2,PRKCB,PRKCG,HSP90B1,PAX8
11_Member	KEGG Pathway	hsa04911	Insulin secretion	-2.47759	-1.04296	11/92	117,477,482,817,2767,2776,5330,5579,5582,11069,27445	ADCYAP1R1,ATP1A2,ATP1B2,CAMK2D,GNA11,GNAQ,PLCB2,PRKCB,PRKCG,RAPGEF4,PCLO
11_Member	KEGG Pathway	ko04022	cGMP-PKG signaling pathway	-2.44472	-1.01677	16/163	152,477,482,493,1910,2767,2776,3709,5138,5139,5330,5534,5594,7225,8660,10335	ADRA2C,ATP1A2,ATP1B2,ATP2B4,EDNRB,GNA11,GNAQ,ITPR2,PDE2A,PDE3A,PLCB2,PPP3R1,MAPK1,TRPC6,IRS2,IRAG1
11_Member	Reactome Gene Sets	R-HSA-112040	G-protein mediated events	-2.40615	-0.984266	8/56	814,817,2774,2775,3709,5330,5582,5594	CAMK4,CAMK2D,GNAL,GNAO1,ITPR2,PLCB2,PRKCG,MAPK1
11_Member	KEGG Pathway	hsa04970	Salivary secretion	-2.40489	-0.983507	11/94	477,482,493,2776,3346,3709,5330,5542,5579,5582,340719	ATP1A2,ATP1B2,ATP2B4,GNAQ,HTN1,ITPR2,PLCB2,PRB1,PRKCB,PRKCG,NANOS1
11_Member	KEGG Pathway	ko05146	Amoebiasis	-2.33459	-0.937102	11/96	2767,2774,2776,5296,5330,5579,5582,5747,5869,7099,7879	GNA11,GNAL,GNAQ,PIK3R2,PLCB2,PRKCB,PRKCG,PTK2,RAB5B,TLR4,RAB7A
11_Member	KEGG Pathway	hsa04071	Sphingolipid signaling pathway	-2.20875	-0.838404	13/128	596,1901,2534,2776,5296,5330,5516,5522,5579,5582,5594,5728,81537	BCL2,S1PR1,FYN,GNAQ,PIK3R2,PLCB2,PPP2CB,PPP2R2C,PRKCB,PRKCG,MAPK1,PTEN,SGPP1
11_Member	KEGG Pathway	ko04261	Adrenergic signaling in cardiomyocytes	-2.17117	-0.818726	14/144	477,482,493,596,781,817,1390,2776,5330,5516,5522,5594,7134,11069	ATP1A2,ATP1B2,ATP2B4,BCL2,CACNA2D1,CAMK2D,CREM,GNAQ,PLCB2,PPP2CB,PPP2R2C,MAPK1,TNNC1,RAPGEF4
11_Member	KEGG Pathway	ko04916	Melanogenesis	-2.16858	-0.817421	11/101	817,1910,2775,2776,5330,5443,5579,5582,5594,8321,8325	CAMK2D,EDNRB,GNAO1,GNAQ,PLCB2,POMC,PRKCB,PRKCG,MAPK1,FZD1,FZD8
11_Member	KEGG Pathway	ko05142	Chagas disease (American trypanosomiasis)	-2.13696	-0.791005	11/102	2767,2774,2775,2776,4087,5296,5330,5516,5522,5594,7099	GNA11,GNAL,GNAO1,GNAQ,SMAD2,PIK3R2,PLCB2,PPP2CB,PPP2R2C,MAPK1,TLR4
11_Member	KEGG Pathway	hsa04921	Oxytocin signaling pathway	-2.12024	-0.77862	15/161	781,814,817,1026,2775,2776,3709,4878,5021,5330,5534,5579,5582,5594,8681	CACNA2D1,CAMK4,CAMK2D,CDKN1A,GNAO1,GNAQ,ITPR2,NPPA,OXTR,PLCB2,PPP3R1,PRKCB,PRKCG,MAPK1,JMJD7-PLA2G4B
11_Member	KEGG Pathway	hsa05163	human cytomegalovirus infection	-2.10281	-0.766335	20/240	1026,2767,2775,2776,2790,2923,3709,5156,5296,5330,5534,5579,5582,5594,5733,5747,7422,8737,11214,55970	CDKN1A,GNA11,GNAO1,GNAQ,GNG10,PDIA3,ITPR2,PDGFRA,PIK3R2,PLCB2,PPP3R1,PRKCB,PRKCG,MAPK1,PTGER3,PTK2,VEGFA,RIPK1,AKAP13,GNG12
11_Member	KEGG Pathway	ko04970	Salivary secretion	-2.07697	-0.750278	10/90	477,482,493,2776,3346,3709,5330,5542,5579,5582	ATP1A2,ATP1B2,ATP2B4,GNAQ,HTN1,ITPR2,PLCB2,PRB1,PRKCB,PRKCG
11_Member	WikiPathways	WP363	Wnt Signaling Pathway (Netpath)	-2.07112	-0.746446	7/51	607,1453,2697,5579,5582,5594,7010	BCL9,CSNK1D,GJA1,PRKCB,PRKCG,MAPK1,TEK
11_Member	KEGG Pathway	hsa05170	human immunodeficiency virus 1 infection	-2.0057	-0.708878	19/229	596,2767,2775,2776,2790,2923,3709,5058,5296,5534,5579,5582,5594,5747,7099,8450,8737,23118,55970	BCL2,GNA11,GNAO1,GNAQ,GNG10,PDIA3,ITPR2,PAK1,PIK3R2,PPP3R1,PRKCB,PRKCG,MAPK1,PTK2,TLR4,CUL4B,RIPK1,TAB2,GNG12
12_Summary	KEGG Pathway	ko05034	Alcoholism	-7.78626	-5.10781	28/180	814,1813,2775,2790,2904,2905,3012,3017,3018,4128,4915,5173,5569,5594,8340,8341,8342,8345,8348,8349,8351,8969,8970,53358,55970,158983,317772,474381,5828,5830,7324,7336,51322,79139,7328,7347,341,346,348,596,1374,2066,3326,4602,5296,5441,5747,6258,8850,8854,9166,9682,23189,56603,57678,221656,2139,4361,7158,9577,7518,1107,2965,2967,51082,57504,1026,3006,23523,57634,817,830,847,1030,1032,2887,2936,448…	CAMK4,DRD2,GNAO1,GNG10,GRIN2B,GRIN2C,H2AC8,H2BC5,H2BC3,MAOA,NTRK2,PDYN,PKIA,MAPK1,H2BC13,H2BC15,H2BC14,H2BC9,H2BC17,H2BC21,H3C4,H2AC11,H2BC11,SHC3,GNG12,H2BW1,H2AC21,H2AB2,PEX2,PEX5,UBE2E1,UBE2V2,WAC,DERL1,UBE2H,UCHL3,APOC1,APOC4,APOE,BCL2,CPT1A,ERBB4,HSP90AB1,MYB,PIK3R2,POLR2L,PTK2,RXRG,KAT2B,ALDH1A2,EBAG9,KDM4A,KANK1,CYP26B1,GPAM,KDM1B,EYA2,MRE11,TP53BP1,BABAM2,XRCC4,CHD3,GTF2H1,GTF2H3,POLR1D,M…
12_Member	KEGG Pathway	ko05034	Alcoholism	-7.78626	-5.10781	28/180	814,1813,2775,2790,2904,2905,3012,3017,3018,4128,4915,5173,5569,5594,8340,8341,8342,8345,8348,8349,8351,8969,8970,53358,55970,158983,317772,474381	CAMK4,DRD2,GNAO1,GNG10,GRIN2B,GRIN2C,H2AC8,H2BC5,H2BC3,MAOA,NTRK2,PDYN,PKIA,MAPK1,H2BC13,H2BC15,H2BC14,H2BC9,H2BC17,H2BC21,H3C4,H2AC11,H2BC11,SHC3,GNG12,H2BW1,H2AC21,H2AB2
12_Member	KEGG Pathway	hsa05034	Alcoholism	-7.52173	-4.89522	28/185	814,1813,2775,2790,2904,2905,3012,3017,3018,4128,4915,5173,5569,5594,8340,8341,8342,8345,8348,8349,8351,8969,8970,53358,55970,158983,317772,474381	CAMK4,DRD2,GNAO1,GNG10,GRIN2B,GRIN2C,H2AC8,H2BC5,H2BC3,MAOA,NTRK2,PDYN,PKIA,MAPK1,H2BC13,H2BC15,H2BC14,H2BC9,H2BC17,H2BC21,H3C4,H2AC11,H2BC11,SHC3,GNG12,H2BW1,H2AC21,H2AB2
12_Member	Reactome Gene Sets	R-HSA-8866654	E3 ubiquitin ligases ubiquitinate target proteins	-6.46837	-4.04396	14/59	3017,3018,5828,5830,7324,7336,8340,8341,8342,8345,8348,8970,51322,79139	H2BC5,H2BC3,PEX2,PEX5,UBE2E1,UBE2V2,H2BC13,H2BC15,H2BC14,H2BC9,H2BC17,H2BC11,WAC,DERL1
12_Member	Reactome Gene Sets	R-HSA-8852135	Protein ubiquitination	-6.28788	-3.89746	16/79	3017,3018,5828,5830,7324,7328,7336,7347,8340,8341,8342,8345,8348,8970,51322,79139	H2BC5,H2BC3,PEX2,PEX5,UBE2E1,UBE2H,UBE2V2,UCHL3,H2BC13,H2BC15,H2BC14,H2BC9,H2BC17,H2BC11,WAC,DERL1
12_Member	Reactome Gene Sets	R-HSA-9006931	Signaling by Nuclear Receptors	-5.90232	-3.58085	34/299	341,346,348,596,1374,2066,2790,3012,3017,3018,3326,4602,5296,5441,5594,5747,6258,8340,8341,8342,8345,8348,8349,8351,8850,8854,8970,9166,9682,23189,55970,56603,57678,221656	APOC1,APOC4,APOE,BCL2,CPT1A,ERBB4,GNG10,H2AC8,H2BC5,H2BC3,HSP90AB1,MYB,PIK3R2,POLR2L,MAPK1,PTK2,RXRG,H2BC13,H2BC15,H2BC14,H2BC9,H2BC17,H2BC21,H3C4,KAT2B,ALDH1A2,H2BC11,EBAG9,KDM4A,KANK1,GNG12,CYP26B1,GPAM,KDM1B
12_Member	Reactome Gene Sets	R-HSA-5693565	Recruitment and ATM-mediated phosphorylation of repair and signaling proteins at DNA double strand breaks	-5.70893	-3.44634	15/77	2139,3017,3018,4361,7158,7336,8340,8341,8342,8345,8348,8349,8970,9577,9682	EYA2,H2BC5,H2BC3,MRE11,TP53BP1,UBE2V2,H2BC13,H2BC15,H2BC14,H2BC9,H2BC17,H2BC21,H2BC11,BABAM2,KDM4A
12_Member	Reactome Gene Sets	R-HSA-5693606	DNA Double Strand Break Response	-5.63491	-3.38995	15/78	2139,3017,3018,4361,7158,7336,8340,8341,8342,8345,8348,8349,8970,9577,9682	EYA2,H2BC5,H2BC3,MRE11,TP53BP1,UBE2V2,H2BC13,H2BC15,H2BC14,H2BC9,H2BC17,H2BC21,H2BC11,BABAM2,KDM4A
12_Member	Reactome Gene Sets	R-HSA-5693571	Nonhomologous End-Joining (NHEJ)	-5.58983	-3.36125	14/69	3017,3018,4361,7158,7336,7518,8340,8341,8342,8345,8348,8349,8970,9577	H2BC5,H2BC3,MRE11,TP53BP1,UBE2V2,XRCC4,H2BC13,H2BC15,H2BC14,H2BC9,H2BC17,H2BC21,H2BC11,BABAM2
12_Member	Reactome Gene Sets	R-HSA-73854	RNA Polymerase I Promoter Clearance	-5.56284	-3.34537	18/110	1107,2965,2967,3012,3017,3018,5441,8340,8341,8342,8345,8348,8349,8351,8850,8970,51082,57504	CHD3,GTF2H1,GTF2H3,H2AC8,H2BC5,H2BC3,POLR2L,H2BC13,H2BC15,H2BC14,H2BC9,H2BC17,H2BC21,H3C4,KAT2B,H2BC11,POLR1D,MTA3
12_Member	Reactome Gene Sets	R-HSA-2559586	DNA Damage/Telomere Stress Induced Senescence	-5.49075	-3.29883	15/80	1026,3006,3012,3017,3018,4361,8340,8341,8342,8345,8348,8349,8970,23523,57634	CDKN1A,H1-2,H2AC8,H2BC5,H2BC3,MRE11,H2BC13,H2BC15,H2BC14,H2BC9,H2BC17,H2BC21,H2BC11,CABIN1,EP400
12_Member	Reactome Gene Sets	R-HSA-73864	RNA Polymerase I Transcription	-5.44768	-3.25903	18/112	1107,2965,2967,3012,3017,3018,5441,8340,8341,8342,8345,8348,8349,8351,8850,8970,51082,57504	CHD3,GTF2H1,GTF2H3,H2AC8,H2BC5,H2BC3,POLR2L,H2BC13,H2BC15,H2BC14,H2BC9,H2BC17,H2BC21,H3C4,KAT2B,H2BC11,POLR1D,MTA3
12_Member	Reactome Gene Sets	R-HSA-8953897	Cellular responses to external stimuli	-5.34318	-3.19195	53/598	817,830,847,1026,1030,1032,2887,2936,3006,3012,3017,3018,3326,4361,4489,4495,4496,4501,4502,5594,6159,6168,6170,6229,6649,7296,7324,7422,8340,8341,8342,8345,8348,8349,8351,8970,9532,11097,23043,23523,28956,50488,55364,55706,57634,58528,64344,79400,80012,84516,144577,347733,652968	CAMK2D,CAPZA2,CAT,CDKN1A,CDKN2B,CDKN2D,GRB10,GSR,H1-2,H2AC8,H2BC5,H2BC3,HSP90AB1,MRE11,MT1A,MT1G,MT1H,MT1X,MT2A,MAPK1,RPL29,RPL37A,RPL39,RPS24,SOD3,TXNRD1,UBE2E1,VEGFA,H2BC13,H2BC15,H2BC14,H2BC9,H2BC17,H2BC21,H3C4,H2BC11,BAG2,NUP42,TNIK,CABIN1,LAMTOR2,MINK1,IMPACT,NDC1,EP400,RRAGD,HIF3A,NOX5,PHC3,DCTN5,C12orf66,TUBB2B,CASTOR1
12_Member	Reactome Gene Sets	R-HSA-3214815	HDACs deacetylate histones	-5.2419	-3.11599	16/94	1107,3012,3017,3018,5926,8340,8341,8342,8345,8348,8349,8351,8969,8970,57504,317772	CHD3,H2AC8,H2BC5,H2BC3,ARID4A,H2BC13,H2BC15,H2BC14,H2BC9,H2BC17,H2BC21,H3C4,H2AC11,H2BC11,MTA3,H2AC21
12_Member	Reactome Gene Sets	R-HSA-3214847	HATs acetylate histones	-5.07684	-2.96782	20/142	3012,3017,3018,8340,8341,8342,8345,8348,8349,8351,8464,8850,8969,8970,11091,56970,57634,84289,317772,339287	H2AC8,H2BC5,H2BC3,H2BC13,H2BC15,H2BC14,H2BC9,H2BC17,H2BC21,H3C4,SUPT3H,KAT2B,H2AC11,H2BC11,WDR5,ATXN7L3,EP400,ING5,H2AC21,MSL1
12_Member	Reactome Gene Sets	R-HSA-195721	Signaling by WNT	-4.90396	-2.82676	34/332	163,331,607,1455,1457,2775,2790,3012,3017,3018,3709,5330,5516,5534,5579,5582,6657,6659,7088,8321,8325,8340,8341,8342,8345,8348,8349,8351,8970,11197,51339,55970,57154,84870	AP2B1,XIAP,BCL9,CSNK1G2,CSNK2A1,GNAO1,GNG10,H2AC8,H2BC5,H2BC3,ITPR2,PLCB2,PPP2CB,PPP3R1,PRKCB,PRKCG,SOX2,SOX4,TLE1,FZD1,FZD8,H2BC13,H2BC15,H2BC14,H2BC9,H2BC17,H2BC21,H3C4,H2BC11,WIF1,DACT1,GNG12,SMURF1,RSPO3
12_Member	Reactome Gene Sets	R-HSA-73772	RNA Polymerase I Promoter Escape	-4.77935	-2.74882	15/91	2965,2967,3012,3017,3018,5441,8340,8341,8342,8345,8348,8349,8351,8970,51082	GTF2H1,GTF2H3,H2AC8,H2BC5,H2BC3,POLR2L,H2BC13,H2BC15,H2BC14,H2BC9,H2BC17,H2BC21,H3C4,H2BC11,POLR1D
12_Member	Reactome Gene Sets	R-HSA-212165	Epigenetic regulation of gene expression	-4.76138	-2.73492	20/149	1107,2965,2967,3012,3017,3018,5441,8340,8341,8342,8345,8348,8349,8351,8850,8970,22823,51082,54790,57504	CHD3,GTF2H1,GTF2H3,H2AC8,H2BC5,H2BC3,POLR2L,H2BC13,H2BC15,H2BC14,H2BC9,H2BC17,H2BC21,H3C4,KAT2B,H2BC11,MTF2,POLR1D,TET2,MTA3
12_Member	Reactome Gene Sets	R-HSA-9018519	Estrogen-dependent gene expression	-4.71815	-2.69969	20/150	596,2066,3012,3017,3018,3326,4602,5441,8340,8341,8342,8345,8348,8349,8351,8850,8970,9166,23189,57678	BCL2,ERBB4,H2AC8,H2BC5,H2BC3,HSP90AB1,MYB,POLR2L,H2BC13,H2BC15,H2BC14,H2BC9,H2BC17,H2BC21,H3C4,KAT2B,H2BC11,EBAG9,KANK1,GPAM
12_Member	Reactome Gene Sets	R-HSA-5250913	Positive epigenetic regulation of rRNA expression	-4.5619	-2.57459	16/106	1107,3012,3017,3018,5441,8340,8341,8342,8345,8348,8349,8351,8850,8970,51082,57504	CHD3,H2AC8,H2BC5,H2BC3,POLR2L,H2BC13,H2BC15,H2BC14,H2BC9,H2BC17,H2BC21,H3C4,KAT2B,H2BC11,POLR1D,MTA3
12_Member	Reactome Gene Sets	R-HSA-69473	G2/M DNA damage checkpoint	-4.55022	-2.56971	15/95	3017,3018,3364,4361,7158,7336,7529,8340,8341,8342,8345,8348,8349,8970,9577	H2BC5,H2BC3,HUS1,MRE11,TP53BP1,UBE2V2,YWHAB,H2BC13,H2BC15,H2BC14,H2BC9,H2BC17,H2BC21,H2BC11,BABAM2
12_Member	Reactome Gene Sets	R-HSA-3247509	Chromatin modifying enzymes	-4.53955	-2.56266	29/274	1107,3012,3017,3018,5926,8340,8341,8342,8345,8348,8349,8351,8464,8850,8969,8970,9682,11091,22992,51780,56970,57504,57634,84289,84864,221656,317772,339287,387893	CHD3,H2AC8,H2BC5,H2BC3,ARID4A,H2BC13,H2BC15,H2BC14,H2BC9,H2BC17,H2BC21,H3C4,SUPT3H,KAT2B,H2AC11,H2BC11,KDM4A,WDR5,KDM2A,KDM3B,ATXN7L3,MTA3,EP400,ING5,RIOX2,KDM1B,H2AC21,MSL1,KMT5A
12_Member	Reactome Gene Sets	R-HSA-4839726	Chromatin organization	-4.53955	-2.56266	29/274	1107,3012,3017,3018,5926,8340,8341,8342,8345,8348,8349,8351,8464,8850,8969,8970,9682,11091,22992,51780,56970,57504,57634,84289,84864,221656,317772,339287,387893	CHD3,H2AC8,H2BC5,H2BC3,ARID4A,H2BC13,H2BC15,H2BC14,H2BC9,H2BC17,H2BC21,H3C4,SUPT3H,KAT2B,H2AC11,H2BC11,KDM4A,WDR5,KDM2A,KDM3B,ATXN7L3,MTA3,EP400,ING5,RIOX2,KDM1B,H2AC21,MSL1,KMT5A
12_Member	Reactome Gene Sets	R-HSA-8939211	ESR-mediated signaling	-4.40986	-2.4592	25/223	596,2066,2790,3012,3017,3018,3326,4602,5296,5441,5594,5747,8340,8341,8342,8345,8348,8349,8351,8850,8970,9166,23189,55970,57678	BCL2,ERBB4,GNG10,H2AC8,H2BC5,H2BC3,HSP90AB1,MYB,PIK3R2,POLR2L,MAPK1,PTK2,H2BC13,H2BC15,H2BC14,H2BC9,H2BC17,H2BC21,H3C4,KAT2B,H2BC11,EBAG9,KANK1,GNG12,GPAM
12_Member	Reactome Gene Sets	R-HSA-427389	ERCC6 (CSB) and EHMT2 (G9a) positively regulate rRNA expression	-4.39668	-2.45107	13/76	1107,3012,3017,3018,8340,8341,8342,8345,8348,8349,8351,8970,57504	CHD3,H2AC8,H2BC5,H2BC3,H2BC13,H2BC15,H2BC14,H2BC9,H2BC17,H2BC21,H3C4,H2BC11,MTA3
12_Member	Reactome Gene Sets	R-HSA-5693607	Processing of DNA double-strand break ends	-4.3873	-2.4467	15/98	3017,3018,3364,4361,7158,7336,8340,8341,8342,8345,8348,8349,8970,9577,63967	H2BC5,H2BC3,HUS1,MRE11,TP53BP1,UBE2V2,H2BC13,H2BC15,H2BC14,H2BC9,H2BC17,H2BC21,H2BC11,BABAM2,CLSPN
12_Member	Reactome Gene Sets	R-HSA-2559583	Cellular Senescence	-4.38232	-2.44502	23/197	1026,1030,1032,3006,3012,3017,3018,4361,5594,7324,8340,8341,8342,8345,8348,8349,8351,8970,23043,23523,50488,57634,80012	CDKN1A,CDKN2B,CDKN2D,H1-2,H2AC8,H2BC5,H2BC3,MRE11,MAPK1,UBE2E1,H2BC13,H2BC15,H2BC14,H2BC9,H2BC17,H2BC21,H3C4,H2BC11,TNIK,CABIN1,MINK1,EP400,PHC3
12_Member	Reactome Gene Sets	R-HSA-5688426	Deubiquitination	-4.29211	-2.37569	30/297	330,408,3012,3017,3018,4087,5423,5728,7347,8340,8341,8342,8345,8348,8349,8737,8850,8969,8970,9097,9577,23586,29844,57599,63967,78990,90865,123228,221656,317772	BIRC3,ARRB1,H2AC8,H2BC5,H2BC3,SMAD2,POLB,PTEN,UCHL3,H2BC13,H2BC15,H2BC14,H2BC9,H2BC17,H2BC21,RIPK1,KAT2B,H2AC11,H2BC11,USP14,BABAM2,DDX58,TFPT,WDR48,CLSPN,OTUB2,IL33,SENP8,KDM1B,H2AC21
12_Member	Reactome Gene Sets	R-HSA-2559582	Senescence-Associated Secretory Phenotype (SASP)	-4.26245	-2.359	16/112	1026,1030,1032,3012,3017,3018,5594,7324,8340,8341,8342,8345,8348,8349,8351,8970	CDKN1A,CDKN2B,CDKN2D,H2AC8,H2BC5,H2BC3,MAPK1,UBE2E1,H2BC13,H2BC15,H2BC14,H2BC9,H2BC17,H2BC21,H3C4,H2BC11
12_Member	Reactome Gene Sets	R-HSA-2559580	Oxidative Stress Induced Senescence	-4.21354	-2.3215	17/125	1030,1032,3012,3017,3018,5594,8340,8341,8342,8345,8348,8349,8351,8970,23043,50488,80012	CDKN2B,CDKN2D,H2AC8,H2BC5,H2BC3,MAPK1,H2BC13,H2BC15,H2BC14,H2BC9,H2BC17,H2BC21,H3C4,H2BC11,TNIK,MINK1,PHC3
12_Member	Reactome Gene Sets	R-HSA-5250924	B-WICH complex positively regulates rRNA expression	-4.15991	-2.27812	14/91	3012,3017,3018,5441,8340,8341,8342,8345,8348,8349,8351,8850,8970,51082	H2AC8,H2BC5,H2BC3,POLR2L,H2BC13,H2BC15,H2BC14,H2BC9,H2BC17,H2BC21,H3C4,KAT2B,H2BC11,POLR1D
12_Member	Reactome Gene Sets	R-HSA-2262752	Cellular responses to stress	-4.07676	-2.21201	48/584	817,830,847,1026,1030,1032,2887,2936,3006,3012,3017,3018,3326,4361,5594,6159,6168,6170,6229,6649,7296,7324,7422,8340,8341,8342,8345,8348,8349,8351,8970,9532,11097,23043,23523,28956,50488,55364,55706,57634,58528,64344,79400,80012,84516,144577,347733,652968	CAMK2D,CAPZA2,CAT,CDKN1A,CDKN2B,CDKN2D,GRB10,GSR,H1-2,H2AC8,H2BC5,H2BC3,HSP90AB1,MRE11,MAPK1,RPL29,RPL37A,RPL39,RPS24,SOD3,TXNRD1,UBE2E1,VEGFA,H2BC13,H2BC15,H2BC14,H2BC9,H2BC17,H2BC21,H3C4,H2BC11,BAG2,NUP42,TNIK,CABIN1,LAMTOR2,MINK1,IMPACT,NDC1,EP400,RRAGD,HIF3A,NOX5,PHC3,DCTN5,C12orf66,TUBB2B,CASTOR1
12_Member	Reactome Gene Sets	R-HSA-68875	Mitotic Prophase	-4.01902	-2.16391	18/142	3012,3017,3018,5516,5579,5594,8340,8341,8342,8345,8348,8349,8351,8970,10783,11097,55706,387893	H2AC8,H2BC5,H2BC3,PPP2CB,PRKCB,MAPK1,H2BC13,H2BC15,H2BC14,H2BC9,H2BC17,H2BC21,H3C4,H2BC11,NEK6,NUP42,NDC1,KMT5A
12_Member	Reactome Gene Sets	R-HSA-5578749	Transcriptional regulation by small RNAs	-3.98631	-2.14328	15/106	3012,3017,3018,5441,8340,8341,8342,8345,8348,8349,8351,8970,10526,11097,55706	H2AC8,H2BC5,H2BC3,POLR2L,H2BC13,H2BC15,H2BC14,H2BC9,H2BC17,H2BC21,H3C4,H2BC11,IPO8,NUP42,NDC1
12_Member	Reactome Gene Sets	R-HSA-171306	Packaging Of Telomere Ends	-3.95271	-2.11583	10/52	3012,3017,3018,8340,8341,8342,8345,8348,8349,8970	H2AC8,H2BC5,H2BC3,H2BC13,H2BC15,H2BC14,H2BC9,H2BC17,H2BC21,H2BC11
12_Member	Reactome Gene Sets	R-HSA-5625740	RHO GTPases activate PKNs	-3.95229	-2.11583	14/95	3012,3017,3018,4628,5058,7529,8340,8341,8342,8345,8348,8349,8351,8970	H2AC8,H2BC5,H2BC3,MYH10,PAK1,YWHAB,H2BC13,H2BC15,H2BC14,H2BC9,H2BC17,H2BC21,H3C4,H2BC11
12_Member	Reactome Gene Sets	R-HSA-427413	NoRC negatively regulates rRNA expression	-3.93933	-2.10676	15/107	2965,2967,3012,3017,3018,5441,8340,8341,8342,8345,8348,8349,8351,8970,51082	GTF2H1,GTF2H3,H2AC8,H2BC5,H2BC3,POLR2L,H2BC13,H2BC15,H2BC14,H2BC9,H2BC17,H2BC21,H3C4,H2BC11,POLR1D
12_Member	Reactome Gene Sets	R-HSA-212300	PRC2 methylates histones and DNA	-3.93084	-2.10469	12/73	3012,3017,3018,8340,8341,8342,8345,8348,8349,8351,8970,22823	H2AC8,H2BC5,H2BC3,H2BC13,H2BC15,H2BC14,H2BC9,H2BC17,H2BC21,H3C4,H2BC11,MTF2
12_Member	Reactome Gene Sets	R-HSA-73728	RNA Polymerase I Promoter Opening	-3.89248	-2.08135	11/63	3012,3017,3018,8340,8341,8342,8345,8348,8349,8351,8970	H2AC8,H2BC5,H2BC3,H2BC13,H2BC15,H2BC14,H2BC9,H2BC17,H2BC21,H3C4,H2BC11
12_Member	KEGG Pathway	ko05322	Systemic lupus erythematosus	-3.87431	-2.06563	17/133	715,2904,3012,3017,3018,8340,8341,8342,8345,8348,8349,8351,8969,8970,158983,317772,474381	C1R,GRIN2B,H2AC8,H2BC5,H2BC3,H2BC13,H2BC15,H2BC14,H2BC9,H2BC17,H2BC21,H3C4,H2AC11,H2BC11,H2BW1,H2AC21,H2AB2
12_Member	Reactome Gene Sets	R-HSA-2299718	Condensation of Prophase Chromosomes	-3.87236	-2.06491	12/74	3012,3017,3018,8340,8341,8342,8345,8348,8349,8351,8970,387893	H2AC8,H2BC5,H2BC3,H2BC13,H2BC15,H2BC14,H2BC9,H2BC17,H2BC21,H3C4,H2BC11,KMT5A
12_Member	KEGG Pathway	hsa05322	Systemic lupus erythematosus	-3.863	-2.0604	18/146	715,2775,2904,3012,3017,3018,8340,8341,8342,8345,8348,8349,8351,8969,8970,158983,317772,474381	C1R,GNAO1,GRIN2B,H2AC8,H2BC5,H2BC3,H2BC13,H2BC15,H2BC14,H2BC9,H2BC17,H2BC21,H3C4,H2AC11,H2BC11,H2BW1,H2AC21,H2AB2
12_Member	Reactome Gene Sets	R-HSA-912446	Meiotic recombination	-3.82564	-2.02843	13/86	3012,3017,3018,4361,8340,8341,8342,8345,8348,8349,8351,8970,11144	H2AC8,H2BC5,H2BC3,MRE11,H2BC13,H2BC15,H2BC14,H2BC9,H2BC17,H2BC21,H3C4,H2BC11,DMC1
12_Member	Reactome Gene Sets	R-HSA-5250941	Negative epigenetic regulation of rRNA expression	-3.80223	-2.01152	15/110	2965,2967,3012,3017,3018,5441,8340,8341,8342,8345,8348,8349,8351,8970,51082	GTF2H1,GTF2H3,H2AC8,H2BC5,H2BC3,POLR2L,H2BC13,H2BC15,H2BC14,H2BC9,H2BC17,H2BC21,H3C4,H2BC11,POLR1D
12_Member	Reactome Gene Sets	R-HSA-9609690	HCMV Early Events	-3.79437	-2.00601	17/135	3012,3017,3018,8340,8341,8342,8345,8348,8349,8351,8969,8970,10951,11097,55706,317772,347733	H2AC8,H2BC5,H2BC3,H2BC13,H2BC15,H2BC14,H2BC9,H2BC17,H2BC21,H3C4,H2AC11,H2BC11,CBX1,NUP42,NDC1,H2AC21,TUBB2B
12_Member	Reactome Gene Sets	R-HSA-5334118	DNA methylation	-3.76655	-1.98514	11/65	3012,3017,3018,8340,8341,8342,8345,8348,8349,8351,8970	H2AC8,H2BC5,H2BC3,H2BC13,H2BC15,H2BC14,H2BC9,H2BC17,H2BC21,H3C4,H2BC11
12_Member	Reactome Gene Sets	R-HSA-73894	DNA Repair	-3.71305	-1.94073	31/335	2139,2965,2967,3012,3017,3018,3150,3364,3980,4361,5395,5423,5441,7158,7336,7518,8340,8341,8342,8345,8348,8349,8450,8970,9577,9682,10973,29844,57599,63967,64708	EYA2,GTF2H1,GTF2H3,H2AC8,H2BC5,H2BC3,HMGN1,HUS1,LIG3,MRE11,PMS2,POLB,POLR2L,TP53BP1,UBE2V2,XRCC4,H2BC13,H2BC15,H2BC14,H2BC9,H2BC17,H2BC21,CUL4B,H2BC11,BABAM2,KDM4A,ASCC3,TFPT,WDR48,CLSPN,COPS7B
12_Member	Reactome Gene Sets	R-HSA-201681	TCF dependent signaling in response to WNT	-3.68653	-1.91758	24/233	331,607,1455,1457,3012,3017,3018,5516,6657,6659,7088,8321,8325,8340,8341,8342,8345,8348,8349,8351,8970,11197,51339,84870	XIAP,BCL9,CSNK1G2,CSNK2A1,H2AC8,H2BC5,H2BC3,PPP2CB,SOX2,SOX4,TLE1,FZD1,FZD8,H2BC13,H2BC15,H2BC14,H2BC9,H2BC17,H2BC21,H3C4,H2BC11,WIF1,DACT1,RSPO3
12_Member	Reactome Gene Sets	R-HSA-110330	Recognition and association of DNA glycosylase with site containing an affected purine	-3.67283	-1.90942	10/56	3012,3017,3018,8340,8341,8342,8345,8348,8349,8970	H2AC8,H2BC5,H2BC3,H2BC13,H2BC15,H2BC14,H2BC9,H2BC17,H2BC21,H2BC11
12_Member	Reactome Gene Sets	R-HSA-110331	Cleavage of the damaged purine	-3.67283	-1.90942	10/56	3012,3017,3018,8340,8341,8342,8345,8348,8349,8970	H2AC8,H2BC5,H2BC3,H2BC13,H2BC15,H2BC14,H2BC9,H2BC17,H2BC21,H2BC11
12_Member	Reactome Gene Sets	R-HSA-73927	Depurination	-3.67283	-1.90942	10/56	3012,3017,3018,8340,8341,8342,8345,8348,8349,8970	H2AC8,H2BC5,H2BC3,H2BC13,H2BC15,H2BC14,H2BC9,H2BC17,H2BC21,H2BC11
12_Member	Reactome Gene Sets	R-HSA-5689880	Ub-specific processing proteases	-3.65258	-1.89247	23/220	330,408,3012,3017,3018,4087,5423,5728,8340,8341,8342,8345,8348,8349,8737,8969,8970,9097,23586,57599,63967,90865,317772	BIRC3,ARRB1,H2AC8,H2BC5,H2BC3,SMAD2,POLB,PTEN,H2BC13,H2BC15,H2BC14,H2BC9,H2BC17,H2BC21,RIPK1,H2AC11,H2BC11,USP14,DDX58,WDR48,CLSPN,IL33,H2AC21
12_Member	Reactome Gene Sets	R-HSA-5625886	Activated PKN1 stimulates transcription of AR (androgen receptor) regulated genes KLK2 and KLK3	-3.64594	-1.88801	11/67	3012,3017,3018,8340,8341,8342,8345,8348,8349,8351,8970	H2AC8,H2BC5,H2BC3,H2BC13,H2BC15,H2BC14,H2BC9,H2BC17,H2BC21,H3C4,H2BC11
12_Member	Reactome Gene Sets	R-HSA-9616222	Transcriptional regulation of granulopoiesis	-3.62334	-1.87082	13/90	1026,3012,3017,3018,4602,8340,8341,8342,8345,8348,8349,8351,8970	CDKN1A,H2AC8,H2BC5,H2BC3,MYB,H2BC13,H2BC15,H2BC14,H2BC9,H2BC17,H2BC21,H3C4,H2BC11
12_Member	Reactome Gene Sets	R-HSA-427359	SIRT1 negatively regulates rRNA expression	-3.58753	-1.84667	11/68	3012,3017,3018,8340,8341,8342,8345,8348,8349,8351,8970	H2AC8,H2BC5,H2BC3,H2BC13,H2BC15,H2BC14,H2BC9,H2BC17,H2BC21,H3C4,H2BC11
12_Member	Reactome Gene Sets	R-HSA-9670095	Inhibition of DNA recombination at telomere	-3.58753	-1.84667	11/68	3012,3017,3018,5441,8340,8341,8342,8345,8348,8349,8970	H2AC8,H2BC5,H2BC3,POLR2L,H2BC13,H2BC15,H2BC14,H2BC9,H2BC17,H2BC21,H2BC11
12_Member	Reactome Gene Sets	R-HSA-5693532	DNA Double-Strand Break Repair	-3.58276	-1.84295	19/167	2139,3017,3018,3364,3980,4361,7158,7336,7518,8340,8341,8342,8345,8348,8349,8970,9577,9682,63967	EYA2,H2BC5,H2BC3,HUS1,LIG3,MRE11,TP53BP1,UBE2V2,XRCC4,H2BC13,H2BC15,H2BC14,H2BC9,H2BC17,H2BC21,H2BC11,BABAM2,KDM4A,CLSPN
12_Member	Reactome Gene Sets	R-HSA-201722	Formation of the beta-catenin:TCF transactivating complex	-3.57481	-1.83604	13/91	607,3012,3017,3018,7088,8340,8341,8342,8345,8348,8349,8351,8970	BCL9,H2AC8,H2BC5,H2BC3,TLE1,H2BC13,H2BC15,H2BC14,H2BC9,H2BC17,H2BC21,H3C4,H2BC11
12_Member	Reactome Gene Sets	R-HSA-9610379	HCMV Late Events	-3.54426	-1.81355	15/116	3012,3017,3018,8340,8341,8342,8345,8348,8349,8351,8969,8970,11097,55706,317772	H2AC8,H2BC5,H2BC3,H2BC13,H2BC15,H2BC14,H2BC9,H2BC17,H2BC21,H3C4,H2AC11,H2BC11,NUP42,NDC1,H2AC21
12_Member	Reactome Gene Sets	R-HSA-8878171	Transcriptional regulation by RUNX1	-3.52143	-1.797	24/239	1457,3012,3017,3018,4602,5579,8340,8341,8342,8345,8348,8349,8351,8850,8861,8970,10138,10413,11091,26053,57678,80012,84870,100506658	CSNK2A1,H2AC8,H2BC5,H2BC3,MYB,PRKCB,H2BC13,H2BC15,H2BC14,H2BC9,H2BC17,H2BC21,H3C4,KAT2B,LDB1,H2BC11,YAF2,YAP1,WDR5,AUTS2,GPAM,PHC3,RSPO3,OCLN
12_Member	Reactome Gene Sets	R-HSA-1912408	Pre-NOTCH Transcription and Translation	-3.48008	-1.76265	13/93	3012,3017,3018,4853,8340,8341,8342,8345,8348,8349,8351,8850,8970	H2AC8,H2BC5,H2BC3,NOTCH2,H2BC13,H2BC15,H2BC14,H2BC9,H2BC17,H2BC21,H3C4,KAT2B,H2BC11
12_Member	GO Biological Processes	GO:0006334	nucleosome assembly	-3.42093	-1.72003	17/145	1060,3006,3017,3018,8340,8341,8342,8345,8348,8349,8351,8970,23523,128854,158983,373861,474381	CENPC,H1-2,H2BC5,H2BC3,H2BC13,H2BC15,H2BC14,H2BC9,H2BC17,H2BC21,H3C4,H2BC11,CABIN1,TSPY26P,H2BW1,H1-9P,H2AB2
12_Member	KEGG Pathway	ko05203	Viral carcinogenesis	-3.38435	-1.69315	21/201	1026,1030,1960,2965,2967,3017,3018,5296,5423,5594,5922,7529,8340,8341,8342,8345,8348,8349,8850,8970,158983	CDKN1A,CDKN2B,EGR3,GTF2H1,GTF2H3,H2BC5,H2BC3,PIK3R2,POLB,MAPK1,RASA2,YWHAB,H2BC13,H2BC15,H2BC14,H2BC9,H2BC17,H2BC21,KAT2B,H2BC11,H2BW1
12_Member	Reactome Gene Sets	R-HSA-110328	Recognition and association of DNA glycosylase with site containing an affected pyrimidine	-3.35965	-1.68108	10/61	3012,3017,3018,8340,8341,8342,8345,8348,8349,8970	H2AC8,H2BC5,H2BC3,H2BC13,H2BC15,H2BC14,H2BC9,H2BC17,H2BC21,H2BC11
12_Member	Reactome Gene Sets	R-HSA-110329	Cleavage of the damaged pyrimidine	-3.35965	-1.68108	10/61	3012,3017,3018,8340,8341,8342,8345,8348,8349,8970	H2AC8,H2BC5,H2BC3,H2BC13,H2BC15,H2BC14,H2BC9,H2BC17,H2BC21,H2BC11
12_Member	Reactome Gene Sets	R-HSA-73928	Depyrimidination	-3.35965	-1.68108	10/61	3012,3017,3018,8340,8341,8342,8345,8348,8349,8970	H2AC8,H2BC5,H2BC3,H2BC13,H2BC15,H2BC14,H2BC9,H2BC17,H2BC21,H2BC11
12_Member	Reactome Gene Sets	R-HSA-5617472	Activation of anterior HOX genes in hindbrain development during early embryogenesis	-3.34441	-1.67083	15/121	3012,3017,3018,3233,5316,5441,8340,8341,8342,8345,8348,8349,8351,8970,11091	H2AC8,H2BC5,H2BC3,HOXD4,PKNOX1,POLR2L,H2BC13,H2BC15,H2BC14,H2BC9,H2BC17,H2BC21,H3C4,H2BC11,WDR5
12_Member	Reactome Gene Sets	R-HSA-5619507	Activation of HOX genes during differentiation	-3.34441	-1.67083	15/121	3012,3017,3018,3233,5316,5441,8340,8341,8342,8345,8348,8349,8351,8970,11091	H2AC8,H2BC5,H2BC3,HOXD4,PKNOX1,POLR2L,H2BC13,H2BC15,H2BC14,H2BC9,H2BC17,H2BC21,H3C4,H2BC11,WDR5
12_Member	Reactome Gene Sets	R-HSA-8936459	RUNX1 regulates genes involved in megakaryocyte differentiation and platelet function	-3.29941	-1.63341	13/97	3012,3017,3018,8340,8341,8342,8345,8348,8349,8351,8850,8970,11091	H2AC8,H2BC5,H2BC3,H2BC13,H2BC15,H2BC14,H2BC9,H2BC17,H2BC21,H3C4,KAT2B,H2BC11,WDR5
12_Member	Reactome Gene Sets	R-HSA-211000	Gene Silencing by RNA	-3.27115	-1.61381	16/136	3012,3017,3018,5441,8340,8341,8342,8345,8348,8349,8351,8970,10526,11097,55706,122402	H2AC8,H2BC5,H2BC3,POLR2L,H2BC13,H2BC15,H2BC14,H2BC9,H2BC17,H2BC21,H3C4,H2BC11,IPO8,NUP42,NDC1,TDRD9
12_Member	Reactome Gene Sets	R-HSA-606279	Deposition of new CENPA-containing nucleosomes at the centromere	-3.26108	-1.60547	11/74	1060,3012,3017,3018,8340,8341,8342,8345,8348,8349,8970	CENPC,H2AC8,H2BC5,H2BC3,H2BC13,H2BC15,H2BC14,H2BC9,H2BC17,H2BC21,H2BC11
12_Member	Reactome Gene Sets	R-HSA-774815	Nucleosome assembly	-3.26108	-1.60547	11/74	1060,3012,3017,3018,8340,8341,8342,8345,8348,8349,8970	CENPC,H2AC8,H2BC5,H2BC3,H2BC13,H2BC15,H2BC14,H2BC9,H2BC17,H2BC21,H2BC11
12_Member	Reactome Gene Sets	R-HSA-73929	Base-Excision Repair, AP Site Formation	-3.24429	-1.5921	10/63	3012,3017,3018,8340,8341,8342,8345,8348,8349,8970	H2AC8,H2BC5,H2BC3,H2BC13,H2BC15,H2BC14,H2BC9,H2BC17,H2BC21,H2BC11
12_Member	Reactome Gene Sets	R-HSA-5693538	Homology Directed Repair	-3.20087	-1.56213	16/138	3017,3018,3364,3980,4361,7158,7336,8340,8341,8342,8345,8348,8349,8970,9577,63967	H2BC5,H2BC3,HUS1,LIG3,MRE11,TP53BP1,UBE2V2,H2BC13,H2BC15,H2BC14,H2BC9,H2BC17,H2BC21,H2BC11,BABAM2,CLSPN
12_Member	KEGG Pathway	hsa05203	Viral carcinogenesis	-3.10674	-1.48857	21/211	1026,1030,1960,2965,2967,3017,3018,5296,5423,5594,5922,7529,8340,8341,8342,8345,8348,8349,8850,8970,158983	CDKN1A,CDKN2B,EGR3,GTF2H1,GTF2H3,H2BC5,H2BC3,PIK3R2,POLB,MAPK1,RASA2,YWHAB,H2BC13,H2BC15,H2BC14,H2BC9,H2BC17,H2BC21,KAT2B,H2BC11,H2BW1
12_Member	GO Biological Processes	GO:0034728	nucleosome organization	-3.08602	-1.47384	19/183	676,1060,3006,3017,3018,8340,8341,8342,8345,8348,8349,8351,8970,23523,81611,128854,158983,373861,474381	BRDT,CENPC,H1-2,H2BC5,H2BC3,H2BC13,H2BC15,H2BC14,H2BC9,H2BC17,H2BC21,H3C4,H2BC11,CABIN1,ANP32E,TSPY26P,H2BW1,H1-9P,H2AB2
12_Member	Reactome Gene Sets	R-HSA-73884	Base Excision Repair	-2.98335	-1.39823	12/92	3012,3017,3018,3980,5423,8340,8341,8342,8345,8348,8349,8970	H2AC8,H2BC5,H2BC3,LIG3,POLB,H2BC13,H2BC15,H2BC14,H2BC9,H2BC17,H2BC21,H2BC11
12_Member	Reactome Gene Sets	R-HSA-5693567	HDR through Homologous Recombination (HRR) or Single Strand Annealing (SSA)	-2.94718	-1.37008	15/132	3017,3018,3364,4361,7158,7336,8340,8341,8342,8345,8348,8349,8970,9577,63967	H2BC5,H2BC3,HUS1,MRE11,TP53BP1,UBE2V2,H2BC13,H2BC15,H2BC14,H2BC9,H2BC17,H2BC21,H2BC11,BABAM2,CLSPN
12_Member	Reactome Gene Sets	R-HSA-9609646	HCMV Infection	-2.93251	-1.36268	17/160	3012,3017,3018,8340,8341,8342,8345,8348,8349,8351,8969,8970,10951,11097,55706,317772,347733	H2AC8,H2BC5,H2BC3,H2BC13,H2BC15,H2BC14,H2BC9,H2BC17,H2BC21,H3C4,H2AC11,H2BC11,CBX1,NUP42,NDC1,H2AC21,TUBB2B
12_Member	Reactome Gene Sets	R-HSA-1912422	Pre-NOTCH Expression and Processing	-2.81913	-1.2758	13/109	3012,3017,3018,4853,8340,8341,8342,8345,8348,8349,8351,8850,8970	H2AC8,H2BC5,H2BC3,NOTCH2,H2BC13,H2BC15,H2BC14,H2BC9,H2BC17,H2BC21,H3C4,KAT2B,H2BC11
12_Member	Reactome Gene Sets	R-HSA-977225	Amyloid fiber formation	-2.7828	-1.2541	13/110	3012,3017,3018,4878,8340,8341,8342,8345,8348,8349,8351,8970,54959	H2AC8,H2BC5,H2BC3,NPPA,H2BC13,H2BC15,H2BC14,H2BC9,H2BC17,H2BC21,H3C4,H2BC11,ODAM
12_Member	Reactome Gene Sets	R-HSA-194315	Signaling by Rho GTPases	-2.73917	-1.22907	36/466	2,395,613,1060,1730,2909,3012,3017,3018,3326,4628,4983,5058,5296,5516,5579,5594,5747,5905,7204,7529,8340,8341,8342,8345,8348,8349,8351,8970,9459,10152,11214,51209,85415,347733,348235	A2M,ARHGAP6,BCR,CENPC,DIAPH2,ARHGAP35,H2AC8,H2BC5,H2BC3,HSP90AB1,MYH10,OPHN1,PAK1,PIK3R2,PPP2CB,PRKCB,MAPK1,PTK2,RANGAP1,TRIO,YWHAB,H2BC13,H2BC15,H2BC14,H2BC9,H2BC17,H2BC21,H3C4,H2BC11,ARHGEF6,ABI2,AKAP13,RAB9B,RHPN2,TUBB2B,SKA2
12_Member	GO Biological Processes	GO:0031497	chromatin assembly	-2.72988	-1.22039	17/167	1060,3006,3017,3018,8340,8341,8342,8345,8348,8349,8351,8970,23523,128854,158983,373861,474381	CENPC,H1-2,H2BC5,H2BC3,H2BC13,H2BC15,H2BC14,H2BC9,H2BC17,H2BC21,H3C4,H2BC11,CABIN1,TSPY26P,H2BW1,H1-9P,H2AB2
12_Member	Reactome Gene Sets	R-HSA-8939236	RUNX1 regulates transcription of genes involved in differentiation of HSCs	-2.5686	-1.09843	14/130	3012,3017,3018,4602,8340,8341,8342,8345,8348,8349,8351,8861,8970,10413	H2AC8,H2BC5,H2BC3,MYB,H2BC13,H2BC15,H2BC14,H2BC9,H2BC17,H2BC21,H3C4,LDB1,H2BC11,YAP1
12_Member	Reactome Gene Sets	R-HSA-1500620	Meiosis	-2.51005	-1.06601	13/118	3012,3017,3018,4361,8340,8341,8342,8345,8348,8349,8351,8970,11144	H2AC8,H2BC5,H2BC3,MRE11,H2BC13,H2BC15,H2BC14,H2BC9,H2BC17,H2BC21,H3C4,H2BC11,DMC1
12_Member	Reactome Gene Sets	R-HSA-1221632	Meiotic synapsis	-2.47969	-1.04299	10/79	3012,3017,3018,8340,8341,8342,8345,8348,8349,8970	H2AC8,H2BC5,H2BC3,H2BC13,H2BC15,H2BC14,H2BC9,H2BC17,H2BC21,H2BC11
12_Member	GO Biological Processes	GO:0006333	chromatin assembly or disassembly	-2.46363	-1.03055	18/192	1060,1107,3006,3017,3018,8340,8341,8342,8345,8348,8349,8351,8970,23523,128854,158983,373861,474381	CENPC,CHD3,H1-2,H2BC5,H2BC3,H2BC13,H2BC15,H2BC14,H2BC9,H2BC17,H2BC21,H3C4,H2BC11,CABIN1,TSPY26P,H2BW1,H1-9P,H2AB2
12_Member	GO Biological Processes	GO:0065004	protein-DNA complex assembly	-2.3789	-0.966652	21/242	1060,2965,2967,3006,3017,3018,8340,8341,8342,8345,8348,8349,8351,8450,8970,11144,23523,128854,158983,373861,474381	CENPC,GTF2H1,GTF2H3,H1-2,H2BC5,H2BC3,H2BC13,H2BC15,H2BC14,H2BC9,H2BC17,H2BC21,H3C4,CUL4B,H2BC11,DMC1,CABIN1,TSPY26P,H2BW1,H1-9P,H2AB2
12_Member	Reactome Gene Sets	R-HSA-69481	G2/M Checkpoints	-2.31683	-0.922653	16/168	3017,3018,3364,4361,7158,7336,7529,8340,8341,8342,8345,8348,8349,8970,9577,63967	H2BC5,H2BC3,HUS1,MRE11,TP53BP1,UBE2V2,YWHAB,H2BC13,H2BC15,H2BC14,H2BC9,H2BC17,H2BC21,H2BC11,BABAM2,CLSPN
12_Member	Reactome Gene Sets	R-HSA-157579	Telomere Maintenance	-2.23046	-0.853824	12/113	3012,3017,3018,5441,8340,8341,8342,8345,8348,8349,8970,100134934	H2AC8,H2BC5,H2BC3,POLR2L,H2BC13,H2BC15,H2BC14,H2BC9,H2BC17,H2BC21,H2BC11,TEN1
12_Member	GO Biological Processes	GO:0071824	protein-DNA complex subunit organization	-2.2237	-0.848419	23/282	676,1060,2965,2967,3006,3017,3018,8340,8341,8342,8345,8348,8349,8351,8450,8970,11144,23523,81611,128854,158983,373861,474381	BRDT,CENPC,GTF2H1,GTF2H3,H1-2,H2BC5,H2BC3,H2BC13,H2BC15,H2BC14,H2BC9,H2BC17,H2BC21,H3C4,CUL4B,H2BC11,DMC1,CABIN1,ANP32E,TSPY26P,H2BW1,H1-9P,H2AB2
12_Member	Reactome Gene Sets	R-HSA-157118	Signaling by NOTCH	-2.18056	-0.823728	20/236	408,1024,1272,2173,3012,3017,3018,4853,7088,8340,8341,8342,8345,8348,8349,8351,8850,8970,23286,388585	ARRB1,CDK8,CNTN1,FABP7,H2AC8,H2BC5,H2BC3,NOTCH2,TLE1,H2BC13,H2BC15,H2BC14,H2BC9,H2BC17,H2BC21,H3C4,KAT2B,H2BC11,WWC1,HES5
12_Member	GO Biological Processes	GO:0071103	DNA conformation change	-2.08647	-0.754505	25/323	1060,1107,2965,2967,3006,3017,3018,3087,4361,8340,8341,8342,8345,8348,8349,8351,8450,8970,10973,23523,84083,128854,158983,373861,474381	CENPC,CHD3,GTF2H1,GTF2H3,H1-2,H2BC5,H2BC3,HHEX,MRE11,H2BC13,H2BC15,H2BC14,H2BC9,H2BC17,H2BC21,H3C4,CUL4B,H2BC11,ASCC3,CABIN1,ZRANB3,TSPY26P,H2BW1,H1-9P,H2AB2
12_Member	Reactome Gene Sets	R-HSA-195258	RHO GTPase Effectors	-2.0227	-0.718788	25/327	1060,1730,3012,3017,3018,4628,5058,5516,5579,5594,5747,5905,7529,8340,8341,8342,8345,8348,8349,8351,8970,10152,85415,347733,348235	CENPC,DIAPH2,H2AC8,H2BC5,H2BC3,MYH10,PAK1,PPP2CB,PRKCB,MAPK1,PTK2,RANGAP1,YWHAB,H2BC13,H2BC15,H2BC14,H2BC9,H2BC17,H2BC21,H3C4,H2BC11,ABI2,RHPN2,TUBB2B,SKA2
13_Summary	KEGG Pathway	ko04080	Neuroactive ligand-receptor interaction	-7.6695	-5.0266	36/277	117,152,1813,1901,1910,2555,2556,2558,2560,2562,2565,2690,2742,2890,2897,2898,2904,2905,2915,2918,3350,3358,3360,4544,4886,5021,5618,5645,5733,6751,6752,7068,8001,10888,23620,56288,51,477,482,493,814,817,2737,5058,5139,5296,5348,5594,8310,10257,11069,22800,4878,5443,183,1325,5173,54741	ADCYAP1R1,ADRA2C,DRD2,S1PR1,EDNRB,GABRA2,GABRA3,GABRA5,GABRB1,GABRB3,GABRG1,GHR,GLRA2,GRIA1,GRIK1,GRIK2,GRIN2B,GRIN2C,GRM5,GRM8,HTR1A,HTR2C,HTR4,MTNR1B,NPY1R,OXTR,PRLR,PRSS2,PTGER3,SSTR1,SSTR2,THRB,GLRA3,GPR83,NTSR2,PARD3,ACOX1,ATP1A2,ATP1B2,ATP2B4,CAMK4,CAMK2D,GLI3,PAK1,PDE3A,PIK3R2,FXYD1,MAPK1,ACOX3,ABCC4,RAPGEF4,RRAS2,NPPA,POMC,AGT,CORT,PDYN,LEPROT
13_Member	KEGG Pathway	ko04080	Neuroactive ligand-receptor interaction	-7.6695	-5.0266	36/277	117,152,1813,1901,1910,2555,2556,2558,2560,2562,2565,2690,2742,2890,2897,2898,2904,2905,2915,2918,3350,3358,3360,4544,4886,5021,5618,5645,5733,6751,6752,7068,8001,10888,23620,56288	ADCYAP1R1,ADRA2C,DRD2,S1PR1,EDNRB,GABRA2,GABRA3,GABRA5,GABRB1,GABRB3,GABRG1,GHR,GLRA2,GRIA1,GRIK1,GRIK2,GRIN2B,GRIN2C,GRM5,GRM8,HTR1A,HTR2C,HTR4,MTNR1B,NPY1R,OXTR,PRLR,PRSS2,PTGER3,SSTR1,SSTR2,THRB,GLRA3,GPR83,NTSR2,PARD3
13_Member	KEGG Pathway	ko04024	cAMP signaling pathway	-6.88111	-4.34175	28/198	51,117,477,482,493,814,817,1813,2737,2890,2904,2905,3350,3360,4886,5021,5058,5139,5296,5348,5594,5733,6751,6752,8310,10257,11069,22800	ACOX1,ADCYAP1R1,ATP1A2,ATP1B2,ATP2B4,CAMK4,CAMK2D,DRD2,GLI3,GRIA1,GRIN2B,GRIN2C,HTR1A,HTR4,NPY1R,OXTR,PAK1,PDE3A,PIK3R2,FXYD1,MAPK1,PTGER3,SSTR1,SSTR2,ACOX3,ABCC4,RAPGEF4,RRAS2
13_Member	KEGG Pathway	hsa04024	cAMP signaling pathway	-6.70617	-4.2046	30/226	51,117,477,482,493,814,817,1813,2737,2890,2904,2905,3350,3360,4878,4886,5021,5058,5139,5296,5348,5443,5594,5733,6751,6752,8310,10257,11069,22800	ACOX1,ADCYAP1R1,ATP1A2,ATP1B2,ATP2B4,CAMK4,CAMK2D,DRD2,GLI3,GRIA1,GRIN2B,GRIN2C,HTR1A,HTR4,NPPA,NPY1R,OXTR,PAK1,PDE3A,PIK3R2,FXYD1,POMC,MAPK1,PTGER3,SSTR1,SSTR2,ACOX3,ABCC4,RAPGEF4,RRAS2
13_Member	KEGG Pathway	hsa04080	Neuroactive ligand-receptor interaction	-6.58061	-4.12204	41/373	117,152,183,1325,1813,1901,1910,2555,2556,2558,2560,2562,2565,2690,2742,2890,2897,2898,2904,2905,2915,2918,3350,3358,3360,4544,4886,5021,5173,5443,5618,5645,5733,6751,6752,7068,8001,10888,23620,54741,56288	ADCYAP1R1,ADRA2C,AGT,CORT,DRD2,S1PR1,EDNRB,GABRA2,GABRA3,GABRA5,GABRB1,GABRB3,GABRG1,GHR,GLRA2,GRIA1,GRIK1,GRIK2,GRIN2B,GRIN2C,GRM5,GRM8,HTR1A,HTR2C,HTR4,MTNR1B,NPY1R,OXTR,PDYN,POMC,PRLR,PRSS2,PTGER3,SSTR1,SSTR2,THRB,GLRA3,GPR83,NTSR2,LEPROT,PARD3
14_Summary	GO Biological Processes	GO:0023061	signal release	-7.36621	-4.74767	48/444	152,183,320,1374,1813,2054,2182,2697,2746,3350,3358,3709,4087,4544,4602,5443,5579,5582,5991,6623,6659,6664,6854,7849,8447,8609,8660,8773,9066,9256,9342,9379,10675,10814,11069,22999,23025,23410,23413,25924,26059,27445,60482,80223,80331,143425,252983,594855,348,3156,3479,4218,4628,5021,5872,5874,5898,7099,7430,7879,51760,376267,596,2039,2534,2737,3326,5058,5296,5534,5569,5594,5905,7159,7529,9495,10…	ADRA2C,AGT,APBA1,CPT1A,DRD2,STX2,ACSL4,GJA1,GLUD1,HTR1A,HTR2C,ITPR2,SMAD2,MTNR1B,MYB,POMC,PRKCB,PRKCG,RFX3,SNCG,SOX4,SOX11,SYN2,PAX8,DOC2B,KLF7,IRS2,SNAP23,SYT7,TSPOAP1,SNAP29,NRXN2,CSPG5,CPLX2,RAPGEF4,RIMS1,UNC13A,SIRT3,NCS1,MYRIP,ERC2,PCLO,SLC5A7,RAB11FIP1,DNAJC5,SYT9,STXBP4,CPLX3,APOE,HMGCR,IGF1,RAB8A,MYH10,OXTR,RAB13,RAB27B,RALA,TLR4,EZR,RAB7A,SYT17,RAB15,BCL2,DMTN,FYN,GLI3,HSP90AB1,PAK1,PIK3…
14_Member	GO Biological Processes	GO:0023061	signal release	-7.36621	-4.74767	48/444	152,183,320,1374,1813,2054,2182,2697,2746,3350,3358,3709,4087,4544,4602,5443,5579,5582,5991,6623,6659,6664,6854,7849,8447,8609,8660,8773,9066,9256,9342,9379,10675,10814,11069,22999,23025,23410,23413,25924,26059,27445,60482,80223,80331,143425,252983,594855	ADRA2C,AGT,APBA1,CPT1A,DRD2,STX2,ACSL4,GJA1,GLUD1,HTR1A,HTR2C,ITPR2,SMAD2,MTNR1B,MYB,POMC,PRKCB,PRKCG,RFX3,SNCG,SOX4,SOX11,SYN2,PAX8,DOC2B,KLF7,IRS2,SNAP23,SYT7,TSPOAP1,SNAP29,NRXN2,CSPG5,CPLX2,RAPGEF4,RIMS1,UNC13A,SIRT3,NCS1,MYRIP,ERC2,PCLO,SLC5A7,RAB11FIP1,DNAJC5,SYT9,STXBP4,CPLX3
14_Member	GO Biological Processes	GO:1903530	regulation of secretion by cell	-5.38794	-3.22216	51/565	152,183,320,348,1374,1813,2182,2697,2746,3156,3350,3358,3479,3709,4218,4544,4602,4628,5021,5443,5579,5582,5872,5874,5898,5991,6623,6659,6664,7099,7430,7849,7879,8447,8609,8660,9066,10675,10814,11069,22999,23410,23413,25924,27445,51760,80223,143425,252983,376267,594855	ADRA2C,AGT,APBA1,APOE,CPT1A,DRD2,ACSL4,GJA1,GLUD1,HMGCR,HTR1A,HTR2C,IGF1,ITPR2,RAB8A,MTNR1B,MYB,MYH10,OXTR,POMC,PRKCB,PRKCG,RAB13,RAB27B,RALA,RFX3,SNCG,SOX4,SOX11,TLR4,EZR,PAX8,RAB7A,DOC2B,KLF7,IRS2,SYT7,CSPG5,CPLX2,RAPGEF4,RIMS1,SIRT3,NCS1,MYRIP,PCLO,SYT17,RAB11FIP1,SYT9,STXBP4,RAB15,CPLX3
14_Member	GO Biological Processes	GO:0070201	regulation of establishment of protein localization	-4.89438	-2.82482	50/573	152,348,596,1374,1813,2039,2182,2534,2697,2737,2746,3156,3326,3479,3709,4218,4544,4628,5058,5296,5534,5569,5594,5905,5991,6659,7099,7159,7430,7529,8447,8609,8660,9066,9495,10075,10178,11069,23410,25924,51100,51366,51715,54741,55677,56681,80223,85459,143425,252983	ADRA2C,APOE,BCL2,CPT1A,DRD2,DMTN,ACSL4,FYN,GJA1,GLI3,GLUD1,HMGCR,HSP90AB1,IGF1,ITPR2,RAB8A,MTNR1B,MYH10,PAK1,PIK3R2,PPP3R1,PKIA,MAPK1,RANGAP1,RFX3,SOX4,TLR4,TP53BP2,EZR,YWHAB,DOC2B,KLF7,IRS2,SYT7,AKAP5,HUWE1,TENM1,RAPGEF4,SIRT3,MYRIP,SH3GLB1,UBR5,RAB23,LEPROT,IWS1,SAR1A,RAB11FIP1,CEP295,SYT9,STXBP4
14_Member	GO Biological Processes	GO:0051046	regulation of secretion	-4.84146	-2.79642	53/623	152,183,320,348,1374,1813,1910,2182,2697,2746,3156,3350,3358,3479,3709,4218,4544,4602,4628,5021,5443,5579,5582,5733,5872,5874,5898,5991,6623,6659,6664,7099,7430,7849,7879,8447,8609,8660,9066,10675,10814,11069,22999,23410,23413,25924,27445,51760,80223,143425,252983,376267,594855	ADRA2C,AGT,APBA1,APOE,CPT1A,DRD2,EDNRB,ACSL4,GJA1,GLUD1,HMGCR,HTR1A,HTR2C,IGF1,ITPR2,RAB8A,MTNR1B,MYB,MYH10,OXTR,POMC,PRKCB,PRKCG,PTGER3,RAB13,RAB27B,RALA,RFX3,SNCG,SOX4,SOX11,TLR4,EZR,PAX8,RAB7A,DOC2B,KLF7,IRS2,SYT7,CSPG5,CPLX2,RAPGEF4,RIMS1,SIRT3,NCS1,MYRIP,PCLO,SYT17,RAB11FIP1,SYT9,STXBP4,RAB15,CPLX3
14_Member	GO Biological Processes	GO:0009306	protein secretion	-4.66709	-2.65844	36/370	152,348,1374,1813,2039,2182,2697,2746,3156,3479,3709,4087,4218,4544,4628,5872,5991,6623,6659,7099,7430,8447,8609,8660,9066,11069,23410,25924,27445,79158,80223,143425,153339,252983,376267,594855	ADRA2C,APOE,CPT1A,DRD2,DMTN,ACSL4,GJA1,GLUD1,HMGCR,IGF1,ITPR2,SMAD2,RAB8A,MTNR1B,MYH10,RAB13,RFX3,SNCG,SOX4,TLR4,EZR,DOC2B,KLF7,IRS2,SYT7,RAPGEF4,SIRT3,MYRIP,PCLO,GNPTAB,RAB11FIP1,SYT9,TMEM167A,STXBP4,RAB15,CPLX3
14_Member	GO Biological Processes	GO:0010817	regulation of hormone levels	-4.65146	-2.64858	47/538	152,183,223,1374,1813,2182,2690,2697,2746,3350,3358,3709,4087,4204,4544,4602,5156,5443,5446,5991,6659,6664,6718,7421,7849,8447,8609,8660,8773,8854,9066,9256,11069,23410,25924,27445,53919,56603,59342,60482,79644,80223,83930,112812,143425,252983,594855	ADRA2C,AGT,ALDH9A1,CPT1A,DRD2,ACSL4,GHR,GJA1,GLUD1,HTR1A,HTR2C,ITPR2,SMAD2,MECP2,MTNR1B,MYB,PDGFRA,POMC,PON3,RFX3,SOX4,SOX11,AKR1D1,VDR,PAX8,DOC2B,KLF7,IRS2,SNAP23,ALDH1A2,SYT7,TSPOAP1,RAPGEF4,SIRT3,MYRIP,PCLO,SLCO1C1,CYP26B1,SCPEP1,SLC5A7,SRD5A3,RAB11FIP1,STARD3NL,FDX2,SYT9,STXBP4,CPLX3
14_Member	GO Biological Processes	GO:0002790	peptide secretion	-4.56287	-2.57459	38/404	152,348,1374,1813,2039,2182,2697,2746,3156,3358,3479,3709,4087,4218,4544,4628,5872,5991,6623,6659,7099,7430,7849,8447,8609,8660,9066,11069,23410,25924,27445,79158,80223,143425,153339,252983,376267,594855	ADRA2C,APOE,CPT1A,DRD2,DMTN,ACSL4,GJA1,GLUD1,HMGCR,HTR2C,IGF1,ITPR2,SMAD2,RAB8A,MTNR1B,MYH10,RAB13,RFX3,SNCG,SOX4,TLR4,EZR,PAX8,DOC2B,KLF7,IRS2,SYT7,RAPGEF4,SIRT3,MYRIP,PCLO,GNPTAB,RAB11FIP1,SYT9,TMEM167A,STXBP4,RAB15,CPLX3
14_Member	GO Biological Processes	GO:0009914	hormone transport	-4.39709	-2.45107	32/322	152,183,1374,1813,2182,2697,2746,3350,3358,3709,4087,4544,4602,5443,5991,6659,6664,7849,8447,8609,8660,8773,9066,11069,23410,25924,27445,53919,80223,143425,252983,594855	ADRA2C,AGT,CPT1A,DRD2,ACSL4,GJA1,GLUD1,HTR1A,HTR2C,ITPR2,SMAD2,MTNR1B,MYB,POMC,RFX3,SOX4,SOX11,PAX8,DOC2B,KLF7,IRS2,SNAP23,SYT7,RAPGEF4,SIRT3,MYRIP,PCLO,SLCO1C1,RAB11FIP1,SYT9,STXBP4,CPLX3
14_Member	GO Biological Processes	GO:0046879	hormone secretion	-4.35743	-2.42989	31/309	152,183,1374,1813,2182,2697,2746,3350,3358,3709,4087,4544,4602,5443,5991,6659,6664,7849,8447,8609,8660,8773,9066,11069,23410,25924,27445,80223,143425,252983,594855	ADRA2C,AGT,CPT1A,DRD2,ACSL4,GJA1,GLUD1,HTR1A,HTR2C,ITPR2,SMAD2,MTNR1B,MYB,POMC,RFX3,SOX4,SOX11,PAX8,DOC2B,KLF7,IRS2,SNAP23,SYT7,RAPGEF4,SIRT3,MYRIP,PCLO,RAB11FIP1,SYT9,STXBP4,CPLX3
14_Member	GO Biological Processes	GO:0090087	regulation of peptide transport	-4.27825	-2.36806	47/557	152,348,1374,1813,2039,2182,2534,2697,2737,2746,3156,3326,3358,3479,3709,4218,4544,4628,5058,5296,5569,5594,5905,5991,6659,7099,7430,7849,8447,8609,8660,9066,9495,10075,10178,11069,23410,25924,51100,51366,51715,54741,55677,56681,80223,143425,252983	ADRA2C,APOE,CPT1A,DRD2,DMTN,ACSL4,FYN,GJA1,GLI3,GLUD1,HMGCR,HSP90AB1,HTR2C,IGF1,ITPR2,RAB8A,MTNR1B,MYH10,PAK1,PIK3R2,PKIA,MAPK1,RANGAP1,RFX3,SOX4,TLR4,EZR,PAX8,DOC2B,KLF7,IRS2,SYT7,AKAP5,HUWE1,TENM1,RAPGEF4,SIRT3,MYRIP,SH3GLB1,UBR5,RAB23,LEPROT,IWS1,SAR1A,RAB11FIP1,SYT9,STXBP4
14_Member	GO Biological Processes	GO:0051223	regulation of protein transport	-4.26339	-2.359	45/526	152,348,1374,1813,2039,2182,2534,2697,2737,2746,3156,3326,3479,3709,4218,4544,4628,5058,5296,5569,5594,5905,5991,6659,7099,7430,8447,8609,8660,9066,9495,10075,10178,11069,23410,25924,51100,51366,51715,54741,55677,56681,80223,143425,252983	ADRA2C,APOE,CPT1A,DRD2,DMTN,ACSL4,FYN,GJA1,GLI3,GLUD1,HMGCR,HSP90AB1,IGF1,ITPR2,RAB8A,MTNR1B,MYH10,PAK1,PIK3R2,PKIA,MAPK1,RANGAP1,RFX3,SOX4,TLR4,EZR,DOC2B,KLF7,IRS2,SYT7,AKAP5,HUWE1,TENM1,RAPGEF4,SIRT3,MYRIP,SH3GLB1,UBR5,RAB23,LEPROT,IWS1,SAR1A,RAB11FIP1,SYT9,STXBP4
14_Member	GO Biological Processes	GO:0046883	regulation of hormone secretion	-3.93451	-2.10469	27/267	152,183,1374,1813,2182,2697,2746,3350,3358,3709,4544,4602,5443,5991,6659,6664,7849,8447,8609,8660,9066,11069,23410,25924,80223,143425,252983	ADRA2C,AGT,CPT1A,DRD2,ACSL4,GJA1,GLUD1,HTR1A,HTR2C,ITPR2,MTNR1B,MYB,POMC,RFX3,SOX4,SOX11,PAX8,DOC2B,KLF7,IRS2,SYT7,RAPGEF4,SIRT3,MYRIP,RAB11FIP1,SYT9,STXBP4
14_Member	GO Biological Processes	GO:1904951	positive regulation of establishment of protein localization	-3.80607	-2.01419	31/331	596,1813,2182,2534,2697,2737,2746,3326,3479,4628,5058,5296,5534,5594,6659,7099,7159,7430,7529,8447,8660,9495,10075,10178,23410,25924,51100,51366,54741,56681,85459	BCL2,DRD2,ACSL4,FYN,GJA1,GLI3,GLUD1,HSP90AB1,IGF1,MYH10,PAK1,PIK3R2,PPP3R1,MAPK1,SOX4,TLR4,TP53BP2,EZR,YWHAB,DOC2B,IRS2,AKAP5,HUWE1,TENM1,SIRT3,MYRIP,SH3GLB1,UBR5,LEPROT,SAR1A,CEP295
14_Member	GO Biological Processes	GO:0030073	insulin secretion	-3.62133	-1.86988	22/207	152,1374,1813,2182,2697,2746,3709,4087,4544,5991,6659,8447,8609,8660,9066,11069,23410,25924,27445,143425,252983,594855	ADRA2C,CPT1A,DRD2,ACSL4,GJA1,GLUD1,ITPR2,SMAD2,MTNR1B,RFX3,SOX4,DOC2B,KLF7,IRS2,SYT7,RAPGEF4,SIRT3,MYRIP,PCLO,SYT9,STXBP4,CPLX3
14_Member	GO Biological Processes	GO:0030072	peptide hormone secretion	-3.31239	-1.64456	24/247	152,1374,1813,2182,2697,2746,3358,3709,4087,4544,5991,6659,7849,8447,8609,8660,9066,11069,23410,25924,27445,143425,252983,594855	ADRA2C,CPT1A,DRD2,ACSL4,GJA1,GLUD1,HTR2C,ITPR2,SMAD2,MTNR1B,RFX3,SOX4,PAX8,DOC2B,KLF7,IRS2,SYT7,RAPGEF4,SIRT3,MYRIP,PCLO,SYT9,STXBP4,CPLX3
14_Member	GO Biological Processes	GO:0050796	regulation of insulin secretion	-3.23318	-1.5831	19/178	152,1374,1813,2182,2697,2746,3709,4544,5991,6659,8447,8609,8660,9066,11069,23410,25924,143425,252983	ADRA2C,CPT1A,DRD2,ACSL4,GJA1,GLUD1,ITPR2,MTNR1B,RFX3,SOX4,DOC2B,KLF7,IRS2,SYT7,RAPGEF4,SIRT3,MYRIP,SYT9,STXBP4
14_Member	GO Biological Processes	GO:0002791	regulation of peptide secretion	-3.22455	-1.57661	28/311	152,348,1374,1813,2182,2697,2746,3156,3358,3479,3709,4544,4628,5991,6659,7099,7430,7849,8447,8609,8660,9066,11069,23410,25924,80223,143425,252983	ADRA2C,APOE,CPT1A,DRD2,ACSL4,GJA1,GLUD1,HMGCR,HTR2C,IGF1,ITPR2,MTNR1B,MYH10,RFX3,SOX4,TLR4,EZR,PAX8,DOC2B,KLF7,IRS2,SYT7,RAPGEF4,SIRT3,MYRIP,RAB11FIP1,SYT9,STXBP4
14_Member	GO Biological Processes	GO:0050708	regulation of protein secretion	-3.18975	-1.5543	26/282	152,348,1374,1813,2182,2697,2746,3156,3479,3709,4544,4628,5991,6659,7099,7430,8447,8609,8660,9066,11069,23410,25924,80223,143425,252983	ADRA2C,APOE,CPT1A,DRD2,ACSL4,GJA1,GLUD1,HMGCR,IGF1,ITPR2,MTNR1B,MYH10,RFX3,SOX4,TLR4,EZR,DOC2B,KLF7,IRS2,SYT7,RAPGEF4,SIRT3,MYRIP,RAB11FIP1,SYT9,STXBP4
14_Member	GO Biological Processes	GO:0090276	regulation of peptide hormone secretion	-3.1604	-1.53228	21/209	152,1374,1813,2182,2697,2746,3358,3709,4544,5991,6659,7849,8447,8609,8660,9066,11069,23410,25924,143425,252983	ADRA2C,CPT1A,DRD2,ACSL4,GJA1,GLUD1,HTR2C,ITPR2,MTNR1B,RFX3,SOX4,PAX8,DOC2B,KLF7,IRS2,SYT7,RAPGEF4,SIRT3,MYRIP,SYT9,STXBP4
14_Member	GO Biological Processes	GO:0051222	positive regulation of protein transport	-2.94618	-1.37008	26/293	1813,2182,2534,2697,2737,2746,3326,3479,4628,5058,5296,5594,6659,7099,7430,8447,8660,9495,10075,10178,23410,25924,51100,51366,54741,56681	DRD2,ACSL4,FYN,GJA1,GLI3,GLUD1,HSP90AB1,IGF1,MYH10,PAK1,PIK3R2,MAPK1,SOX4,TLR4,EZR,DOC2B,IRS2,AKAP5,HUWE1,TENM1,SIRT3,MYRIP,SH3GLB1,UBR5,LEPROT,SAR1A
14_Member	GO Biological Processes	GO:1903532	positive regulation of secretion by cell	-2.20151	-0.833383	22/267	1813,2182,2697,2746,3479,4602,4628,5021,5874,6659,6664,7099,7430,7879,8447,8660,9066,23410,23413,25924,143425,376267	DRD2,ACSL4,GJA1,GLUD1,IGF1,MYB,MYH10,OXTR,RAB27B,SOX4,SOX11,TLR4,EZR,RAB7A,DOC2B,IRS2,SYT7,SIRT3,NCS1,MYRIP,SYT9,RAB15
14_Member	GO Biological Processes	GO:0050714	positive regulation of protein secretion	-2.07251	-0.747033	13/133	1813,2182,2697,2746,3479,4628,6659,7099,7430,8447,8660,23410,25924	DRD2,ACSL4,GJA1,GLUD1,IGF1,MYH10,SOX4,TLR4,EZR,DOC2B,IRS2,SIRT3,MYRIP
15_Summary	GO Biological Processes	GO:0010721	negative regulation of cell development	-7.22004	-4.617	38/314	348,430,482,596,1630,1656,1809,1910,1948,2039,2066,2737,3479,4038,4133,4763,5058,5728,5802,6657,6664,7068,7101,7143,7225,7422,8831,9289,10220,23189,23251,55435,55558,84894,223117,359845,374946,388585,214,320,607,658,1002,1026,1813,1901,2261,2690,2697,3326,4087,4853,4886,5361,5594,6585,6586,7430,8904,9350,9362,10413,10611,11214,22941,22999,23025,23286,26053,51199,51760,55083,55364,57154,57502,5759…	APOE,ASCL2,ATP1B2,BCL2,DCC,DDX6,DPYSL3,EDNRB,EFNB2,DMTN,ERBB4,GLI3,IGF1,LRP4,MAP2,NF1,PAK1,PTEN,PTPRS,SOX2,SOX11,THRB,NR2E1,TNR,TRPC6,VEGFA,SYNGAP1,ADGRG1,GDF11,KANK1,MINAR1,AP1AR,PLXNA3,LINGO1,SEMA3D,RFLNB,DRAXIN,HES5,ALCAM,APBA1,BCL9,BMPR1B,CDH4,CDKN1A,DRD2,S1PR1,FGFR3,GHR,GJA1,HSP90AB1,SMAD2,NOTCH2,NPY1R,PLXNA1,MAPK1,SLIT1,SLIT3,EZR,CPNE1,CER1,CPNE6,YAP1,PDLIM5,AKAP13,SHANK2,RIMS1,UNC13A,WWC1,…
15_Member	GO Biological Processes	GO:0010721	negative regulation of cell development	-7.22004	-4.617	38/314	348,430,482,596,1630,1656,1809,1910,1948,2039,2066,2737,3479,4038,4133,4763,5058,5728,5802,6657,6664,7068,7101,7143,7225,7422,8831,9289,10220,23189,23251,55435,55558,84894,223117,359845,374946,388585	APOE,ASCL2,ATP1B2,BCL2,DCC,DDX6,DPYSL3,EDNRB,EFNB2,DMTN,ERBB4,GLI3,IGF1,LRP4,MAP2,NF1,PAK1,PTEN,PTPRS,SOX2,SOX11,THRB,NR2E1,TNR,TRPC6,VEGFA,SYNGAP1,ADGRG1,GDF11,KANK1,MINAR1,AP1AR,PLXNA3,LINGO1,SEMA3D,RFLNB,DRAXIN,HES5
15_Member	GO Biological Processes	GO:0048589	developmental growth	-6.9038	-4.35107	58/605	214,320,348,596,607,658,1002,1026,1630,1813,1901,2066,2261,2690,2697,2737,3326,3479,4038,4087,4133,4853,4886,5058,5361,5594,5728,5802,6585,6586,6657,7143,7422,7430,8904,9350,9362,10413,10611,11214,22941,22999,23025,23286,26053,51199,51760,55083,55364,55558,57154,57502,57599,57678,79647,150465,223117,374946	ALCAM,APBA1,APOE,BCL2,BCL9,BMPR1B,CDH4,CDKN1A,DCC,DRD2,S1PR1,ERBB4,FGFR3,GHR,GJA1,GLI3,HSP90AB1,IGF1,LRP4,SMAD2,MAP2,NOTCH2,NPY1R,PAK1,PLXNA1,MAPK1,PTEN,PTPRS,SLIT1,SLIT3,SOX2,TNR,VEGFA,EZR,CPNE1,CER1,CPNE6,YAP1,PDLIM5,AKAP13,SHANK2,RIMS1,UNC13A,WWC1,AUTS2,NIN,SYT17,KIF26B,IMPACT,PLXNA3,SMURF1,NLGN4X,WDR48,GPAM,AKIRIN1,TTL,SEMA3D,DRAXIN
15_Member	GO Biological Processes	GO:0048588	developmental cell growth	-6.35684	-3.96172	29/222	214,348,1002,1630,3326,3479,4133,5058,5361,5802,6585,6586,7143,7422,8904,9362,10611,11214,22999,23025,26053,51199,51760,55364,55558,57154,150465,223117,374946	ALCAM,APOE,CDH4,DCC,HSP90AB1,IGF1,MAP2,PAK1,PLXNA1,PTPRS,SLIT1,SLIT3,TNR,VEGFA,CPNE1,CPNE6,PDLIM5,AKAP13,RIMS1,UNC13A,AUTS2,NIN,SYT17,IMPACT,PLXNA3,SMURF1,TTL,SEMA3D,DRAXIN
15_Member	GO Biological Processes	GO:1990138	neuron projection extension	-6.26886	-3.88308	24/164	214,348,1002,3326,4133,5058,5361,5802,6585,6586,7143,7422,8904,9362,22999,23025,26053,51760,55364,55558,57154,150465,223117,374946	ALCAM,APOE,CDH4,HSP90AB1,MAP2,PAK1,PLXNA1,PTPRS,SLIT1,SLIT3,TNR,VEGFA,CPNE1,CPNE6,RIMS1,UNC13A,AUTS2,SYT17,IMPACT,PLXNA3,SMURF1,TTL,SEMA3D,DRAXIN
15_Member	GO Biological Processes	GO:0040008	regulation of growth	-6.25675	-3.87557	59/648	183,348,596,817,1002,1026,1032,1457,1630,1813,2066,2261,2273,2690,2697,3479,3488,4133,4489,4495,4496,4501,4502,4853,4886,5058,5594,5645,5728,5795,5802,6586,7143,7422,7430,9166,9362,10413,10675,11170,22999,23025,23251,23286,28956,30837,51754,51760,55558,57154,57678,84289,84312,84687,150465,223117,283219,340719,374946	AGT,APOE,BCL2,CAMK2D,CDH4,CDKN1A,CDKN2D,CSNK2A1,DCC,DRD2,ERBB4,FGFR3,FHL1,GHR,GJA1,IGF1,IGFBP5,MAP2,MT1A,MT1G,MT1H,MT1X,MT2A,NOTCH2,NPY1R,PAK1,MAPK1,PRSS2,PTEN,PTPRJ,PTPRS,SLIT3,TNR,VEGFA,EZR,EBAG9,CPNE6,YAP1,CSPG5,FAM107A,RIMS1,UNC13A,MINAR1,WWC1,LAMTOR2,SOCS7,TMEM8B,SYT17,PLXNA3,SMURF1,GPAM,ING5,BRMS1L,PPP1R9B,TTL,SEMA3D,KCTD21,NANOS1,DRAXIN
15_Member	GO Biological Processes	GO:0060560	developmental growth involved in morphogenesis	-6.2338	-3.85717	29/225	214,348,1002,1630,1901,3326,4133,5058,5361,5802,6585,6586,7143,7422,8904,9362,10413,22999,23025,26053,51199,51760,55083,55364,55558,57154,150465,223117,374946	ALCAM,APOE,CDH4,DCC,S1PR1,HSP90AB1,MAP2,PAK1,PLXNA1,PTPRS,SLIT1,SLIT3,TNR,VEGFA,CPNE1,CPNE6,YAP1,RIMS1,UNC13A,AUTS2,NIN,SYT17,KIF26B,IMPACT,PLXNA3,SMURF1,TTL,SEMA3D,DRAXIN
15_Member	GO Biological Processes	GO:0051961	negative regulation of nervous system development	-5.78835	-3.50499	33/289	348,430,482,1630,1656,1809,1910,1948,2066,2737,4038,4133,4763,5728,5802,6092,6585,6657,6664,7068,7101,7143,7225,8831,9289,10220,23189,23251,55558,84894,223117,374946,388585	APOE,ASCL2,ATP1B2,DCC,DDX6,DPYSL3,EDNRB,EFNB2,ERBB4,GLI3,LRP4,MAP2,NF1,PTEN,PTPRS,ROBO2,SLIT1,SOX2,SOX11,THRB,NR2E1,TNR,TRPC6,SYNGAP1,ADGRG1,GDF11,KANK1,MINAR1,PLXNA3,LINGO1,SEMA3D,DRAXIN,HES5
15_Member	GO Biological Processes	GO:0016049	cell growth	-5.77723	-3.50105	46/473	183,214,348,596,817,1002,1026,1032,1457,1630,2273,2697,3326,3479,3488,4133,5058,5361,5645,5795,5802,6585,6586,7143,7422,8904,9166,9362,10611,11170,11214,22999,23025,23251,26053,28956,51199,51760,55364,55558,57154,84687,150465,223117,340719,374946	AGT,ALCAM,APOE,BCL2,CAMK2D,CDH4,CDKN1A,CDKN2D,CSNK2A1,DCC,FHL1,GJA1,HSP90AB1,IGF1,IGFBP5,MAP2,PAK1,PLXNA1,PRSS2,PTPRJ,PTPRS,SLIT1,SLIT3,TNR,VEGFA,CPNE1,EBAG9,CPNE6,PDLIM5,FAM107A,AKAP13,RIMS1,UNC13A,MINAR1,AUTS2,LAMTOR2,NIN,SYT17,IMPACT,PLXNA3,SMURF1,PPP1R9B,TTL,SEMA3D,NANOS1,DRAXIN
15_Member	GO Biological Processes	GO:0050768	negative regulation of neurogenesis	-5.56126	-3.34537	31/269	348,430,482,1630,1656,1809,1910,1948,2066,2737,4038,4133,4763,5728,5802,6657,6664,7068,7101,7143,7225,8831,9289,10220,23189,23251,55558,84894,223117,374946,388585	APOE,ASCL2,ATP1B2,DCC,DDX6,DPYSL3,EDNRB,EFNB2,ERBB4,GLI3,LRP4,MAP2,NF1,PTEN,PTPRS,SOX2,SOX11,THRB,NR2E1,TNR,TRPC6,SYNGAP1,ADGRG1,GDF11,KANK1,MINAR1,PLXNA3,LINGO1,SEMA3D,DRAXIN,HES5
15_Member	GO Biological Processes	GO:0045926	negative regulation of growth	-5.01837	-2.91953	28/245	596,1026,1032,1630,2261,2273,2697,3488,4133,4489,4495,4496,4501,4502,4853,5058,5728,5795,5802,6586,7143,23251,23286,55558,84289,84687,223117,374946	BCL2,CDKN1A,CDKN2D,DCC,FGFR3,FHL1,GJA1,IGFBP5,MAP2,MT1A,MT1G,MT1H,MT1X,MT2A,NOTCH2,PAK1,PTEN,PTPRJ,PTPRS,SLIT3,TNR,MINAR1,WWC1,PLXNA3,ING5,PPP1R9B,SEMA3D,DRAXIN
15_Member	GO Biological Processes	GO:0045665	negative regulation of neuron differentiation	-4.85341	-2.80414	25/210	348,1630,1656,1809,1910,1948,2737,4038,4133,5728,5802,6657,7068,7101,7143,7225,8831,10220,23189,23251,55558,84894,223117,374946,388585	APOE,DCC,DDX6,DPYSL3,EDNRB,EFNB2,GLI3,LRP4,MAP2,PTEN,PTPRS,SOX2,THRB,NR2E1,TNR,TRPC6,SYNGAP1,GDF11,KANK1,MINAR1,PLXNA3,LINGO1,SEMA3D,DRAXIN,HES5
15_Member	GO Biological Processes	GO:0010771	negative regulation of cell morphogenesis involved in differentiation	-4.49509	-2.53064	15/96	1630,2039,4038,4133,5728,5802,7143,7225,8831,23189,55435,55558,84894,223117,374946	DCC,DMTN,LRP4,MAP2,PTEN,PTPRS,TNR,TRPC6,SYNGAP1,KANK1,AP1AR,PLXNA3,LINGO1,SEMA3D,DRAXIN
15_Member	GO Biological Processes	GO:0048638	regulation of developmental growth	-4.39709	-2.45107	32/322	348,596,1002,1026,1630,1813,2066,2261,2690,2697,3479,4133,4886,5058,5594,5728,5802,7143,7422,7430,9362,10413,22999,23025,23286,51760,55558,57154,57678,150465,223117,374946	APOE,BCL2,CDH4,CDKN1A,DCC,DRD2,ERBB4,FGFR3,GHR,GJA1,IGF1,MAP2,NPY1R,PAK1,MAPK1,PTEN,PTPRS,TNR,VEGFA,EZR,CPNE6,YAP1,RIMS1,UNC13A,WWC1,SYT17,PLXNA3,SMURF1,GPAM,TTL,SEMA3D,DRAXIN
15_Member	GO Biological Processes	GO:0048675	axon extension	-4.16786	-2.28317	16/114	214,348,1002,3326,4133,5058,5802,6585,6586,7143,7422,26053,55558,150465,223117,374946	ALCAM,APOE,CDH4,HSP90AB1,MAP2,PAK1,PTPRS,SLIT1,SLIT3,TNR,VEGFA,AUTS2,PLXNA3,TTL,SEMA3D,DRAXIN
15_Member	GO Biological Processes	GO:0045596	negative regulation of cell differentiation	-3.91983	-2.09496	57/742	348,430,482,596,1630,1656,1809,1910,1948,2039,2066,2202,2737,3479,3488,4038,4133,4204,4763,5058,5594,5728,5802,6657,6664,6935,7068,7099,7101,7143,7204,7225,7422,8831,8840,8861,9289,10220,10413,10979,23189,23251,51232,55365,55435,55558,79647,84059,84524,84525,84894,161742,202151,223117,359845,374946,388585	APOE,ASCL2,ATP1B2,BCL2,DCC,DDX6,DPYSL3,EDNRB,EFNB2,DMTN,ERBB4,EFEMP1,GLI3,IGF1,IGFBP5,LRP4,MAP2,MECP2,NF1,PAK1,MAPK1,PTEN,PTPRS,SOX2,SOX11,ZEB1,THRB,TLR4,NR2E1,TNR,TRIO,TRPC6,VEGFA,SYNGAP1,CCN4,LDB1,ADGRG1,GDF11,YAP1,FERMT2,KANK1,MINAR1,CRIM1,TMEM176A,AP1AR,PLXNA3,AKIRIN1,ADGRV1,ZC3H8,HOPX,LINGO1,SPRED1,RANBP3L,SEMA3D,RFLNB,DRAXIN,HES5
15_Member	GO Biological Processes	GO:0051129	negative regulation of cellular component organization	-3.82613	-2.02843	59/782	341,348,395,830,1630,1809,1901,1948,2039,2534,2904,3006,3479,3980,4038,4133,5203,5728,5802,5830,6092,6585,6711,7143,7225,7411,7422,7879,8831,8850,10075,10413,10471,11013,11091,11170,22823,23189,23251,29766,51339,51366,51657,54434,54550,55364,55435,55558,56890,64802,78990,84894,157922,223117,260434,286527,373861,374946,100134934	APOC1,APOE,ARHGAP6,CAPZA2,DCC,DPYSL3,S1PR1,EFNB2,DMTN,FYN,GRIN2B,H1-2,IGF1,LIG3,LRP4,MAP2,PFDN4,PTEN,PTPRS,PEX5,ROBO2,SLIT1,SPTBN1,TNR,TRPC6,VBP1,VEGFA,RAB7A,SYNGAP1,KAT2B,HUWE1,YAP1,PFDN6,TMSB15A,WDR5,FAM107A,MTF2,KANK1,MINAR1,TMOD3,DACT1,UBR5,STYXL1,SSH1,NECAB2,IMPACT,AP1AR,PLXNA3,MDM1,NMNAT1,OTUB2,LINGO1,CAMSAP1,SEMA3D,PYDC1,TMSB15B,H1-9P,DRAXIN,TEN1
15_Member	GO Biological Processes	GO:0001558	regulation of cell growth	-3.77432	-1.98944	36/409	183,348,596,817,1002,1026,1032,1457,1630,2273,2697,3479,3488,4133,5058,5645,5795,5802,6586,7143,7422,9166,9362,11170,22999,23025,23251,28956,51760,55558,57154,84687,150465,223117,340719,374946	AGT,APOE,BCL2,CAMK2D,CDH4,CDKN1A,CDKN2D,CSNK2A1,DCC,FHL1,GJA1,IGF1,IGFBP5,MAP2,PAK1,PRSS2,PTPRJ,PTPRS,SLIT3,TNR,VEGFA,EBAG9,CPNE6,FAM107A,RIMS1,UNC13A,MINAR1,LAMTOR2,SYT17,PLXNA3,SMURF1,PPP1R9B,TTL,SEMA3D,NANOS1,DRAXIN
15_Member	GO Biological Processes	GO:0050771	negative regulation of axonogenesis	-3.58753	-1.84667	11/68	1630,4038,4133,5728,5802,7143,8831,55558,84894,223117,374946	DCC,LRP4,MAP2,PTEN,PTPRS,TNR,SYNGAP1,PLXNA3,LINGO1,SEMA3D,DRAXIN
15_Member	GO Biological Processes	GO:0031345	negative regulation of cell projection organization	-3.4747	-1.75825	20/184	348,1630,1809,1948,2534,2904,4038,4133,5728,5802,7143,7225,8831,10413,23189,23251,55558,84894,223117,374946	APOE,DCC,DPYSL3,EFNB2,FYN,GRIN2B,LRP4,MAP2,PTEN,PTPRS,TNR,TRPC6,SYNGAP1,YAP1,KANK1,MINAR1,PLXNA3,LINGO1,SEMA3D,DRAXIN
15_Member	GO Biological Processes	GO:0010977	negative regulation of neuron projection development	-3.31679	-1.64799	17/148	348,1630,1809,1948,4038,4133,5728,5802,7143,7225,8831,23189,23251,55558,84894,223117,374946	APOE,DCC,DPYSL3,EFNB2,LRP4,MAP2,PTEN,PTPRS,TNR,TRPC6,SYNGAP1,KANK1,MINAR1,PLXNA3,LINGO1,SEMA3D,DRAXIN
15_Member	GO Biological Processes	GO:0048640	negative regulation of developmental growth	-2.81913	-1.2758	13/109	1026,1630,2261,2697,4133,5058,5728,5802,7143,23286,55558,223117,374946	CDKN1A,DCC,FGFR3,GJA1,MAP2,PAK1,PTEN,PTPRS,TNR,WWC1,PLXNA3,SEMA3D,DRAXIN
15_Member	GO Biological Processes	GO:0008361	regulation of cell size	-2.54137	-1.08494	17/174	348,361,1002,1630,3326,4133,5058,5728,5802,7143,7422,7430,23108,55558,150465,223117,374946	APOE,AQP4,CDH4,DCC,HSP90AB1,MAP2,PAK1,PTEN,PTPRS,TNR,VEGFA,EZR,RAP1GAP2,PLXNA3,TTL,SEMA3D,DRAXIN
15_Member	GO Biological Processes	GO:0061387	regulation of extent of cell growth	-2.52365	-1.0727	12/104	348,1002,1630,4133,5058,5802,7143,7422,55558,150465,223117,374946	APOE,CDH4,DCC,MAP2,PAK1,PTPRS,TNR,VEGFA,PLXNA3,TTL,SEMA3D,DRAXIN
15_Member	GO Biological Processes	GO:0030516	regulation of axon extension	-2.47759	-1.04296	11/92	348,1002,4133,5058,5802,7143,7422,55558,150465,223117,374946	APOE,CDH4,MAP2,PAK1,PTPRS,TNR,VEGFA,PLXNA3,TTL,SEMA3D,DRAXIN
15_Member	GO Biological Processes	GO:0030308	negative regulation of cell growth	-2.27085	-0.885538	17/185	596,1026,1032,1630,2273,2697,4133,5058,5795,5802,6586,7143,23251,55558,84687,223117,374946	BCL2,CDKN1A,CDKN2D,DCC,FHL1,GJA1,MAP2,PAK1,PTPRJ,PTPRS,SLIT3,TNR,MINAR1,PLXNA3,PPP1R9B,SEMA3D,DRAXIN
16_Summary	GO Biological Processes	GO:0030029	actin filament-based process	-7.20432	-4.60947	71/789	287,395,408,477,596,781,817,830,1266,1730,1809,1824,1901,2013,2037,2039,2697,2824,2909,4082,4604,4628,4763,4853,4983,5058,5156,5239,5872,5898,5911,6711,7010,7134,7138,7184,7430,10152,10178,10611,10979,11013,11170,11214,22808,22843,23022,23043,23189,23704,26053,27032,29766,30011,50488,54434,54566,54874,54959,55435,55740,55742,55800,57221,79109,81553,84687,116986,221692,286527,359845,152,183,348,36…	ANK2,ARHGAP6,ARRB1,ATP1A2,BCL2,CACNA2D1,CAMK2D,CAPZA2,CNN3,DIAPH2,DPYSL3,DSC2,S1PR1,EMP2,EPB41L2,DMTN,GJA1,GPM6B,ARHGAP35,MARCKS,MYBPC1,MYH10,NF1,NOTCH2,OPHN1,PAK1,PDGFRA,PGM5,RAB13,RALA,RAP2A,SPTBN1,TEK,TNNC1,TNNT1,HSP90B1,EZR,ABI2,TENM1,PDLIM5,FERMT2,TMSB15A,FAM107A,AKAP13,MRAS,PPM1E,PALLD,TNIK,KANK1,KCNE4,AUTS2,ATP2C1,TMOD3,SH3KBP1,MINK1,SSH1,EPB41L4B,FNBP1L,ODAM,AP1AR,ENAH,PARVA,SCN3B,ARFGEF3…
16_Member	GO Biological Processes	GO:0030029	actin filament-based process	-7.20432	-4.60947	71/789	287,395,408,477,596,781,817,830,1266,1730,1809,1824,1901,2013,2037,2039,2697,2824,2909,4082,4604,4628,4763,4853,4983,5058,5156,5239,5872,5898,5911,6711,7010,7134,7138,7184,7430,10152,10178,10611,10979,11013,11170,11214,22808,22843,23022,23043,23189,23704,26053,27032,29766,30011,50488,54434,54566,54874,54959,55435,55740,55742,55800,57221,79109,81553,84687,116986,221692,286527,359845	ANK2,ARHGAP6,ARRB1,ATP1A2,BCL2,CACNA2D1,CAMK2D,CAPZA2,CNN3,DIAPH2,DPYSL3,DSC2,S1PR1,EMP2,EPB41L2,DMTN,GJA1,GPM6B,ARHGAP35,MARCKS,MYBPC1,MYH10,NF1,NOTCH2,OPHN1,PAK1,PDGFRA,PGM5,RAB13,RALA,RAP2A,SPTBN1,TEK,TNNC1,TNNT1,HSP90B1,EZR,ABI2,TENM1,PDLIM5,FERMT2,TMSB15A,FAM107A,AKAP13,MRAS,PPM1E,PALLD,TNIK,KANK1,KCNE4,AUTS2,ATP2C1,TMOD3,SH3KBP1,MINK1,SSH1,EPB41L4B,FNBP1L,ODAM,AP1AR,ENAH,PARVA,SCN3B,ARFGEF3…
16_Member	GO Biological Processes	GO:0030036	actin cytoskeleton organization	-5.57909	-3.35691	60/696	395,408,596,830,1266,1730,1809,1901,2013,2037,2039,2824,2909,4082,4628,4763,4853,4983,5058,5156,5239,5872,5898,5911,6711,7010,7138,7184,7430,10152,10178,10611,10979,11013,11170,11214,22808,22843,23022,23043,23189,26053,27032,29766,30011,50488,54434,54566,54959,55435,55740,55742,57221,79109,81553,84687,116986,221692,286527,359845	ARHGAP6,ARRB1,BCL2,CAPZA2,CNN3,DIAPH2,DPYSL3,S1PR1,EMP2,EPB41L2,DMTN,GPM6B,ARHGAP35,MARCKS,MYH10,NF1,NOTCH2,OPHN1,PAK1,PDGFRA,PGM5,RAB13,RALA,RAP2A,SPTBN1,TEK,TNNT1,HSP90B1,EZR,ABI2,TENM1,PDLIM5,FERMT2,TMSB15A,FAM107A,AKAP13,MRAS,PPM1E,PALLD,TNIK,KANK1,AUTS2,ATP2C1,TMOD3,SH3KBP1,MINK1,SSH1,EPB41L4B,ODAM,AP1AR,ENAH,PARVA,ARFGEF3,MAPKAP1,CYRIA,PPP1R9B,AGAP2,PHACTR1,TMSB15B,RFLNB
16_Member	GO Biological Processes	GO:0090066	regulation of anatomical structure size	-3.35362	-1.67686	40/495	152,183,348,361,477,830,1002,1630,1910,2039,2697,2909,3326,3350,4133,4878,5021,5058,5076,5728,5802,6711,7143,7422,7430,10152,10178,11013,23108,23189,29766,54434,55435,55558,59342,81553,150465,223117,286527,374946	ADRA2C,AGT,APOE,AQP4,ATP1A2,CAPZA2,CDH4,DCC,EDNRB,DMTN,GJA1,ARHGAP35,HSP90AB1,HTR1A,MAP2,NPPA,OXTR,PAK1,PAX2,PTEN,PTPRS,SPTBN1,TNR,VEGFA,EZR,ABI2,TENM1,TMSB15A,RAP1GAP2,KANK1,TMOD3,SSH1,AP1AR,PLXNA3,SCPEP1,CYRIA,TTL,SEMA3D,TMSB15B,DRAXIN
16_Member	GO Biological Processes	GO:0097435	supramolecular fiber organization	-3.34626	-1.67083	53/713	348,395,408,596,830,1453,1730,1809,1901,2013,2039,2909,3326,4082,4133,4204,4763,5058,5156,5203,5239,6711,7138,7184,7411,7430,8737,10152,10178,10471,10979,11013,11170,11214,22843,22924,23189,29766,30011,51199,54434,55435,55740,57562,81553,83473,84687,157922,221692,286527,359845,401720,100506658	APOE,ARHGAP6,ARRB1,BCL2,CAPZA2,CSNK1D,DIAPH2,DPYSL3,S1PR1,EMP2,DMTN,ARHGAP35,HSP90AB1,MARCKS,MAP2,MECP2,NF1,PAK1,PDGFRA,PFDN4,PGM5,SPTBN1,TNNT1,HSP90B1,VBP1,EZR,RIPK1,ABI2,TENM1,PFDN6,FERMT2,TMSB15A,FAM107A,AKAP13,PPM1E,MAPRE3,KANK1,TMOD3,SH3KBP1,NIN,SSH1,AP1AR,ENAH,CEP126,CYRIA,KATNAL2,PPP1R9B,CAMSAP1,PHACTR1,TMSB15B,RFLNB,FIGNL2,OCLN
16_Member	GO Biological Processes	GO:0032535	regulation of cellular component size	-2.68728	-1.18871	30/370	348,361,830,1002,1630,2039,2909,3326,4133,5058,5728,5802,6711,7143,7422,7430,10152,10178,11013,23108,23189,29766,54434,55435,55558,81553,150465,223117,286527,374946	APOE,AQP4,CAPZA2,CDH4,DCC,DMTN,ARHGAP35,HSP90AB1,MAP2,PAK1,PTEN,PTPRS,SPTBN1,TNR,VEGFA,EZR,ABI2,TENM1,TMSB15A,RAP1GAP2,KANK1,TMOD3,SSH1,AP1AR,PLXNA3,CYRIA,TTL,SEMA3D,TMSB15B,DRAXIN
16_Member	GO Biological Processes	GO:0051493	regulation of cytoskeleton organization	-2.58818	-1.11577	40/544	395,830,1901,2039,2824,2909,4133,4204,4853,5058,5156,5594,5747,6711,7010,7430,8850,10152,10178,10979,11013,11170,11214,22843,22924,23189,29766,51199,54434,54959,55435,55558,56890,60312,81553,85459,157922,286527,348235,100506658	ARHGAP6,CAPZA2,S1PR1,DMTN,GPM6B,ARHGAP35,MAP2,MECP2,NOTCH2,PAK1,PDGFRA,MAPK1,PTK2,SPTBN1,TEK,EZR,KAT2B,ABI2,TENM1,FERMT2,TMSB15A,FAM107A,AKAP13,PPM1E,MAPRE3,KANK1,TMOD3,NIN,SSH1,ODAM,AP1AR,PLXNA3,MDM1,AFAP1,CYRIA,CEP295,CAMSAP1,TMSB15B,SKA2,OCLN
16_Member	GO Biological Processes	GO:0032970	regulation of actin filament-based process	-2.5413	-1.08494	31/395	287,395,477,817,830,1824,1901,2039,2824,2909,4853,5058,5156,6711,7010,7134,7430,10152,10178,10979,11013,11170,11214,22843,23189,29766,54434,54959,55435,81553,286527	ANK2,ARHGAP6,ATP1A2,CAMK2D,CAPZA2,DSC2,S1PR1,DMTN,GPM6B,ARHGAP35,NOTCH2,PAK1,PDGFRA,SPTBN1,TEK,TNNC1,EZR,ABI2,TENM1,FERMT2,TMSB15A,FAM107A,AKAP13,PPM1E,KANK1,TMOD3,SSH1,ODAM,AP1AR,CYRIA,TMSB15B
16_Member	GO Biological Processes	GO:1902904	negative regulation of supramolecular fiber organization	-2.49783	-1.05643	16/161	348,395,830,1901,2039,4133,5203,6711,7411,10471,11013,23189,29766,54434,157922,286527	APOE,ARHGAP6,CAPZA2,S1PR1,DMTN,MAP2,PFDN4,SPTBN1,VBP1,PFDN6,TMSB15A,KANK1,TMOD3,SSH1,CAMSAP1,TMSB15B
16_Member	GO Biological Processes	GO:1902903	regulation of supramolecular fiber organization	-2.42314	-0.998738	29/369	348,395,830,1901,2039,2909,4133,4204,5058,5203,6711,7411,10152,10178,10471,10979,11013,11214,22843,22924,23189,29766,51199,54434,55435,81553,157922,286527,100506658	APOE,ARHGAP6,CAPZA2,S1PR1,DMTN,ARHGAP35,MAP2,MECP2,PAK1,PFDN4,SPTBN1,VBP1,ABI2,TENM1,PFDN6,FERMT2,TMSB15A,AKAP13,PPM1E,MAPRE3,KANK1,TMOD3,NIN,SSH1,AP1AR,CYRIA,CAMSAP1,TMSB15B,OCLN
16_Member	GO Biological Processes	GO:0007015	actin filament organization	-2.17382	-0.8201	32/436	395,408,596,830,1730,1809,1901,2013,2039,2909,4082,5058,6711,7184,7430,10152,10178,10979,11013,11170,22843,23189,29766,30011,54434,55435,55740,81553,84687,221692,286527,359845	ARHGAP6,ARRB1,BCL2,CAPZA2,DIAPH2,DPYSL3,S1PR1,EMP2,DMTN,ARHGAP35,MARCKS,PAK1,SPTBN1,HSP90B1,EZR,ABI2,TENM1,FERMT2,TMSB15A,FAM107A,PPM1E,KANK1,TMOD3,SH3KBP1,SSH1,AP1AR,ENAH,CYRIA,PPP1R9B,PHACTR1,TMSB15B,RFLNB
16_Member	GO Biological Processes	GO:0043254	regulation of protein complex assembly	-2.12007	-0.77862	35/492	348,830,2039,2965,2967,4133,4204,5058,5830,6711,7099,7422,8450,9969,10152,10178,10979,11013,22924,23189,29766,51100,51199,51339,51657,54434,55364,55435,55719,56681,81553,157922,260434,286527,100506658	APOE,CAPZA2,DMTN,GTF2H1,GTF2H3,MAP2,MECP2,PAK1,PEX5,SPTBN1,TLR4,VEGFA,CUL4B,MED13,ABI2,TENM1,FERMT2,TMSB15A,MAPRE3,KANK1,TMOD3,SH3GLB1,NIN,DACT1,STYXL1,SSH1,IMPACT,AP1AR,SLF2,SAR1A,CYRIA,CAMSAP1,PYDC1,TMSB15B,OCLN
16_Member	GO Biological Processes	GO:0032271	regulation of protein polymerization	-2.08309	-0.752122	19/225	830,2039,4133,4204,5058,6711,10152,10178,11013,22924,23189,29766,51199,54434,55435,81553,157922,286527,100506658	CAPZA2,DMTN,MAP2,MECP2,PAK1,SPTBN1,ABI2,TENM1,TMSB15A,MAPRE3,KANK1,TMOD3,NIN,SSH1,AP1AR,CYRIA,CAMSAP1,TMSB15B,OCLN
16_Member	GO Biological Processes	GO:0031333	negative regulation of protein complex assembly	-2.06959	-0.746114	14/148	830,2039,4133,5830,6711,11013,23189,29766,51339,51657,54434,55364,260434,286527	CAPZA2,DMTN,MAP2,PEX5,SPTBN1,TMSB15A,KANK1,TMOD3,DACT1,STYXL1,SSH1,IMPACT,PYDC1,TMSB15B
16_Member	GO Biological Processes	GO:0030837	negative regulation of actin filament polymerization	-2.05227	-0.732782	8/64	830,2039,6711,11013,23189,29766,54434,286527	CAPZA2,DMTN,SPTBN1,TMSB15A,KANK1,TMOD3,SSH1,TMSB15B
16_Member	GO Biological Processes	GO:0032272	negative regulation of protein polymerization	-2.02177	-0.718628	9/78	830,2039,4133,6711,11013,23189,29766,54434,286527	CAPZA2,DMTN,MAP2,SPTBN1,TMSB15A,KANK1,TMOD3,SSH1,TMSB15B
17_Summary	GO Biological Processes	GO:0072503	cellular divalent inorganic cation homeostasis	-7.10471	-4.53114	50/481	287,348,477,493,596,781,794,817,1813,1901,1910,2534,2697,2890,2898,2904,2905,2915,3358,3709,3954,4489,4495,4496,4501,4502,4544,5021,5156,5579,5733,6373,7009,7184,7223,7225,9256,10463,10518,23413,27032,55532,56704,57338,79085,79734,83636,84239,89869,100133941,9365,482,9843,79400,183,331,114781,5594,6005,7879,8671,9497,1447,2775,4878,5957,24145,51669,55334,151651,201266	ANK2,APOE,ATP1A2,ATP2B4,BCL2,CACNA2D1,CALB2,CAMK2D,DRD2,S1PR1,EDNRB,FYN,GJA1,GRIA1,GRIK2,GRIN2B,GRIN2C,GRM5,HTR2C,ITPR2,LETM1,MT1A,MT1G,MT1H,MT1X,MT2A,MTNR1B,OXTR,PDGFRA,PRKCB,PTGER3,CXCL11,TMBIM6,HSP90B1,TRPC4,TRPC6,TSPOAP1,SLC30A9,CIB2,NCS1,ATP2C1,SLC30A10,JPH1,JPH3,SLC25A23,KCTD17,C19orf12,ATP13A4,PLCZ1,CD24,KL,ATP1B2,HEPH,NOX5,AGT,XIAP,BTBD9,MAPK1,RHAG,RAB7A,SLC4A4,SLC4A7,CSN2,GNAO1,NPPA,RCVR…
17_Member	GO Biological Processes	GO:0072503	cellular divalent inorganic cation homeostasis	-7.10471	-4.53114	50/481	287,348,477,493,596,781,794,817,1813,1901,1910,2534,2697,2890,2898,2904,2905,2915,3358,3709,3954,4489,4495,4496,4501,4502,4544,5021,5156,5579,5733,6373,7009,7184,7223,7225,9256,10463,10518,23413,27032,55532,56704,57338,79085,79734,83636,84239,89869,100133941	ANK2,APOE,ATP1A2,ATP2B4,BCL2,CACNA2D1,CALB2,CAMK2D,DRD2,S1PR1,EDNRB,FYN,GJA1,GRIA1,GRIK2,GRIN2B,GRIN2C,GRM5,HTR2C,ITPR2,LETM1,MT1A,MT1G,MT1H,MT1X,MT2A,MTNR1B,OXTR,PDGFRA,PRKCB,PTGER3,CXCL11,TMBIM6,HSP90B1,TRPC4,TRPC6,TSPOAP1,SLC30A9,CIB2,NCS1,ATP2C1,SLC30A10,JPH1,JPH3,SLC25A23,KCTD17,C19orf12,ATP13A4,PLCZ1,CD24
17_Member	GO Biological Processes	GO:0072507	divalent inorganic cation homeostasis	-6.9732	-4.41363	51/500	287,348,477,493,596,781,794,817,1813,1901,1910,2534,2697,2890,2898,2904,2905,2915,3358,3709,3954,4489,4495,4496,4501,4502,4544,5021,5156,5579,5733,6373,7009,7184,7223,7225,9256,9365,10463,10518,23413,27032,55532,56704,57338,79085,79734,83636,84239,89869,100133941	ANK2,APOE,ATP1A2,ATP2B4,BCL2,CACNA2D1,CALB2,CAMK2D,DRD2,S1PR1,EDNRB,FYN,GJA1,GRIA1,GRIK2,GRIN2B,GRIN2C,GRM5,HTR2C,ITPR2,LETM1,MT1A,MT1G,MT1H,MT1X,MT2A,MTNR1B,OXTR,PDGFRA,PRKCB,PTGER3,CXCL11,TMBIM6,HSP90B1,TRPC4,TRPC6,TSPOAP1,KL,SLC30A9,CIB2,NCS1,ATP2C1,SLC30A10,JPH1,JPH3,SLC25A23,KCTD17,C19orf12,ATP13A4,PLCZ1,CD24
17_Member	GO Biological Processes	GO:0006875	cellular metal ion homeostasis	-5.88882	-3.57805	53/573	287,348,477,482,493,596,781,794,817,1813,1901,1910,2534,2697,2890,2898,2904,2905,2915,3358,3709,3954,4489,4495,4496,4501,4502,4544,5021,5156,5579,5733,6373,7009,7184,7223,7225,9256,9843,10463,10518,23413,27032,55532,56704,57338,79085,79400,79734,83636,84239,89869,100133941	ANK2,APOE,ATP1A2,ATP1B2,ATP2B4,BCL2,CACNA2D1,CALB2,CAMK2D,DRD2,S1PR1,EDNRB,FYN,GJA1,GRIA1,GRIK2,GRIN2B,GRIN2C,GRM5,HTR2C,ITPR2,LETM1,MT1A,MT1G,MT1H,MT1X,MT2A,MTNR1B,OXTR,PDGFRA,PRKCB,PTGER3,CXCL11,TMBIM6,HSP90B1,TRPC4,TRPC6,TSPOAP1,HEPH,SLC30A9,CIB2,NCS1,ATP2C1,SLC30A10,JPH1,JPH3,SLC25A23,NOX5,KCTD17,C19orf12,ATP13A4,PLCZ1,CD24
17_Member	GO Biological Processes	GO:0055065	metal ion homeostasis	-5.65977	-3.40467	57/645	183,287,331,348,477,482,493,596,781,794,817,1813,1901,1910,2534,2697,2890,2898,2904,2905,2915,3358,3709,3954,4489,4495,4496,4501,4502,4544,5021,5156,5579,5733,6373,7009,7184,7223,7225,9256,9365,9843,10463,10518,23413,27032,55532,56704,57338,79085,79400,79734,83636,84239,89869,114781,100133941	AGT,ANK2,XIAP,APOE,ATP1A2,ATP1B2,ATP2B4,BCL2,CACNA2D1,CALB2,CAMK2D,DRD2,S1PR1,EDNRB,FYN,GJA1,GRIA1,GRIK2,GRIN2B,GRIN2C,GRM5,HTR2C,ITPR2,LETM1,MT1A,MT1G,MT1H,MT1X,MT2A,MTNR1B,OXTR,PDGFRA,PRKCB,PTGER3,CXCL11,TMBIM6,HSP90B1,TRPC4,TRPC6,TSPOAP1,KL,HEPH,SLC30A9,CIB2,NCS1,ATP2C1,SLC30A10,JPH1,JPH3,SLC25A23,NOX5,KCTD17,C19orf12,ATP13A4,PLCZ1,BTBD9,CD24
17_Member	GO Biological Processes	GO:0006873	cellular ion homeostasis	-5.5497	-3.33693	58/666	287,348,477,482,493,596,781,794,817,1813,1901,1910,2534,2697,2890,2898,2904,2905,2915,3358,3709,3954,4489,4495,4496,4501,4502,4544,5021,5156,5579,5594,5733,6005,6373,7009,7184,7223,7225,7879,8671,9256,9497,9843,10463,10518,23413,27032,55532,56704,57338,79085,79400,79734,83636,84239,89869,100133941	ANK2,APOE,ATP1A2,ATP1B2,ATP2B4,BCL2,CACNA2D1,CALB2,CAMK2D,DRD2,S1PR1,EDNRB,FYN,GJA1,GRIA1,GRIK2,GRIN2B,GRIN2C,GRM5,HTR2C,ITPR2,LETM1,MT1A,MT1G,MT1H,MT1X,MT2A,MTNR1B,OXTR,PDGFRA,PRKCB,MAPK1,PTGER3,RHAG,CXCL11,TMBIM6,HSP90B1,TRPC4,TRPC6,RAB7A,SLC4A4,TSPOAP1,SLC4A7,HEPH,SLC30A9,CIB2,NCS1,ATP2C1,SLC30A10,JPH1,JPH3,SLC25A23,NOX5,KCTD17,C19orf12,ATP13A4,PLCZ1,CD24
17_Member	GO Biological Processes	GO:0030003	cellular cation homeostasis	-5.49552	-3.29883	57/653	287,348,477,482,493,596,781,794,817,1813,1901,1910,2534,2697,2890,2898,2904,2905,2915,3358,3709,3954,4489,4495,4496,4501,4502,4544,5021,5156,5579,5594,5733,6373,7009,7184,7223,7225,7879,8671,9256,9497,9843,10463,10518,23413,27032,55532,56704,57338,79085,79400,79734,83636,84239,89869,100133941	ANK2,APOE,ATP1A2,ATP1B2,ATP2B4,BCL2,CACNA2D1,CALB2,CAMK2D,DRD2,S1PR1,EDNRB,FYN,GJA1,GRIA1,GRIK2,GRIN2B,GRIN2C,GRM5,HTR2C,ITPR2,LETM1,MT1A,MT1G,MT1H,MT1X,MT2A,MTNR1B,OXTR,PDGFRA,PRKCB,MAPK1,PTGER3,CXCL11,TMBIM6,HSP90B1,TRPC4,TRPC6,RAB7A,SLC4A4,TSPOAP1,SLC4A7,HEPH,SLC30A9,CIB2,NCS1,ATP2C1,SLC30A10,JPH1,JPH3,SLC25A23,NOX5,KCTD17,C19orf12,ATP13A4,PLCZ1,CD24
17_Member	GO Biological Processes	GO:0055074	calcium ion homeostasis	-5.49042	-3.29883	44/455	287,348,477,493,596,781,794,817,1813,1901,1910,2534,2697,2890,2898,2904,2905,2915,3358,3709,3954,4544,5021,5156,5579,5733,6373,7009,7184,7223,7225,9256,9365,10518,23413,27032,56704,57338,79085,79734,83636,84239,89869,100133941	ANK2,APOE,ATP1A2,ATP2B4,BCL2,CACNA2D1,CALB2,CAMK2D,DRD2,S1PR1,EDNRB,FYN,GJA1,GRIA1,GRIK2,GRIN2B,GRIN2C,GRM5,HTR2C,ITPR2,LETM1,MTNR1B,OXTR,PDGFRA,PRKCB,PTGER3,CXCL11,TMBIM6,HSP90B1,TRPC4,TRPC6,TSPOAP1,KL,CIB2,NCS1,ATP2C1,JPH1,JPH3,SLC25A23,KCTD17,C19orf12,ATP13A4,PLCZ1,CD24
17_Member	GO Biological Processes	GO:0006874	cellular calcium ion homeostasis	-5.42174	-3.24468	43/443	287,348,477,493,596,781,794,817,1813,1901,1910,2534,2697,2890,2898,2904,2905,2915,3358,3709,3954,4544,5021,5156,5579,5733,6373,7009,7184,7223,7225,9256,10518,23413,27032,56704,57338,79085,79734,83636,84239,89869,100133941	ANK2,APOE,ATP1A2,ATP2B4,BCL2,CACNA2D1,CALB2,CAMK2D,DRD2,S1PR1,EDNRB,FYN,GJA1,GRIA1,GRIK2,GRIN2B,GRIN2C,GRM5,HTR2C,ITPR2,LETM1,MTNR1B,OXTR,PDGFRA,PRKCB,PTGER3,CXCL11,TMBIM6,HSP90B1,TRPC4,TRPC6,TSPOAP1,CIB2,NCS1,ATP2C1,JPH1,JPH3,SLC25A23,KCTD17,C19orf12,ATP13A4,PLCZ1,CD24
17_Member	GO Biological Processes	GO:0055080	cation homeostasis	-5.27048	-3.14168	61/728	183,287,331,348,477,482,493,596,781,794,817,1813,1901,1910,2534,2697,2890,2898,2904,2905,2915,3358,3709,3954,4489,4495,4496,4501,4502,4544,5021,5156,5579,5594,5733,6373,7009,7184,7223,7225,7879,8671,9256,9365,9497,9843,10463,10518,23413,27032,55532,56704,57338,79085,79400,79734,83636,84239,89869,114781,100133941	AGT,ANK2,XIAP,APOE,ATP1A2,ATP1B2,ATP2B4,BCL2,CACNA2D1,CALB2,CAMK2D,DRD2,S1PR1,EDNRB,FYN,GJA1,GRIA1,GRIK2,GRIN2B,GRIN2C,GRM5,HTR2C,ITPR2,LETM1,MT1A,MT1G,MT1H,MT1X,MT2A,MTNR1B,OXTR,PDGFRA,PRKCB,MAPK1,PTGER3,CXCL11,TMBIM6,HSP90B1,TRPC4,TRPC6,RAB7A,SLC4A4,TSPOAP1,KL,SLC4A7,HEPH,SLC30A9,CIB2,NCS1,ATP2C1,SLC30A10,JPH1,JPH3,SLC25A23,NOX5,KCTD17,C19orf12,ATP13A4,PLCZ1,BTBD9,CD24
17_Member	GO Biological Processes	GO:0098771	inorganic ion homeostasis	-5.08704	-2.97117	61/738	183,287,331,348,477,482,493,596,781,794,817,1813,1901,1910,2534,2697,2890,2898,2904,2905,2915,3358,3709,3954,4489,4495,4496,4501,4502,4544,5021,5156,5579,5594,5733,6373,7009,7184,7223,7225,7879,8671,9256,9365,9497,9843,10463,10518,23413,27032,55532,56704,57338,79085,79400,79734,83636,84239,89869,114781,100133941	AGT,ANK2,XIAP,APOE,ATP1A2,ATP1B2,ATP2B4,BCL2,CACNA2D1,CALB2,CAMK2D,DRD2,S1PR1,EDNRB,FYN,GJA1,GRIA1,GRIK2,GRIN2B,GRIN2C,GRM5,HTR2C,ITPR2,LETM1,MT1A,MT1G,MT1H,MT1X,MT2A,MTNR1B,OXTR,PDGFRA,PRKCB,MAPK1,PTGER3,CXCL11,TMBIM6,HSP90B1,TRPC4,TRPC6,RAB7A,SLC4A4,TSPOAP1,KL,SLC4A7,HEPH,SLC30A9,CIB2,NCS1,ATP2C1,SLC30A10,JPH1,JPH3,SLC25A23,NOX5,KCTD17,C19orf12,ATP13A4,PLCZ1,BTBD9,CD24
17_Member	GO Biological Processes	GO:0051480	regulation of cytosolic calcium ion concentration	-4.55692	-2.57459	34/345	287,477,493,596,781,794,817,1813,1901,1910,2534,2697,2890,2904,2905,2915,3358,3709,3954,4544,5021,5156,5733,6373,7009,7223,7225,9256,10518,23413,56704,57338,89869,100133941	ANK2,ATP1A2,ATP2B4,BCL2,CACNA2D1,CALB2,CAMK2D,DRD2,S1PR1,EDNRB,FYN,GJA1,GRIA1,GRIN2B,GRIN2C,GRM5,HTR2C,ITPR2,LETM1,MTNR1B,OXTR,PDGFRA,PTGER3,CXCL11,TMBIM6,TRPC4,TRPC6,TSPOAP1,CIB2,NCS1,JPH1,JPH3,PLCZ1,CD24
17_Member	GO Biological Processes	GO:0060402	calcium ion transport into cytosol	-3.18315	-1.55098	17/152	287,477,493,596,781,817,1813,2534,2904,2905,3358,3709,3954,6373,7009,56704,57338	ANK2,ATP1A2,ATP2B4,BCL2,CACNA2D1,CAMK2D,DRD2,FYN,GRIN2B,GRIN2C,HTR2C,ITPR2,LETM1,CXCL11,TMBIM6,JPH1,JPH3
17_Member	GO Biological Processes	GO:0060401	cytosolic calcium ion transport	-3.1133	-1.49317	18/168	287,477,493,596,781,817,1813,2534,2904,2905,3358,3709,3954,6373,7009,56704,57338,79085	ANK2,ATP1A2,ATP2B4,BCL2,CACNA2D1,CAMK2D,DRD2,FYN,GRIN2B,GRIN2C,HTR2C,ITPR2,LETM1,CXCL11,TMBIM6,JPH1,JPH3,SLC25A23
17_Member	GO Biological Processes	GO:0007204	positive regulation of cytosolic calcium ion concentration	-2.91653	-1.35001	27/310	287,477,493,596,781,817,1813,1901,1910,2534,2697,2904,2905,3358,3709,3954,5021,5156,5733,6373,7009,7225,10518,56704,57338,89869,100133941	ANK2,ATP1A2,ATP2B4,BCL2,CACNA2D1,CAMK2D,DRD2,S1PR1,EDNRB,FYN,GJA1,GRIN2B,GRIN2C,HTR2C,ITPR2,LETM1,OXTR,PDGFRA,PTGER3,CXCL11,TMBIM6,TRPC6,CIB2,JPH1,JPH3,PLCZ1,CD24
17_Member	GO Biological Processes	GO:0097553	calcium ion transmembrane import into cytosol	-2.88061	-1.32242	15/134	287,477,493,781,817,1813,2534,2904,2905,3358,3709,3954,6373,56704,57338	ANK2,ATP1A2,ATP2B4,CACNA2D1,CAMK2D,DRD2,FYN,GRIN2B,GRIN2C,HTR2C,ITPR2,LETM1,CXCL11,JPH1,JPH3
17_Member	GO Biological Processes	GO:0070838	divalent metal ion transport	-2.86786	-1.31309	36/458	287,477,493,596,781,817,1447,1813,2534,2697,2775,2904,2905,3358,3709,3954,4878,5579,5957,6373,7009,7223,7225,10463,23413,24145,27032,51669,55334,55532,56704,57338,79085,89869,151651,201266	ANK2,ATP1A2,ATP2B4,BCL2,CACNA2D1,CAMK2D,CSN2,DRD2,FYN,GJA1,GNAO1,GRIN2B,GRIN2C,HTR2C,ITPR2,LETM1,NPPA,PRKCB,RCVRN,CXCL11,TMBIM6,TRPC4,TRPC6,SLC30A9,NCS1,PANX1,ATP2C1,SARAF,SLC39A9,SLC30A10,JPH1,JPH3,SLC25A23,PLCZ1,EFHB,SLC39A11
17_Member	GO Biological Processes	GO:0072511	divalent inorganic cation transport	-2.80289	-1.26485	36/462	287,477,493,596,781,817,1447,1813,2534,2697,2775,2904,2905,3358,3709,3954,4878,5579,5957,6373,7009,7223,7225,10463,23413,24145,27032,51669,55334,55532,56704,57338,79085,89869,151651,201266	ANK2,ATP1A2,ATP2B4,BCL2,CACNA2D1,CAMK2D,CSN2,DRD2,FYN,GJA1,GNAO1,GRIN2B,GRIN2C,HTR2C,ITPR2,LETM1,NPPA,PRKCB,RCVRN,CXCL11,TMBIM6,TRPC4,TRPC6,SLC30A9,NCS1,PANX1,ATP2C1,SARAF,SLC39A9,SLC30A10,JPH1,JPH3,SLC25A23,PLCZ1,EFHB,SLC39A11
17_Member	GO Biological Processes	GO:0006816	calcium ion transport	-2.58388	-1.11259	32/409	287,477,493,596,781,817,1447,1813,2534,2697,2775,2904,2905,3358,3709,3954,4878,5579,5957,6373,7009,7223,7225,23413,24145,27032,51669,56704,57338,79085,89869,151651	ANK2,ATP1A2,ATP2B4,BCL2,CACNA2D1,CAMK2D,CSN2,DRD2,FYN,GJA1,GNAO1,GRIN2B,GRIN2C,HTR2C,ITPR2,LETM1,NPPA,PRKCB,RCVRN,CXCL11,TMBIM6,TRPC4,TRPC6,NCS1,PANX1,ATP2C1,SARAF,JPH1,JPH3,SLC25A23,PLCZ1,EFHB
17_Member	GO Biological Processes	GO:0051208	sequestering of calcium ion	-2.05542	-0.734339	12/119	287,477,817,1813,3358,3709,3954,6373,7184,56704,57338,79085	ANK2,ATP1A2,CAMK2D,DRD2,HTR2C,ITPR2,LETM1,CXCL11,HSP90B1,JPH1,JPH3,SLC25A23
18_Summary	GO Biological Processes	GO:0072657	protein localization to membrane	-7.06658	-4.50006	62/658	163,287,348,493,596,1121,1363,1740,2013,2039,2239,2262,2534,2898,2905,4038,4218,5058,5064,5534,5830,5872,5911,6159,6168,6170,6229,6711,7159,7430,7529,7879,8417,8674,8831,9312,9379,9495,10966,10979,11231,22979,23043,23184,26521,51100,54434,54550,55022,55670,55800,56288,57154,57554,79683,80333,84687,90410,254359,376267,388336,100133941,2037	AP2B1,ANK2,APOE,ATP2B4,BCL2,CHM,CPE,DLG2,EMP2,DMTN,GPC4,GPC5,FYN,GRIK2,GRIN2C,LRP4,RAB8A,PAK1,PALM,PPP3R1,PEX5,RAB13,RAP2A,RPL29,RPL37A,RPL39,RPS24,SPTBN1,TP53BP2,EZR,YWHAB,RAB7A,STX7,VAMP4,SYNGAP1,KCNB2,NRXN2,AKAP5,RAB40B,FERMT2,SEC63,EFR3B,TNIK,MESD,TIMM8B,SH3GLB1,SSH1,NECAB2,PID1,PEX26,SCN3B,PARD3,SMURF1,LRRC7,ZDHHC14,KCNIP4,PPP1R9B,IFT20,ZDHHC24,RAB15,SHISA6,CD24,EPB41L2
18_Member	GO Biological Processes	GO:0072657	protein localization to membrane	-7.06658	-4.50006	62/658	163,287,348,493,596,1121,1363,1740,2013,2039,2239,2262,2534,2898,2905,4038,4218,5058,5064,5534,5830,5872,5911,6159,6168,6170,6229,6711,7159,7430,7529,7879,8417,8674,8831,9312,9379,9495,10966,10979,11231,22979,23043,23184,26521,51100,54434,54550,55022,55670,55800,56288,57154,57554,79683,80333,84687,90410,254359,376267,388336,100133941	AP2B1,ANK2,APOE,ATP2B4,BCL2,CHM,CPE,DLG2,EMP2,DMTN,GPC4,GPC5,FYN,GRIK2,GRIN2C,LRP4,RAB8A,PAK1,PALM,PPP3R1,PEX5,RAB13,RAP2A,RPL29,RPL37A,RPL39,RPS24,SPTBN1,TP53BP2,EZR,YWHAB,RAB7A,STX7,VAMP4,SYNGAP1,KCNB2,NRXN2,AKAP5,RAB40B,FERMT2,SEC63,EFR3B,TNIK,MESD,TIMM8B,SH3GLB1,SSH1,NECAB2,PID1,PEX26,SCN3B,PARD3,SMURF1,LRRC7,ZDHHC14,KCNIP4,PPP1R9B,IFT20,ZDHHC24,RAB15,SHISA6,CD24
18_Member	GO Biological Processes	GO:1990778	protein localization to cell periphery	-2.66012	-1.16632	27/323	287,493,2013,2037,2239,2905,4218,5064,5872,5911,6711,7430,7879,8417,8674,9312,9495,10966,22979,23043,55022,55800,57154,80333,84687,90410,376267	ANK2,ATP2B4,EMP2,EPB41L2,GPC4,GRIN2C,RAB8A,PALM,RAB13,RAP2A,SPTBN1,EZR,RAB7A,STX7,VAMP4,KCNB2,AKAP5,RAB40B,EFR3B,TNIK,PID1,SCN3B,SMURF1,KCNIP4,PPP1R9B,IFT20,RAB15
18_Member	GO Biological Processes	GO:0072659	protein localization to plasma membrane	-2.62823	-1.14727	24/277	287,493,2013,4218,5064,5872,5911,6711,7430,7879,8417,8674,9312,9495,10966,22979,23043,55022,55800,57154,80333,84687,90410,376267	ANK2,ATP2B4,EMP2,RAB8A,PALM,RAB13,RAP2A,SPTBN1,EZR,RAB7A,STX7,VAMP4,KCNB2,AKAP5,RAB40B,EFR3B,TNIK,PID1,SCN3B,SMURF1,KCNIP4,PPP1R9B,IFT20,RAB15
19_Summary	GO Biological Processes	GO:0007423	sensory organ development	-6.83782	-4.30854	53/534	430,493,596,658,1813,2202,2558,2637,2737,2909,4094,4544,4763,4810,4853,4915,5013,5076,5089,5156,5316,5594,5954,5961,6101,6657,6664,7068,7101,7422,7849,8854,9132,9497,9750,10152,10220,10461,10804,23418,27152,56603,56853,56890,57030,65217,79888,84059,90410,161742,170692,220202,388585,5457	ASCL2,ATP2B4,BCL2,BMPR1B,DRD2,EFEMP1,GABRA5,GBX2,GLI3,ARHGAP35,MAF,MTNR1B,NF1,NHS,NOTCH2,NTRK2,OTX1,PAX2,PBX2,PDGFRA,PKNOX1,MAPK1,RCN1,PRPH2,RP1,SOX2,SOX11,THRB,NR2E1,VEGFA,PAX8,ALDH1A2,KCNQ4,SLC4A7,RIPOR2,ABI2,GDF11,MERTK,GJB6,CRB1,INTU,CYP26B1,CELF4,MDM1,SLC17A7,PCDH15,LPCAT1,ADGRV1,IFT20,SPRED1,ADAMTS18,ATOH7,HES5,POU4F1
19_Member	GO Biological Processes	GO:0007423	sensory organ development	-6.83782	-4.30854	53/534	430,493,596,658,1813,2202,2558,2637,2737,2909,4094,4544,4763,4810,4853,4915,5013,5076,5089,5156,5316,5594,5954,5961,6101,6657,6664,7068,7101,7422,7849,8854,9132,9497,9750,10152,10220,10461,10804,23418,27152,56603,56853,56890,57030,65217,79888,84059,90410,161742,170692,220202,388585	ASCL2,ATP2B4,BCL2,BMPR1B,DRD2,EFEMP1,GABRA5,GBX2,GLI3,ARHGAP35,MAF,MTNR1B,NF1,NHS,NOTCH2,NTRK2,OTX1,PAX2,PBX2,PDGFRA,PKNOX1,MAPK1,RCN1,PRPH2,RP1,SOX2,SOX11,THRB,NR2E1,VEGFA,PAX8,ALDH1A2,KCNQ4,SLC4A7,RIPOR2,ABI2,GDF11,MERTK,GJB6,CRB1,INTU,CYP26B1,CELF4,MDM1,SLC17A7,PCDH15,LPCAT1,ADGRV1,IFT20,SPRED1,ADAMTS18,ATOH7,HES5
19_Member	GO Biological Processes	GO:0048880	sensory system development	-5.86401	-3.55818	39/369	493,596,658,1813,2202,2737,2909,4094,4544,4763,4810,4853,4915,5076,5089,5156,5316,5457,5954,5961,6101,6657,6664,7068,7101,7422,8854,10152,10220,10461,23418,56853,56890,57030,79888,161742,170692,220202,388585	ATP2B4,BCL2,BMPR1B,DRD2,EFEMP1,GLI3,ARHGAP35,MAF,MTNR1B,NF1,NHS,NOTCH2,NTRK2,PAX2,PBX2,PDGFRA,PKNOX1,POU4F1,RCN1,PRPH2,RP1,SOX2,SOX11,THRB,NR2E1,VEGFA,ALDH1A2,ABI2,GDF11,MERTK,CRB1,CELF4,MDM1,SLC17A7,LPCAT1,SPRED1,ADAMTS18,ATOH7,HES5
19_Member	GO Biological Processes	GO:0001654	eye development	-5.74633	-3.47733	38/359	493,596,658,1813,2202,2737,2909,4094,4544,4763,4810,4853,4915,5076,5089,5156,5316,5954,5961,6101,6657,6664,7068,7101,7422,8854,10152,10220,10461,23418,56853,56890,57030,79888,161742,170692,220202,388585	ATP2B4,BCL2,BMPR1B,DRD2,EFEMP1,GLI3,ARHGAP35,MAF,MTNR1B,NF1,NHS,NOTCH2,NTRK2,PAX2,PBX2,PDGFRA,PKNOX1,RCN1,PRPH2,RP1,SOX2,SOX11,THRB,NR2E1,VEGFA,ALDH1A2,ABI2,GDF11,MERTK,CRB1,CELF4,MDM1,SLC17A7,LPCAT1,SPRED1,ADAMTS18,ATOH7,HES5
19_Member	GO Biological Processes	GO:0150063	visual system development	-5.63051	-3.38888	38/363	493,596,658,1813,2202,2737,2909,4094,4544,4763,4810,4853,4915,5076,5089,5156,5316,5954,5961,6101,6657,6664,7068,7101,7422,8854,10152,10220,10461,23418,56853,56890,57030,79888,161742,170692,220202,388585	ATP2B4,BCL2,BMPR1B,DRD2,EFEMP1,GLI3,ARHGAP35,MAF,MTNR1B,NF1,NHS,NOTCH2,NTRK2,PAX2,PBX2,PDGFRA,PKNOX1,RCN1,PRPH2,RP1,SOX2,SOX11,THRB,NR2E1,VEGFA,ALDH1A2,ABI2,GDF11,MERTK,CRB1,CELF4,MDM1,SLC17A7,LPCAT1,SPRED1,ADAMTS18,ATOH7,HES5
19_Member	GO Biological Processes	GO:0043010	camera-type eye development	-5.30932	-3.17313	33/304	493,658,1813,2202,2737,2909,4094,4544,4763,4810,4853,5076,5156,5316,5954,5961,6101,6664,7068,7101,7422,8854,10152,10220,10461,23418,56853,56890,57030,79888,161742,220202,388585	ATP2B4,BMPR1B,DRD2,EFEMP1,GLI3,ARHGAP35,MAF,MTNR1B,NF1,NHS,NOTCH2,PAX2,PDGFRA,PKNOX1,RCN1,PRPH2,RP1,SOX11,THRB,NR2E1,VEGFA,ALDH1A2,ABI2,GDF11,MERTK,CRB1,CELF4,MDM1,SLC17A7,LPCAT1,SPRED1,ATOH7,HES5
19_Member	GO Biological Processes	GO:0090596	sensory organ morphogenesis	-3.01937	-1.42688	23/244	596,2202,2637,2737,4763,4853,4915,5013,5076,5594,6101,6664,7068,7422,7849,9132,9750,10152,10220,10804,23418,27152,56603	BCL2,EFEMP1,GBX2,GLI3,NF1,NOTCH2,NTRK2,OTX1,PAX2,MAPK1,RP1,SOX11,THRB,VEGFA,PAX8,KCNQ4,RIPOR2,ABI2,GDF11,GJB6,CRB1,INTU,CYP26B1
19_Member	GO Biological Processes	GO:0060041	retina development in camera-type eye	-2.72106	-1.21341	15/139	493,658,5076,5156,5961,6101,7068,7101,10461,23418,56853,56890,57030,79888,220202	ATP2B4,BMPR1B,PAX2,PDGFRA,PRPH2,RP1,THRB,NR2E1,MERTK,CRB1,CELF4,MDM1,SLC17A7,LPCAT1,ATOH7
19_Member	GO Biological Processes	GO:0048592	eye morphogenesis	-2.19734	-0.829657	14/143	596,2202,2737,4763,4853,4915,5076,6101,6664,7068,7422,10152,10220,23418	BCL2,EFEMP1,GLI3,NF1,NOTCH2,NTRK2,PAX2,RP1,SOX11,THRB,VEGFA,ABI2,GDF11,CRB1
20_Summary	KEGG Pathway	ko04723	Retrograde endocannabinoid signaling	-6.80832	-4.28826	19/101	2555,2556,2558,2560,2562,2565,2775,2776,2790,2890,2915,3709,5330,5579,5582,5594,22999,55970,57030,163,1390,4915,5296,5728,2742,5348,6507,6509,8001,23155,55129,57348,63982,116369,2904,2905,253512,408,5138,5139,27115,8671,9497,223,4731,3350,1813,5021,64854,320,341,348,477,765,1374,2170,2182,2697,6005,6506,7223,8660,8737,9256,10257,53919,54677,79085,81579,84725,144195,151473,387775,2774	GABRA2,GABRA3,GABRA5,GABRB1,GABRB3,GABRG1,GNAO1,GNAQ,GNG10,GRIA1,GRM5,ITPR2,PLCB2,PRKCB,PRKCG,MAPK1,RIMS1,GNG12,SLC17A7,AP2B1,CREM,NTRK2,PIK3R2,PTEN,GLRA2,FXYD1,SLC1A3,SLC1A4,GLRA3,CLCC1,ANO10,TTYH1,ANO3,SLC26A8,GRIN2B,GRIN2C,SLC25A30,ARRB1,PDE2A,PDE3A,PDE7B,SLC4A4,SLC4A7,ALDH9A1,NDUFV3,HTR1A,DRD2,OXTR,USP46,APBA1,APOC1,APOE,ATP1A2,CA6,CPT1A,FABP3,ACSL4,GJA1,RHAG,SLC1A2,TRPC4,IRS2,RIPK1,TSPOAP1,A…
20_Member	KEGG Pathway	ko04723	Retrograde endocannabinoid signaling	-6.80832	-4.28826	19/101	2555,2556,2558,2560,2562,2565,2775,2776,2790,2890,2915,3709,5330,5579,5582,5594,22999,55970,57030	GABRA2,GABRA3,GABRA5,GABRB1,GABRB3,GABRG1,GNAO1,GNAQ,GNG10,GRIA1,GRM5,ITPR2,PLCB2,PRKCB,PRKCG,MAPK1,RIMS1,GNG12,SLC17A7
20_Member	WikiPathways	WP4829	mBDNF and proBDNF regulation of GABA neurotransmission	-6.14309	-3.78418	11/38	163,1390,2555,2556,2558,2560,2562,2565,4915,5296,5728	AP2B1,CREM,GABRA2,GABRA3,GABRA5,GABRB1,GABRB3,GABRG1,NTRK2,PIK3R2,PTEN
20_Member	GO Biological Processes	GO:1902476	chloride transmembrane transport	-5.06064	-2.957	16/97	2555,2556,2558,2560,2562,2565,2742,5348,6507,6509,8001,23155,55129,57348,63982,116369	GABRA2,GABRA3,GABRA5,GABRB1,GABRB3,GABRG1,GLRA2,FXYD1,SLC1A3,SLC1A4,GLRA3,CLCC1,ANO10,TTYH1,ANO3,SLC26A8
20_Member	KEGG Pathway	ko05033	Nicotine addiction	-5.00556	-2.91148	10/40	2555,2556,2558,2560,2562,2565,2890,2904,2905,57030	GABRA2,GABRA3,GABRA5,GABRB1,GABRB3,GABRG1,GRIA1,GRIN2B,GRIN2C,SLC17A7
20_Member	GO Biological Processes	GO:0006821	chloride transport	-4.94686	-2.8598	17/110	2555,2556,2558,2560,2562,2565,2742,2915,5348,6507,6509,8001,23155,55129,57348,63982,116369	GABRA2,GABRA3,GABRA5,GABRB1,GABRB3,GABRG1,GLRA2,GRM5,FXYD1,SLC1A3,SLC1A4,GLRA3,CLCC1,ANO10,TTYH1,ANO3,SLC26A8
20_Member	GO Biological Processes	GO:0098661	inorganic anion transmembrane transport	-4.91368	-2.83353	18/122	2555,2556,2558,2560,2562,2565,2742,2915,5348,6507,6509,8001,23155,55129,57348,63982,116369,253512	GABRA2,GABRA3,GABRA5,GABRB1,GABRB3,GABRG1,GLRA2,GRM5,FXYD1,SLC1A3,SLC1A4,GLRA3,CLCC1,ANO10,TTYH1,ANO3,SLC26A8,SLC25A30
20_Member	KEGG Pathway	hsa05033	Nicotine addiction	-4.80247	-2.76579	10/42	2555,2556,2558,2560,2562,2565,2890,2904,2905,57030	GABRA2,GABRA3,GABRA5,GABRB1,GABRB3,GABRG1,GRIA1,GRIN2B,GRIN2C,SLC17A7
20_Member	KEGG Pathway	ko05032	Morphine addiction	-4.77935	-2.74882	15/91	408,2555,2556,2558,2560,2562,2565,2775,2790,5138,5139,5579,5582,27115,55970	ARRB1,GABRA2,GABRA3,GABRA5,GABRB1,GABRB3,GABRG1,GNAO1,GNG10,PDE2A,PDE3A,PRKCB,PRKCG,PDE7B,GNG12
20_Member	KEGG Pathway	hsa05032	Morphine addiction	-4.72073	-2.70028	15/92	408,2555,2556,2558,2560,2562,2565,2775,2790,5138,5139,5579,5582,27115,55970	ARRB1,GABRA2,GABRA3,GABRA5,GABRB1,GABRB3,GABRG1,GNAO1,GNG10,PDE2A,PDE3A,PRKCB,PRKCG,PDE7B,GNG12
20_Member	GO Biological Processes	GO:0015698	inorganic anion transport	-4.26614	-2.35903	21/174	2555,2556,2558,2560,2562,2565,2742,2915,5348,6507,6509,8001,8671,9497,23155,55129,57030,57348,63982,116369,253512	GABRA2,GABRA3,GABRA5,GABRB1,GABRB3,GABRG1,GLRA2,GRM5,FXYD1,SLC1A3,SLC1A4,GLRA3,SLC4A4,SLC4A7,CLCC1,ANO10,SLC17A7,TTYH1,ANO3,SLC26A8,SLC25A30
20_Member	WikiPathways	WP4159	GABA receptor Signaling	-4.21989	-2.32188	8/31	163,223,2555,2556,2558,2560,2562,2565	AP2B1,ALDH9A1,GABRA2,GABRA3,GABRA5,GABRB1,GABRB3,GABRG1
20_Member	KEGG Pathway	hsa04723	Retrograde endocannabinoid signaling	-4.04577	-2.18379	20/167	2555,2556,2558,2560,2562,2565,2775,2776,2790,2890,2915,3709,4731,5330,5579,5582,5594,22999,55970,57030	GABRA2,GABRA3,GABRA5,GABRB1,GABRB3,GABRG1,GNAO1,GNAQ,GNG10,GRIA1,GRM5,ITPR2,NDUFV3,PLCB2,PRKCB,PRKCG,MAPK1,RIMS1,GNG12,SLC17A7
20_Member	GO Biological Processes	GO:0007214	gamma-aminobutyric acid signaling pathway	-3.76986	-1.98729	7/27	2555,2556,2558,2560,2562,2565,3350	GABRA2,GABRA3,GABRA5,GABRB1,GABRB3,GABRG1,HTR1A
20_Member	GO Biological Processes	GO:0051932	synaptic transmission, GABAergic	-2.96628	-1.38625	8/46	1813,2555,2556,2558,2565,5021,5728,64854	DRD2,GABRA2,GABRA3,GABRA5,GABRG1,OXTR,PTEN,USP46
20_Member	GO Biological Processes	GO:0006820	anion transport	-2.94358	-1.37001	48/656	320,341,348,477,765,1374,1813,2170,2182,2555,2556,2558,2560,2562,2565,2697,2742,2915,4915,5348,6005,6506,6507,6509,7223,8001,8660,8671,8737,9256,9497,10257,22999,23155,53919,54677,55129,57030,57348,63982,79085,81579,84725,116369,144195,151473,253512,387775	APBA1,APOC1,APOE,ATP1A2,CA6,CPT1A,DRD2,FABP3,ACSL4,GABRA2,GABRA3,GABRA5,GABRB1,GABRB3,GABRG1,GJA1,GLRA2,GRM5,NTRK2,FXYD1,RHAG,SLC1A2,SLC1A3,SLC1A4,TRPC4,GLRA3,IRS2,SLC4A4,RIPK1,TSPOAP1,SLC4A7,ABCC4,RIMS1,CLCC1,SLCO1C1,CROT,ANO10,SLC17A7,TTYH1,ANO3,SLC25A23,PLA2G12A,PLEKHA8,SLC26A8,SLC2A14,SLC16A14,SLC25A30,SLC22A10
20_Member	GO Biological Processes	GO:0098656	anion transmembrane transport	-2.81268	-1.27068	28/331	477,1374,2555,2556,2558,2560,2562,2565,2697,2742,2915,5348,6506,6507,6509,8001,8660,8671,8737,9497,10257,23155,55129,57030,57348,63982,116369,253512	ATP1A2,CPT1A,GABRA2,GABRA3,GABRA5,GABRB1,GABRB3,GABRG1,GJA1,GLRA2,GRM5,FXYD1,SLC1A2,SLC1A3,SLC1A4,GLRA3,IRS2,SLC4A4,RIPK1,SLC4A7,ABCC4,CLCC1,ANO10,SLC17A7,TTYH1,ANO3,SLC26A8,SLC25A30
20_Member	KEGG Pathway	ko04727	GABAergic synapse	-2.6306	-1.14907	11/88	2555,2556,2558,2560,2562,2565,2775,2790,5579,5582,55970	GABRA2,GABRA3,GABRA5,GABRB1,GABRB3,GABRG1,GNAO1,GNG10,PRKCB,PRKCG,GNG12
20_Member	KEGG Pathway	hsa04727	GABAergic synapse	-2.51487	-1.06605	11/91	2555,2556,2558,2560,2562,2565,2775,2790,5579,5582,55970	GABRA2,GABRA3,GABRA5,GABRB1,GABRB3,GABRG1,GNAO1,GNG10,PRKCB,PRKCG,GNG12
20_Member	Reactome Gene Sets	R-HSA-977443	GABA receptor activation	-2.22055	-0.847518	8/60	2555,2556,2558,2560,2562,2774,2790,55970	GABRA2,GABRA3,GABRA5,GABRB1,GABRB3,GNAL,GNG10,GNG12

## Sheet: NC  VS. MCI_S (PLSR)
GroupID	Category	Term	Description	LogP	Log(q-value)	InTerm_InList	Genes	Symbols
1_Summary	GO Biological Processes	GO:0007268	chemical synaptic transmission	-23.6686	-19.7435	159/684	29,40,116,154,348,409,575,590,627,784,793,794,808,869,952,1006,1009,1020,1131,1136,1140,1142,1268,1325,1393,1488,1607,1728,1740,1816,1906,2534,2555,2556,2558,2560,2564,2565,2742,2771,2895,2897,2898,2899,2900,2905,2911,2913,2916,2917,2982,3062,3265,3269,3350,3358,3363,3553,3777,3785,3786,4355,4852,4885,4889,4915,4923,4983,4986,4988,5021,5026,5173,5368,5413,5582,5594,5649,5764,5786,5865,5908,6507,6…	ABR,ASIC2,ADCYAP1,ADRB2,APOE,ARRB2,ADGRB1,BCHE,BDNF,CACNB3,CALB1,CALB2,CALM3,CBLN1,CD38,CDH8,CDH11,CDK5,CHRM3,CHRNA3,CHRNB1,CHRNB3,CNR1,CORT,CRHBP,CTBP2,DGKB,NQO1,DLG2,DRD5,EDN1,FYN,GABRA2,GABRA3,GABRA5,GABRB1,GABRE,GABRG1,GLRA2,GNAI2,GRID2,GRIK1,GRIK2,GRIK3,GRIK4,GRIN2C,GRM1,GRM3,GRM6,GRM7,GUCY1A1,HCRTR2,HRAS,HRH1,HTR1A,HTR2C,HTR7,IL1B,KCNK3,KCNQ2,KCNQ3,MPP2,NPY,NPTX2,NPY5R,NTRK2,NTSR1,OPHN1,OPR…
1_Member	GO Biological Processes	GO:0007268	chemical synaptic transmission	-23.6686	-19.7435	159/684	29,40,116,154,348,409,575,590,627,784,793,794,808,869,952,1006,1009,1020,1131,1136,1140,1142,1268,1325,1393,1488,1607,1728,1740,1816,1906,2534,2555,2556,2558,2560,2564,2565,2742,2771,2895,2897,2898,2899,2900,2905,2911,2913,2916,2917,2982,3062,3265,3269,3350,3358,3363,3553,3777,3785,3786,4355,4852,4885,4889,4915,4923,4983,4986,4988,5021,5026,5173,5368,5413,5582,5594,5649,5764,5786,5865,5908,6507,6…	ABR,ASIC2,ADCYAP1,ADRB2,APOE,ARRB2,ADGRB1,BCHE,BDNF,CACNB3,CALB1,CALB2,CALM3,CBLN1,CD38,CDH8,CDH11,CDK5,CHRM3,CHRNA3,CHRNB1,CHRNB3,CNR1,CORT,CRHBP,CTBP2,DGKB,NQO1,DLG2,DRD5,EDN1,FYN,GABRA2,GABRA3,GABRA5,GABRB1,GABRE,GABRG1,GLRA2,GNAI2,GRID2,GRIK1,GRIK2,GRIK3,GRIK4,GRIN2C,GRM1,GRM3,GRM6,GRM7,GUCY1A1,HCRTR2,HRAS,HRH1,HTR1A,HTR2C,HTR7,IL1B,KCNK3,KCNQ2,KCNQ3,MPP2,NPY,NPTX2,NPY5R,NTRK2,NTSR1,OPHN1,OPR…
1_Member	GO Biological Processes	GO:0098916	anterograde trans-synaptic signaling	-23.6686	-19.7435	159/684	29,40,116,154,348,409,575,590,627,784,793,794,808,869,952,1006,1009,1020,1131,1136,1140,1142,1268,1325,1393,1488,1607,1728,1740,1816,1906,2534,2555,2556,2558,2560,2564,2565,2742,2771,2895,2897,2898,2899,2900,2905,2911,2913,2916,2917,2982,3062,3265,3269,3350,3358,3363,3553,3777,3785,3786,4355,4852,4885,4889,4915,4923,4983,4986,4988,5021,5026,5173,5368,5413,5582,5594,5649,5764,5786,5865,5908,6507,6…	ABR,ASIC2,ADCYAP1,ADRB2,APOE,ARRB2,ADGRB1,BCHE,BDNF,CACNB3,CALB1,CALB2,CALM3,CBLN1,CD38,CDH8,CDH11,CDK5,CHRM3,CHRNA3,CHRNB1,CHRNB3,CNR1,CORT,CRHBP,CTBP2,DGKB,NQO1,DLG2,DRD5,EDN1,FYN,GABRA2,GABRA3,GABRA5,GABRB1,GABRE,GABRG1,GLRA2,GNAI2,GRID2,GRIK1,GRIK2,GRIK3,GRIK4,GRIN2C,GRM1,GRM3,GRM6,GRM7,GUCY1A1,HCRTR2,HRAS,HRH1,HTR1A,HTR2C,HTR7,IL1B,KCNK3,KCNQ2,KCNQ3,MPP2,NPY,NPTX2,NPY5R,NTRK2,NTSR1,OPHN1,OPR…
1_Member	GO Biological Processes	GO:0099537	trans-synaptic signaling	-23.6253	-19.7435	160/691	29,40,116,154,348,409,575,590,627,784,793,794,808,869,952,1006,1009,1020,1131,1136,1140,1142,1268,1325,1393,1488,1607,1728,1740,1816,1906,2171,2534,2555,2556,2558,2560,2564,2565,2742,2771,2895,2897,2898,2899,2900,2905,2911,2913,2916,2917,2982,3062,3265,3269,3350,3358,3363,3553,3777,3785,3786,4355,4852,4885,4889,4915,4923,4983,4986,4988,5021,5026,5173,5368,5413,5582,5594,5649,5764,5786,5865,5908,6…	ABR,ASIC2,ADCYAP1,ADRB2,APOE,ARRB2,ADGRB1,BCHE,BDNF,CACNB3,CALB1,CALB2,CALM3,CBLN1,CD38,CDH8,CDH11,CDK5,CHRM3,CHRNA3,CHRNB1,CHRNB3,CNR1,CORT,CRHBP,CTBP2,DGKB,NQO1,DLG2,DRD5,EDN1,FABP5,FYN,GABRA2,GABRA3,GABRA5,GABRB1,GABRE,GABRG1,GLRA2,GNAI2,GRID2,GRIK1,GRIK2,GRIK3,GRIK4,GRIN2C,GRM1,GRM3,GRM6,GRM7,GUCY1A1,HCRTR2,HRAS,HRH1,HTR1A,HTR2C,HTR7,IL1B,KCNK3,KCNQ2,KCNQ3,MPP2,NPY,NPTX2,NPY5R,NTRK2,NTSR1,OPH…
1_Member	GO Biological Processes	GO:0099536	synaptic signaling	-23.4441	-19.6872	161/700	29,40,116,154,348,409,575,590,627,784,793,794,808,869,952,1006,1009,1020,1131,1136,1140,1142,1268,1325,1393,1488,1607,1728,1740,1816,1838,1906,2171,2534,2555,2556,2558,2560,2564,2565,2742,2771,2895,2897,2898,2899,2900,2905,2911,2913,2916,2917,2982,3062,3265,3269,3350,3358,3363,3553,3777,3785,3786,4355,4852,4885,4889,4915,4923,4983,4986,4988,5021,5026,5173,5368,5413,5582,5594,5649,5764,5786,5865,5…	ABR,ASIC2,ADCYAP1,ADRB2,APOE,ARRB2,ADGRB1,BCHE,BDNF,CACNB3,CALB1,CALB2,CALM3,CBLN1,CD38,CDH8,CDH11,CDK5,CHRM3,CHRNA3,CHRNB1,CHRNB3,CNR1,CORT,CRHBP,CTBP2,DGKB,NQO1,DLG2,DRD5,DTNB,EDN1,FABP5,FYN,GABRA2,GABRA3,GABRA5,GABRB1,GABRE,GABRG1,GLRA2,GNAI2,GRID2,GRIK1,GRIK2,GRIK3,GRIK4,GRIN2C,GRM1,GRM3,GRM6,GRM7,GUCY1A1,HCRTR2,HRAS,HRH1,HTR1A,HTR2C,HTR7,IL1B,KCNK3,KCNQ2,KCNQ3,MPP2,NPY,NPTX2,NPY5R,NTRK2,NTSR…
1_Member	GO Biological Processes	GO:0099177	regulation of trans-synaptic signaling	-14.0825	-11.0246	96/419	29,116,154,348,409,575,590,627,784,793,794,808,869,952,1009,1020,1136,1268,1607,1816,1906,2171,2534,2771,2895,2897,2898,2899,2900,2905,2911,2913,2916,2917,2982,3265,3269,3553,4355,4885,4889,4915,4923,4983,5021,5413,5582,5594,5649,5764,5786,5865,5908,6543,6622,6623,6804,6844,6860,7101,7476,7533,8938,9148,10368,10590,10636,10718,10858,11170,11188,22930,23467,23542,23657,27253,27345,50944,54413,5685…	ABR,ADCYAP1,ADRB2,APOE,ARRB2,ADGRB1,BCHE,BDNF,CACNB3,CALB1,CALB2,CALM3,CBLN1,CD38,CDH11,CDK5,CHRNA3,CNR1,DGKB,DRD5,EDN1,FABP5,FYN,GNAI2,GRID2,GRIK1,GRIK2,GRIK3,GRIK4,GRIN2C,GRM1,GRM3,GRM6,GRM7,GUCY1A1,HRAS,HRH1,IL1B,MPP2,NPTX2,NPY5R,NTRK2,NTSR1,OPHN1,OXTR,SEPTIN5,PRKCG,MAPK1,RELN,PTN,PTPRA,RAB3B,RAP1B,SLC8A2,SNCA,SNCG,STX1A,VAMP2,SYT4,NR2E1,WNT7A,YWHAH,BAIAP3,NEURL1,CACNG3,SCGN,RGS14,NRG3,CYP46A1…
1_Member	GO Biological Processes	GO:0050804	modulation of chemical synaptic transmission	-13.7139	-10.6772	95/418	29,116,154,348,409,575,590,627,784,793,794,808,869,952,1009,1020,1136,1268,1607,1816,1906,2534,2771,2895,2897,2898,2899,2900,2905,2911,2913,2916,2917,2982,3265,3269,3553,4355,4885,4889,4915,4923,4983,5021,5413,5582,5594,5649,5764,5786,5865,5908,6543,6622,6623,6804,6844,6860,7101,7476,7533,8938,9148,10368,10590,10636,10718,10858,11170,11188,22930,23467,23542,23657,27253,27345,50944,54413,56853,574…	ABR,ADCYAP1,ADRB2,APOE,ARRB2,ADGRB1,BCHE,BDNF,CACNB3,CALB1,CALB2,CALM3,CBLN1,CD38,CDH11,CDK5,CHRNA3,CNR1,DGKB,DRD5,EDN1,FYN,GNAI2,GRID2,GRIK1,GRIK2,GRIK3,GRIK4,GRIN2C,GRM1,GRM3,GRM6,GRM7,GUCY1A1,HRAS,HRH1,IL1B,MPP2,NPTX2,NPY5R,NTRK2,NTSR1,OPHN1,OXTR,SEPTIN5,PRKCG,MAPK1,RELN,PTN,PTPRA,RAB3B,RAP1B,SLC8A2,SNCA,SNCG,STX1A,VAMP2,SYT4,NR2E1,WNT7A,YWHAH,BAIAP3,NEURL1,CACNG3,SCGN,RGS14,NRG3,CYP46A1,FAM10…
1_Member	GO Biological Processes	GO:0050806	positive regulation of synaptic transmission	-5.66447	-3.81207	36/158	116,154,348,409,784,793,794,1020,1268,2898,2905,4355,4915,4923,5021,5594,5649,5764,5865,6543,6804,6844,7101,7476,8938,10368,10590,10636,10858,11170,22930,50944,54413,57555,80863,84062	ADCYAP1,ADRB2,APOE,ARRB2,CACNB3,CALB1,CALB2,CDK5,CNR1,GRIK2,GRIN2C,MPP2,NTRK2,NTSR1,OXTR,MAPK1,RELN,PTN,RAB3B,SLC8A2,STX1A,VAMP2,NR2E1,WNT7A,BAIAP3,CACNG3,SCGN,RGS14,CYP46A1,FAM107A,RAB3GAP1,SHANK1,NLGN3,NLGN2,PRRT1,DTNBP1
1_Member	GO Biological Processes	GO:0048167	regulation of synaptic plasticity	-3.57901	-2.14747	33/174	348,575,793,794,869,952,1020,1816,2895,2898,2905,3265,3269,4355,4915,5594,5649,5764,6543,6844,7101,7533,9148,10590,10636,10858,11170,22930,50944,57537,79772,80863,84502	APOE,ADGRB1,CALB1,CALB2,CBLN1,CD38,CDK5,DRD5,GRID2,GRIK2,GRIN2C,HRAS,HRH1,MPP2,NTRK2,MAPK1,RELN,PTN,SLC8A2,VAMP2,NR2E1,YWHAH,NEURL1,SCGN,RGS14,CYP46A1,FAM107A,RAB3GAP1,SHANK1,SORCS2,MCTP1,PRRT1,JPH4
1_Member	GO Biological Processes	GO:0060291	long-term synaptic potentiation	-2.88228	-1.62271	18/83	348,793,794,2905,4355,4915,5594,5649,5764,6543,6844,7101,10590,10636,10858,11170,50944,80863	APOE,CALB1,CALB2,GRIN2C,MPP2,NTRK2,MAPK1,RELN,PTN,SLC8A2,VAMP2,NR2E1,SCGN,RGS14,CYP46A1,FAM107A,SHANK1,PRRT1
2_Summary	GO Biological Processes	GO:0043269	regulation of ion transport	-17.0154	-13.3555	145/696	21,40,116,154,187,348,409,482,486,493,778,779,784,799,808,817,885,967,1020,1131,1136,1230,1268,1393,1408,1622,1740,1756,1906,2040,2170,2280,2281,2316,2534,2564,2669,2697,2771,2775,2824,2916,2917,2946,3208,3350,3383,3553,3739,3754,3755,3758,3768,3781,3784,3785,3786,4067,4129,4878,4889,4923,4988,5026,5031,5155,5348,5465,5580,5649,5774,5777,5865,5987,6326,6328,6332,6335,6588,6622,6623,6640,6786,6844…	ABCA3,ASIC2,ADCYAP1,ADRB2,APLNR,APOE,ARRB2,ATP1B2,FXYD2,ATP2B4,CACNA1F,CACNA1S,CACNB3,CALCR,CALM3,CAMK2D,CCK,CD63,CDK5,CHRM3,CHRNA3,CCR1,CNR1,CRHBP,CRY2,DBI,DLG2,DMD,EDN1,STOM,FABP3,FKBP1A,FKBP1B,FLNA,FYN,GABRE,GEM,GJA1,GNAI2,GNAO1,GPM6B,GRM6,GRM7,GSTM2,HPCA,HTR1A,ICAM1,IL1B,KCNA4,KCNF1,KCNG1,KCNJ1,KCNJ12,KCNN2,KCNQ1,KCNQ2,KCNQ3,LYN,MAOB,NPPA,NPY5R,NTSR1,OPRM1,P2RX5,P2RY6,PDGFB,FXYD1,PPARA,PRKCD,…
2_Member	GO Biological Processes	GO:0043269	regulation of ion transport	-17.0154	-13.3555	145/696	21,40,116,154,187,348,409,482,486,493,778,779,784,799,808,817,885,967,1020,1131,1136,1230,1268,1393,1408,1622,1740,1756,1906,2040,2170,2280,2281,2316,2534,2564,2669,2697,2771,2775,2824,2916,2917,2946,3208,3350,3383,3553,3739,3754,3755,3758,3768,3781,3784,3785,3786,4067,4129,4878,4889,4923,4988,5026,5031,5155,5348,5465,5580,5649,5774,5777,5865,5987,6326,6328,6332,6335,6588,6622,6623,6640,6786,6844…	ABCA3,ASIC2,ADCYAP1,ADRB2,APLNR,APOE,ARRB2,ATP1B2,FXYD2,ATP2B4,CACNA1F,CACNA1S,CACNB3,CALCR,CALM3,CAMK2D,CCK,CD63,CDK5,CHRM3,CHRNA3,CCR1,CNR1,CRHBP,CRY2,DBI,DLG2,DMD,EDN1,STOM,FABP3,FKBP1A,FKBP1B,FLNA,FYN,GABRE,GEM,GJA1,GNAI2,GNAO1,GPM6B,GRM6,GRM7,GSTM2,HPCA,HTR1A,ICAM1,IL1B,KCNA4,KCNF1,KCNG1,KCNJ1,KCNJ12,KCNN2,KCNQ1,KCNQ2,KCNQ3,LYN,MAOB,NPPA,NPY5R,NTSR1,OPRM1,P2RX5,P2RY6,PDGFB,FXYD1,PPARA,PRKCD,…
2_Member	GO Biological Processes	GO:0034762	regulation of transmembrane transport	-10.3854	-7.7589	108/565	40,154,187,482,486,493,778,779,784,799,808,817,967,1020,1131,1393,1740,1756,1906,2040,2171,2280,2281,2316,2534,2669,2697,2887,2946,3099,3208,3479,3553,3739,3754,3755,3758,3768,3781,3784,3785,3786,4067,4878,4923,4947,4988,5031,5167,5348,5649,5774,5777,6326,6328,6332,6335,6588,6622,6640,6786,6844,7114,7531,7533,8013,8682,8787,8811,9312,9948,9992,10345,10368,10776,11151,11280,23542,23704,25999,50944…	ASIC2,ADRB2,APLNR,ATP1B2,FXYD2,ATP2B4,CACNA1F,CACNA1S,CACNB3,CALCR,CALM3,CAMK2D,CD63,CDK5,CHRM3,CRHBP,DLG2,DMD,EDN1,STOM,FABP5,FKBP1A,FKBP1B,FLNA,FYN,GEM,GJA1,GRB10,GSTM2,HK2,HPCA,IGF1,IL1B,KCNA4,KCNF1,KCNG1,KCNJ1,KCNJ12,KCNN2,KCNQ1,KCNQ2,KCNQ3,LYN,NPPA,NTSR1,OAZ2,OPRM1,P2RY6,ENPP1,FXYD1,RELN,PTPN3,PTPN6,SCN2A,SCN3A,SCN7A,SCN9A,SLN,SNCA,SNTA1,STIM1,VAMP2,TMSB4X,YWHAE,YWHAH,NR4A3,PEA15,RGS9,GALR2,…
2_Member	GO Biological Processes	GO:1904062	regulation of cation transmembrane transport	-7.58364	-5.39205	68/340	154,187,482,486,493,784,799,808,817,967,1020,1393,1740,1756,2040,2280,2281,2316,2534,2669,2946,3208,3755,3781,3784,4067,4878,4923,4988,5031,5348,5649,5774,5777,6588,6622,6640,6786,6844,7114,7531,7533,8787,8811,9992,10345,10368,11151,23542,23704,50944,53826,54413,55800,57190,57393,57555,57628,79026,80863,84277,84334,84502,130497,146395,149111,254263,644139	ADRB2,APLNR,ATP1B2,FXYD2,ATP2B4,CACNB3,CALCR,CALM3,CAMK2D,CD63,CDK5,CRHBP,DLG2,DMD,STOM,FKBP1A,FKBP1B,FLNA,FYN,GEM,GSTM2,HPCA,KCNG1,KCNN2,KCNQ1,LYN,NPPA,NTSR1,OPRM1,P2RY6,FXYD1,RELN,PTPN3,PTPN6,SLN,SNCA,SNTA1,STIM1,VAMP2,TMSB4X,YWHAE,YWHAH,RGS9,GALR2,KCNE2,TRDN,CACNG3,CORO1A,MAPK8IP2,KCNE4,SHANK1,FXYD6,NLGN3,SCN3B,SELENON,CLTRN,NLGN2,DPP10,AHNAK,PRRT1,DNAJC30,COA8,JPH4,OSR1,GSG1L,CNIH3,CNIH2,PIRT
2_Member	GO Biological Processes	GO:0034765	regulation of ion transmembrane transport	-7.42126	-5.24987	87/479	40,154,187,482,486,493,778,779,784,799,808,817,967,1020,1131,1393,1740,1756,2040,2280,2281,2316,2534,2669,2946,3208,3739,3754,3755,3758,3768,3781,3784,3785,3786,4067,4878,4923,4988,5031,5348,5649,5774,5777,6326,6328,6332,6335,6588,6622,6640,6786,6844,7114,7531,7533,8787,8811,9312,9948,9992,10345,10368,11151,11280,23542,23704,50944,53826,54413,55800,56659,57190,57393,57555,57628,79026,80863,84277,…	ASIC2,ADRB2,APLNR,ATP1B2,FXYD2,ATP2B4,CACNA1F,CACNA1S,CACNB3,CALCR,CALM3,CAMK2D,CD63,CDK5,CHRM3,CRHBP,DLG2,DMD,STOM,FKBP1A,FKBP1B,FLNA,FYN,GEM,GSTM2,HPCA,KCNA4,KCNF1,KCNG1,KCNJ1,KCNJ12,KCNN2,KCNQ1,KCNQ2,KCNQ3,LYN,NPPA,NTSR1,OPRM1,P2RY6,FXYD1,RELN,PTPN3,PTPN6,SCN2A,SCN3A,SCN7A,SCN9A,SLN,SNCA,SNTA1,STIM1,VAMP2,TMSB4X,YWHAE,YWHAH,RGS9,GALR2,KCNB2,WDR1,KCNE2,TRDN,CACNG3,CORO1A,SCN11A,MAPK8IP2,KCNE4,S…
2_Member	GO Biological Processes	GO:0022898	regulation of transmembrane transporter activity	-7.03025	-4.93616	56/268	154,482,486,784,808,817,1020,1131,1393,1740,1756,2040,2280,2281,2669,2697,2946,3208,3755,4878,4923,4988,5031,5348,5649,5774,6588,6622,6786,6844,7114,7531,7533,8787,8811,9992,10345,10368,23542,23704,50944,53826,54413,55800,57190,57393,57555,79026,80863,84334,84502,130497,146395,149111,254263,644139	ADRB2,ATP1B2,FXYD2,CACNB3,CALM3,CAMK2D,CDK5,CHRM3,CRHBP,DLG2,DMD,STOM,FKBP1A,FKBP1B,GEM,GJA1,GSTM2,HPCA,KCNG1,NPPA,NTSR1,OPRM1,P2RY6,FXYD1,RELN,PTPN3,SLN,SNCA,STIM1,VAMP2,TMSB4X,YWHAE,YWHAH,RGS9,GALR2,KCNE2,TRDN,CACNG3,MAPK8IP2,KCNE4,SHANK1,FXYD6,NLGN3,SCN3B,SELENON,CLTRN,NLGN2,AHNAK,PRRT1,COA8,JPH4,OSR1,GSG1L,CNIH3,CNIH2,PIRT
2_Member	GO Biological Processes	GO:0032409	regulation of transporter activity	-6.95008	-4.88121	58/283	154,482,486,784,808,817,1020,1131,1393,1740,1756,2040,2280,2281,2669,2697,2946,3208,3755,4878,4923,4988,5031,5348,5580,5649,5774,6588,6622,6786,6844,7114,7531,7533,8787,8811,9992,10345,10368,23542,23704,50944,53826,54413,55800,57190,57393,57555,79026,80762,80863,84334,84502,130497,146395,149111,254263,644139	ADRB2,ATP1B2,FXYD2,CACNB3,CALM3,CAMK2D,CDK5,CHRM3,CRHBP,DLG2,DMD,STOM,FKBP1A,FKBP1B,GEM,GJA1,GSTM2,HPCA,KCNG1,NPPA,NTSR1,OPRM1,P2RY6,FXYD1,PRKCD,RELN,PTPN3,SLN,SNCA,STIM1,VAMP2,TMSB4X,YWHAE,YWHAH,RGS9,GALR2,KCNE2,TRDN,CACNG3,MAPK8IP2,KCNE4,SHANK1,FXYD6,NLGN3,SCN3B,SELENON,CLTRN,NLGN2,AHNAK,NDFIP1,PRRT1,COA8,JPH4,OSR1,GSG1L,CNIH3,CNIH2,PIRT
2_Member	GO Biological Processes	GO:0032412	regulation of ion transmembrane transporter activity	-6.50127	-4.50223	53/257	154,482,486,784,808,817,1020,1131,1393,1740,1756,2040,2280,2281,2669,2946,3208,3755,4878,4923,4988,5031,5348,5649,5774,6588,6786,6844,7114,7531,7533,8787,8811,9992,10345,10368,23542,23704,50944,53826,54413,55800,57190,57555,79026,80863,84334,84502,130497,146395,149111,254263,644139	ADRB2,ATP1B2,FXYD2,CACNB3,CALM3,CAMK2D,CDK5,CHRM3,CRHBP,DLG2,DMD,STOM,FKBP1A,FKBP1B,GEM,GSTM2,HPCA,KCNG1,NPPA,NTSR1,OPRM1,P2RY6,FXYD1,RELN,PTPN3,SLN,STIM1,VAMP2,TMSB4X,YWHAE,YWHAH,RGS9,GALR2,KCNE2,TRDN,CACNG3,MAPK8IP2,KCNE4,SHANK1,FXYD6,NLGN3,SCN3B,SELENON,NLGN2,AHNAK,PRRT1,COA8,JPH4,OSR1,GSG1L,CNIH3,CNIH2,PIRT
2_Member	GO Biological Processes	GO:2001257	regulation of cation channel activity	-6.32365	-4.35939	40/174	154,784,808,817,1020,1393,1740,1756,2040,2280,2281,2669,2946,3208,3755,4878,4923,4988,5031,5649,6786,6844,8787,8811,9992,10345,10368,23542,23704,50944,54413,57190,57555,79026,80863,84502,146395,149111,254263,644139	ADRB2,CACNB3,CALM3,CAMK2D,CDK5,CRHBP,DLG2,DMD,STOM,FKBP1A,FKBP1B,GEM,GSTM2,HPCA,KCNG1,NPPA,NTSR1,OPRM1,P2RY6,RELN,STIM1,VAMP2,RGS9,GALR2,KCNE2,TRDN,CACNG3,MAPK8IP2,KCNE4,SHANK1,NLGN3,SELENON,NLGN2,AHNAK,PRRT1,JPH4,GSG1L,CNIH3,CNIH2,PIRT
2_Member	GO Biological Processes	GO:0043270	positive regulation of ion transport	-6.06194	-4.14551	55/279	21,154,187,348,409,482,486,784,799,808,885,1020,1230,1622,1756,1906,2170,2316,2916,2946,3553,3784,4878,4923,5026,5031,5155,5348,5580,5649,5865,6622,6786,7114,7466,8787,8792,8811,9536,9914,9992,10345,10368,10396,22930,22953,51393,51761,54413,55800,57393,64805,84334,84876,644139	ABCA3,ADRB2,APLNR,APOE,ARRB2,ATP1B2,FXYD2,CACNB3,CALCR,CALM3,CCK,CDK5,CCR1,DBI,DMD,EDN1,FABP3,FLNA,GRM6,GSTM2,IL1B,KCNQ1,NPPA,NTSR1,P2RX5,P2RY6,PDGFB,FXYD1,PRKCD,RELN,RAB3B,SNCA,STIM1,TMSB4X,WFS1,RGS9,TNFRSF11A,GALR2,PTGES,ATP2C2,KCNE2,TRDN,CACNG3,ATP8A1,RAB3GAP1,P2RX2,TRPV2,ATP8A2,NLGN3,SCN3B,CLTRN,P2RY12,COA8,ORAI1,PIRT
2_Member	GO Biological Processes	GO:1904064	positive regulation of cation transmembrane transport	-3.67478	-2.22059	29/144	154,187,482,486,784,799,808,1020,1756,2316,2946,3784,4878,4923,5031,5348,5649,6622,6786,7114,8787,8811,9992,10345,10368,54413,57393,84334,644139	ADRB2,APLNR,ATP1B2,FXYD2,CACNB3,CALCR,CALM3,CDK5,DMD,FLNA,GSTM2,KCNQ1,NPPA,NTSR1,P2RY6,FXYD1,RELN,SNCA,STIM1,TMSB4X,RGS9,GALR2,KCNE2,TRDN,CACNG3,NLGN3,CLTRN,COA8,PIRT
2_Member	GO Biological Processes	GO:2001259	positive regulation of cation channel activity	-3.42171	-2.02754	17/69	154,784,808,1020,2946,4878,4923,5031,5649,6786,8787,8811,9992,10345,10368,54413,644139	ADRB2,CACNB3,CALM3,CDK5,GSTM2,NPPA,NTSR1,P2RY6,RELN,STIM1,RGS9,GALR2,KCNE2,TRDN,CACNG3,NLGN3,PIRT
2_Member	GO Biological Processes	GO:0032414	positive regulation of ion transmembrane transporter activity	-3.29562	-1.93147	22/103	154,482,486,784,808,1020,1756,2946,4878,4923,5031,5649,6786,7114,8787,8811,9992,10345,10368,54413,84334,644139	ADRB2,ATP1B2,FXYD2,CACNB3,CALM3,CDK5,DMD,GSTM2,NPPA,NTSR1,P2RY6,RELN,STIM1,TMSB4X,RGS9,GALR2,KCNE2,TRDN,CACNG3,NLGN3,COA8,PIRT
2_Member	GO Biological Processes	GO:0032411	positive regulation of transporter activity	-3.16397	-1.82955	23/112	154,482,486,784,808,1020,1756,2946,4878,4923,5031,5580,5649,6786,7114,8787,8811,9992,10345,10368,54413,84334,644139	ADRB2,ATP1B2,FXYD2,CACNB3,CALM3,CDK5,DMD,GSTM2,NPPA,NTSR1,P2RY6,PRKCD,RELN,STIM1,TMSB4X,RGS9,GALR2,KCNE2,TRDN,CACNG3,NLGN3,COA8,PIRT
2_Member	GO Biological Processes	GO:0034764	positive regulation of transmembrane transport	-3.06199	-1.75036	36/208	154,187,482,486,784,799,808,1020,1756,2316,2946,3479,3784,4878,4923,5031,5348,5649,6622,6786,7114,8013,8787,8811,9992,10345,10368,10776,25999,54413,57393,84334,113451,114882,388581,644139	ADRB2,APLNR,ATP1B2,FXYD2,CACNB3,CALCR,CALM3,CDK5,DMD,FLNA,GSTM2,IGF1,KCNQ1,NPPA,NTSR1,P2RY6,FXYD1,RELN,SNCA,STIM1,TMSB4X,NR4A3,RGS9,GALR2,KCNE2,TRDN,CACNG3,ARPP19,CLIP3,NLGN3,CLTRN,COA8,AZIN2,OSBPL8,C1QTNF12,PIRT
2_Member	GO Biological Processes	GO:0034767	positive regulation of ion transmembrane transport	-2.94074	-1.66498	29/159	154,187,482,486,784,799,808,1020,1756,2316,2946,3784,4878,4923,5031,5348,5649,6622,6786,7114,8787,8811,9992,10345,10368,54413,57393,84334,644139	ADRB2,APLNR,ATP1B2,FXYD2,CACNB3,CALCR,CALM3,CDK5,DMD,FLNA,GSTM2,KCNQ1,NPPA,NTSR1,P2RY6,FXYD1,RELN,SNCA,STIM1,TMSB4X,RGS9,GALR2,KCNE2,TRDN,CACNG3,NLGN3,CLTRN,COA8,PIRT
3_Summary	GO Biological Processes	GO:0042391	regulation of membrane potential	-16.8508	-13.2701	104/431	40,116,154,215,409,482,572,784,808,817,834,869,885,948,1020,1136,1140,1142,1268,1525,1756,1811,1906,2281,2316,2550,2555,2556,2558,2560,2564,2565,2629,2697,2742,2895,2897,2898,2899,2900,2905,2911,3725,3728,3776,3777,3781,3784,3786,4355,4878,4915,4923,4988,5026,5348,5649,5764,5774,5831,6326,6328,6332,6335,6508,6543,6640,6804,7415,7476,7531,7533,8001,8326,8671,8973,9177,9948,9992,10242,10345,11280,2…	ASIC2,ADCYAP1,ADRB2,ABCD1,ARRB2,ATP1B2,BAD,CACNB3,CALM3,CAMK2D,CASP1,CBLN1,CCK,CD36,CDK5,CHRNA3,CHRNB1,CHRNB3,CNR1,CXADR,DMD,SLC26A3,EDN1,FKBP1B,FLNA,GABBR1,GABRA2,GABRA3,GABRA5,GABRB1,GABRE,GABRG1,GBA,GJA1,GLRA2,GRID2,GRIK1,GRIK2,GRIK3,GRIK4,GRIN2C,GRM1,JUN,JUP,KCNK2,KCNK3,KCNN2,KCNQ1,KCNQ3,MPP2,NPPA,NTRK2,NTSR1,OPRM1,P2RX5,FXYD1,RELN,PTN,PTPN3,PYCR1,SCN2A,SCN3A,SCN7A,SCN9A,SLC4A3,SLC8A2,SNTA1,S…
3_Member	GO Biological Processes	GO:0042391	regulation of membrane potential	-16.8508	-13.2701	104/431	40,116,154,215,409,482,572,784,808,817,834,869,885,948,1020,1136,1140,1142,1268,1525,1756,1811,1906,2281,2316,2550,2555,2556,2558,2560,2564,2565,2629,2697,2742,2895,2897,2898,2899,2900,2905,2911,3725,3728,3776,3777,3781,3784,3786,4355,4878,4915,4923,4988,5026,5348,5649,5764,5774,5831,6326,6328,6332,6335,6508,6543,6640,6804,7415,7476,7531,7533,8001,8326,8671,8973,9177,9948,9992,10242,10345,11280,2…	ASIC2,ADCYAP1,ADRB2,ABCD1,ARRB2,ATP1B2,BAD,CACNB3,CALM3,CAMK2D,CASP1,CBLN1,CCK,CD36,CDK5,CHRNA3,CHRNB1,CHRNB3,CNR1,CXADR,DMD,SLC26A3,EDN1,FKBP1B,FLNA,GABBR1,GABRA2,GABRA3,GABRA5,GABRB1,GABRE,GABRG1,GBA,GJA1,GLRA2,GRID2,GRIK1,GRIK2,GRIK3,GRIK4,GRIN2C,GRM1,JUN,JUP,KCNK2,KCNK3,KCNN2,KCNQ1,KCNQ3,MPP2,NPPA,NTRK2,NTSR1,OPRM1,P2RX5,FXYD1,RELN,PTN,PTPN3,PYCR1,SCN2A,SCN3A,SCN7A,SCN9A,SLC4A3,SLC8A2,SNTA1,S…
3_Member	GO Biological Processes	GO:0060078	regulation of postsynaptic membrane potential	-12.0501	-9.2097	44/136	116,154,409,784,869,1020,1136,1140,1142,2550,2555,2556,2558,2560,2564,2565,2742,2895,2897,2898,2899,2900,2905,2911,4355,4923,4988,5026,5649,6543,6804,7476,8001,8973,22930,22953,23542,50944,54413,56853,57555,66000,116443,124925	ADCYAP1,ADRB2,ARRB2,CACNB3,CBLN1,CDK5,CHRNA3,CHRNB1,CHRNB3,GABBR1,GABRA2,GABRA3,GABRA5,GABRB1,GABRE,GABRG1,GLRA2,GRID2,GRIK1,GRIK2,GRIK3,GRIK4,GRIN2C,GRM1,MPP2,NTSR1,OPRM1,P2RX5,RELN,SLC8A2,STX1A,WNT7A,GLRA3,CHRNA6,RAB3GAP1,P2RX2,MAPK8IP2,SHANK1,NLGN3,CELF4,NLGN2,TMEM108,GRIN3A,SEZ6
3_Member	GO Biological Processes	GO:0099565	chemical synaptic transmission, postsynaptic	-7.63875	-5.43213	31/105	154,409,784,869,1020,1136,1140,1142,2742,2895,2898,2905,4355,4923,4988,5026,5649,6543,6804,7476,8001,8973,22930,22953,23542,50944,54413,56853,57555,66000,124925	ADRB2,ARRB2,CACNB3,CBLN1,CDK5,CHRNA3,CHRNB1,CHRNB3,GLRA2,GRID2,GRIK2,GRIN2C,MPP2,NTSR1,OPRM1,P2RX5,RELN,SLC8A2,STX1A,WNT7A,GLRA3,CHRNA6,RAB3GAP1,P2RX2,MAPK8IP2,SHANK1,NLGN3,CELF4,NLGN2,TMEM108,SEZ6
3_Member	GO Biological Processes	GO:0060079	excitatory postsynaptic potential	-7.59031	-5.39575	30/100	154,409,784,869,1020,1136,1140,1142,2742,2895,2898,2905,4355,4988,5026,5649,6543,6804,7476,8001,8973,22930,22953,23542,50944,54413,56853,57555,66000,124925	ADRB2,ARRB2,CACNB3,CBLN1,CDK5,CHRNA3,CHRNB1,CHRNB3,GLRA2,GRID2,GRIK2,GRIN2C,MPP2,OPRM1,P2RX5,RELN,SLC8A2,STX1A,WNT7A,GLRA3,CHRNA6,RAB3GAP1,P2RX2,MAPK8IP2,SHANK1,NLGN3,CELF4,NLGN2,TMEM108,SEZ6
3_Member	GO Biological Processes	GO:0031644	regulation of neurological system process	-4.07239	-2.52372	29/137	154,784,869,885,1890,1906,1910,2171,2629,2911,3358,4856,4885,4923,4988,5649,6543,6804,7476,9607,11280,23467,50944,54413,56853,57555,57596,66000,254263	ADRB2,CACNB3,CBLN1,CCK,TYMP,EDN1,EDNRB,FABP5,GBA,GRM1,HTR2C,CCN3,NPTX2,NTSR1,OPRM1,RELN,SLC8A2,STX1A,WNT7A,CARTPT,SCN11A,NPTXR,SHANK1,NLGN3,CELF4,NLGN2,BEGAIN,TMEM108,CNIH2
3_Member	GO Biological Processes	GO:0098815	modulation of excitatory postsynaptic potential	-2.99001	-1.70592	12/44	154,784,869,5649,6543,6804,7476,50944,54413,56853,57555,66000	ADRB2,CACNB3,CBLN1,RELN,SLC8A2,STX1A,WNT7A,SHANK1,NLGN3,CELF4,NLGN2,TMEM108
3_Member	GO Biological Processes	GO:2000463	positive regulation of excitatory postsynaptic potential	-2.39925	-1.2628	8/27	154,784,5649,6804,7476,50944,54413,57555	ADRB2,CACNB3,RELN,STX1A,WNT7A,SHANK1,NLGN3,NLGN2
4_Summary	GO Biological Processes	GO:0060322	head development	-16.6252	-13.1542	152/751	116,190,205,317,358,409,463,482,493,547,572,585,597,808,869,881,1020,1063,1445,1662,1767,2044,2290,2316,2334,2356,2523,2534,2558,2629,2735,2737,2746,2775,2895,2905,3157,3208,3280,3337,3549,3777,3912,3925,4086,4129,4487,4826,4851,4852,4915,4929,4983,5019,5021,5050,5156,5592,5594,5595,5649,5727,5764,5793,6091,6092,6271,6423,6585,6586,6608,6662,6712,6751,6752,6860,6887,7026,7101,7301,7337,7476,7477,…	ADCYAP1,NR0B1,AK4,APAF1,AQP1,ARRB2,ZFHX3,ATP1B2,ATP2B4,KIF1A,BAD,BBS4,BCL2A1,CALM3,CBLN1,CCIN,CDK5,CENPF,CSK,DDX10,DNAH5,EPHA5,FOXG1,FLNA,AFF2,FPGS,FUT1,FYN,GABRA5,GBA,GLI1,GLI3,GLUD1,GNAO1,GRID2,GRIN2C,HMGCS1,HPCA,HES1,DNAJB1,IHH,KCNK3,LAMB1,STMN1,SMAD1,MAOB,MSX1,NNAT,NOTCH1,NPY,NTRK2,NR4A2,OPHN1,OXCT1,OXTR,PAFAH1B3,PDGFRA,PRKG1,MAPK1,MAPK3,RELN,PTCH1,PTN,PTPRG,ROBO1,ROBO2,S100A1,SFRP2,SLIT1,SLI…
4_Member	GO Biological Processes	GO:0060322	head development	-16.6252	-13.1542	152/751	116,190,205,317,358,409,463,482,493,547,572,585,597,808,869,881,1020,1063,1445,1662,1767,2044,2290,2316,2334,2356,2523,2534,2558,2629,2735,2737,2746,2775,2895,2905,3157,3208,3280,3337,3549,3777,3912,3925,4086,4129,4487,4826,4851,4852,4915,4929,4983,5019,5021,5050,5156,5592,5594,5595,5649,5727,5764,5793,6091,6092,6271,6423,6585,6586,6608,6662,6712,6751,6752,6860,6887,7026,7101,7301,7337,7476,7477,…	ADCYAP1,NR0B1,AK4,APAF1,AQP1,ARRB2,ZFHX3,ATP1B2,ATP2B4,KIF1A,BAD,BBS4,BCL2A1,CALM3,CBLN1,CCIN,CDK5,CENPF,CSK,DDX10,DNAH5,EPHA5,FOXG1,FLNA,AFF2,FPGS,FUT1,FYN,GABRA5,GBA,GLI1,GLI3,GLUD1,GNAO1,GRID2,GRIN2C,HMGCS1,HPCA,HES1,DNAJB1,IHH,KCNK3,LAMB1,STMN1,SMAD1,MAOB,MSX1,NNAT,NOTCH1,NPY,NTRK2,NR4A2,OPHN1,OXCT1,OXTR,PAFAH1B3,PDGFRA,PRKG1,MAPK1,MAPK3,RELN,PTCH1,PTN,PTPRG,ROBO1,ROBO2,S100A1,SFRP2,SLIT1,SLI…
4_Member	GO Biological Processes	GO:0007420	brain development	-16.61	-13.1542	146/710	116,190,205,317,358,409,463,482,493,547,572,585,597,808,869,881,1020,1063,1445,1767,2044,2290,2316,2334,2356,2523,2534,2558,2629,2735,2737,2746,2775,2895,2905,3157,3208,3280,3337,3777,3912,3925,4086,4129,4487,4826,4851,4852,4915,4929,4983,5019,5021,5050,5592,5649,5727,5764,5793,6091,6092,6271,6423,6585,6586,6608,6712,6751,6752,6860,6887,7026,7101,7301,7337,7476,7477,7531,7533,7852,8321,8655,8704,…	ADCYAP1,NR0B1,AK4,APAF1,AQP1,ARRB2,ZFHX3,ATP1B2,ATP2B4,KIF1A,BAD,BBS4,BCL2A1,CALM3,CBLN1,CCIN,CDK5,CENPF,CSK,DNAH5,EPHA5,FOXG1,FLNA,AFF2,FPGS,FUT1,FYN,GABRA5,GBA,GLI1,GLI3,GLUD1,GNAO1,GRID2,GRIN2C,HMGCS1,HPCA,HES1,DNAJB1,KCNK3,LAMB1,STMN1,SMAD1,MAOB,MSX1,NNAT,NOTCH1,NPY,NTRK2,NR4A2,OPHN1,OXCT1,OXTR,PAFAH1B3,PRKG1,RELN,PTCH1,PTN,PTPRG,ROBO1,ROBO2,S100A1,SFRP2,SLIT1,SLIT3,SMO,SPTBN2,SSTR1,SSTR2,SYT…
4_Member	GO Biological Processes	GO:0030900	forebrain development	-10.8383	-8.11288	79/358	116,190,317,358,482,493,547,572,585,597,1020,1767,2044,2290,2316,2523,2534,2735,2737,2775,3280,3337,3912,4487,4851,4852,4915,4929,4983,5021,5592,5649,5764,6091,6092,6585,6586,6608,6751,6752,6887,7026,7101,7301,7476,7477,7852,8828,9253,9289,10092,10718,22809,22930,23334,23657,25987,26038,54361,55970,63827,63925,63974,64805,66000,79143,79600,79969,80055,83696,84623,84687,139411,146760,170302,284403…	ADCYAP1,NR0B1,APAF1,AQP1,ATP1B2,ATP2B4,KIF1A,BAD,BBS4,BCL2A1,CDK5,DNAH5,EPHA5,FOXG1,FLNA,FUT1,FYN,GLI1,GLI3,GNAO1,HES1,DNAJB1,LAMB1,MSX1,NOTCH1,NPY,NTRK2,NR4A2,OPHN1,OXTR,PRKG1,RELN,PTN,ROBO1,ROBO2,SLIT1,SLIT3,SMO,SSTR1,SSTR2,TAL2,NR2F2,NR2E1,TYRO3,WNT7A,WNT7B,CXCR4,NRP2,NUMBL,ADGRG1,ARPC5,NRG3,ATF5,RAB3GAP1,SZT2,SLC7A11,TSKU,CHD5,WNT4,GNG12,BCAN,ZNF335,NEUROD6,P2RY12,TMEM108,MBOAT7,TCTN1,ATAT1,P…
4_Member	GO Biological Processes	GO:0021537	telencephalon development	-7.00724	-4.92017	51/235	358,482,493,572,585,597,1020,1767,2044,2290,2316,2523,2737,3280,3912,4852,4915,5021,5649,6091,6092,6585,6586,6608,7101,7852,8828,9253,9289,10718,22809,23334,23657,25987,55970,63827,63974,64805,66000,79143,79600,79969,83696,84623,84687,146760,170302,284403,317762,374946,388585	AQP1,ATP1B2,ATP2B4,BAD,BBS4,BCL2A1,CDK5,DNAH5,EPHA5,FOXG1,FLNA,FUT1,GLI3,HES1,LAMB1,NPY,NTRK2,OXTR,RELN,ROBO1,ROBO2,SLIT1,SLIT3,SMO,NR2E1,CXCR4,NRP2,NUMBL,ADGRG1,NRG3,ATF5,SZT2,SLC7A11,TSKU,GNG12,BCAN,NEUROD6,P2RY12,TMEM108,MBOAT7,TCTN1,ATAT1,TRAPPC9,KIRREL3,PPP1R9B,RTN4RL1,ARX,WDR62,CCDC85C,DRAXIN,HES5
4_Member	GO Biological Processes	GO:0021543	pallium development	-3.98331	-2.45515	32/159	493,572,585,597,1020,2044,2290,2316,2737,3912,4852,4915,5649,6091,6608,7101,8828,9289,25987,55970,63827,63974,64805,66000,79143,79969,83696,84623,84687,170302,284403,317762	ATP2B4,BAD,BBS4,BCL2A1,CDK5,EPHA5,FOXG1,FLNA,GLI3,LAMB1,NPY,NTRK2,RELN,ROBO1,SMO,NR2E1,NRP2,ADGRG1,TSKU,GNG12,BCAN,NEUROD6,P2RY12,TMEM108,MBOAT7,ATAT1,TRAPPC9,KIRREL3,PPP1R9B,ARX,WDR62,CCDC85C
4_Member	GO Biological Processes	GO:0021987	cerebral cortex development	-3.6869	-2.22836	24/110	572,585,597,1020,2290,2316,2737,3912,4852,4915,5649,6091,6608,7101,8828,9289,55970,64805,79143,83696,84687,170302,284403,317762	BAD,BBS4,BCL2A1,CDK5,FOXG1,FLNA,GLI3,LAMB1,NPY,NTRK2,RELN,ROBO1,SMO,NR2E1,NRP2,ADGRG1,GNG12,P2RY12,MBOAT7,TRAPPC9,PPP1R9B,ARX,WDR62,CCDC85C
4_Member	GO Biological Processes	GO:0021761	limbic system development	-2.41973	-1.27962	19/98	190,493,585,1020,2044,2737,5649,6608,7101,8828,10092,22930,25987,63827,63974,66000,79969,84623,84687	NR0B1,ATP2B4,BBS4,CDK5,EPHA5,GLI3,RELN,SMO,NR2E1,NRP2,ARPC5,RAB3GAP1,TSKU,BCAN,NEUROD6,TMEM108,ATAT1,KIRREL3,PPP1R9B
4_Member	GO Biological Processes	GO:0021766	hippocampus development	-2.26211	-1.16826	15/73	493,585,1020,2044,2737,5649,6608,7101,25987,63827,63974,66000,79969,84623,84687	ATP2B4,BBS4,CDK5,EPHA5,GLI3,RELN,SMO,NR2E1,TSKU,BCAN,NEUROD6,TMEM108,ATAT1,KIRREL3,PPP1R9B
5_Summary	GO Biological Processes	GO:0050808	synapse organization	-16.0168	-12.6122	99/411	40,71,87,348,547,575,577,627,714,784,869,1006,1007,1020,1140,1488,1501,1607,1948,1981,2064,2239,2316,2534,2555,2596,2823,2895,3897,3913,4915,4983,5021,5064,5098,5300,5649,5764,5792,5818,6092,6543,6585,6622,6623,6640,6678,6712,7337,7415,7476,7477,7534,8321,8326,8828,8927,8934,9148,9379,10082,10160,10611,10882,11079,22953,23129,23184,23284,23654,23657,27253,50944,54413,55737,55752,56850,57497,57555…	ASIC2,ACTG1,ACTN1,APOE,KIF1A,ADGRB1,ADGRB3,BDNF,C1QC,CACNB3,CBLN1,CDH8,CDH9,CDK5,CHRNB1,CTBP2,CTNND2,DGKB,EFNB2,EIF4G1,ERBB2,GPC4,FLNA,FYN,GABRA2,GAP43,GPM6A,GRID2,L1CAM,LAMB2,NTRK2,OPHN1,OXTR,PALM,PCDHGC3,PIN1,RELN,PTN,PTPRF,NECTIN1,ROBO2,SLC8A2,SLIT1,SNCA,SNCG,SNTA1,SPARC,SPTBN2,UBE3A,VCP,WNT7A,WNT7B,YWHAZ,FZD1,FZD9,NRP2,BSN,RAB29,NEURL1,NRXN2,GPC6,FARP1,PDLIM5,C1QL1,RER1,P2RX2,PLXND1,MESD,ADGR…
5_Member	GO Biological Processes	GO:0050808	synapse organization	-16.0168	-12.6122	99/411	40,71,87,348,547,575,577,627,714,784,869,1006,1007,1020,1140,1488,1501,1607,1948,1981,2064,2239,2316,2534,2555,2596,2823,2895,3897,3913,4915,4983,5021,5064,5098,5300,5649,5764,5792,5818,6092,6543,6585,6622,6623,6640,6678,6712,7337,7415,7476,7477,7534,8321,8326,8828,8927,8934,9148,9379,10082,10160,10611,10882,11079,22953,23129,23184,23284,23654,23657,27253,50944,54413,55737,55752,56850,57497,57555…	ASIC2,ACTG1,ACTN1,APOE,KIF1A,ADGRB1,ADGRB3,BDNF,C1QC,CACNB3,CBLN1,CDH8,CDH9,CDK5,CHRNB1,CTBP2,CTNND2,DGKB,EFNB2,EIF4G1,ERBB2,GPC4,FLNA,FYN,GABRA2,GAP43,GPM6A,GRID2,L1CAM,LAMB2,NTRK2,OPHN1,OXTR,PALM,PCDHGC3,PIN1,RELN,PTN,PTPRF,NECTIN1,ROBO2,SLC8A2,SLIT1,SNCA,SNCG,SNTA1,SPARC,SPTBN2,UBE3A,VCP,WNT7A,WNT7B,YWHAZ,FZD1,FZD9,NRP2,BSN,RAB29,NEURL1,NRXN2,GPC6,FARP1,PDLIM5,C1QL1,RER1,P2RX2,PLXND1,MESD,ADGR…
5_Member	GO Biological Processes	GO:0007416	synapse assembly	-11.4957	-8.70504	50/173	40,575,577,627,869,1007,1020,1948,1981,2239,2555,2596,2823,2895,4915,5021,5818,6092,6585,6622,6712,7476,8321,8927,8934,9379,10082,10160,10611,23129,23284,23654,27253,50944,54413,55737,57555,64218,78999,79414,84189,84623,84628,91156,114798,266727,347730,347902,375790,441381	ASIC2,ADGRB1,ADGRB3,BDNF,CBLN1,CDH9,CDK5,EFNB2,EIF4G1,GPC4,GABRA2,GAP43,GPM6A,GRID2,NTRK2,OXTR,NECTIN1,ROBO2,SLIT1,SNCA,SPTBN2,WNT7A,FZD1,BSN,RAB29,NRXN2,GPC6,FARP1,PDLIM5,PLXND1,ADGRL3,PLXNB2,PCDH17,SHANK1,NLGN3,VPS35,NLGN2,SEMA4A,LRFN4,LRFN3,SLITRK6,KIRREL3,NTNG2,IGFN1,SLITRK1,MDGA1,LRRTM1,AMIGO2,AGRN,LRRC24
5_Member	GO Biological Processes	GO:0050803	regulation of synapse structure or activity	-11.109	-8.35211	58/223	40,348,547,575,577,627,869,1006,1020,1607,1981,2239,2534,2596,2823,2895,4600,4915,5021,5649,5764,5818,6092,6585,6622,6678,7337,7415,7476,7534,8326,8828,9148,10082,10611,23184,23657,54413,55737,55752,56850,57030,57497,57555,64218,78999,79012,79414,84189,84628,114798,203068,246213,266727,347730,347902,375790,441381	ASIC2,APOE,KIF1A,ADGRB1,ADGRB3,BDNF,CBLN1,CDH8,CDK5,DGKB,EIF4G1,GPC4,FYN,GAP43,GPM6A,GRID2,MX2,NTRK2,OXTR,RELN,PTN,NECTIN1,ROBO2,SLIT1,SNCA,SPARC,UBE3A,VCP,WNT7A,YWHAZ,FZD9,NRP2,NEURL1,GPC6,PDLIM5,MESD,SLC7A11,NLGN3,VPS35,SEPTIN11,GRIPAP1,SLC17A7,LRFN2,NLGN2,SEMA4A,LRFN4,CAMKV,LRFN3,SLITRK6,NTNG2,SLITRK1,TUBB,SLC17A8,MDGA1,LRRTM1,AMIGO2,AGRN,LRRC24
5_Member	GO Biological Processes	GO:0050807	regulation of synapse organization	-10.4408	-7.79791	55/213	40,348,547,575,577,627,869,1006,1020,1607,1981,2239,2534,2596,2823,2895,4915,5021,5649,5764,5818,6092,6585,6622,6678,7337,7415,7476,7534,8326,8828,9148,10082,10611,23184,23657,54413,55737,55752,56850,57497,57555,64218,78999,79012,79414,84189,84628,114798,203068,266727,347730,347902,375790,441381	ASIC2,APOE,KIF1A,ADGRB1,ADGRB3,BDNF,CBLN1,CDH8,CDK5,DGKB,EIF4G1,GPC4,FYN,GAP43,GPM6A,GRID2,NTRK2,OXTR,RELN,PTN,NECTIN1,ROBO2,SLIT1,SNCA,SPARC,UBE3A,VCP,WNT7A,YWHAZ,FZD9,NRP2,NEURL1,GPC6,PDLIM5,MESD,SLC7A11,NLGN3,VPS35,SEPTIN11,GRIPAP1,LRFN2,NLGN2,SEMA4A,LRFN4,CAMKV,LRFN3,SLITRK6,NTNG2,SLITRK1,TUBB,MDGA1,LRRTM1,AMIGO2,AGRN,LRRC24
5_Member	GO Biological Processes	GO:0051963	regulation of synapse assembly	-9.3325	-6.89267	32/96	40,575,577,627,869,1981,2239,2596,2895,4915,5021,5818,6092,6585,6622,7476,10082,10611,54413,55737,57555,64218,78999,79414,84189,84628,114798,266727,347730,347902,375790,441381	ASIC2,ADGRB1,ADGRB3,BDNF,CBLN1,EIF4G1,GPC4,GAP43,GRID2,NTRK2,OXTR,NECTIN1,ROBO2,SLIT1,SNCA,WNT7A,GPC6,PDLIM5,NLGN3,VPS35,NLGN2,SEMA4A,LRFN4,LRFN3,SLITRK6,NTNG2,SLITRK1,MDGA1,LRRTM1,AMIGO2,AGRN,LRRC24
5_Member	GO Biological Processes	GO:0099054	presynapse assembly	-8.15737	-5.88483	20/47	869,1948,1981,2239,6622,7476,8321,8927,10082,27253,54413,55737,57555,78999,79414,84189,84628,114798,266727,347730	CBLN1,EFNB2,EIF4G1,GPC4,SNCA,WNT7A,FZD1,BSN,GPC6,PCDH17,NLGN3,VPS35,NLGN2,LRFN4,LRFN3,SLITRK6,NTNG2,SLITRK1,MDGA1,LRRTM1
5_Member	GO Biological Processes	GO:0099172	presynapse organization	-7.60302	-5.40548	20/50	869,1948,1981,2239,6622,7476,8321,8927,10082,27253,54413,55737,57555,78999,79414,84189,84628,114798,266727,347730	CBLN1,EFNB2,EIF4G1,GPC4,SNCA,WNT7A,FZD1,BSN,GPC6,PCDH17,NLGN3,VPS35,NLGN2,LRFN4,LRFN3,SLITRK6,NTNG2,SLITRK1,MDGA1,LRRTM1
5_Member	GO Biological Processes	GO:0099174	regulation of presynapse organization	-6.27667	-4.32088	14/31	869,1981,2239,6622,7476,10082,55737,78999,79414,84189,84628,114798,266727,347730	CBLN1,EIF4G1,GPC4,SNCA,WNT7A,GPC6,VPS35,LRFN4,LRFN3,SLITRK6,NTNG2,SLITRK1,MDGA1,LRRTM1
5_Member	GO Biological Processes	GO:1905606	regulation of presynapse assembly	-6.27667	-4.32088	14/31	869,1981,2239,6622,7476,10082,55737,78999,79414,84189,84628,114798,266727,347730	CBLN1,EIF4G1,GPC4,SNCA,WNT7A,GPC6,VPS35,LRFN4,LRFN3,SLITRK6,NTNG2,SLITRK1,MDGA1,LRRTM1
5_Member	GO Biological Processes	GO:0099560	synaptic membrane adhesion	-4.91492	-3.19848	11/25	1007,2239,5792,10082,27253,57689,78999,79414,84628,114798,266727	CDH9,GPC4,PTPRF,GPC6,PCDH17,LRRC4C,LRFN4,LRFN3,NTNG2,SLITRK1,MDGA1
5_Member	GO Biological Processes	GO:0099173	postsynapse organization	-4.63934	-2.97328	34/161	71,87,348,547,869,1020,1140,1501,1607,2534,2596,2895,4983,5649,5764,6712,7337,7476,8326,8828,9379,10611,11079,23184,23657,50944,54413,55737,57497,57555,66000,78999,84628,347730	ACTG1,ACTN1,APOE,KIF1A,CBLN1,CDK5,CHRNB1,CTNND2,DGKB,FYN,GAP43,GRID2,OPHN1,RELN,PTN,SPTBN2,UBE3A,WNT7A,FZD9,NRP2,NRXN2,PDLIM5,RER1,MESD,SLC7A11,SHANK1,NLGN3,VPS35,LRFN2,NLGN2,TMEM108,LRFN4,NTNG2,LRRTM1
5_Member	GO Biological Processes	GO:0051965	positive regulation of synapse assembly	-4.3311	-2.72807	17/59	40,575,577,627,869,2895,4915,5021,7476,54413,57555,64218,84189,114798,347902,375790,441381	ASIC2,ADGRB1,ADGRB3,BDNF,CBLN1,GRID2,NTRK2,OXTR,WNT7A,NLGN3,NLGN2,SEMA4A,SLITRK6,SLITRK1,AMIGO2,AGRN,LRRC24
5_Member	GO Biological Processes	GO:0099175	regulation of postsynapse organization	-3.13153	-1.80605	21/99	348,547,869,1020,1607,2534,2596,2895,5649,5764,7337,7476,8326,8828,10611,23184,23657,55737,57497,78999,347730	APOE,KIF1A,CBLN1,CDK5,DGKB,FYN,GAP43,GRID2,RELN,PTN,UBE3A,WNT7A,FZD9,NRP2,PDLIM5,MESD,SLC7A11,VPS35,LRFN2,LRFN4,LRRTM1
6_Summary	GO Biological Processes	GO:0009636	response to toxic substance	-15.6068	-12.2479	113/506	113,116,348,358,445,572,670,808,948,1026,1036,1136,1140,1142,1268,1393,1728,1816,1906,1978,2052,2281,2534,2560,2742,2775,2879,2946,3039,3040,3042,3046,3047,3048,3049,3050,3208,3248,3383,3725,3939,4067,4129,4257,4353,4487,4489,4490,4493,4494,4495,4496,4499,4501,4502,4602,4924,4929,4968,4988,5019,5021,5052,5155,5445,5446,5465,5580,5594,5595,5598,5603,5831,5950,6191,6335,6415,6678,7284,7295,7337,801…	ADCY7,ADCYAP1,APOE,AQP1,ASS1,BAD,BPHL,CALM3,CD36,CDKN1A,CDO1,CHRNA3,CHRNB1,CHRNB3,CNR1,CRHBP,NQO1,DRD5,EDN1,EIF4EBP1,EPHX1,FKBP1B,FYN,GABRB1,GLRA2,GNAO1,GPX4,GSTM2,HBA1,HBA2,HBM,HBE1,HBG1,HBG2,HBQ1,HBZ,HPCA,HPGD,ICAM1,JUN,LDHA,LYN,MAOB,MGST1,MPO,MSX1,MT1A,MT1B,MT1E,MT1F,MT1G,MT1H,MT1M,MT1X,MT2A,MYB,NUCB1,NR4A2,OGG1,OPRM1,OXCT1,OXTR,PRDX1,PDGFB,PON2,PON3,PPARA,PRKCD,MAPK1,MAPK3,MAPK7,MAPK13,PYCR1,…
6_Member	GO Biological Processes	GO:0009636	response to toxic substance	-15.6068	-12.2479	113/506	113,116,348,358,445,572,670,808,948,1026,1036,1136,1140,1142,1268,1393,1728,1816,1906,1978,2052,2281,2534,2560,2742,2775,2879,2946,3039,3040,3042,3046,3047,3048,3049,3050,3208,3248,3383,3725,3939,4067,4129,4257,4353,4487,4489,4490,4493,4494,4495,4496,4499,4501,4502,4602,4924,4929,4968,4988,5019,5021,5052,5155,5445,5446,5465,5580,5594,5595,5598,5603,5831,5950,6191,6335,6415,6678,7284,7295,7337,801…	ADCY7,ADCYAP1,APOE,AQP1,ASS1,BAD,BPHL,CALM3,CD36,CDKN1A,CDO1,CHRNA3,CHRNB1,CHRNB3,CNR1,CRHBP,NQO1,DRD5,EDN1,EIF4EBP1,EPHX1,FKBP1B,FYN,GABRB1,GLRA2,GNAO1,GPX4,GSTM2,HBA1,HBA2,HBM,HBE1,HBG1,HBG2,HBQ1,HBZ,HPCA,HPGD,ICAM1,JUN,LDHA,LYN,MAOB,MGST1,MPO,MSX1,MT1A,MT1B,MT1E,MT1F,MT1G,MT1H,MT1M,MT1X,MT2A,MYB,NUCB1,NR4A2,OGG1,OPRM1,OXCT1,OXTR,PRDX1,PDGFB,PON2,PON3,PPARA,PRKCD,MAPK1,MAPK3,MAPK7,MAPK13,PYCR1,…
6_Member	GO Biological Processes	GO:0098754	detoxification	-10.1864	-7.60569	41/136	348,948,1728,2879,2946,3039,3040,3042,3046,3047,3048,3049,3050,4257,4353,4489,4490,4493,4494,4495,4496,4499,4501,4502,5052,5446,6415,7295,9536,9973,10549,22977,23334,23410,54996,55937,64359,114112,114757,127281,195827	APOE,CD36,NQO1,GPX4,GSTM2,HBA1,HBA2,HBM,HBE1,HBG1,HBG2,HBQ1,HBZ,MGST1,MPO,MT1A,MT1B,MT1E,MT1F,MT1G,MT1H,MT1M,MT1X,MT2A,PRDX1,PON3,SELENOW,TXN,PTGES,CCS,PRDX4,AKR7A3,SZT2,SIRT3,MTARC2,APOM,NXN,TXNRD3,CYGB,PRXL2B,PRXL2C
6_Member	GO Biological Processes	GO:0098869	cellular oxidant detoxification	-6.40722	-4.42506	29/106	348,948,1728,2879,2946,3039,3040,3042,3046,3047,3048,3049,3050,4257,4353,5052,6415,7295,9536,9973,10549,23334,23410,55937,64359,114112,114757,127281,195827	APOE,CD36,NQO1,GPX4,GSTM2,HBA1,HBA2,HBM,HBE1,HBG1,HBG2,HBQ1,HBZ,MGST1,MPO,PRDX1,SELENOW,TXN,PTGES,CCS,PRDX4,SZT2,SIRT3,APOM,NXN,TXNRD3,CYGB,PRXL2B,PRXL2C
6_Member	GO Biological Processes	GO:0097237	cellular response to toxic substance	-6.03194	-4.11864	50/245	113,348,358,572,948,1728,2742,2879,2946,3039,3040,3042,3046,3047,3048,3049,3050,4257,4353,4487,4602,5052,5155,5580,5598,5603,5831,6415,7295,8013,9536,9973,10280,10494,10549,10974,23334,23410,51157,54996,55364,55937,57332,64359,84557,114112,114757,127281,140885,195827	ADCY7,APOE,AQP1,BAD,CD36,NQO1,GLRA2,GPX4,GSTM2,HBA1,HBA2,HBM,HBE1,HBG1,HBG2,HBQ1,HBZ,MGST1,MPO,MSX1,MYB,PRDX1,PDGFB,PRKCD,MAPK7,MAPK13,PYCR1,SELENOW,TXN,NR4A3,PTGES,CCS,SIGMAR1,STK25,PRDX4,ADIRF,SZT2,SIRT3,ZNF580,MTARC2,IMPACT,APOM,CBX8,NXN,MAP1LC3A,TXNRD3,CYGB,PRXL2B,SIRPA,PRXL2C
6_Member	GO Biological Processes	GO:1990748	cellular detoxification	-5.78186	-3.9101	30/119	348,948,1728,2879,2946,3039,3040,3042,3046,3047,3048,3049,3050,4257,4353,5052,6415,7295,9536,9973,10549,23334,23410,54996,55937,64359,114112,114757,127281,195827	APOE,CD36,NQO1,GPX4,GSTM2,HBA1,HBA2,HBM,HBE1,HBG1,HBG2,HBQ1,HBZ,MGST1,MPO,PRDX1,SELENOW,TXN,PTGES,CCS,PRDX4,SZT2,SIRT3,MTARC2,APOM,NXN,TXNRD3,CYGB,PRXL2B,PRXL2C
6_Member	GO Biological Processes	GO:0015671	oxygen transport	-5.52963	-3.70209	9/15	3039,3040,3042,3046,3047,3048,3049,3050,114757	HBA1,HBA2,HBM,HBE1,HBG1,HBG2,HBQ1,HBZ,CYGB
6_Member	GO Biological Processes	GO:0015669	gas transport	-5.12878	-3.36205	10/20	358,3039,3040,3042,3046,3047,3048,3049,3050,114757	AQP1,HBA1,HBA2,HBM,HBE1,HBG1,HBG2,HBQ1,HBZ,CYGB
6_Member	GO Biological Processes	GO:0042744	hydrogen peroxide catabolic process	-4.62648	-2.96393	12/31	3039,3040,3042,3046,3047,3048,3049,3050,4353,5052,6622,10549	HBA1,HBA2,HBM,HBE1,HBG1,HBG2,HBQ1,HBZ,MPO,PRDX1,SNCA,PRDX4
6_Member	GO Biological Processes	GO:0051187	cofactor catabolic process	-4.36886	-2.75781	19/70	215,645,3039,3040,3042,3046,3047,3048,3049,3050,4353,5052,6622,7415,10549,10588,10840,66002,200035	ABCD1,BLVRB,HBA1,HBA2,HBM,HBE1,HBG1,HBG2,HBQ1,HBZ,MPO,PRDX1,SNCA,VCP,PRDX4,MTHFS,ALDH1L1,CYP4F12,NUDT17
6_Member	GO Biological Processes	GO:0042737	drug catabolic process	-4.29447	-2.69824	30/140	217,1118,1512,1562,1565,1806,2184,2731,3039,3040,3042,3046,3047,3048,3049,3050,4128,4129,4353,5019,5052,5092,5106,6622,6898,10549,10588,26002,55577,259307	ALDH2,CHIT1,CTSH,CYP2C18,CYP2D6,DPYD,FAH,GLDC,HBA1,HBA2,HBM,HBE1,HBG1,HBG2,HBQ1,HBZ,MAOA,MAOB,MPO,OXCT1,PRDX1,PCBD1,PCK2,SNCA,TAT,PRDX4,MTHFS,MOXD1,NAGK,IL4I1
6_Member	GO Biological Processes	GO:0017001	antibiotic catabolic process	-3.32664	-1.95585	15/58	217,3039,3040,3042,3046,3047,3048,3049,3050,4353,5052,5106,6622,10549,55577	ALDH2,HBA1,HBA2,HBM,HBE1,HBG1,HBG2,HBQ1,HBZ,MPO,PRDX1,PCK2,SNCA,PRDX4,NAGK
6_Member	GO Biological Processes	GO:0042743	hydrogen peroxide metabolic process	-2.98469	-1.70169	14/56	2534,3039,3040,3042,3046,3047,3048,3049,3050,4129,4353,5052,6622,10549	FYN,HBA1,HBA2,HBM,HBE1,HBG1,HBG2,HBQ1,HBZ,MAOB,MPO,PRDX1,SNCA,PRDX4
7_Summary	GO Biological Processes	GO:1905114	cell surface receptor signaling pathway involved in cell-cell signaling	-15.494	-12.1765	129/614	154,163,348,409,527,784,865,869,1001,1020,1136,1140,1142,1363,1460,1501,2011,2116,2239,2262,2348,2535,2735,2737,2742,2775,2870,2887,2889,2895,2898,2905,3487,3728,4088,4192,4343,4355,4693,4772,4851,4923,4929,4988,5026,5300,5330,5563,5649,5689,5690,5691,5695,5714,5720,5721,5800,6423,6543,6591,6608,6659,6662,6804,7041,7415,7476,7477,7480,8001,8321,8325,8326,8613,8945,8973,10082,10459,10979,22881,229…	ADRB2,AP2B1,APOE,ARRB2,ATP6V0C,CACNB3,CBFB,CBLN1,CDH3,CDK5,CHRNA3,CHRNB1,CHRNB3,CPE,CSNK2B,CTNND2,MARK2,ETV2,GPC4,GPC5,FOLR1,FZD2,GLI1,GLI3,GLRA2,GNAO1,GRK6,GRB10,RAPGEF1,GRID2,GRIK2,GRIN2C,IGFBP4,JUP,SMAD3,MDK,MOV10,MPP2,NDP,NFATC1,NOTCH1,NTSR1,NR4A2,OPRM1,P2RX5,PIN1,PLCB2,PRKAA2,RELN,PSMB1,PSMB2,PSMB3,PSMB7,PSMD8,PSME1,PSME2,PTPRO,SFRP2,SLC8A2,SNAI2,SMO,SOX4,SOX9,STX1A,TGFB1I1,VCP,WNT7A,WNT7B,W…
7_Member	GO Biological Processes	GO:1905114	cell surface receptor signaling pathway involved in cell-cell signaling	-15.494	-12.1765	129/614	154,163,348,409,527,784,865,869,1001,1020,1136,1140,1142,1363,1460,1501,2011,2116,2239,2262,2348,2535,2735,2737,2742,2775,2870,2887,2889,2895,2898,2905,3487,3728,4088,4192,4343,4355,4693,4772,4851,4923,4929,4988,5026,5300,5330,5563,5649,5689,5690,5691,5695,5714,5720,5721,5800,6423,6543,6591,6608,6659,6662,6804,7041,7415,7476,7477,7480,8001,8321,8325,8326,8613,8945,8973,10082,10459,10979,22881,229…	ADRB2,AP2B1,APOE,ARRB2,ATP6V0C,CACNB3,CBFB,CBLN1,CDH3,CDK5,CHRNA3,CHRNB1,CHRNB3,CPE,CSNK2B,CTNND2,MARK2,ETV2,GPC4,GPC5,FOLR1,FZD2,GLI1,GLI3,GLRA2,GNAO1,GRK6,GRB10,RAPGEF1,GRID2,GRIK2,GRIN2C,IGFBP4,JUP,SMAD3,MDK,MOV10,MPP2,NDP,NFATC1,NOTCH1,NTSR1,NR4A2,OPRM1,P2RX5,PIN1,PLCB2,PRKAA2,RELN,PSMB1,PSMB2,PSMB3,PSMB7,PSMD8,PSME1,PSME2,PTPRO,SFRP2,SLC8A2,SNAI2,SMO,SOX4,SOX9,STX1A,TGFB1I1,VCP,WNT7A,WNT7B,W…
7_Member	GO Biological Processes	GO:0198738	cell-cell signaling by wnt	-10.411	-7.7764	101/515	163,348,409,527,865,1001,1363,1460,1501,2011,2116,2239,2262,2348,2535,2735,2737,2775,2870,2887,2889,3487,3728,4088,4192,4343,4693,4772,4851,4929,4988,5300,5330,5563,5689,5690,5691,5695,5714,5720,5721,5800,6423,6591,6659,6662,7041,7415,7476,7477,7480,8321,8325,8326,8613,8945,10082,10459,10979,22881,23043,23184,23213,25930,25937,25987,27122,29117,29969,51339,51473,51527,51699,54331,54361,54475,5561…	AP2B1,APOE,ARRB2,ATP6V0C,CBFB,CDH3,CPE,CSNK2B,CTNND2,MARK2,ETV2,GPC4,GPC5,FOLR1,FZD2,GLI1,GLI3,GNAO1,GRK6,GRB10,RAPGEF1,IGFBP4,JUP,SMAD3,MDK,MOV10,NDP,NFATC1,NOTCH1,NR4A2,OPRM1,PIN1,PLCB2,PRKAA2,PSMB1,PSMB2,PSMB3,PSMB7,PSMD8,PSME1,PSME2,PTPRO,SFRP2,SNAI2,SOX4,SOX9,TGFB1I1,VCP,WNT7A,WNT7B,WNT10B,FZD1,FZD8,FZD9,PLPP3,BTRC,GPC6,MAD2L2,FERMT2,ANKRD6,TNIK,MESD,SULF1,PTPN23,WWTR1,TSKU,DKK3,BRD7,MDFIC,D…
7_Member	GO Biological Processes	GO:0016055	Wnt signaling pathway	-9.81223	-7.30459	99/513	163,348,409,527,865,1001,1363,1460,1501,2011,2116,2239,2262,2348,2535,2735,2737,2775,2870,2887,2889,3487,3728,4088,4192,4343,4693,4772,4851,4929,5300,5330,5563,5689,5690,5691,5695,5714,5720,5721,5800,6423,6591,6659,6662,7041,7415,7476,7477,7480,8321,8325,8326,8613,8945,10082,10459,10979,22881,23043,23184,23213,25937,25987,27122,29117,29969,51339,51473,51527,51699,54331,54361,54475,55612,55737,558…	AP2B1,APOE,ARRB2,ATP6V0C,CBFB,CDH3,CPE,CSNK2B,CTNND2,MARK2,ETV2,GPC4,GPC5,FOLR1,FZD2,GLI1,GLI3,GNAO1,GRK6,GRB10,RAPGEF1,IGFBP4,JUP,SMAD3,MDK,MOV10,NDP,NFATC1,NOTCH1,NR4A2,PIN1,PLCB2,PRKAA2,PSMB1,PSMB2,PSMB3,PSMB7,PSMD8,PSME1,PSME2,PTPRO,SFRP2,SNAI2,SOX4,SOX9,TGFB1I1,VCP,WNT7A,WNT7B,WNT10B,FZD1,FZD8,FZD9,PLPP3,BTRC,GPC6,MAD2L2,FERMT2,ANKRD6,TNIK,MESD,SULF1,WWTR1,TSKU,DKK3,BRD7,MDFIC,DACT1,DCDC2,GS…
7_Member	GO Biological Processes	GO:0060070	canonical Wnt signaling pathway	-5.534	-3.70209	61/333	348,1001,1501,2262,2348,2535,2735,2737,2889,3487,3728,4088,4192,4851,4929,5300,5689,5690,5691,5695,5714,5720,5721,5800,6423,6591,6659,6662,7415,7476,7477,7480,8321,8325,8326,8613,8945,10459,22881,25937,27122,51339,51527,54361,54475,55612,55897,55959,57664,59349,63923,79971,83439,84133,84870,90780,130612,147699,147906,283149,374946	APOE,CDH3,CTNND2,GPC5,FOLR1,FZD2,GLI1,GLI3,RAPGEF1,IGFBP4,JUP,SMAD3,MDK,NOTCH1,NR4A2,PIN1,PSMB1,PSMB2,PSMB3,PSMB7,PSMD8,PSME1,PSME2,PTPRO,SFRP2,SNAI2,SOX4,SOX9,VCP,WNT7A,WNT7B,WNT10B,FZD1,FZD8,FZD9,PLPP3,BTRC,MAD2L2,ANKRD6,WWTR1,DKK3,DACT1,GSKIP,WNT4,NLE1,FERMT1,MESP1,SULF2,PLEKHA4,KLHL12,TNN,WLS,TCF7L1,ZNRF3,RSPO3,PYGO2,TMEM198,PPM1N,DACT3,BCL9L,DRAXIN
7_Member	GO Biological Processes	GO:0030111	regulation of Wnt signaling pathway	-5.38151	-3.57405	65/366	348,527,865,1001,1501,2262,2348,2735,2737,2887,2889,3487,3728,4088,4192,4772,4851,5300,5689,5690,5691,5695,5714,5720,5721,5800,6423,6591,6659,6662,7415,7480,8326,8613,8945,10459,22881,23213,25937,25987,27122,29969,51339,51473,51527,54475,55612,55897,55959,57664,59349,63923,64359,79971,80319,83439,84133,84870,130612,147495,147699,147906,245973,343637,374946	APOE,ATP6V0C,CBFB,CDH3,CTNND2,GPC5,FOLR1,GLI1,GLI3,GRB10,RAPGEF1,IGFBP4,JUP,SMAD3,MDK,NFATC1,NOTCH1,PIN1,PSMB1,PSMB2,PSMB3,PSMB7,PSMD8,PSME1,PSME2,PTPRO,SFRP2,SNAI2,SOX4,SOX9,VCP,WNT10B,FZD9,PLPP3,BTRC,MAD2L2,ANKRD6,SULF1,WWTR1,TSKU,DKK3,MDFIC,DACT1,DCDC2,GSKIP,NLE1,FERMT1,MESP1,SULF2,PLEKHA4,KLHL12,TNN,NXN,WLS,CXXC4,TCF7L1,ZNRF3,RSPO3,TMEM198,APCDD1,PPM1N,DACT3,ATP6V1C2,RSPO4,DRAXIN
7_Member	GO Biological Processes	GO:0060828	regulation of canonical Wnt signaling pathway	-4.07776	-2.52774	50/287	348,1001,1501,2262,2348,2735,2737,2889,3487,3728,4088,4192,4851,5300,5689,5690,5691,5695,5714,5720,5721,5800,6423,6591,6659,6662,7415,7480,8326,8945,10459,22881,25937,27122,51339,51527,54475,55612,55897,55959,57664,59349,63923,79971,84133,84870,130612,147699,147906,374946	APOE,CDH3,CTNND2,GPC5,FOLR1,GLI1,GLI3,RAPGEF1,IGFBP4,JUP,SMAD3,MDK,NOTCH1,PIN1,PSMB1,PSMB2,PSMB3,PSMB7,PSMD8,PSME1,PSME2,PTPRO,SFRP2,SNAI2,SOX4,SOX9,VCP,WNT10B,FZD9,BTRC,MAD2L2,ANKRD6,WWTR1,DKK3,DACT1,GSKIP,NLE1,FERMT1,MESP1,SULF2,PLEKHA4,KLHL12,TNN,WLS,ZNRF3,RSPO3,TMEM198,PPM1N,DACT3,DRAXIN
7_Member	GO Biological Processes	GO:0001738	morphogenesis of a polarized epithelium	-3.94312	-2.42032	30/146	71,163,409,2239,2295,2535,4478,4983,5689,5690,5691,5695,5714,5720,5721,6423,7430,7476,8321,9948,10082,22881,27152,51339,57216,57664,84133,84870,89958,128272	ACTG1,AP2B1,ARRB2,GPC4,FOXF2,FZD2,MSN,OPHN1,PSMB1,PSMB2,PSMB3,PSMB7,PSMD8,PSME1,PSME2,SFRP2,EZR,WNT7A,FZD1,WDR1,GPC6,ANKRD6,INTU,DACT1,VANGL2,PLEKHA4,ZNRF3,RSPO3,SAPCD2,ARHGEF19
7_Member	GO Biological Processes	GO:0001736	establishment of planar polarity	-3.70643	-2.24625	26/123	163,409,2239,2295,2535,5689,5690,5691,5695,5714,5720,5721,6423,7476,8321,9948,10082,22881,27152,51339,57216,57664,84133,84870,89958,128272	AP2B1,ARRB2,GPC4,FOXF2,FZD2,PSMB1,PSMB2,PSMB3,PSMB7,PSMD8,PSME1,PSME2,SFRP2,WNT7A,FZD1,WDR1,GPC6,ANKRD6,INTU,DACT1,VANGL2,PLEKHA4,ZNRF3,RSPO3,SAPCD2,ARHGEF19
7_Member	GO Biological Processes	GO:0007164	establishment of tissue polarity	-3.70643	-2.24625	26/123	163,409,2239,2295,2535,5689,5690,5691,5695,5714,5720,5721,6423,7476,8321,9948,10082,22881,27152,51339,57216,57664,84133,84870,89958,128272	AP2B1,ARRB2,GPC4,FOXF2,FZD2,PSMB1,PSMB2,PSMB3,PSMB7,PSMD8,PSME1,PSME2,SFRP2,WNT7A,FZD1,WDR1,GPC6,ANKRD6,INTU,DACT1,VANGL2,PLEKHA4,ZNRF3,RSPO3,SAPCD2,ARHGEF19
7_Member	GO Biological Processes	GO:0035567	non-canonical Wnt signaling pathway	-3.56733	-2.14057	30/153	163,409,2239,2535,2775,4343,4772,5330,5689,5690,5691,5695,5714,5720,5721,6423,7476,8321,8325,8326,10082,22881,51339,54331,54361,57216,57664,84133,84870,128272	AP2B1,ARRB2,GPC4,FZD2,GNAO1,MOV10,NFATC1,PLCB2,PSMB1,PSMB2,PSMB3,PSMB7,PSMD8,PSME1,PSME2,SFRP2,WNT7A,FZD1,FZD8,FZD9,GPC6,ANKRD6,DACT1,GNG2,WNT4,VANGL2,PLEKHA4,ZNRF3,RSPO3,ARHGEF19
7_Member	GO Biological Processes	GO:2000027	regulation of animal organ morphogenesis	-3.49348	-2.08249	42/242	163,409,1906,2239,2535,2735,3280,4192,4487,4851,5689,5690,5691,5695,5714,5720,5721,5764,6091,6092,6423,6608,6662,7068,7476,8321,10082,10252,10409,22881,23213,51339,54361,55679,55897,55959,57216,57664,84133,84870,89958,128272	AP2B1,ARRB2,EDN1,GPC4,FZD2,GLI1,HES1,MDK,MSX1,NOTCH1,PSMB1,PSMB2,PSMB3,PSMB7,PSMD8,PSME1,PSME2,PTN,ROBO1,ROBO2,SFRP2,SMO,SOX9,THRB,WNT7A,FZD1,GPC6,SPRY1,BASP1,ANKRD6,SULF1,DACT1,WNT4,LIMS2,MESP1,SULF2,VANGL2,PLEKHA4,ZNRF3,RSPO3,SAPCD2,ARHGEF19
7_Member	GO Biological Processes	GO:1905330	regulation of morphogenesis of an epithelium	-3.21504	-1.87108	33/182	163,409,2239,2247,2535,2697,4192,5293,5689,5690,5691,5695,5714,5720,5721,6423,6608,6662,7476,8321,10082,10979,22881,23213,51339,54361,55612,57216,57664,84133,84870,89958,128272	AP2B1,ARRB2,GPC4,FGF2,FZD2,GJA1,MDK,PIK3CD,PSMB1,PSMB2,PSMB3,PSMB7,PSMD8,PSME1,PSME2,SFRP2,SMO,SOX9,WNT7A,FZD1,GPC6,FERMT2,ANKRD6,SULF1,DACT1,WNT4,FERMT1,VANGL2,PLEKHA4,ZNRF3,RSPO3,SAPCD2,ARHGEF19
7_Member	Reactome Gene Sets	R-HSA-3858494	Beta-catenin independent WNT signaling	-3.21046	-1.86733	28/146	163,409,808,1212,2535,2775,2783,2786,4343,4772,5330,5582,5592,5689,5690,5691,5695,5714,5720,5721,8321,8325,54331,54361,55970,57216,59345,83439	AP2B1,ARRB2,CALM3,CLTB,FZD2,GNAO1,GNB2,GNG4,MOV10,NFATC1,PLCB2,PRKCG,PRKG1,PSMB1,PSMB2,PSMB3,PSMB7,PSMD8,PSME1,PSME2,FZD1,FZD8,GNG2,WNT4,GNG12,VANGL2,GNB4,TCF7L1
7_Member	GO Biological Processes	GO:0090175	regulation of establishment of planar polarity	-3.16397	-1.82955	23/112	163,409,2239,2535,5689,5690,5691,5695,5714,5720,5721,6423,7476,8321,10082,22881,51339,57216,57664,84133,84870,89958,128272	AP2B1,ARRB2,GPC4,FZD2,PSMB1,PSMB2,PSMB3,PSMB7,PSMD8,PSME1,PSME2,SFRP2,WNT7A,FZD1,GPC6,ANKRD6,DACT1,VANGL2,PLEKHA4,ZNRF3,RSPO3,SAPCD2,ARHGEF19
7_Member	Reactome Gene Sets	R-HSA-195721	Signaling by WNT	-3.06041	-1.74917	52/332	163,409,808,1212,1460,1488,2535,2775,2783,2786,4343,4772,5330,5525,5582,5592,5689,5690,5691,5695,5714,5720,5721,6423,6659,6662,7476,7477,7480,7534,8321,8325,8945,9070,51339,51699,54331,54361,55553,55737,55970,57216,59345,59349,79971,83439,84133,84870,85236,90780,283149,343637	AP2B1,ARRB2,CALM3,CLTB,CSNK2B,CTBP2,FZD2,GNAO1,GNB2,GNG4,MOV10,NFATC1,PLCB2,PPP2R5A,PRKCG,PRKG1,PSMB1,PSMB2,PSMB3,PSMB7,PSMD8,PSME1,PSME2,SFRP2,SOX4,SOX9,WNT7A,WNT7B,WNT10B,YWHAZ,FZD1,FZD8,BTRC,ASH2L,DACT1,VPS29,GNG2,WNT4,SOX6,VPS35,GNG12,VANGL2,GNB4,KLHL12,WLS,TCF7L1,ZNRF3,RSPO3,H2BC12,PYGO2,BCL9L,RSPO4
7_Member	GO Biological Processes	GO:0060071	Wnt signaling pathway, planar cell polarity pathway	-3.00342	-1.70871	22/108	163,409,2239,2535,5689,5690,5691,5695,5714,5720,5721,6423,7476,8321,10082,22881,51339,57216,57664,84133,84870,128272	AP2B1,ARRB2,GPC4,FZD2,PSMB1,PSMB2,PSMB3,PSMB7,PSMD8,PSME1,PSME2,SFRP2,WNT7A,FZD1,GPC6,ANKRD6,DACT1,VANGL2,PLEKHA4,ZNRF3,RSPO3,ARHGEF19
7_Member	GO Biological Processes	GO:0030178	negative regulation of Wnt signaling pathway	-2.87227	-1.61438	36/213	348,2735,2737,2887,2889,3487,4192,4772,4851,5689,5690,5691,5695,5714,5720,5721,5800,6423,6591,6662,10459,22881,25937,25987,27122,51339,55612,55897,59349,63923,64359,80319,84133,147495,147906,374946	APOE,GLI1,GLI3,GRB10,RAPGEF1,IGFBP4,MDK,NFATC1,NOTCH1,PSMB1,PSMB2,PSMB3,PSMB7,PSMD8,PSME1,PSME2,PTPRO,SFRP2,SNAI2,SOX9,MAD2L2,ANKRD6,WWTR1,TSKU,DKK3,DACT1,FERMT1,MESP1,KLHL12,TNN,NXN,CXXC4,ZNRF3,APCDD1,DACT3,DRAXIN
7_Member	GO Biological Processes	GO:0030177	positive regulation of Wnt signaling pathway	-2.72551	-1.4979	31/179	527,1001,2262,3728,4088,5300,5689,5690,5691,5695,5714,5720,5721,6423,6659,7415,7480,8326,22881,23213,51339,51527,54475,55959,57664,79971,84870,130612,147699,245973,343637	ATP6V0C,CDH3,GPC5,JUP,SMAD3,PIN1,PSMB1,PSMB2,PSMB3,PSMB7,PSMD8,PSME1,PSME2,SFRP2,SOX4,VCP,WNT10B,FZD9,ANKRD6,SULF1,DACT1,GSKIP,NLE1,SULF2,PLEKHA4,WLS,RSPO3,TMEM198,PPM1N,ATP6V1C2,RSPO4
7_Member	GO Biological Processes	GO:0090263	positive regulation of canonical Wnt signaling pathway	-2.50723	-1.33782	26/147	1001,2262,3728,4088,5300,5689,5690,5691,5695,5714,5720,5721,6423,6659,7415,7480,8326,51339,51527,54475,55959,57664,79971,84870,130612,147699	CDH3,GPC5,JUP,SMAD3,PIN1,PSMB1,PSMB2,PSMB3,PSMB7,PSMD8,PSME1,PSME2,SFRP2,SOX4,VCP,WNT10B,FZD9,DACT1,GSKIP,NLE1,SULF2,PLEKHA4,WLS,RSPO3,TMEM198,PPM1N
7_Member	GO Biological Processes	GO:0090090	negative regulation of canonical Wnt signaling pathway	-2.43773	-1.28968	30/179	348,2735,2737,2889,3487,4192,4851,5689,5690,5691,5695,5714,5720,5721,5800,6423,6591,6662,10459,22881,25937,27122,51339,55612,55897,59349,63923,84133,147906,374946	APOE,GLI1,GLI3,RAPGEF1,IGFBP4,MDK,NOTCH1,PSMB1,PSMB2,PSMB3,PSMB7,PSMD8,PSME1,PSME2,PTPRO,SFRP2,SNAI2,SOX9,MAD2L2,ANKRD6,WWTR1,DKK3,DACT1,FERMT1,MESP1,KLHL12,TNN,ZNRF3,DACT3,DRAXIN
8_Summary	Reactome Gene Sets	R-HSA-9675108	Nervous system development	-14.958	-11.6783	122/576	71,163,389,779,784,1020,1212,1284,1297,1400,1460,1463,1796,1809,1947,1948,1981,2044,2064,2534,2596,2817,2887,3156,3265,3785,3786,3897,3912,4067,4478,4637,4651,4753,5293,5296,5361,5594,5595,5598,5600,5603,5649,5689,5690,5691,5695,5714,5720,5721,5786,5788,5909,6091,6092,6136,6137,6154,6155,6157,6158,6159,6181,6191,6203,6204,6208,6222,6326,6328,6332,6335,6464,6585,6586,6711,6712,6923,7003,7277,7280,…	ACTG1,AP2B1,RHOC,CACNA1S,CACNB3,CDK5,CLTB,COL4A2,COL9A1,CRMP1,CSNK2B,NCAN,DOK1,DPYSL3,EFNB1,EFNB2,EIF4G1,EPHA5,ERBB2,FYN,GAP43,GPC1,GRB10,HMGCR,HRAS,KCNQ2,KCNQ3,L1CAM,LAMB1,LYN,MSN,MYL6,MYO10,NELL2,PIK3CD,PIK3R2,PLXNA1,MAPK1,MAPK3,MAPK7,MAPK11,MAPK13,RELN,PSMB1,PSMB2,PSMB3,PSMB7,PSMD8,PSME1,PSME2,PTPRA,PTPRC,RAP1GAP,ROBO1,ROBO2,RPL12,RPL13,RPL26,RPL27,RPL27A,RPL28,RPL29,RPLP2,RPS4X,RPS9,RPS10,RPS…
8_Member	Reactome Gene Sets	R-HSA-9675108	Nervous system development	-14.958	-11.6783	122/576	71,163,389,779,784,1020,1212,1284,1297,1400,1460,1463,1796,1809,1947,1948,1981,2044,2064,2534,2596,2817,2887,3156,3265,3785,3786,3897,3912,4067,4478,4637,4651,4753,5293,5296,5361,5594,5595,5598,5600,5603,5649,5689,5690,5691,5695,5714,5720,5721,5786,5788,5909,6091,6092,6136,6137,6154,6155,6157,6158,6159,6181,6191,6203,6204,6208,6222,6326,6328,6332,6335,6464,6585,6586,6711,6712,6923,7003,7277,7280,…	ACTG1,AP2B1,RHOC,CACNA1S,CACNB3,CDK5,CLTB,COL4A2,COL9A1,CRMP1,CSNK2B,NCAN,DOK1,DPYSL3,EFNB1,EFNB2,EIF4G1,EPHA5,ERBB2,FYN,GAP43,GPC1,GRB10,HMGCR,HRAS,KCNQ2,KCNQ3,L1CAM,LAMB1,LYN,MSN,MYL6,MYO10,NELL2,PIK3CD,PIK3R2,PLXNA1,MAPK1,MAPK3,MAPK7,MAPK11,MAPK13,RELN,PSMB1,PSMB2,PSMB3,PSMB7,PSMD8,PSME1,PSME2,PTPRA,PTPRC,RAP1GAP,ROBO1,ROBO2,RPL12,RPL13,RPL26,RPL27,RPL27A,RPL28,RPL29,RPLP2,RPS4X,RPS9,RPS10,RPS…
8_Member	Reactome Gene Sets	R-HSA-422475	Axon guidance	-14.4516	-11.3148	117/551	71,163,389,779,784,1020,1212,1284,1297,1400,1460,1463,1796,1809,1947,1948,1981,2044,2064,2534,2596,2817,2887,3265,3785,3786,3897,3912,4067,4478,4637,4651,4753,5293,5296,5361,5594,5595,5598,5600,5603,5649,5689,5690,5691,5695,5714,5720,5721,5786,5788,5909,6091,6092,6136,6137,6154,6155,6157,6158,6159,6181,6191,6203,6204,6208,6222,6326,6328,6332,6335,6464,6585,6586,6711,6712,6923,7277,7280,7430,7852,…	ACTG1,AP2B1,RHOC,CACNA1S,CACNB3,CDK5,CLTB,COL4A2,COL9A1,CRMP1,CSNK2B,NCAN,DOK1,DPYSL3,EFNB1,EFNB2,EIF4G1,EPHA5,ERBB2,FYN,GAP43,GPC1,GRB10,HRAS,KCNQ2,KCNQ3,L1CAM,LAMB1,LYN,MSN,MYL6,MYO10,NELL2,PIK3CD,PIK3R2,PLXNA1,MAPK1,MAPK3,MAPK7,MAPK11,MAPK13,RELN,PSMB1,PSMB2,PSMB3,PSMB7,PSMD8,PSME1,PSME2,PTPRA,PTPRC,RAP1GAP,ROBO1,ROBO2,RPL12,RPL13,RPL26,RPL27,RPL27A,RPL28,RPL29,RPLP2,RPS4X,RPS9,RPS10,RPS14,RPS…
8_Member	Reactome Gene Sets	R-HSA-8953897	Cellular responses to external stimuli	-6.59133	-4.57485	100/598	318,475,527,528,817,832,1017,1026,1032,1871,2887,3301,3337,3725,4343,4489,4490,4493,4494,4495,4496,4499,4501,4502,5052,5594,5595,5598,5600,5689,5690,5691,5695,5714,5720,5721,5928,5931,6118,6136,6137,6154,6155,6157,6158,6159,6181,6191,6203,6204,6208,6222,6923,7013,7277,7280,7295,7415,7531,7867,8453,8480,8655,8900,9114,9531,9973,10121,10325,10376,10383,11065,11133,11258,22809,22955,23043,23334,2582…	NUDT2,ATOX1,ATP6V0C,ATP6V1C1,CAMK2D,CAPZB,CDK2,CDKN1A,CDKN2D,E2F3,GRB10,DNAJA1,DNAJB1,JUN,MOV10,MT1A,MT1B,MT1E,MT1F,MT1G,MT1H,MT1M,MT1X,MT2A,PRDX1,MAPK1,MAPK3,MAPK7,MAPK11,PSMB1,PSMB2,PSMB3,PSMB7,PSMD8,PSME1,PSME2,RBBP4,RBBP7,RPA2,RPL12,RPL13,RPL26,RPL27,RPL27A,RPL28,RPL29,RPLP2,RPS4X,RPS9,RPS10,RPS14,RPS18,ELOB,TERF1,TUBA4A,TUBB2A,TXN,VCP,YWHAE,MAPKAPK3,CUL2,RAE1,DYNLL1,CCNA1,ATP6V0D1,BAG3,CCS,A…
8_Member	Reactome Gene Sets	R-HSA-2262752	Cellular responses to stress	-4.78102	-3.09083	91/584	318,475,527,528,817,832,1017,1026,1032,1871,2887,3301,3337,3725,4343,5052,5594,5595,5598,5600,5689,5690,5691,5695,5714,5720,5721,5928,5931,6118,6136,6137,6154,6155,6157,6158,6159,6181,6191,6203,6204,6208,6222,6923,7013,7277,7280,7295,7415,7531,7867,8453,8480,8655,8900,9114,9531,9973,10121,10325,10376,10383,11065,11133,11258,22809,22955,23043,23334,25828,27000,28956,51143,51343,51529,54386,55364,5…	NUDT2,ATOX1,ATP6V0C,ATP6V1C1,CAMK2D,CAPZB,CDK2,CDKN1A,CDKN2D,E2F3,GRB10,DNAJA1,DNAJB1,JUN,MOV10,PRDX1,MAPK1,MAPK3,MAPK7,MAPK11,PSMB1,PSMB2,PSMB3,PSMB7,PSMD8,PSME1,PSME2,RBBP4,RBBP7,RPA2,RPL12,RPL13,RPL26,RPL27,RPL27A,RPL28,RPL29,RPLP2,RPS4X,RPS9,RPS10,RPS14,RPS18,ELOB,TERF1,TUBA4A,TUBB2A,TXN,VCP,YWHAE,MAPKAPK3,CUL2,RAE1,DYNLL1,CCNA1,ATP6V0D1,BAG3,CCS,ACTR1A,RRAGB,TUBA1B,TUBB4B,UBE2C,KPTN,DCTN3,AT…
8_Member	Reactome Gene Sets	R-HSA-376176	Signaling by ROBO receptors	-2.69261	-1.4698	36/218	1981,2817,4753,5689,5690,5691,5695,5714,5720,5721,6091,6092,6136,6137,6154,6155,6157,6158,6159,6181,6191,6203,6204,6208,6222,6585,6586,6923,7852,8453,9939,10487,56924,57522,64221,116832	EIF4G1,GPC1,NELL2,PSMB1,PSMB2,PSMB3,PSMB7,PSMD8,PSME1,PSME2,ROBO1,ROBO2,RPL12,RPL13,RPL26,RPL27,RPL27A,RPL28,RPL29,RPLP2,RPS4X,RPS9,RPS10,RPS14,RPS18,SLIT1,SLIT3,ELOB,CXCR4,CUL2,RBM8A,CAP1,PAK6,SRGAP1,ROBO3,RPL39L
8_Member	Reactome Gene Sets	R-HSA-9010553	Regulation of expression of SLITs and ROBOs	-2.45124	-1.30104	29/171	1981,5689,5690,5691,5695,5714,5720,5721,6091,6092,6136,6137,6154,6155,6157,6158,6159,6181,6191,6203,6204,6208,6222,6585,6923,8453,9939,64221,116832	EIF4G1,PSMB1,PSMB2,PSMB3,PSMB7,PSMD8,PSME1,PSME2,ROBO1,ROBO2,RPL12,RPL13,RPL26,RPL27,RPL27A,RPL28,RPL29,RPLP2,RPS4X,RPS9,RPS10,RPS14,RPS18,SLIT1,ELOB,CUL2,RBM8A,ROBO3,RPL39L
9_Summary	KEGG Pathway	hsa04080	Neuroactive ligand-receptor interaction	-14.6688	-11.4238	90/373	116,136,147,154,187,624,727,799,885,887,1131,1136,1140,1142,1268,1325,1816,1906,1910,2550,2555,2556,2558,2560,2564,2565,2690,2742,2771,2846,2862,2895,2897,2898,2899,2900,2905,2911,2913,2916,2917,2922,3062,3269,3350,3358,3363,3454,4158,4161,4852,4886,4889,4923,4986,4988,5021,5026,5031,5173,5733,5734,6750,6751,6752,6866,7067,7068,7201,8001,8767,8811,8973,9340,9568,10161,10203,10457,10886,22953,2362…	ADCYAP1,ADORA2B,ADRA1B,ADRB2,APLNR,BDKRB2,C5,CALCR,CCK,CCKBR,CHRM3,CHRNA3,CHRNB1,CHRNB3,CNR1,CORT,DRD5,EDN1,EDNRB,GABBR1,GABRA2,GABRA3,GABRA5,GABRB1,GABRE,GABRG1,GHR,GLRA2,GNAI2,LPAR4,MLNR,GRID2,GRIK1,GRIK2,GRIK3,GRIK4,GRIN2C,GRM1,GRM3,GRM6,GRM7,GRP,HCRTR2,HRH1,HTR1A,HTR2C,HTR7,IFNAR1,MC2R,MC5R,NPY,NPY1R,NPY5R,NTSR1,OPRK1,OPRM1,OXTR,P2RX5,P2RY6,PDYN,PTGER3,PTGER4,SST,SSTR1,SSTR2,TAC3,THRA,THRB,TR…
9_Member	KEGG Pathway	hsa04080	Neuroactive ligand-receptor interaction	-14.6688	-11.4238	90/373	116,136,147,154,187,624,727,799,885,887,1131,1136,1140,1142,1268,1325,1816,1906,1910,2550,2555,2556,2558,2560,2564,2565,2690,2742,2771,2846,2862,2895,2897,2898,2899,2900,2905,2911,2913,2916,2917,2922,3062,3269,3350,3358,3363,3454,4158,4161,4852,4886,4889,4923,4986,4988,5021,5026,5031,5173,5733,5734,6750,6751,6752,6866,7067,7068,7201,8001,8767,8811,8973,9340,9568,10161,10203,10457,10886,22953,2362…	ADCYAP1,ADORA2B,ADRA1B,ADRB2,APLNR,BDKRB2,C5,CALCR,CCK,CCKBR,CHRM3,CHRNA3,CHRNB1,CHRNB3,CNR1,CORT,DRD5,EDN1,EDNRB,GABBR1,GABRA2,GABRA3,GABRA5,GABRB1,GABRE,GABRG1,GHR,GLRA2,GNAI2,LPAR4,MLNR,GRID2,GRIK1,GRIK2,GRIK3,GRIK4,GRIN2C,GRM1,GRM3,GRM6,GRM7,GRP,HCRTR2,HRH1,HTR1A,HTR2C,HTR7,IFNAR1,MC2R,MC5R,NPY,NPY1R,NPY5R,NTSR1,OPRK1,OPRM1,OXTR,P2RX5,P2RY6,PDYN,PTGER3,PTGER4,SST,SSTR1,SSTR2,TAC3,THRA,THRB,TR…
9_Member	KEGG Pathway	ko04080	Neuroactive ligand-receptor interaction	-12.5958	-9.70463	70/277	136,147,154,187,624,799,887,1131,1136,1140,1142,1268,1816,1910,2550,2555,2556,2558,2560,2564,2565,2690,2742,2846,2862,2895,2897,2898,2899,2900,2905,2911,2913,2916,2917,3062,3269,3350,3358,3363,4158,4161,4886,4889,4923,4986,4988,5021,5026,5031,5733,5734,6751,6752,7067,7068,7201,8001,8811,8973,9340,9568,10161,10203,10886,22953,23620,53829,55879,116443	ADORA2B,ADRA1B,ADRB2,APLNR,BDKRB2,CALCR,CCKBR,CHRM3,CHRNA3,CHRNB1,CHRNB3,CNR1,DRD5,EDNRB,GABBR1,GABRA2,GABRA3,GABRA5,GABRB1,GABRE,GABRG1,GHR,GLRA2,LPAR4,MLNR,GRID2,GRIK1,GRIK2,GRIK3,GRIK4,GRIN2C,GRM1,GRM3,GRM6,GRM7,HCRTR2,HRH1,HTR1A,HTR2C,HTR7,MC2R,MC5R,NPY1R,NPY5R,NTSR1,OPRK1,OPRM1,OXTR,P2RX5,P2RY6,PTGER3,PTGER4,SSTR1,SSTR2,THRA,THRB,TRHR,GLRA3,GALR2,CHRNA6,GLP2R,GABBR2,LPAR6,CALCRL,NPFFR2,P2RX2…
9_Member	Reactome Gene Sets	R-HSA-500792	GPCR ligand binding	-8.95133	-6.54667	90/467	116,136,147,154,187,624,727,799,885,887,1131,1230,1268,1325,1393,1816,1906,1910,2535,2550,2783,2786,2840,2846,2862,2911,2913,2916,2917,2921,2922,3062,3269,3350,3358,3363,3549,4158,4161,4852,4886,4889,4923,4935,4986,4988,5021,5031,5173,5196,5368,5727,5733,5734,5744,6608,6750,6751,6752,6866,7201,7476,7477,7480,7852,8111,8321,8325,8326,8643,8811,9340,9568,10161,10203,10886,23620,50865,53829,54331,54…	ADCYAP1,ADORA2B,ADRA1B,ADRB2,APLNR,BDKRB2,C5,CALCR,CCK,CCKBR,CHRM3,CCR1,CNR1,CORT,CRHBP,DRD5,EDN1,EDNRB,FZD2,GABBR1,GNB2,GNG4,GPR17,LPAR4,MLNR,GRM1,GRM3,GRM6,GRM7,CXCL3,GRP,HCRTR2,HRH1,HTR1A,HTR2C,HTR7,IHH,MC2R,MC5R,NPY,NPY1R,NPY5R,NTSR1,GPR143,OPRK1,OPRM1,OXTR,P2RY6,PDYN,PF4,PNOC,PTCH1,PTGER3,PTGER4,PTHLH,SMO,SST,SSTR1,SSTR2,TAC3,TRHR,WNT7A,WNT7B,WNT10B,CXCR4,GPR68,FZD1,FZD8,FZD9,PTCH2,GALR2,GLP…
9_Member	GO Biological Processes	GO:0007218	neuropeptide signaling pathway	-6.95995	-4.88884	30/106	116,1363,2742,2922,3062,4158,4852,4878,4886,4889,4923,4935,4986,4988,5173,5368,6751,6752,6866,7301,8001,8811,9607,10178,10886,23620,27297,57537,128674,256933	ADCYAP1,CPE,GLRA2,GRP,HCRTR2,MC2R,NPY,NPPA,NPY1R,NPY5R,NTSR1,GPR143,OPRK1,OPRM1,PDYN,PNOC,SSTR1,SSTR2,TAC3,TYRO3,GLRA3,GALR2,CARTPT,TENM1,NPFFR2,NTSR2,CRCP,SORCS2,PROKR2,NPB
9_Member	Reactome Gene Sets	R-HSA-373076	Class A/1 (Rhodopsin-like receptors)	-5.44735	-3.63002	61/335	136,147,154,187,624,727,885,887,1131,1230,1268,1325,1816,1906,1910,2840,2846,2862,2921,2922,3062,3269,3350,3358,3363,4158,4161,4852,4886,4889,4923,4935,4986,4988,5021,5031,5173,5196,5368,5733,5734,6750,6751,6752,6866,7201,7852,8111,8811,10161,10886,23620,50865,53829,56477,57007,64805,128674,256933,257313,338557	ADORA2B,ADRA1B,ADRB2,APLNR,BDKRB2,C5,CCK,CCKBR,CHRM3,CCR1,CNR1,CORT,DRD5,EDN1,EDNRB,GPR17,LPAR4,MLNR,CXCL3,GRP,HCRTR2,HRH1,HTR1A,HTR2C,HTR7,MC2R,MC5R,NPY,NPY1R,NPY5R,NTSR1,GPR143,OPRK1,OPRM1,OXTR,P2RY6,PDYN,PF4,PNOC,PTGER3,PTGER4,SST,SSTR1,SSTR2,TAC3,TRHR,CXCR4,GPR68,GALR2,LPAR6,NPFFR2,NTSR2,HEBP1,P2RY13,CCL28,ACKR3,P2RY12,PROKR2,NPB,UTS2B,FFAR4
9_Member	Reactome Gene Sets	R-HSA-416476	G alpha (q) signalling events	-5.00021	-3.2604	43/216	147,624,885,887,1131,1606,1607,1906,1910,2783,2786,2840,2846,2862,2911,2922,3062,3265,3269,3358,4923,4935,5021,5031,5296,5330,5580,5594,5595,5598,6866,7201,8111,10161,10886,23620,54331,55970,59345,64407,128674,257313,338557	ADRA1B,BDKRB2,CCK,CCKBR,CHRM3,DGKA,DGKB,EDN1,EDNRB,GNB2,GNG4,GPR17,LPAR4,MLNR,GRM1,GRP,HCRTR2,HRAS,HRH1,HTR2C,NTSR1,GPR143,OXTR,P2RY6,PIK3R2,PLCB2,PRKCD,MAPK1,MAPK3,MAPK7,TAC3,TRHR,GPR68,LPAR6,NPFFR2,NTSR2,GNG2,GNG12,GNB4,RGS18,PROKR2,UTS2B,FFAR4
9_Member	Reactome Gene Sets	R-HSA-375276	Peptide ligand-binding receptors	-4.69492	-3.01906	40/201	187,624,727,885,887,1230,1325,1906,1910,2862,2921,2922,3062,4158,4161,4852,4886,4889,4923,4986,4988,5021,5173,5196,5368,6750,6751,6752,6866,7201,7852,8811,10886,23620,50865,56477,57007,128674,256933,257313	APLNR,BDKRB2,C5,CCK,CCKBR,CCR1,CORT,EDN1,EDNRB,MLNR,CXCL3,GRP,HCRTR2,MC2R,MC5R,NPY,NPY1R,NPY5R,NTSR1,OPRK1,OPRM1,OXTR,PDYN,PF4,PNOC,SST,SSTR1,SSTR2,TAC3,TRHR,CXCR4,GALR2,NPFFR2,NTSR2,HEBP1,CCL28,ACKR3,PROKR2,NPB,UTS2B
9_Member	WikiPathways	WP24	Peptide GPCRs	-4.44482	-2.82072	20/75	624,887,1230,1910,3062,4158,4161,4886,4889,4923,4986,4988,5021,6751,6752,7201,7852,8811,10396,23620	BDKRB2,CCKBR,CCR1,EDNRB,HCRTR2,MC2R,MC5R,NPY1R,NPY5R,NTSR1,OPRK1,OPRM1,OXTR,SSTR1,SSTR2,TRHR,CXCR4,GALR2,ATP8A1,NTSR2
9_Member	WikiPathways	WP455	GPCRs, Class A Rhodopsin-like	-4.00612	-2.47408	46/259	136,147,154,187,624,887,1131,1230,1268,1816,1910,2830,2840,2846,2848,2862,3062,3269,3350,3358,3363,4158,4161,4886,4889,4923,4986,4988,5021,5031,5733,5734,6751,6752,7201,7852,8111,8811,10161,10886,23620,23637,26539,53829,57007,64805	ADORA2B,ADRA1B,ADRB2,APLNR,BDKRB2,CCKBR,CHRM3,CCR1,CNR1,DRD5,EDNRB,GPR6,GPR17,LPAR4,GPR25,MLNR,HCRTR2,HRH1,HTR1A,HTR2C,HTR7,MC2R,MC5R,NPY1R,NPY5R,NTSR1,OPRK1,OPRM1,OXTR,P2RY6,PTGER3,PTGER4,SSTR1,SSTR2,TRHR,CXCR4,GPR68,GALR2,LPAR6,NPFFR2,NTSR2,RABGAP1,OR10H1,P2RY13,ACKR3,P2RY12
9_Member	GO Biological Processes	GO:0007200	phospholipase C-activating G protein-coupled receptor signaling pathway	-3.29562	-1.93147	22/103	147,887,1816,1906,1910,2840,2846,2911,2922,3062,3269,3358,4986,4988,5031,5733,7201,8811,10161,23620,64805,338557	ADRA1B,CCKBR,DRD5,EDN1,EDNRB,GPR17,LPAR4,GRM1,GRP,HCRTR2,HRH1,HTR2C,OPRK1,OPRM1,P2RY6,PTGER3,TRHR,GALR2,LPAR6,NTSR2,P2RY12,FFAR4
10_Summary	GO Biological Processes	GO:0032990	cell part morphogenesis	-14.5508	-11.338	136/679	348,393,396,399,547,575,577,627,658,885,1002,1009,1020,1136,1400,1501,1796,1947,1948,2011,2044,2064,2290,2534,2596,2697,2737,2817,2823,2887,3730,3897,3913,3925,4192,4343,4534,4681,4851,4915,4929,4983,5293,5361,5594,5595,5598,5649,5727,5764,5786,5800,5818,5819,5909,6091,6092,6464,6585,6586,6608,6643,6711,6712,6860,7101,7337,7430,7476,7533,7852,8239,8437,8828,9253,9362,9706,9856,10154,10160,10458,1…	APOE,ARHGAP4,ARHGDIA,RHOH,KIF1A,ADGRB1,ADGRB3,BDNF,BMPR1B,CCK,CDH4,CDH11,CDK5,CHRNA3,CRMP1,CTNND2,DOK1,EFNB1,EFNB2,MARK2,EPHA5,ERBB2,FOXG1,FYN,GAP43,GJA1,GLI3,GPC1,GPM6A,GRB10,ANOS1,L1CAM,LAMB2,STMN1,MDK,MOV10,MTM1,NBL1,NOTCH1,NTRK2,NR4A2,OPHN1,PIK3CD,PLXNA1,MAPK1,MAPK3,MAPK7,RELN,PTCH1,PTN,PTPRA,PTPRO,NECTIN1,NECTIN2,RAP1GAP,ROBO1,ROBO2,SHC1,SLIT1,SLIT3,SMO,SNX2,SPTBN1,SPTBN2,SYT4,NR2E1,UBE3A,EZ…
10_Member	GO Biological Processes	GO:0032990	cell part morphogenesis	-14.5508	-11.338	136/679	348,393,396,399,547,575,577,627,658,885,1002,1009,1020,1136,1400,1501,1796,1947,1948,2011,2044,2064,2290,2534,2596,2697,2737,2817,2823,2887,3730,3897,3913,3925,4192,4343,4534,4681,4851,4915,4929,4983,5293,5361,5594,5595,5598,5649,5727,5764,5786,5800,5818,5819,5909,6091,6092,6464,6585,6586,6608,6643,6711,6712,6860,7101,7337,7430,7476,7533,7852,8239,8437,8828,9253,9362,9706,9856,10154,10160,10458,1…	APOE,ARHGAP4,ARHGDIA,RHOH,KIF1A,ADGRB1,ADGRB3,BDNF,BMPR1B,CCK,CDH4,CDH11,CDK5,CHRNA3,CRMP1,CTNND2,DOK1,EFNB1,EFNB2,MARK2,EPHA5,ERBB2,FOXG1,FYN,GAP43,GJA1,GLI3,GPC1,GPM6A,GRB10,ANOS1,L1CAM,LAMB2,STMN1,MDK,MOV10,MTM1,NBL1,NOTCH1,NTRK2,NR4A2,OPHN1,PIK3CD,PLXNA1,MAPK1,MAPK3,MAPK7,RELN,PTCH1,PTN,PTPRA,PTPRO,NECTIN1,NECTIN2,RAP1GAP,ROBO1,ROBO2,SHC1,SLIT1,SLIT3,SMO,SNX2,SPTBN1,SPTBN2,SYT4,NR2E1,UBE3A,EZ…
10_Member	GO Biological Processes	GO:0048812	neuron projection morphogenesis	-14.5194	-11.3366	131/645	348,393,396,399,547,575,577,627,658,885,1002,1009,1020,1136,1400,1501,1796,1947,1948,2011,2044,2064,2290,2534,2596,2697,2737,2817,2823,2887,3730,3897,3913,3925,4343,4681,4851,4915,4929,4983,5293,5361,5594,5595,5598,5649,5727,5764,5786,5800,5818,5909,6091,6092,6464,6585,6586,6608,6711,6712,6860,7101,7337,7430,7476,7533,7852,8239,8437,8828,9253,9362,9706,9856,10154,10160,10458,10494,10500,10501,105…	APOE,ARHGAP4,ARHGDIA,RHOH,KIF1A,ADGRB1,ADGRB3,BDNF,BMPR1B,CCK,CDH4,CDH11,CDK5,CHRNA3,CRMP1,CTNND2,DOK1,EFNB1,EFNB2,MARK2,EPHA5,ERBB2,FOXG1,FYN,GAP43,GJA1,GLI3,GPC1,GPM6A,GRB10,ANOS1,L1CAM,LAMB2,STMN1,MOV10,NBL1,NOTCH1,NTRK2,NR4A2,OPHN1,PIK3CD,PLXNA1,MAPK1,MAPK3,MAPK7,RELN,PTCH1,PTN,PTPRA,PTPRO,NECTIN1,RAP1GAP,ROBO1,ROBO2,SHC1,SLIT1,SLIT3,SMO,SPTBN1,SPTBN2,SYT4,NR2E1,UBE3A,EZR,WNT7A,YWHAH,CXCR4,US…
10_Member	GO Biological Processes	GO:0000904	cell morphogenesis involved in differentiation	-14.4433	-11.3148	142/723	87,348,393,396,399,547,575,577,627,658,885,1002,1009,1020,1136,1400,1501,1796,1947,1948,2011,2044,2064,2290,2316,2534,2596,2737,2817,2887,3280,3549,3695,3730,3897,3912,3913,3925,4192,4647,4851,4915,4929,4983,5293,5361,5594,5595,5598,5649,5727,5764,5777,5786,5800,5818,5909,6091,6092,6281,6464,6585,6586,6608,6711,6712,6904,7010,7101,7301,7337,7430,7476,7533,7852,8239,8828,9253,9706,9750,9856,9948,1…	ACTN1,APOE,ARHGAP4,ARHGDIA,RHOH,KIF1A,ADGRB1,ADGRB3,BDNF,BMPR1B,CCK,CDH4,CDH11,CDK5,CHRNA3,CRMP1,CTNND2,DOK1,EFNB1,EFNB2,MARK2,EPHA5,ERBB2,FOXG1,FLNA,FYN,GAP43,GLI3,GPC1,GRB10,HES1,IHH,ITGB7,ANOS1,L1CAM,LAMB1,LAMB2,STMN1,MDK,MYO7A,NOTCH1,NTRK2,NR4A2,OPHN1,PIK3CD,PLXNA1,MAPK1,MAPK3,MAPK7,RELN,PTCH1,PTN,PTPN6,PTPRA,PTPRO,NECTIN1,RAP1GAP,ROBO1,ROBO2,S100A10,SHC1,SLIT1,SLIT3,SMO,SPTBN1,SPTBN2,TBCD,TE…
10_Member	GO Biological Processes	GO:0048858	cell projection morphogenesis	-14.2958	-11.1922	133/663	348,393,396,399,547,575,577,627,658,885,1002,1009,1020,1136,1400,1501,1796,1947,1948,2011,2044,2064,2290,2534,2596,2697,2737,2817,2823,2887,3730,3897,3913,3925,4192,4343,4681,4851,4915,4929,4983,5293,5361,5594,5595,5598,5649,5727,5764,5786,5800,5818,5909,6091,6092,6464,6585,6586,6608,6643,6711,6712,6860,7101,7337,7430,7476,7533,7852,8239,8437,8828,9253,9362,9706,9856,10154,10160,10458,10494,10500…	APOE,ARHGAP4,ARHGDIA,RHOH,KIF1A,ADGRB1,ADGRB3,BDNF,BMPR1B,CCK,CDH4,CDH11,CDK5,CHRNA3,CRMP1,CTNND2,DOK1,EFNB1,EFNB2,MARK2,EPHA5,ERBB2,FOXG1,FYN,GAP43,GJA1,GLI3,GPC1,GPM6A,GRB10,ANOS1,L1CAM,LAMB2,STMN1,MDK,MOV10,NBL1,NOTCH1,NTRK2,NR4A2,OPHN1,PIK3CD,PLXNA1,MAPK1,MAPK3,MAPK7,RELN,PTCH1,PTN,PTPRA,PTPRO,NECTIN1,RAP1GAP,ROBO1,ROBO2,SHC1,SLIT1,SLIT3,SMO,SNX2,SPTBN1,SPTBN2,SYT4,NR2E1,UBE3A,EZR,WNT7A,YWHAH…
10_Member	GO Biological Processes	GO:0120039	plasma membrane bounded cell projection morphogenesis	-14.1404	-11.0603	132/659	348,393,396,399,547,575,577,627,658,885,1002,1009,1020,1136,1400,1501,1796,1947,1948,2011,2044,2064,2290,2534,2596,2697,2737,2817,2823,2887,3730,3897,3913,3925,4343,4681,4851,4915,4929,4983,5293,5361,5594,5595,5598,5649,5727,5764,5786,5800,5818,5909,6091,6092,6464,6585,6586,6608,6643,6711,6712,6860,7101,7337,7430,7476,7533,7852,8239,8437,8828,9253,9362,9706,9856,10154,10160,10458,10494,10500,1050…	APOE,ARHGAP4,ARHGDIA,RHOH,KIF1A,ADGRB1,ADGRB3,BDNF,BMPR1B,CCK,CDH4,CDH11,CDK5,CHRNA3,CRMP1,CTNND2,DOK1,EFNB1,EFNB2,MARK2,EPHA5,ERBB2,FOXG1,FYN,GAP43,GJA1,GLI3,GPC1,GPM6A,GRB10,ANOS1,L1CAM,LAMB2,STMN1,MOV10,NBL1,NOTCH1,NTRK2,NR4A2,OPHN1,PIK3CD,PLXNA1,MAPK1,MAPK3,MAPK7,RELN,PTCH1,PTN,PTPRA,PTPRO,NECTIN1,RAP1GAP,ROBO1,ROBO2,SHC1,SLIT1,SLIT3,SMO,SNX2,SPTBN1,SPTBN2,SYT4,NR2E1,UBE3A,EZR,WNT7A,YWHAH,CXC…
10_Member	GO Biological Processes	GO:0048667	cell morphogenesis involved in neuron differentiation	-13.2448	-10.3038	118/579	348,393,396,399,547,575,577,627,658,885,1002,1009,1020,1136,1400,1501,1796,1947,1948,2011,2044,2064,2290,2534,2596,2737,2817,2887,3280,3730,3897,3913,3925,4647,4851,4915,4929,4983,5293,5361,5594,5595,5598,5649,5727,5764,5786,5800,5818,5909,6091,6092,6464,6585,6586,6608,6711,6712,6904,7101,7337,7430,7476,7533,7852,8239,8828,9253,9706,9750,9856,10154,10160,10458,10494,10500,10501,10505,10611,11078,…	APOE,ARHGAP4,ARHGDIA,RHOH,KIF1A,ADGRB1,ADGRB3,BDNF,BMPR1B,CCK,CDH4,CDH11,CDK5,CHRNA3,CRMP1,CTNND2,DOK1,EFNB1,EFNB2,MARK2,EPHA5,ERBB2,FOXG1,FYN,GAP43,GLI3,GPC1,GRB10,HES1,ANOS1,L1CAM,LAMB2,STMN1,MYO7A,NOTCH1,NTRK2,NR4A2,OPHN1,PIK3CD,PLXNA1,MAPK1,MAPK3,MAPK7,RELN,PTCH1,PTN,PTPRA,PTPRO,NECTIN1,RAP1GAP,ROBO1,ROBO2,SHC1,SLIT1,SLIT3,SMO,SPTBN1,SPTBN2,TBCD,NR2E1,UBE3A,EZR,WNT7A,YWHAH,CXCR4,USP9X,NRP2,NU…
10_Member	GO Biological Processes	GO:0061564	axon development	-13.0873	-10.1755	107/507	348,393,396,399,575,627,658,885,1002,1009,1020,1268,1400,1796,1947,1948,2011,2044,2064,2281,2290,2316,2348,2534,2596,2737,2817,2887,3730,3897,3913,3925,4685,4851,4915,4929,4983,5293,5361,5594,5595,5598,5649,5727,5764,5786,5792,5800,5818,5909,6091,6092,6464,6585,6586,6608,6711,6712,7101,7430,7476,7852,8239,8828,8882,9253,9706,9856,10100,10154,10458,10494,10500,10501,10505,23129,23334,23654,25987,2…	APOE,ARHGAP4,ARHGDIA,RHOH,ADGRB1,BDNF,BMPR1B,CCK,CDH4,CDH11,CDK5,CNR1,CRMP1,DOK1,EFNB1,EFNB2,MARK2,EPHA5,ERBB2,FKBP1B,FOXG1,FLNA,FOLR1,FYN,GAP43,GLI3,GPC1,GRB10,ANOS1,L1CAM,LAMB2,STMN1,NCAM2,NOTCH1,NTRK2,NR4A2,OPHN1,PIK3CD,PLXNA1,MAPK1,MAPK3,MAPK7,RELN,PTCH1,PTN,PTPRA,PTPRF,PTPRO,NECTIN1,RAP1GAP,ROBO1,ROBO2,SHC1,SLIT1,SLIT3,SMO,SPTBN1,SPTBN2,NR2E1,EZR,WNT7A,CXCR4,USP9X,NRP2,ZPR1,NUMBL,ULK2,KIAA03…
10_Member	GO Biological Processes	GO:0006935	chemotaxis	-12.0569	-9.2097	124/644	399,409,627,658,727,1002,1012,1020,1230,1400,1525,1796,1845,1890,1906,1910,1947,1948,2044,2064,2247,2290,2534,2596,2737,2817,2887,2921,3265,3269,3315,3730,3897,3913,4067,4088,4192,4282,4681,4851,4856,4916,4983,5155,5156,5196,5293,5361,5479,5580,5587,5594,5595,5598,5649,5727,5764,5786,5800,5818,5872,5909,6091,6092,6441,6464,6585,6586,6608,6711,6712,7114,7409,7423,7430,7852,7857,8792,8828,9564,9750…	RHOH,ARRB2,BDNF,BMPR1B,C5,CDH4,CDH13,CDK5,CCR1,CRMP1,CXADR,DOK1,DUSP3,TYMP,EDN1,EDNRB,EFNB1,EFNB2,EPHA5,ERBB2,FGF2,FOXG1,FYN,GAP43,GLI3,GPC1,GRB10,CXCL3,HRAS,HRH1,HSPB1,ANOS1,L1CAM,LAMB2,LYN,SMAD3,MDK,MIF,NBL1,NOTCH1,CCN3,NTRK3,OPHN1,PDGFB,PDGFRA,PF4,PIK3CD,PLXNA1,PPIB,PRKCD,PRKD1,MAPK1,MAPK3,MAPK7,RELN,PTCH1,PTN,PTPRA,PTPRO,NECTIN1,RAB13,RAP1GAP,ROBO1,ROBO2,SFTPD,SHC1,SLIT1,SLIT3,SMO,SPTBN1,SPTB…
10_Member	GO Biological Processes	GO:0042330	taxis	-11.9602	-9.13274	124/646	399,409,627,658,727,1002,1012,1020,1230,1400,1525,1796,1845,1890,1906,1910,1947,1948,2044,2064,2247,2290,2534,2596,2737,2817,2887,2921,3265,3269,3315,3730,3897,3913,4067,4088,4192,4282,4681,4851,4856,4916,4983,5155,5156,5196,5293,5361,5479,5580,5587,5594,5595,5598,5649,5727,5764,5786,5800,5818,5872,5909,6091,6092,6441,6464,6585,6586,6608,6711,6712,7114,7409,7423,7430,7852,7857,8792,8828,9564,9750…	RHOH,ARRB2,BDNF,BMPR1B,C5,CDH4,CDH13,CDK5,CCR1,CRMP1,CXADR,DOK1,DUSP3,TYMP,EDN1,EDNRB,EFNB1,EFNB2,EPHA5,ERBB2,FGF2,FOXG1,FYN,GAP43,GLI3,GPC1,GRB10,CXCL3,HRAS,HRH1,HSPB1,ANOS1,L1CAM,LAMB2,LYN,SMAD3,MDK,MIF,NBL1,NOTCH1,CCN3,NTRK3,OPHN1,PDGFB,PDGFRA,PF4,PIK3CD,PLXNA1,PPIB,PRKCD,PRKD1,MAPK1,MAPK3,MAPK7,RELN,PTCH1,PTN,PTPRA,PTPRO,NECTIN1,RAB13,RAP1GAP,ROBO1,ROBO2,SFTPD,SHC1,SLIT1,SLIT3,SMO,SPTBN1,SPTB…
10_Member	GO Biological Processes	GO:0007409	axonogenesis	-11.9031	-9.08831	97/460	348,393,396,399,575,627,658,885,1002,1009,1020,1400,1796,1947,1948,2011,2044,2064,2290,2534,2596,2737,2817,2887,3730,3897,3913,3925,4851,4915,4929,4983,5293,5361,5594,5595,5598,5649,5727,5786,5800,5818,5909,6091,6092,6464,6585,6586,6608,6711,6712,7101,7430,7476,7852,8239,8828,9253,9706,9856,10154,10458,10494,10500,10501,10505,23129,23334,23654,25987,27255,51062,51393,51761,54413,55201,55715,55816…	APOE,ARHGAP4,ARHGDIA,RHOH,ADGRB1,BDNF,BMPR1B,CCK,CDH4,CDH11,CDK5,CRMP1,DOK1,EFNB1,EFNB2,MARK2,EPHA5,ERBB2,FOXG1,FYN,GAP43,GLI3,GPC1,GRB10,ANOS1,L1CAM,LAMB2,STMN1,NOTCH1,NTRK2,NR4A2,OPHN1,PIK3CD,PLXNA1,MAPK1,MAPK3,MAPK7,RELN,PTCH1,PTPRA,PTPRO,NECTIN1,RAP1GAP,ROBO1,ROBO2,SHC1,SLIT1,SLIT3,SMO,SPTBN1,SPTBN2,NR2E1,EZR,WNT7A,CXCR4,USP9X,NRP2,NUMBL,ULK2,KIAA0319,PLXNC1,BAIAP2,STK25,SEMA6C,SEMA6B,SEMA4F,…
10_Member	GO Biological Processes	GO:0097485	neuron projection guidance	-9.27901	-6.84438	63/278	399,627,658,1002,1020,1400,1796,1947,1948,2044,2064,2290,2534,2596,2737,2817,2887,3730,3897,3913,4851,4983,5293,5361,5594,5595,5598,5649,5727,5786,5800,5818,5909,6091,6092,6464,6585,6586,6608,6711,6712,7430,7852,8828,10154,10500,10501,10505,10570,23129,23654,27255,55715,55816,56896,64218,64221,91653,128434,170302,220164,223117,374946	RHOH,BDNF,BMPR1B,CDH4,CDK5,CRMP1,DOK1,EFNB1,EFNB2,EPHA5,ERBB2,FOXG1,FYN,GAP43,GLI3,GPC1,GRB10,ANOS1,L1CAM,LAMB2,NOTCH1,OPHN1,PIK3CD,PLXNA1,MAPK1,MAPK3,MAPK7,RELN,PTCH1,PTPRA,PTPRO,NECTIN1,RAP1GAP,ROBO1,ROBO2,SHC1,SLIT1,SLIT3,SMO,SPTBN1,SPTBN2,EZR,CXCR4,NRP2,PLXNC1,SEMA6C,SEMA6B,SEMA4F,DPYSL4,PLXND1,PLXNB2,CNTN6,DOK4,DOK5,DPYSL5,SEMA4A,ROBO3,BOC,VSTM2L,ARX,DOK6,SEMA3D,DRAXIN
10_Member	GO Biological Processes	GO:0007411	axon guidance	-8.91682	-6.52639	62/277	399,627,658,1002,1020,1400,1796,1947,1948,2044,2064,2290,2534,2596,2737,2817,2887,3730,3897,3913,4851,4983,5293,5361,5594,5595,5598,5649,5727,5786,5800,5818,5909,6091,6092,6464,6585,6586,6608,6711,6712,7430,7852,8828,10154,10500,10501,10505,23129,23654,27255,55715,55816,56896,64218,64221,91653,128434,170302,220164,223117,374946	RHOH,BDNF,BMPR1B,CDH4,CDK5,CRMP1,DOK1,EFNB1,EFNB2,EPHA5,ERBB2,FOXG1,FYN,GAP43,GLI3,GPC1,GRB10,ANOS1,L1CAM,LAMB2,NOTCH1,OPHN1,PIK3CD,PLXNA1,MAPK1,MAPK3,MAPK7,RELN,PTCH1,PTPRA,PTPRO,NECTIN1,RAP1GAP,ROBO1,ROBO2,SHC1,SLIT1,SLIT3,SMO,SPTBN1,SPTBN2,EZR,CXCR4,NRP2,PLXNC1,SEMA6C,SEMA6B,SEMA4F,PLXND1,PLXNB2,CNTN6,DOK4,DOK5,DPYSL5,SEMA4A,ROBO3,BOC,VSTM2L,ARX,DOK6,SEMA3D,DRAXIN
10_Member	KEGG Pathway	ko04360	Axon guidance	-5.40545	-3.59455	38/175	658,817,1020,1947,1948,2044,2534,2771,3265,3897,5293,5296,5361,5594,5595,5727,6091,6092,6585,6586,6608,7852,10154,10500,10501,10505,22885,23654,54361,56896,56924,57522,57689,64218,64221,84628,91653,223117	BMPR1B,CAMK2D,CDK5,EFNB1,EFNB2,EPHA5,FYN,GNAI2,HRAS,L1CAM,PIK3CD,PIK3R2,PLXNA1,MAPK1,MAPK3,PTCH1,ROBO1,ROBO2,SLIT1,SLIT3,SMO,CXCR4,PLXNC1,SEMA6C,SEMA6B,SEMA4F,ABLIM3,PLXNB2,WNT4,DPYSL5,PAK6,SRGAP1,LRRC4C,SEMA4A,ROBO3,NTNG2,BOC,SEMA3D
10_Member	KEGG Pathway	hsa04360	Axon guidance	-4.96352	-3.23198	40/196	658,817,1020,1947,1948,2044,2534,2771,3265,3897,5293,5296,5361,5594,5595,5727,6091,6092,6585,6586,6608,7852,8326,10154,10500,10501,10505,22885,23654,54361,56896,56924,57522,57689,64218,64221,84628,91653,103910,223117	BMPR1B,CAMK2D,CDK5,EFNB1,EFNB2,EPHA5,FYN,GNAI2,HRAS,L1CAM,PIK3CD,PIK3R2,PLXNA1,MAPK1,MAPK3,PTCH1,ROBO1,ROBO2,SLIT1,SLIT3,SMO,CXCR4,FZD9,PLXNC1,SEMA6C,SEMA6B,SEMA4F,ABLIM3,PLXNB2,WNT4,DPYSL5,PAK6,SRGAP1,LRRC4C,SEMA4A,ROBO3,NTNG2,BOC,MYL12B,SEMA3D
11_Summary	GO Biological Processes	GO:0016054	organic acid catabolic process	-13.51	-10.5128	73/284	33,35,37,215,384,493,501,875,1036,1268,1428,1592,1629,1757,1891,2108,2109,2110,2184,2247,2639,2731,2746,2747,3028,3033,3067,3073,3155,3248,3373,3712,4143,4329,5092,5106,5446,5465,5471,5625,6652,6898,7263,8309,8310,10005,10295,10449,10588,10840,10894,11001,23564,23576,25828,26063,51102,54677,55258,55577,56898,58510,66002,78991,84696,84706,84830,89874,126129,152926,197257,259307,414328,217,229,348,…	ACADL,ACADS,ACADVL,ABCD1,ARG2,ATP2B4,ALDH7A1,CBS,CDO1,CNR1,CRYM,CYP26A1,DBT,SARDH,ECH1,ETFA,ETFB,ETFDH,FAH,FGF2,GCDH,GLDC,GLUD1,GLUD2,HSD17B10,HADH,HDC,HEXA,HMGCL,HPGD,HYAL1,IVD,MAT1A,ALDH6A1,PCBD1,PCK2,PON3,PPARA,PPAT,PRODH,SORD,TAT,TST,ACOX2,ACOX3,ACOT8,BCKDK,ACAA2,MTHFS,ALDH1L1,LYVE1,SLC27A2,DDAH2,DDAH1,TXN2,DECR2,MECR,CROT,THNSL2,NAGK,BDH2,PRODH2,CYP4F12,PCYOX1L,ABHD1,GPT2,ADTRP,SLC25A21,CPT1…
11_Member	GO Biological Processes	GO:0016054	organic acid catabolic process	-13.51	-10.5128	73/284	33,35,37,215,384,493,501,875,1036,1268,1428,1592,1629,1757,1891,2108,2109,2110,2184,2247,2639,2731,2746,2747,3028,3033,3067,3073,3155,3248,3373,3712,4143,4329,5092,5106,5446,5465,5471,5625,6652,6898,7263,8309,8310,10005,10295,10449,10588,10840,10894,11001,23564,23576,25828,26063,51102,54677,55258,55577,56898,58510,66002,78991,84696,84706,84830,89874,126129,152926,197257,259307,414328	ACADL,ACADS,ACADVL,ABCD1,ARG2,ATP2B4,ALDH7A1,CBS,CDO1,CNR1,CRYM,CYP26A1,DBT,SARDH,ECH1,ETFA,ETFB,ETFDH,FAH,FGF2,GCDH,GLDC,GLUD1,GLUD2,HSD17B10,HADH,HDC,HEXA,HMGCL,HPGD,HYAL1,IVD,MAT1A,ALDH6A1,PCBD1,PCK2,PON3,PPARA,PPAT,PRODH,SORD,TAT,TST,ACOX2,ACOX3,ACOT8,BCKDK,ACAA2,MTHFS,ALDH1L1,LYVE1,SLC27A2,DDAH2,DDAH1,TXN2,DECR2,MECR,CROT,THNSL2,NAGK,BDH2,PRODH2,CYP4F12,PCYOX1L,ABHD1,GPT2,ADTRP,SLC25A21,CPT1…
11_Member	GO Biological Processes	GO:0046395	carboxylic acid catabolic process	-13.51	-10.5128	73/284	33,35,37,215,384,493,501,875,1036,1268,1428,1592,1629,1757,1891,2108,2109,2110,2184,2247,2639,2731,2746,2747,3028,3033,3067,3073,3155,3248,3373,3712,4143,4329,5092,5106,5446,5465,5471,5625,6652,6898,7263,8309,8310,10005,10295,10449,10588,10840,10894,11001,23564,23576,25828,26063,51102,54677,55258,55577,56898,58510,66002,78991,84696,84706,84830,89874,126129,152926,197257,259307,414328	ACADL,ACADS,ACADVL,ABCD1,ARG2,ATP2B4,ALDH7A1,CBS,CDO1,CNR1,CRYM,CYP26A1,DBT,SARDH,ECH1,ETFA,ETFB,ETFDH,FAH,FGF2,GCDH,GLDC,GLUD1,GLUD2,HSD17B10,HADH,HDC,HEXA,HMGCL,HPGD,HYAL1,IVD,MAT1A,ALDH6A1,PCBD1,PCK2,PON3,PPARA,PPAT,PRODH,SORD,TAT,TST,ACOX2,ACOX3,ACOT8,BCKDK,ACAA2,MTHFS,ALDH1L1,LYVE1,SLC27A2,DDAH2,DDAH1,TXN2,DECR2,MECR,CROT,THNSL2,NAGK,BDH2,PRODH2,CYP4F12,PCYOX1L,ABHD1,GPT2,ADTRP,SLC25A21,CPT1…
11_Member	GO Biological Processes	GO:0044282	small molecule catabolic process	-13.2313	-10.3038	100/458	33,35,37,215,217,229,348,384,493,501,572,875,955,1036,1268,1428,1592,1629,1757,1806,1890,1891,2023,2108,2109,2110,2184,2247,2523,2639,2731,2746,2747,3028,3033,3067,3073,3099,3155,3248,3373,3607,3712,4143,4329,4923,5019,5092,5106,5313,5446,5465,5471,5625,6652,6898,7263,8309,8310,10005,10295,10449,10588,10690,10840,10858,10894,11001,23564,23576,25828,26007,26063,27294,51102,51251,54677,55258,55577,…	ACADL,ACADS,ACADVL,ABCD1,ALDH2,ALDOB,APOE,ARG2,ATP2B4,ALDH7A1,BAD,CBS,ENTPD6,CDO1,CNR1,CRYM,CYP26A1,DBT,SARDH,DPYD,TYMP,ECH1,ENO1,ETFA,ETFB,ETFDH,FAH,FGF2,FUT1,GCDH,GLDC,GLUD1,GLUD2,HSD17B10,HADH,HDC,HEXA,HK2,HMGCL,HPGD,HYAL1,FOXK2,IVD,MAT1A,ALDH6A1,NTSR1,OXCT1,PCBD1,PCK2,PKLR,PON3,PPARA,PPAT,PRODH,SORD,TAT,TST,ACOX2,ACOX3,ACOT8,BCKDK,ACAA2,MTHFS,FUT9,ALDH1L1,CYP46A1,LYVE1,SLC27A2,DDAH2,DDAH1,TXN…
11_Member	GO Biological Processes	GO:0006520	cellular amino acid metabolic process	-9.60113	-7.12304	77/365	384,445,493,501,635,670,875,1036,1428,1629,1728,1757,1806,2184,2356,2628,2639,2731,2746,2747,2937,3028,3067,3155,3712,4143,4329,4482,4947,5092,5188,5471,5625,5689,5690,5691,5695,5714,5720,5721,5805,5831,6567,6898,7263,7299,8974,10056,10295,10400,10549,10588,22929,23438,23564,23576,23657,23743,25828,26227,29968,51078,51686,55258,56954,57176,58510,63826,65263,78991,84706,89874,113451,121278,124454,…	ARG2,ASS1,ATP2B4,ALDH7A1,BHMT,BPHL,CBS,CDO1,CRYM,DBT,NQO1,SARDH,DPYD,FAH,FPGS,GATM,GCDH,GLDC,GLUD1,GLUD2,GSS,HSD17B10,HDC,HMGCL,IVD,MAT1A,ALDH6A1,MSRA,OAZ2,PCBD1,GATB,PPAT,PRODH,PSMB1,PSMB2,PSMB3,PSMB7,PSMD8,PSME1,PSME2,PTS,PYCR1,SLC16A2,TAT,TST,TYR,P4HA2,FARSB,BCKDK,PEMT,PRDX4,MTHFS,SEPHS1,HARS2,DDAH2,DDAH1,SLC7A11,BHMT2,TXN2,PHGDH,PSAT1,THAP4,OAZ3,THNSL2,NIT2,VARS2,PRODH2,SRR,PYCR3,PCYOX1L,GPT2…
11_Member	Reactome Gene Sets	R-HSA-71291	Metabolism of amino acids and derivatives	-7.98253	-5.73083	74/374	223,384,445,501,635,875,1036,1428,1629,1728,1734,1757,2184,2628,2639,2731,2746,2747,3028,3067,3712,4143,4329,4947,4948,5092,5409,5625,5689,5690,5691,5695,5714,5720,5721,5831,6136,6137,6154,6155,6157,6158,6159,6181,6191,6203,6204,6208,6222,6520,6723,6898,7263,7299,7306,8424,10295,23743,25828,26227,29958,29968,51686,58472,58510,63826,65263,84706,89874,113451,116832,121278,152926,259307	ALDH9A1,ARG2,ASS1,ALDH7A1,BHMT,CBS,CDO1,CRYM,DBT,NQO1,DIO2,SARDH,FAH,GATM,GCDH,GLDC,GLUD1,GLUD2,HSD17B10,HDC,IVD,MAT1A,ALDH6A1,OAZ2,OCA2,PCBD1,PNMT,PRODH,PSMB1,PSMB2,PSMB3,PSMB7,PSMD8,PSME1,PSME2,PYCR1,RPL12,RPL13,RPL26,RPL27,RPL27A,RPL28,RPL29,RPLP2,RPS4X,RPS9,RPS10,RPS14,RPS18,SLC3A2,SRM,TAT,TST,TYR,TYRP1,BBOX1,BCKDK,BHMT2,TXN2,PHGDH,DMGDH,PSAT1,OAZ3,SQOR,PRODH2,SRR,PYCR3,GPT2,SLC25A21,AZIN2,RP…
11_Member	GO Biological Processes	GO:0009063	cellular amino acid catabolic process	-7.97018	-5.72187	35/124	384,493,501,875,1036,1428,1629,1757,2184,2639,2731,2746,2747,3028,3067,3155,3712,4143,4329,5092,5471,5625,6898,7263,10295,23564,23576,25828,55258,58510,78991,84706,89874,152926,259307	ARG2,ATP2B4,ALDH7A1,CBS,CDO1,CRYM,DBT,SARDH,FAH,GCDH,GLDC,GLUD1,GLUD2,HSD17B10,HDC,HMGCL,IVD,MAT1A,ALDH6A1,PCBD1,PPAT,PRODH,TAT,TST,BCKDK,DDAH2,DDAH1,TXN2,THNSL2,PRODH2,PCYOX1L,GPT2,SLC25A21,PPM1K,IL4I1
11_Member	GO Biological Processes	GO:1901605	alpha-amino acid metabolic process	-7.38797	-5.22219	51/229	384,445,493,501,635,875,1036,1428,1757,2184,2356,2628,2639,2731,2746,2747,3028,3067,3155,3712,4143,4329,4482,5092,5471,5625,5831,6898,7263,7299,8974,10400,10549,10588,22929,23564,23576,23657,23743,26227,29968,51078,55258,56954,58510,63826,65263,84706,89874,113451,259307	ARG2,ASS1,ATP2B4,ALDH7A1,BHMT,CBS,CDO1,CRYM,SARDH,FAH,FPGS,GATM,GCDH,GLDC,GLUD1,GLUD2,HSD17B10,HDC,HMGCL,IVD,MAT1A,ALDH6A1,MSRA,PCBD1,PPAT,PRODH,PYCR1,TAT,TST,TYR,P4HA2,PEMT,PRDX4,MTHFS,SEPHS1,DDAH2,DDAH1,SLC7A11,BHMT2,PHGDH,PSAT1,THAP4,THNSL2,NIT2,PRODH2,SRR,PYCR3,GPT2,SLC25A21,AZIN2,IL4I1
11_Member	GO Biological Processes	GO:1901606	alpha-amino acid catabolic process	-6.50248	-4.50223	29/105	384,493,501,875,1036,1428,1757,2184,2639,2731,2746,2747,3028,3067,3155,3712,4143,4329,5092,5471,5625,6898,23564,23576,55258,58510,84706,89874,259307	ARG2,ATP2B4,ALDH7A1,CBS,CDO1,CRYM,SARDH,FAH,GCDH,GLDC,GLUD1,GLUD2,HSD17B10,HDC,HMGCL,IVD,MAT1A,ALDH6A1,PCBD1,PPAT,PRODH,TAT,DDAH2,DDAH1,THNSL2,PRODH2,GPT2,SLC25A21,IL4I1
12_Summary	GO Biological Processes	GO:0009991	response to extracellular stimulus	-13.4067	-10.428	109/515	116,154,249,317,348,360,445,585,590,784,834,875,885,968,1026,1032,1208,1268,1592,1611,1728,1978,1981,2029,2281,2348,2534,2629,2771,2937,3155,3157,3171,3208,3358,3383,3428,3607,3725,3939,3992,4067,4330,4353,4852,4929,4968,4988,5019,5026,5106,5164,5251,5313,5465,5563,5582,5587,5594,5595,5764,5788,6263,6423,6494,6581,6591,6652,6678,6750,6751,6752,7071,7184,7274,7299,7421,8805,8897,9227,9607,9706,103…	ADCYAP1,ADRB2,ALPL,APAF1,APOE,AQP3,ASS1,BBS4,BCHE,CACNB3,CASP1,CBS,CCK,CD68,CDKN1A,CDKN2D,CLPS,CNR1,CYP26A1,DAP,NQO1,EIF4EBP1,EIF4G1,ENSA,FKBP1B,FOLR1,FYN,GBA,GNAI2,GSS,HMGCL,HMGCS1,FOXA3,HPCA,HTR2C,ICAM1,IFI16,FOXK2,JUN,LDHA,FADS1,LYN,MN1,MPO,NPY,NR4A2,OGG1,OPRM1,OXCT1,P2RX5,PCK2,PDK2,PHEX,PKLR,PPARA,PRKAA2,PRKCG,PRKD1,MAPK1,MAPK3,PTN,PTPRC,RYR3,SFRP2,SIPA1,SLC22A3,SNAI2,SORD,SPARC,SST,SSTR1,SST…
12_Member	GO Biological Processes	GO:0009991	response to extracellular stimulus	-13.4067	-10.428	109/515	116,154,249,317,348,360,445,585,590,784,834,875,885,968,1026,1032,1208,1268,1592,1611,1728,1978,1981,2029,2281,2348,2534,2629,2771,2937,3155,3157,3171,3208,3358,3383,3428,3607,3725,3939,3992,4067,4330,4353,4852,4929,4968,4988,5019,5026,5106,5164,5251,5313,5465,5563,5582,5587,5594,5595,5764,5788,6263,6423,6494,6581,6591,6652,6678,6750,6751,6752,7071,7184,7274,7299,7421,8805,8897,9227,9607,9706,103…	ADCYAP1,ADRB2,ALPL,APAF1,APOE,AQP3,ASS1,BBS4,BCHE,CACNB3,CASP1,CBS,CCK,CD68,CDKN1A,CDKN2D,CLPS,CNR1,CYP26A1,DAP,NQO1,EIF4EBP1,EIF4G1,ENSA,FKBP1B,FOLR1,FYN,GBA,GNAI2,GSS,HMGCL,HMGCS1,FOXA3,HPCA,HTR2C,ICAM1,IFI16,FOXK2,JUN,LDHA,FADS1,LYN,MN1,MPO,NPY,NR4A2,OGG1,OPRM1,OXCT1,P2RX5,PCK2,PDK2,PHEX,PKLR,PPARA,PRKAA2,PRKCG,PRKD1,MAPK1,MAPK3,PTN,PTPRC,RYR3,SFRP2,SIPA1,SLC22A3,SNAI2,SORD,SPARC,SST,SSTR1,SST…
12_Member	GO Biological Processes	GO:0031667	response to nutrient levels	-10.9871	-8.24096	99/490	116,154,249,317,348,360,445,585,590,784,834,885,968,1026,1032,1208,1268,1592,1611,1728,1978,1981,2029,2281,2348,2534,2629,2771,2937,3155,3157,3171,3208,3358,3383,3428,3607,3725,3939,3992,4330,4353,4852,4968,4988,5019,5026,5106,5164,5251,5313,5465,5563,5582,5587,5594,5595,5764,6263,6423,6581,6591,6652,6678,6750,6751,6752,7071,7184,7274,7299,7421,8805,8897,9227,9607,9706,10325,10400,10518,11133,111…	ADCYAP1,ADRB2,ALPL,APAF1,APOE,AQP3,ASS1,BBS4,BCHE,CACNB3,CASP1,CCK,CD68,CDKN1A,CDKN2D,CLPS,CNR1,CYP26A1,DAP,NQO1,EIF4EBP1,EIF4G1,ENSA,FKBP1B,FOLR1,FYN,GBA,GNAI2,GSS,HMGCL,HMGCS1,FOXA3,HPCA,HTR2C,ICAM1,IFI16,FOXK2,JUN,LDHA,FADS1,MN1,MPO,NPY,OGG1,OPRM1,OXCT1,P2RX5,PCK2,PDK2,PHEX,PKLR,PPARA,PRKAA2,PRKCG,PRKD1,MAPK1,MAPK3,PTN,RYR3,SFRP2,SLC22A3,SNAI2,SORD,SPARC,SST,SSTR1,SSTR2,KLF10,HSP90B1,TTPA,TYR,…
12_Member	GO Biological Processes	GO:0071496	cellular response to external stimulus	-7.85812	-5.62632	67/328	358,360,572,784,834,875,968,1026,1611,1981,2348,2534,2629,2697,3171,3383,3428,3553,3725,3992,4055,4067,4330,4929,5138,5164,5251,5465,5563,5587,5594,5595,5734,5764,5788,6263,6423,6494,6591,6662,7071,7099,7184,7421,8805,8897,9531,9607,9750,10325,10518,11133,11170,23334,25828,26153,54361,55364,64121,64805,79077,84557,84687,92196,93649,136319,652968	AQP1,AQP3,BAD,CACNB3,CASP1,CBS,CD68,CDKN1A,DAP,EIF4G1,FOLR1,FYN,GBA,GJA1,FOXA3,ICAM1,IFI16,IL1B,JUN,FADS1,LTBR,LYN,MN1,NR4A2,PDE2A,PDK2,PHEX,PPARA,PRKAA2,PRKD1,MAPK1,MAPK3,PTGER4,PTN,PTPRC,RYR3,SFRP2,SIPA1,SNAI2,SOX9,KLF10,TLR4,HSP90B1,VDR,TRIM24,MTMR3,BAG3,CARTPT,RIPOR2,RRAGB,CIB2,KPTN,FAM107A,SZT2,TXN2,KIF26A,WNT4,IMPACT,RRAGC,P2RY12,DCTPP1,MAP1LC3A,PPP1R9B,DAPL1,MYOCD,MTPN,CASTOR1
12_Member	GO Biological Processes	GO:0031668	cellular response to extracellular stimulus	-6.71483	-4.6843	54/260	360,784,875,968,1026,1611,1981,2348,2534,2629,3171,3383,3428,3725,3992,4067,4330,4929,5164,5251,5465,5563,5587,5594,5595,5764,5788,6263,6423,6494,6591,7071,7184,7421,8805,8897,9607,10325,10518,11133,11170,23334,25828,26153,54361,55364,64121,64805,79077,84557,84687,92196,93649,652968	AQP3,CACNB3,CBS,CD68,CDKN1A,DAP,EIF4G1,FOLR1,FYN,GBA,FOXA3,ICAM1,IFI16,JUN,FADS1,LYN,MN1,NR4A2,PDK2,PHEX,PPARA,PRKAA2,PRKD1,MAPK1,MAPK3,PTN,PTPRC,RYR3,SFRP2,SIPA1,SNAI2,KLF10,HSP90B1,VDR,TRIM24,MTMR3,CARTPT,RRAGB,CIB2,KPTN,FAM107A,SZT2,TXN2,KIF26A,WNT4,IMPACT,RRAGC,P2RY12,DCTPP1,MAP1LC3A,PPP1R9B,DAPL1,MYOCD,CASTOR1
12_Member	GO Biological Processes	GO:0007584	response to nutrient	-6.70427	-4.67578	46/207	249,317,360,445,590,834,1032,1268,1592,1728,2029,2281,2348,2534,2771,3155,3157,3208,3939,4330,4968,5019,5026,5164,5251,5313,5764,6263,6423,6591,6678,6750,7184,7274,7299,7421,8805,9227,10400,10518,22953,23376,56477,64240,64805,652968	ALPL,APAF1,AQP3,ASS1,BCHE,CASP1,CDKN2D,CNR1,CYP26A1,NQO1,ENSA,FKBP1B,FOLR1,FYN,GNAI2,HMGCL,HMGCS1,HPCA,LDHA,MN1,OGG1,OXCT1,P2RX5,PDK2,PHEX,PKLR,PTN,RYR3,SFRP2,SNAI2,SPARC,SST,HSP90B1,TTPA,TYR,VDR,TRIM24,LRAT,PEMT,CIB2,P2RX2,UFL1,CCL28,ABCG5,P2RY12,CASTOR1
12_Member	GO Biological Processes	GO:0031669	cellular response to nutrient levels	-4.36853	-2.75781	44/236	360,784,968,1026,1611,1981,2348,2534,2629,3171,3383,3428,3725,3992,4330,5164,5251,5465,5563,5587,5594,5595,5764,6263,6591,7071,7184,7421,8805,8897,9607,10325,10518,11133,11170,23334,25828,54361,55364,64121,64805,84557,92196,652968	AQP3,CACNB3,CD68,CDKN1A,DAP,EIF4G1,FOLR1,FYN,GBA,FOXA3,ICAM1,IFI16,JUN,FADS1,MN1,PDK2,PHEX,PPARA,PRKAA2,PRKD1,MAPK1,MAPK3,PTN,RYR3,SNAI2,KLF10,HSP90B1,VDR,TRIM24,MTMR3,CARTPT,RRAGB,CIB2,KPTN,FAM107A,SZT2,TXN2,WNT4,IMPACT,RRAGC,P2RY12,MAP1LC3A,DAPL1,CASTOR1
12_Member	GO Biological Processes	GO:1990928	response to amino acid starvation	-3.62725	-2.18109	14/49	1026,1611,1978,5587,5594,5595,10325,11133,23334,23367,55364,64121,84557,92196	CDKN1A,DAP,EIF4EBP1,PRKD1,MAPK1,MAPK3,RRAGB,KPTN,SZT2,LARP1,IMPACT,RRAGC,MAP1LC3A,DAPL1
12_Member	GO Biological Processes	GO:0034198	cellular response to amino acid starvation	-2.80625	-1.56079	12/46	1026,1611,5587,5594,5595,10325,11133,23334,55364,64121,84557,92196	CDKN1A,DAP,PRKD1,MAPK1,MAPK3,RRAGB,KPTN,SZT2,IMPACT,RRAGC,MAP1LC3A,DAPL1
12_Member	GO Biological Processes	GO:0042594	response to starvation	-2.65558	-1.44093	33/196	116,1026,1611,1978,2629,3155,3171,3428,3607,3725,3992,5019,5106,5465,5563,5587,5594,5595,6751,6752,7071,8897,9607,9706,10325,11133,23334,23367,54361,55364,64121,84557,92196	ADCYAP1,CDKN1A,DAP,EIF4EBP1,GBA,HMGCL,FOXA3,IFI16,FOXK2,JUN,FADS1,OXCT1,PCK2,PPARA,PRKAA2,PRKD1,MAPK1,MAPK3,SSTR1,SSTR2,KLF10,MTMR3,CARTPT,ULK2,RRAGB,KPTN,SZT2,LARP1,WNT4,IMPACT,RRAGC,MAP1LC3A,DAPL1
13_Summary	Reactome Gene Sets	R-HSA-112316	Neuronal System	-13.3854	-10.4244	93/410	113,163,217,590,784,808,817,1136,1142,1740,2319,2550,2555,2556,2558,2560,2742,2771,2783,2786,2897,2898,2899,2900,2905,2911,3265,3739,3754,3755,3758,3768,3776,3777,3781,3782,3784,3785,3786,4128,4916,5330,5563,5582,5594,5595,5792,6507,6804,6844,6854,7277,7280,8001,8573,8973,9177,9256,9312,9379,9568,10242,10368,10376,10383,10611,27345,50944,54331,54413,55879,55970,56659,57030,57497,57555,57576,57596…	ADCY7,AP2B1,ALDH2,BCHE,CACNB3,CALM3,CAMK2D,CHRNA3,CHRNB3,DLG2,FLOT2,GABBR1,GABRA2,GABRA3,GABRA5,GABRB1,GLRA2,GNAI2,GNB2,GNG4,GRIK1,GRIK2,GRIK3,GRIK4,GRIN2C,GRM1,HRAS,KCNA4,KCNF1,KCNG1,KCNJ1,KCNJ12,KCNK2,KCNK3,KCNN2,KCNN3,KCNQ1,KCNQ2,KCNQ3,MAOA,NTRK3,PLCB2,PRKAA2,PRKCG,MAPK1,MAPK3,PTPRF,SLC1A3,STX1A,VAMP2,SYN2,TUBA4A,TUBB2A,GLRA3,CASK,CHRNA6,HTR3B,TSPOAP1,KCNB2,NRXN2,GABBR2,KCNMB2,CACNG3,TUBA1B,TU…
13_Member	Reactome Gene Sets	R-HSA-112316	Neuronal System	-13.3854	-10.4244	93/410	113,163,217,590,784,808,817,1136,1142,1740,2319,2550,2555,2556,2558,2560,2742,2771,2783,2786,2897,2898,2899,2900,2905,2911,3265,3739,3754,3755,3758,3768,3776,3777,3781,3782,3784,3785,3786,4128,4916,5330,5563,5582,5594,5595,5792,6507,6804,6844,6854,7277,7280,8001,8573,8973,9177,9256,9312,9379,9568,10242,10368,10376,10383,10611,27345,50944,54331,54413,55879,55970,56659,57030,57497,57555,57576,57596…	ADCY7,AP2B1,ALDH2,BCHE,CACNB3,CALM3,CAMK2D,CHRNA3,CHRNB3,DLG2,FLOT2,GABBR1,GABRA2,GABRA3,GABRA5,GABRB1,GLRA2,GNAI2,GNB2,GNG4,GRIK1,GRIK2,GRIK3,GRIK4,GRIN2C,GRM1,HRAS,KCNA4,KCNF1,KCNG1,KCNJ1,KCNJ12,KCNK2,KCNK3,KCNN2,KCNN3,KCNQ1,KCNQ2,KCNQ3,MAOA,NTRK3,PLCB2,PRKAA2,PRKCG,MAPK1,MAPK3,PTPRF,SLC1A3,STX1A,VAMP2,SYN2,TUBA4A,TUBB2A,GLRA3,CASK,CHRNA6,HTR3B,TSPOAP1,KCNB2,NRXN2,GABBR2,KCNMB2,CACNG3,TUBA1B,TU…
13_Member	Reactome Gene Sets	R-HSA-112314	Neurotransmitter receptors and postsynaptic signal transmission	-8.17015	-5.89403	49/205	113,163,808,817,1136,1142,1740,2550,2555,2556,2558,2560,2742,2771,2783,2786,2897,2898,2899,2900,2905,3265,3768,5330,5563,5582,5594,5595,7277,7280,8001,8573,8973,9177,9568,10368,10376,10383,54331,55879,55970,57576,59345,64130,84790,113457,116443,285242,347688	ADCY7,AP2B1,CALM3,CAMK2D,CHRNA3,CHRNB3,DLG2,GABBR1,GABRA2,GABRA3,GABRA5,GABRB1,GLRA2,GNAI2,GNB2,GNG4,GRIK1,GRIK2,GRIK3,GRIK4,GRIN2C,HRAS,KCNJ12,PLCB2,PRKAA2,PRKCG,MAPK1,MAPK3,TUBA4A,TUBB2A,GLRA3,CASK,CHRNA6,HTR3B,GABBR2,CACNG3,TUBA1B,TUBB4B,GNG2,GABRQ,GNG12,KIF17,GNB4,LIN7B,TUBA1C,TUBA3D,GRIN3A,HTR3E,TUBB8
13_Member	Reactome Gene Sets	R-HSA-112315	Transmission across Chemical Synapses	-8.10989	-5.8444	59/270	113,163,217,590,784,808,817,1136,1142,1740,2550,2555,2556,2558,2560,2742,2771,2783,2786,2897,2898,2899,2900,2905,3265,3768,4128,5330,5563,5582,5594,5595,6507,6804,6844,6854,7277,7280,8001,8573,8973,9177,9256,9568,10368,10376,10383,54331,55879,55970,57030,57576,59345,64130,84790,113457,116443,285242,347688	ADCY7,AP2B1,ALDH2,BCHE,CACNB3,CALM3,CAMK2D,CHRNA3,CHRNB3,DLG2,GABBR1,GABRA2,GABRA3,GABRA5,GABRB1,GLRA2,GNAI2,GNB2,GNG4,GRIK1,GRIK2,GRIK3,GRIK4,GRIN2C,HRAS,KCNJ12,MAOA,PLCB2,PRKAA2,PRKCG,MAPK1,MAPK3,SLC1A3,STX1A,VAMP2,SYN2,TUBA4A,TUBB2A,GLRA3,CASK,CHRNA6,HTR3B,TSPOAP1,GABBR2,CACNG3,TUBA1B,TUBB4B,GNG2,GABRQ,GNG12,SLC17A7,KIF17,GNB4,LIN7B,TUBA1C,TUBA3D,GRIN3A,HTR3E,TUBB8
14_Summary	GO Biological Processes	GO:0010035	response to inorganic substance	-12.5864	-9.70463	111/543	113,311,358,360,366,445,493,572,641,808,817,948,955,1017,1393,1728,1740,1906,2203,2281,2534,2742,2775,2937,2978,3039,3040,3157,3208,3383,3707,3725,3777,3939,4129,4353,4489,4490,4493,4494,4495,4496,4499,4501,4502,4602,4968,5052,5176,5251,5313,5563,5580,5594,5595,5598,5603,5727,5831,6261,6263,6284,6415,6494,6609,6622,6652,6678,6786,6860,6861,6898,7273,7295,7337,7415,7781,8013,8437,9033,9076,9362,95…	ADCY7,ANXA11,AQP1,AQP3,AQP9,ASS1,ATP2B4,BAD,BLM,CALM3,CAMK2D,CD36,ENTPD6,CDK2,CRHBP,NQO1,DLG2,EDN1,FBP1,FKBP1B,FYN,GLRA2,GNAO1,GSS,GUCA1A,HBA1,HBA2,HMGCS1,HPCA,ICAM1,ITPKB,JUN,KCNK3,LDHA,MAOB,MPO,MT1A,MT1B,MT1E,MT1F,MT1G,MT1H,MT1M,MT1X,MT2A,MYB,OGG1,PRDX1,SERPINF1,PHEX,PKLR,PRKAA2,PRKCD,MAPK1,MAPK3,MAPK7,MAPK13,PTCH1,PYCR1,RYR1,RYR3,S100A13,SELENOW,SIPA1,SMPD1,SNCA,SORD,SPARC,STIM1,SYT4,SYT5,TAT,…
14_Member	GO Biological Processes	GO:0010035	response to inorganic substance	-12.5864	-9.70463	111/543	113,311,358,360,366,445,493,572,641,808,817,948,955,1017,1393,1728,1740,1906,2203,2281,2534,2742,2775,2937,2978,3039,3040,3157,3208,3383,3707,3725,3777,3939,4129,4353,4489,4490,4493,4494,4495,4496,4499,4501,4502,4602,4968,5052,5176,5251,5313,5563,5580,5594,5595,5598,5603,5727,5831,6261,6263,6284,6415,6494,6609,6622,6652,6678,6786,6860,6861,6898,7273,7295,7337,7415,7781,8013,8437,9033,9076,9362,95…	ADCY7,ANXA11,AQP1,AQP3,AQP9,ASS1,ATP2B4,BAD,BLM,CALM3,CAMK2D,CD36,ENTPD6,CDK2,CRHBP,NQO1,DLG2,EDN1,FBP1,FKBP1B,FYN,GLRA2,GNAO1,GSS,GUCA1A,HBA1,HBA2,HMGCS1,HPCA,ICAM1,ITPKB,JUN,KCNK3,LDHA,MAOB,MPO,MT1A,MT1B,MT1E,MT1F,MT1G,MT1H,MT1M,MT1X,MT2A,MYB,OGG1,PRDX1,SERPINF1,PHEX,PKLR,PRKAA2,PRKCD,MAPK1,MAPK3,MAPK7,MAPK13,PTCH1,PYCR1,RYR1,RYR3,S100A13,SELENOW,SIPA1,SMPD1,SNCA,SORD,SPARC,STIM1,SYT4,SYT5,TAT,…
14_Member	GO Biological Processes	GO:0010038	response to metal ion	-9.1837	-6.75422	74/352	113,311,358,360,366,445,572,808,817,955,1393,1728,1740,1906,2203,2742,2937,2978,3208,3383,3707,3725,3777,4129,4489,4490,4493,4494,4495,4496,4499,4501,4502,4968,5176,5313,5563,5594,5595,6261,6263,6284,6609,6622,6652,6678,6786,6860,6861,6898,7273,7781,8437,9076,9362,9536,9633,10242,27132,27345,51760,55532,57699,79085,79901,84059,84557,121278,140576,144402,221184,341359,387758,728294	ADCY7,ANXA11,AQP1,AQP3,AQP9,ASS1,BAD,CALM3,CAMK2D,ENTPD6,CRHBP,NQO1,DLG2,EDN1,FBP1,GLRA2,GSS,GUCA1A,HPCA,ICAM1,ITPKB,JUN,KCNK3,MAOB,MT1A,MT1B,MT1E,MT1F,MT1G,MT1H,MT1M,MT1X,MT2A,OGG1,SERPINF1,PKLR,PRKAA2,MAPK1,MAPK3,RYR1,RYR3,S100A13,SMPD1,SNCA,SORD,SPARC,STIM1,SYT4,SYT5,TAT,TTN,SLC30A3,RASAL1,CLDN1,CPNE6,PTGES,TESMIN,KCNMB2,CPNE7,KCNMB4,SYT17,SLC30A10,CPNE5,SLC25A23,CYBRD1,ADGRV1,MAP1LC3A,TPH2,S1…
14_Member	GO Biological Processes	GO:0071248	cellular response to metal ion	-8.94409	-6.54422	48/189	113,358,817,1393,1728,1740,1906,2203,2742,2978,3208,3707,3725,3777,4489,4490,4493,4494,4495,4496,4499,4501,4502,4968,5176,5563,5594,5595,6261,6263,6609,6622,6860,6861,8437,9076,9362,27132,51760,55532,57699,79085,84059,84557,121278,144402,221184,341359	ADCY7,AQP1,CAMK2D,CRHBP,NQO1,DLG2,EDN1,FBP1,GLRA2,GUCA1A,HPCA,ITPKB,JUN,KCNK3,MT1A,MT1B,MT1E,MT1F,MT1G,MT1H,MT1M,MT1X,MT2A,OGG1,SERPINF1,PRKAA2,MAPK1,MAPK3,RYR1,RYR3,SMPD1,SNCA,SYT4,SYT5,RASAL1,CLDN1,CPNE6,CPNE7,SYT17,SLC30A10,CPNE5,SLC25A23,ADGRV1,MAP1LC3A,TPH2,CPNE8,CPNE2,SYT10
14_Member	GO Biological Processes	GO:0071241	cellular response to inorganic substance	-8.74177	-6.39147	52/216	113,358,572,641,817,1017,1393,1728,1740,1906,2203,2742,2978,3208,3707,3725,3777,4489,4490,4493,4494,4495,4496,4499,4501,4502,4968,5176,5563,5594,5595,6261,6263,6609,6622,6860,6861,8437,9076,9362,11277,27132,51760,55532,57699,79085,84059,84557,121278,144402,221184,341359	ADCY7,AQP1,BAD,BLM,CAMK2D,CDK2,CRHBP,NQO1,DLG2,EDN1,FBP1,GLRA2,GUCA1A,HPCA,ITPKB,JUN,KCNK3,MT1A,MT1B,MT1E,MT1F,MT1G,MT1H,MT1M,MT1X,MT2A,OGG1,SERPINF1,PRKAA2,MAPK1,MAPK3,RYR1,RYR3,SMPD1,SNCA,SYT4,SYT5,RASAL1,CLDN1,CPNE6,TREX1,CPNE7,SYT17,SLC30A10,CPNE5,SLC25A23,ADGRV1,MAP1LC3A,TPH2,CPNE8,CPNE2,SYT10
14_Member	GO Biological Processes	GO:0051592	response to calcium ion	-6.54366	-4.53694	36/146	311,360,572,808,817,955,1393,1906,2978,3208,3707,5563,6261,6263,6609,6678,6786,6860,6861,7273,8437,9362,9536,10242,27132,27345,51760,57699,79085,84059,121278,140576,144402,221184,341359,728294	ANXA11,AQP3,BAD,CALM3,CAMK2D,ENTPD6,CRHBP,EDN1,GUCA1A,HPCA,ITPKB,PRKAA2,RYR1,RYR3,SMPD1,SPARC,STIM1,SYT4,SYT5,TTN,RASAL1,CPNE6,PTGES,KCNMB2,CPNE7,KCNMB4,SYT17,CPNE5,SLC25A23,ADGRV1,TPH2,S100A16,CPNE8,CPNE2,SYT10,D2HGDH
14_Member	GO Biological Processes	GO:0071277	cellular response to calcium ion	-4.87205	-3.16345	22/82	817,1393,1906,2978,3208,3707,5563,6261,6263,6609,6860,6861,8437,9362,27132,51760,57699,79085,84059,144402,221184,341359	CAMK2D,CRHBP,EDN1,GUCA1A,HPCA,ITPKB,PRKAA2,RYR1,RYR3,SMPD1,SYT4,SYT5,RASAL1,CPNE6,CPNE7,SYT17,CPNE5,SLC25A23,ADGRV1,CPNE8,CPNE2,SYT10
15_Summary	Reactome Gene Sets	R-HSA-109582	Hemostasis	-12.1941	-9.32651	121/620	1,2,12,87,409,482,489,493,547,808,832,948,967,1017,1020,1062,1445,1525,1606,1607,1675,2161,2316,2534,2734,2768,2771,2783,2786,2812,2817,2888,2982,2994,3046,3047,3048,3265,3479,3796,3835,3897,4067,4097,4267,4282,4602,5026,5055,5138,5155,5196,5271,5296,5525,5580,5582,5592,5594,5595,5624,5657,5777,5874,5890,5908,6281,6385,6464,6520,6543,6678,6786,7010,7076,7078,7114,7273,7277,7280,7409,7423,7534,797…	A1BG,A2M,SERPINA3,ACTN1,ARRB2,ATP1B2,ATP2A3,ATP2B4,KIF1A,CALM3,CAPZB,CD36,CD63,CDK2,CDK5,CENPE,CSK,CXADR,DGKA,DGKB,CFD,F12,FLNA,FYN,GLG1,GNA12,GNAI2,GNB2,GNG4,GP1BB,GPC1,GRB14,GUCY1A1,GYPB,HBE1,HBG1,HBG2,HRAS,IGF1,KIF2A,KIF22,L1CAM,LYN,MAFG,CD99,MIF,MYB,P2RX5,SERPINB2,PDE2A,PDGFB,PF4,SERPINB8,PIK3R2,PPP2R5A,PRKCD,PRKCG,PRKG1,MAPK1,MAPK3,PROC,PRTN3,PTPN6,RAB27B,RAD51B,RAP1B,S100A10,SDC4,SHC1,SLC3A…
15_Member	Reactome Gene Sets	R-HSA-109582	Hemostasis	-12.1941	-9.32651	121/620	1,2,12,87,409,482,489,493,547,808,832,948,967,1017,1020,1062,1445,1525,1606,1607,1675,2161,2316,2534,2734,2768,2771,2783,2786,2812,2817,2888,2982,2994,3046,3047,3048,3265,3479,3796,3835,3897,4067,4097,4267,4282,4602,5026,5055,5138,5155,5196,5271,5296,5525,5580,5582,5592,5594,5595,5624,5657,5777,5874,5890,5908,6281,6385,6464,6520,6543,6678,6786,7010,7076,7078,7114,7273,7277,7280,7409,7423,7534,797…	A1BG,A2M,SERPINA3,ACTN1,ARRB2,ATP1B2,ATP2A3,ATP2B4,KIF1A,CALM3,CAPZB,CD36,CD63,CDK2,CDK5,CENPE,CSK,CXADR,DGKA,DGKB,CFD,F12,FLNA,FYN,GLG1,GNA12,GNAI2,GNB2,GNG4,GP1BB,GPC1,GRB14,GUCY1A1,GYPB,HBE1,HBG1,HBG2,HRAS,IGF1,KIF2A,KIF22,L1CAM,LYN,MAFG,CD99,MIF,MYB,P2RX5,SERPINB2,PDE2A,PDGFB,PF4,SERPINB8,PIK3R2,PPP2R5A,PRKCD,PRKCG,PRKG1,MAPK1,MAPK3,PROC,PRTN3,PTPN6,RAB27B,RAD51B,RAP1B,S100A10,SDC4,SHC1,SLC3A…
15_Member	Reactome Gene Sets	R-HSA-76002	Platelet activation, signaling and aggregation	-8.13785	-5.86885	58/263	1,2,12,87,409,808,948,967,1445,1606,1607,1675,2316,2534,2768,2771,2783,2786,2812,3479,4067,5155,5196,5296,5580,5582,5594,5595,5777,5874,5908,6464,6678,7076,7078,7114,7273,7277,7409,7423,7534,8407,9564,9948,10257,10487,10490,10672,11069,51706,54331,54518,55970,59345,64805,66005,78991,94121	A1BG,A2M,SERPINA3,ACTN1,ARRB2,CALM3,CD36,CD63,CSK,DGKA,DGKB,CFD,FLNA,FYN,GNA12,GNAI2,GNB2,GNG4,GP1BB,IGF1,LYN,PDGFB,PF4,PIK3R2,PRKCD,PRKCG,MAPK1,MAPK3,PTPN6,RAB27B,RAP1B,SHC1,SPARC,TIMP1,TIMP3,TMSB4X,TTN,TUBA4A,VAV1,VEGFB,YWHAZ,TAGLN2,BCAR1,WDR1,ABCC4,CAP1,VTI1B,GNA13,RAPGEF4,CYB5R1,GNG2,APBB1IP,GNG12,GNB4,P2RY12,CHID1,PCYOX1L,SYTL4
15_Member	Reactome Gene Sets	R-HSA-76005	Response to elevated platelet cytosolic Ca2+	-4.67572	-3.00256	30/134	1,2,12,87,808,948,967,1675,2316,3479,5155,5196,5582,5874,6678,7076,7078,7114,7273,7277,7423,8407,9948,10257,10487,10490,51706,66005,78991,94121	A1BG,A2M,SERPINA3,ACTN1,CALM3,CD36,CD63,CFD,FLNA,IGF1,PDGFB,PF4,PRKCG,RAB27B,SPARC,TIMP1,TIMP3,TMSB4X,TTN,TUBA4A,VEGFB,TAGLN2,WDR1,ABCC4,CAP1,VTI1B,CYB5R1,CHID1,PCYOX1L,SYTL4
15_Member	Reactome Gene Sets	R-HSA-114608	Platelet degranulation	-4.5772	-2.92501	29/129	1,2,12,87,808,948,967,1675,2316,3479,5155,5196,5874,6678,7076,7078,7114,7273,7277,7423,8407,9948,10257,10487,10490,51706,66005,78991,94121	A1BG,A2M,SERPINA3,ACTN1,CALM3,CD36,CD63,CFD,FLNA,IGF1,PDGFB,PF4,RAB27B,SPARC,TIMP1,TIMP3,TMSB4X,TTN,TUBA4A,VEGFB,TAGLN2,WDR1,ABCC4,CAP1,VTI1B,CYB5R1,CHID1,PCYOX1L,SYTL4
15_Member	GO Biological Processes	GO:0002576	platelet degranulation	-4.21724	-2.63571	28/128	1,2,12,87,948,967,1675,2316,3479,4067,5155,5196,5874,6678,7076,7078,7114,7273,7277,7423,8407,9948,10257,10490,51706,66005,78991,94121	A1BG,A2M,SERPINA3,ACTN1,CD36,CD63,CFD,FLNA,IGF1,LYN,PDGFB,PF4,RAB27B,SPARC,TIMP1,TIMP3,TMSB4X,TTN,TUBA4A,VEGFB,TAGLN2,WDR1,ABCC4,VTI1B,CYB5R1,CHID1,PCYOX1L,SYTL4
16_Summary	GO Biological Processes	GO:0008610	lipid biosynthetic process	-11.5563	-8.75371	135/734	21,31,33,37,190,215,247,341,348,377,1460,1565,1583,1589,1606,1607,1717,1727,1906,2055,2170,2171,2222,2224,2232,2247,2583,2629,2879,2946,3028,3156,3157,3248,3358,3553,3631,3692,3992,3995,4282,4534,4597,5106,5155,5281,5293,5296,5465,5563,5580,5587,6305,6307,6591,6609,6610,6713,7108,7421,7923,8309,8613,8630,8703,8707,8818,8897,9091,9215,9256,9362,9415,9536,9791,10005,10062,10400,10449,10554,10555,10…	ABCA3,ACACA,ACADL,ACADVL,NR0B1,ABCD1,ALOX15B,APOC1,APOE,ARF3,CSNK2B,CYP2D6,CYP11A1,CYP21A2,DGKA,DGKB,DHCR7,CYB5R3,EDN1,CLN8,FABP3,FABP5,FDFT1,FDPS,FDXR,FGF2,B4GALNT1,GBA,GPX4,GSTM2,HSD17B10,HMGCR,HMGCS1,HPGD,HTR2C,IL1B,INPP4A,EIF6,FADS1,FADS3,MIF,MTM1,MVD,PCK2,PDGFB,PIGF,PIK3CD,PIK3R2,PPARA,PRKAA2,PRKCD,PRKD1,SBF1,MSMO1,SNAI2,SMPD1,SMPD2,SQLE,TM7SF2,VDR,HSD17B8,ACOX2,PLPP3,HSD17B6,B4GALT3,B3GALT2…
16_Member	GO Biological Processes	GO:0008610	lipid biosynthetic process	-11.5563	-8.75371	135/734	21,31,33,37,190,215,247,341,348,377,1460,1565,1583,1589,1606,1607,1717,1727,1906,2055,2170,2171,2222,2224,2232,2247,2583,2629,2879,2946,3028,3156,3157,3248,3358,3553,3631,3692,3992,3995,4282,4534,4597,5106,5155,5281,5293,5296,5465,5563,5580,5587,6305,6307,6591,6609,6610,6713,7108,7421,7923,8309,8613,8630,8703,8707,8818,8897,9091,9215,9256,9362,9415,9536,9791,10005,10062,10400,10449,10554,10555,10…	ABCA3,ACACA,ACADL,ACADVL,NR0B1,ABCD1,ALOX15B,APOC1,APOE,ARF3,CSNK2B,CYP2D6,CYP11A1,CYP21A2,DGKA,DGKB,DHCR7,CYB5R3,EDN1,CLN8,FABP3,FABP5,FDFT1,FDPS,FDXR,FGF2,B4GALNT1,GBA,GPX4,GSTM2,HSD17B10,HMGCR,HMGCS1,HPGD,HTR2C,IL1B,INPP4A,EIF6,FADS1,FADS3,MIF,MTM1,MVD,PCK2,PDGFB,PIGF,PIK3CD,PIK3R2,PPARA,PRKAA2,PRKCD,PRKD1,SBF1,MSMO1,SNAI2,SMPD1,SMPD2,SQLE,TM7SF2,VDR,HSD17B8,ACOX2,PLPP3,HSD17B6,B4GALT3,B3GALT2…
16_Member	Reactome Gene Sets	R-HSA-556833	Metabolism of lipids	-10.0645	-7.50497	131/740	31,33,35,37,215,247,377,590,948,1460,1565,1583,1589,1622,1717,2170,2171,2173,2222,2224,2232,2583,2629,2879,3033,3073,3155,3156,3157,3248,3631,3992,4199,4534,4597,4862,5019,5293,5296,5445,5446,5465,5563,5587,5920,6305,6307,6576,6604,6609,6610,6613,6713,7108,7329,7421,7923,8029,8309,8310,8613,8681,8706,8897,9256,9362,9415,9536,9791,9862,9871,10005,10025,10062,10400,10449,10554,10555,10654,10682,108…	ACACA,ACADL,ACADS,ACADVL,ABCD1,ALOX15B,ARF3,BCHE,CD36,CSNK2B,CYP2D6,CYP11A1,CYP21A2,DBI,DHCR7,FABP3,FABP5,FABP7,FDFT1,FDPS,FDXR,B4GALNT1,GBA,GPX4,HADH,HEXA,HMGCL,HMGCR,HMGCS1,HPGD,INPP4A,FADS1,ME1,MTM1,MVD,NPAS2,OXCT1,PIK3CD,PIK3R2,PON2,PON3,PPARA,PRKAA2,PRKD1,PLAAT4,SBF1,MSMO1,SLC25A1,SMARCD3,SMPD1,SMPD2,SUMO2,SQLE,TM7SF2,UBE2I,VDR,HSD17B8,CUBN,ACOX2,ACOX3,PLPP3,JMJD7-PLA2G4B,B3GALNT1,MTMR3,TSPO…
16_Member	GO Biological Processes	GO:0090407	organophosphate biosynthetic process	-7.29672	-5.14733	115/693	31,113,203,205,229,318,353,377,527,1460,1606,1607,1635,1716,2023,2170,2171,2203,2224,2247,2639,2978,2982,2987,3099,3157,3208,3269,3358,3418,3479,3607,3631,3692,3707,3939,3992,4199,4534,4597,4878,4923,5031,5155,5164,5232,5281,5293,5296,5313,5465,5471,5563,5594,5836,6305,6576,6622,6652,7114,7372,7415,7923,8480,8671,8818,8897,9091,9362,9519,9551,9791,10400,10554,10555,10654,11277,22845,26471,27132,2…	ACACA,ADCY7,AK1,AK4,ALDOB,NUDT2,APRT,ARF3,ATP6V0C,CSNK2B,DGKA,DGKB,DCTD,DGUOK,ENO1,FABP3,FABP5,FBP1,FDPS,FGF2,GCDH,GUCA1A,GUCY1A1,GUK1,HK2,HMGCS1,HPCA,HRH1,HTR2C,IDH2,IGF1,FOXK2,INPP4A,EIF6,ITPKB,LDHA,FADS1,ME1,MTM1,MVD,NPPA,NTSR1,P2RY6,PDGFB,PDK2,PGK2,PIGF,PIK3CD,PIK3R2,PKLR,PPARA,PPAT,PRKAA2,MAPK1,PYGL,SBF1,SLC25A1,SNCA,SORD,TMSB4X,UMPS,VCP,HSD17B8,RAE1,SLC4A4,DPM2,MTMR3,PIGQ,CPNE6,TBPL1,ATP5MF…
16_Member	GO Biological Processes	GO:0006644	phospholipid metabolic process	-7.06835	-4.96712	83/458	21,247,341,377,887,975,1460,1606,1607,1622,2055,2170,2171,2222,2224,2247,2261,2879,3157,3358,3631,3707,3992,4067,4534,4597,5155,5156,5281,5293,5296,5330,5580,5587,5920,6305,6609,6610,7010,8613,8811,8818,8897,9091,9362,9651,9711,9791,10062,10400,10554,10555,10654,22845,22979,27132,27315,51477,55224,57110,57153,57605,57664,64805,64850,79143,79644,80055,80339,83394,84513,93210,114882,126969,129642,1…	ABCA3,ALOX15B,APOC1,ARF3,CCKBR,CD81,CSNK2B,DGKA,DGKB,DBI,CLN8,FABP3,FABP5,FDFT1,FDPS,FGF2,FGFR3,GPX4,HMGCS1,HTR2C,INPP4A,ITPKB,FADS1,LYN,MTM1,MVD,PDGFB,PDGFRA,PIGF,PIK3CD,PIK3R2,PLCB2,PRKCD,PRKD1,PLAAT4,SBF1,SMPD1,SMPD2,TEK,PLPP3,GALR2,DPM2,MTMR3,PIGQ,CPNE6,PLCH2,RUBCN,PTDSS1,NR1H3,PEMT,AGPAT1,AGPAT2,PMVK,DOLK,EFR3B,CPNE7,PGAP2,ISYNA1,ETNK2,PLAAT1,SLC44A2,PITPNM2,PLEKHA4,P2RY12,ETNPPL,MBOAT7,SRD5…
16_Member	GO Biological Processes	GO:0008654	phospholipid biosynthetic process	-4.12143	-2.56393	48/271	377,1460,1606,1607,2170,2171,2224,2247,3157,3358,3631,3992,4534,4597,5155,5281,5293,5296,6305,8818,8897,9091,9362,9791,10400,10554,10555,10654,22845,27132,27315,51477,55224,57153,57605,57664,64850,79143,79644,80055,80339,83394,93210,126969,129642,200879,201164,221395	ARF3,CSNK2B,DGKA,DGKB,FABP3,FABP5,FDPS,FGF2,HMGCS1,HTR2C,INPP4A,FADS1,MTM1,MVD,PDGFB,PIGF,PIK3CD,PIK3R2,SBF1,DPM2,MTMR3,PIGQ,CPNE6,PTDSS1,PEMT,AGPAT1,AGPAT2,PMVK,DOLK,CPNE7,PGAP2,ISYNA1,ETNK2,SLC44A2,PITPNM2,PLEKHA4,ETNPPL,MBOAT7,SRD5A3,PGAP1,PNPLA3,PITPNM3,PGAP3,SLC44A3,MBOAT2,LIPH,PLD6,ADGRF5
16_Member	GO Biological Processes	GO:0006650	glycerophospholipid metabolic process	-3.05793	-1.74707	54/348	21,341,377,1460,1606,1607,1622,2170,2171,2247,3358,3631,3707,4534,5155,5281,5293,5296,5330,5920,6305,8811,8818,8897,9091,9362,9651,9791,10062,10400,10554,10555,22979,27132,27315,55224,57110,57153,57605,57664,64850,79143,80055,80339,83394,93210,114882,126969,129642,140701,151056,200879,201164,284486	ABCA3,APOC1,ARF3,CSNK2B,DGKA,DGKB,DBI,FABP3,FABP5,FGF2,HTR2C,INPP4A,ITPKB,MTM1,PDGFB,PIGF,PIK3CD,PIK3R2,PLCB2,PLAAT4,SBF1,GALR2,DPM2,MTMR3,PIGQ,CPNE6,PLCH2,PTDSS1,NR1H3,PEMT,AGPAT1,AGPAT2,EFR3B,CPNE7,PGAP2,ETNK2,PLAAT1,SLC44A2,PITPNM2,PLEKHA4,ETNPPL,MBOAT7,PGAP1,PNPLA3,PITPNM3,PGAP3,OSBPL8,SLC44A3,MBOAT2,ABHD16B,PLB1,LIPH,PLD6,THEM5
16_Member	Reactome Gene Sets	R-HSA-1483206	Glycerophospholipid biosynthesis	-2.99894	-1.70871	25/129	590,1460,5920,8681,9362,9791,10400,10554,10555,23646,27132,55224,57110,57153,57605,64850,79143,80339,83394,114882,126969,129642,151056,200879,201164	BCHE,CSNK2B,PLAAT4,JMJD7-PLA2G4B,CPNE6,PTDSS1,PEMT,AGPAT1,AGPAT2,PLD3,CPNE7,ETNK2,PLAAT1,SLC44A2,PITPNM2,ETNPPL,MBOAT7,PNPLA3,PITPNM3,OSBPL8,SLC44A3,MBOAT2,PLB1,LIPH,PLD6
16_Member	GO Biological Processes	GO:0046474	glycerophospholipid biosynthetic process	-2.84755	-1.59517	38/229	377,1460,1606,1607,2170,2171,2247,3358,3631,4534,5155,5281,5293,5296,6305,8818,8897,9091,9362,9791,10400,10554,10555,27132,27315,55224,57153,57605,57664,64850,79143,80055,80339,83394,93210,126969,200879,201164	ARF3,CSNK2B,DGKA,DGKB,FABP3,FABP5,FGF2,HTR2C,INPP4A,MTM1,PDGFB,PIGF,PIK3CD,PIK3R2,SBF1,DPM2,MTMR3,PIGQ,CPNE6,PTDSS1,PEMT,AGPAT1,AGPAT2,CPNE7,PGAP2,ETNK2,SLC44A2,PITPNM2,PLEKHA4,ETNPPL,MBOAT7,PGAP1,PNPLA3,PITPNM3,PGAP3,SLC44A3,LIPH,PLD6
16_Member	Reactome Gene Sets	R-HSA-1483257	Phospholipid metabolism	-2.63253	-1.43034	35/212	377,590,1460,3631,4534,5293,5296,5920,6305,8681,8897,9362,9791,10400,10554,10555,23646,27132,55224,57110,57153,57605,57664,64850,79143,80339,81846,83394,114882,126282,126969,129642,151056,200879,201164	ARF3,BCHE,CSNK2B,INPP4A,MTM1,PIK3CD,PIK3R2,PLAAT4,SBF1,JMJD7-PLA2G4B,MTMR3,CPNE6,PTDSS1,PEMT,AGPAT1,AGPAT2,PLD3,CPNE7,ETNK2,PLAAT1,SLC44A2,PITPNM2,PLEKHA4,ETNPPL,MBOAT7,PNPLA3,SBF2,PITPNM3,OSBPL8,TNFAIP8L1,SLC44A3,MBOAT2,PLB1,LIPH,PLD6
16_Member	GO Biological Processes	GO:0045017	glycerolipid biosynthetic process	-2.35815	-1.23237	41/268	377,1460,1606,1607,2170,2171,2247,3358,3631,4534,5106,5155,5281,5293,5296,6305,8818,8897,9091,9362,9791,10062,10400,10554,10555,10677,27132,27315,55224,57153,57605,57664,64850,79143,80055,80339,83394,93210,126969,200879,201164	ARF3,CSNK2B,DGKA,DGKB,FABP3,FABP5,FGF2,HTR2C,INPP4A,MTM1,PCK2,PDGFB,PIGF,PIK3CD,PIK3R2,SBF1,DPM2,MTMR3,PIGQ,CPNE6,PTDSS1,NR1H3,PEMT,AGPAT1,AGPAT2,AVIL,CPNE7,PGAP2,ETNK2,SLC44A2,PITPNM2,PLEKHA4,ETNPPL,MBOAT7,PGAP1,PNPLA3,PITPNM3,PGAP3,SLC44A3,LIPH,PLD6
17_Summary	GO Biological Processes	GO:0030029	actin filament-based process	-11.3998	-8.62549	142/789	71,87,120,358,389,395,396,399,684,752,817,822,832,881,1020,1266,1490,1525,1756,1809,1906,2044,2059,2195,2275,2316,2697,2764,2824,3265,3383,3693,3728,3781,3784,3925,4082,4088,4192,4542,4604,4625,4637,4647,4916,4983,5156,5580,5592,5734,5872,5987,6281,6385,6464,6640,6711,6712,7010,7114,7137,7138,7170,7184,7273,7430,7431,8470,8557,9051,9168,9535,9564,9948,9992,10006,10092,10093,10096,10109,10178,1045…	ACTG1,ACTN1,ADD3,AQP1,RHOC,ARHGAP6,ARHGDIA,RHOH,BST2,FMNL1,CAMK2D,CAPG,CAPZB,CCIN,CDK5,CNN3,CCN2,CXADR,DMD,DPYSL3,EDN1,EPHA5,EPS8,FAT1,FHL3,FLNA,GJA1,GMFB,GPM6B,HRAS,ICAM1,ITGB5,JUP,KCNN2,KCNQ1,STMN1,MARCKS,SMAD3,MDK,MYO1F,MYBPC1,MYH7,MYL6,MYO7A,NTRK3,OPHN1,PDGFRA,PRKCD,PRKG1,PTGER4,RAB13,TRIM27,S100A10,SDC4,SHC1,SNTA1,SPTBN1,SPTBN2,TEK,TMSB4X,TNNI3,TNNT1,TPM3,HSP90B1,TTN,EZR,VIM,SORBS2,TCAP,PSTP…
17_Member	GO Biological Processes	GO:0030029	actin filament-based process	-11.3998	-8.62549	142/789	71,87,120,358,389,395,396,399,684,752,817,822,832,881,1020,1266,1490,1525,1756,1809,1906,2044,2059,2195,2275,2316,2697,2764,2824,3265,3383,3693,3728,3781,3784,3925,4082,4088,4192,4542,4604,4625,4637,4647,4916,4983,5156,5580,5592,5734,5872,5987,6281,6385,6464,6640,6711,6712,7010,7114,7137,7138,7170,7184,7273,7430,7431,8470,8557,9051,9168,9535,9564,9948,9992,10006,10092,10093,10096,10109,10178,1045…	ACTG1,ACTN1,ADD3,AQP1,RHOC,ARHGAP6,ARHGDIA,RHOH,BST2,FMNL1,CAMK2D,CAPG,CAPZB,CCIN,CDK5,CNN3,CCN2,CXADR,DMD,DPYSL3,EDN1,EPHA5,EPS8,FAT1,FHL3,FLNA,GJA1,GMFB,GPM6B,HRAS,ICAM1,ITGB5,JUP,KCNN2,KCNQ1,STMN1,MARCKS,SMAD3,MDK,MYO1F,MYBPC1,MYH7,MYL6,MYO7A,NTRK3,OPHN1,PDGFRA,PRKCD,PRKG1,PTGER4,RAB13,TRIM27,S100A10,SDC4,SHC1,SNTA1,SPTBN1,SPTBN2,TEK,TMSB4X,TNNI3,TNNT1,TPM3,HSP90B1,TTN,EZR,VIM,SORBS2,TCAP,PSTP…
17_Member	GO Biological Processes	GO:0030036	actin cytoskeleton organization	-10.3541	-7.75106	126/696	71,87,120,358,389,395,396,399,684,752,822,832,881,1020,1266,1490,1525,1809,1906,2044,2059,2195,2275,2316,2764,2824,3265,3383,3693,3925,4082,4088,4192,4542,4647,4916,4983,5156,5580,5592,5734,5872,5987,6281,6385,6464,6711,6712,7010,7114,7138,7170,7184,7273,7430,8470,8557,9051,9168,9535,9564,9948,10006,10092,10093,10096,10109,10178,10458,10459,10487,10611,10677,10788,10979,11078,11133,11151,11170,11…	ACTG1,ACTN1,ADD3,AQP1,RHOC,ARHGAP6,ARHGDIA,RHOH,BST2,FMNL1,CAPG,CAPZB,CCIN,CDK5,CNN3,CCN2,CXADR,DPYSL3,EDN1,EPHA5,EPS8,FAT1,FHL3,FLNA,GMFB,GPM6B,HRAS,ICAM1,ITGB5,STMN1,MARCKS,SMAD3,MDK,MYO1F,MYO7A,NTRK3,OPHN1,PDGFRA,PRKCD,PRKG1,PTGER4,RAB13,TRIM27,S100A10,SDC4,SHC1,SPTBN1,SPTBN2,TEK,TMSB4X,TNNT1,TPM3,HSP90B1,TTN,EZR,SORBS2,TCAP,PSTPIP1,TMSB10,GMFG,BCAR1,WDR1,ABI1,ARPC5,ARPC4,ACTR3,ARPC2,TENM1,BAI…
17_Member	GO Biological Processes	GO:0051129	negative regulation of cellular component organization	-7.94902	-5.70739	129/782	120,341,348,393,395,396,409,822,832,869,899,952,1020,1063,1400,1445,1471,1716,1809,1948,1978,2059,2316,2534,2629,2764,3183,3300,3337,3479,3553,3925,4043,4134,4534,4751,4851,5580,5587,5657,5734,5764,5780,5793,5800,5909,6092,6418,6457,6585,6588,6622,6662,6711,6712,6860,6904,7013,7067,7114,7337,7411,7431,7533,8260,8326,8934,9168,9320,9531,9535,9711,9856,10040,10062,10449,10459,10493,10500,10501,1050…	ADD3,APOC1,APOE,ARHGAP4,ARHGAP6,ARHGDIA,ARRB2,CAPG,CAPZB,CBLN1,CCNF,CD38,CDK5,CENPF,CRMP1,CSK,CST3,DGUOK,DPYSL3,EFNB2,EIF4EBP1,EPS8,FLNA,FYN,GBA,GMFB,HNRNPC,DNAJB2,DNAJB1,IGF1,IL1B,STMN1,LRPAP1,MAP4,MTM1,NEK2,NOTCH1,PRKCD,PRKD1,PRTN3,PTGER4,PTN,PTPN9,PTPRG,PTPRO,RAP1GAP,ROBO2,SET,SH3GL3,SLIT1,SLN,SNCA,SOX9,SPTBN1,SPTBN2,SYT4,TBCD,TERF1,THRA,TMSB4X,UBE3A,VBP1,VIM,YWHAH,NAA10,FZD9,RAB29,TMSB10,TRIP…
17_Member	GO Biological Processes	GO:0097435	supramolecular fiber organization	-7.14278	-5.02192	117/713	71,87,120,165,348,389,395,399,631,822,832,948,1301,1471,1490,1809,1906,2059,2195,2280,2316,2670,2764,3383,3693,3796,3872,3925,4016,4082,4088,4534,4542,4647,5156,5300,5580,5734,5987,6281,6385,6423,6622,6711,6712,6904,7114,7138,7170,7184,7273,7411,7430,7431,8470,8557,9051,9168,9508,9535,9564,9948,10006,10092,10093,10096,10109,10178,10345,10458,10459,10519,10677,10788,10979,11078,11133,11151,11170,2…	ACTG1,ACTN1,ADD3,AEBP1,APOE,RHOC,ARHGAP6,RHOH,BFSP1,CAPG,CAPZB,CD36,COL11A1,CST3,CCN2,DPYSL3,EDN1,EPS8,FAT1,FKBP1A,FLNA,GFAP,GMFB,ICAM1,ITGB5,KIF2A,KRT17,STMN1,LOXL1,MARCKS,SMAD3,MTM1,MYO1F,MYO7A,PDGFRA,PIN1,PRKCD,PTGER4,TRIM27,S100A10,SDC4,SFRP2,SNCA,SPTBN1,SPTBN2,TBCD,TMSB4X,TNNT1,TPM3,HSP90B1,TTN,VBP1,EZR,VIM,SORBS2,TCAP,PSTPIP1,TMSB10,ADAMTS3,GMFG,BCAR1,WDR1,ABI1,ARPC5,ARPC4,ACTR3,ARPC2,TENM1…
17_Member	GO Biological Processes	GO:0044089	positive regulation of cellular component biogenesis	-6.69433	-4.67188	95/557	21,40,389,575,577,585,627,822,869,885,948,997,1307,1490,1809,1906,1981,2059,2316,2764,2823,2895,3265,3373,3383,3725,4088,4478,4915,5021,5064,5908,5987,6118,6281,6385,6622,6662,7010,7013,7099,7415,7476,7480,8655,9076,9148,9535,9750,9862,10025,10092,10093,10096,10109,10178,10273,10458,10677,10788,10923,10979,11151,22873,22919,22930,23379,23580,25940,27243,29109,51364,51504,51673,54361,54413,54869,5…	ABCA3,ASIC2,RHOC,ADGRB1,ADGRB3,BBS4,BDNF,CAPG,CBLN1,CCK,CD36,CDC34,COL16A1,CCN2,DPYSL3,EDN1,EIF4G1,EPS8,FLNA,GMFB,GPM6A,GRID2,HRAS,HYAL1,ICAM1,JUN,SMAD3,MSN,NTRK2,OXTR,PALM,RAP1B,TRIM27,RPA2,S100A10,SDC4,SNCA,SOX9,TEK,TERF1,TLR4,VCP,WNT7A,WNT10B,DYNLL1,CLDN1,NEURL1,GMFG,RIPOR2,MED24,MED16,ARPC5,ARPC4,ACTR3,ARPC2,TENM1,STUB1,BAIAP2,AVIL,IQGAP2,SUB1,FERMT2,CORO1A,DZIP1,MAPRE1,RAB3GAP1,ICE1,CDC42EP4…
17_Member	GO Biological Processes	GO:0051493	regulation of cytoskeleton organization	-6.33709	-4.36912	92/544	71,120,389,395,396,399,684,822,832,899,1020,1490,1906,2011,2044,2059,2316,2764,2824,3265,3383,3925,4088,4192,4751,4916,5119,5156,5563,5580,5594,5595,5734,5902,5987,6281,6385,6622,6711,6712,6904,7010,7114,7430,8480,9168,9535,9948,10092,10093,10096,10109,10178,10458,10519,10677,10788,10979,11078,11151,11170,22809,22919,22974,23580,23671,25999,27243,29085,29109,50861,50944,54361,55201,55521,55845,55…	ACTG1,ADD3,RHOC,ARHGAP6,ARHGDIA,RHOH,BST2,CAPG,CAPZB,CCNF,CDK5,CCN2,EDN1,MARK2,EPHA5,EPS8,FLNA,GMFB,GPM6B,HRAS,ICAM1,STMN1,SMAD3,MDK,NEK2,NTRK3,CHMP1A,PDGFRA,PRKAA2,PRKCD,MAPK1,MAPK3,PTGER4,RANBP1,TRIM27,S100A10,SDC4,SNCA,SPTBN1,SPTBN2,TBCD,TEK,TMSB4X,EZR,RAE1,TMSB10,GMFG,WDR1,ARPC5,ARPC4,ACTR3,ARPC2,TENM1,BAIAP2,CIB1,AVIL,IQGAP2,FERMT2,TRIOBP,CORO1A,FAM107A,ATF5,MAPRE1,TPX2,CDC42EP4,TMEFF2,CLIP3…
17_Member	GO Biological Processes	GO:0007015	actin filament organization	-6.14955	-4.21389	77/436	71,87,120,389,395,399,822,832,1490,1809,2059,2195,2316,2764,3383,3693,3925,4082,4088,4542,4647,5580,5734,5987,6281,6385,6711,6712,7114,7170,7184,7273,7430,8470,8557,9051,9168,9535,9564,9948,10006,10092,10093,10096,10109,10178,10458,10459,10677,10788,10979,11078,11133,11151,11170,23580,23671,29109,29993,50944,54361,54857,55845,63916,64780,64857,79778,79822,80206,81624,84687,85477,91663,94134,13631…	ACTG1,ACTN1,ADD3,RHOC,ARHGAP6,RHOH,CAPG,CAPZB,CCN2,DPYSL3,EPS8,FAT1,FLNA,GMFB,ICAM1,ITGB5,STMN1,MARCKS,SMAD3,MYO1F,MYO7A,PRKCD,PTGER4,TRIM27,S100A10,SDC4,SPTBN1,SPTBN2,TMSB4X,TPM3,HSP90B1,TTN,EZR,SORBS2,TCAP,PSTPIP1,TMSB10,GMFG,BCAR1,WDR1,ABI1,ARPC5,ARPC4,ACTR3,ARPC2,TENM1,BAIAP2,MAD2L2,AVIL,IQGAP2,FERMT2,TRIOBP,KPTN,CORO1A,FAM107A,CDC42EP4,TMEFF2,FHOD1,PACSIN1,SHANK1,WNT4,GDPD2,BRK1,ELMO2,MICAL1…
17_Member	GO Biological Processes	GO:0032956	regulation of actin cytoskeleton organization	-5.61597	-3.76895	64/353	71,120,389,395,396,399,684,822,832,1020,1490,1906,2044,2059,2316,2764,2824,3265,3383,3925,4088,4192,4916,5156,5580,5734,5987,6281,6385,6711,6712,7010,7114,7430,9168,9535,9948,10092,10093,10096,10109,10178,10458,10677,10788,10979,11078,11151,11170,23580,23671,29085,29109,50944,54361,55845,64857,79822,80206,85477,91663,91807,128272,136319	ACTG1,ADD3,RHOC,ARHGAP6,ARHGDIA,RHOH,BST2,CAPG,CAPZB,CDK5,CCN2,EDN1,EPHA5,EPS8,FLNA,GMFB,GPM6B,HRAS,ICAM1,STMN1,SMAD3,MDK,NTRK3,PDGFRA,PRKCD,PTGER4,TRIM27,S100A10,SDC4,SPTBN1,SPTBN2,TEK,TMSB4X,EZR,TMSB10,GMFG,WDR1,ARPC5,ARPC4,ACTR3,ARPC2,TENM1,BAIAP2,AVIL,IQGAP2,FERMT2,TRIOBP,CORO1A,FAM107A,CDC42EP4,TMEFF2,PHPT1,FHOD1,SHANK1,WNT4,BRK1,PLEKHG2,ARHGAP28,FHOD3,SCIN,MYADM,MYLK3,ARHGEF19,MTPN
17_Member	GO Biological Processes	GO:0051258	protein polymerization	-4.96857	-3.236	54/295	120,395,822,832,2059,2764,2879,3383,3925,4600,5300,5580,5987,6622,6711,6712,6904,7114,9051,9168,9535,10092,10093,10096,10109,10178,10458,10677,10788,11065,11078,11151,11170,22919,22974,23580,25999,27243,29082,51673,55845,64857,79778,79822,80206,81624,84282,85477,89795,91663,117854,125170,136319,221074	ADD3,ARHGAP6,CAPG,CAPZB,EPS8,GMFB,GPX4,ICAM1,STMN1,MX2,PIN1,PRKCD,TRIM27,SNCA,SPTBN1,SPTBN2,TBCD,TMSB4X,PSTPIP1,TMSB10,GMFG,ARPC5,ARPC4,ACTR3,ARPC2,TENM1,BAIAP2,AVIL,IQGAP2,UBE2C,TRIOBP,CORO1A,FAM107A,MAPRE1,TPX2,CDC42EP4,CLIP3,CHMP2A,CHMP4A,TPPP3,BRK1,PLEKHG2,MICALL2,ARHGAP28,FHOD3,DIAPH3,RNF135,SCIN,NAV3,MYADM,TRIM6,MIEF2,MTPN,SLC39A12
17_Member	GO Biological Processes	GO:0090066	regulation of anatomical structure size	-4.84932	-3.14651	80/495	40,120,147,154,348,358,361,393,624,627,822,832,952,1002,1020,1131,1816,1906,1910,2055,2059,2697,2764,2982,3269,3350,3363,3383,3897,4478,4878,5021,5580,5592,5865,5987,6640,6711,6712,7114,7409,7430,7476,9168,9535,9856,9948,10092,10093,10096,10109,10178,10242,10458,10500,10501,10505,10677,10788,11078,11151,23580,27345,51393,55845,57611,59342,64218,64857,79822,79890,80206,85477,91663,136319,143872,15…	ASIC2,ADD3,ADRA1B,ADRB2,APOE,AQP1,AQP4,ARHGAP4,BDKRB2,BDNF,CAPG,CAPZB,CD38,CDH4,CDK5,CHRM3,DRD5,EDN1,EDNRB,CLN8,EPS8,GJA1,GMFB,GUCY1A1,HRH1,HTR1A,HTR7,ICAM1,L1CAM,MSN,NPPA,OXTR,PRKCD,PRKG1,RAB3B,TRIM27,SNTA1,SPTBN1,SPTBN2,TMSB4X,VAV1,EZR,WNT7A,TMSB10,GMFG,KIAA0319,WDR1,ARPC5,ARPC4,ACTR3,ARPC2,TENM1,KCNMB2,BAIAP2,SEMA6C,SEMA6B,SEMA4F,AVIL,IQGAP2,TRIOBP,CORO1A,CDC42EP4,KCNMB4,TRPV2,BRK1,ISLR2,SCPEP…
17_Member	GO Biological Processes	GO:0043254	regulation of protein complex assembly	-4.69508	-3.01906	79/492	21,120,348,389,822,832,885,948,1978,1981,2059,2629,2670,2764,3383,3642,3725,3925,4478,5563,5580,5734,5908,5987,6118,6622,6662,6711,6712,6804,6904,7013,7067,7099,7114,7415,7480,9168,9535,9862,10025,10092,10093,10096,10109,10178,10273,10458,10677,10788,10923,10979,11078,11151,22919,23379,23493,23580,25999,51339,51451,51673,55364,55612,55845,57393,64805,64857,79822,79969,80206,85477,89795,91663,1363…	ABCA3,ADD3,APOE,RHOC,CAPG,CAPZB,CCK,CD36,EIF4EBP1,EIF4G1,EPS8,GBA,GFAP,GMFB,ICAM1,INSM1,JUN,STMN1,MSN,PRKAA2,PRKCD,PTGER4,RAP1B,TRIM27,RPA2,SNCA,SOX9,SPTBN1,SPTBN2,STX1A,TBCD,TERF1,THRA,TLR4,TMSB4X,VCP,WNT10B,TMSB10,GMFG,MED24,MED16,ARPC5,ARPC4,ACTR3,ARPC2,TENM1,STUB1,BAIAP2,AVIL,IQGAP2,SUB1,FERMT2,TRIOBP,CORO1A,MAPRE1,ICE1,HEY2,CDC42EP4,CLIP3,DACT1,LCMT1,TPPP3,IMPACT,FERMT1,BRK1,CLTRN,P2RY12,PLE…
17_Member	GO Biological Processes	GO:0032970	regulation of actin filament-based process	-4.56915	-2.91866	66/395	71,120,389,395,396,399,684,817,822,832,1020,1490,1906,2044,2059,2316,2764,2824,3265,3383,3728,3925,4088,4192,4916,5156,5580,5734,5987,6281,6385,6711,6712,7010,7114,7430,9168,9535,9948,10092,10093,10096,10109,10178,10458,10677,10788,10979,11078,11151,11170,23580,23671,29085,29109,50944,54361,55845,64857,79822,80206,85477,91663,91807,128272,136319	ACTG1,ADD3,RHOC,ARHGAP6,ARHGDIA,RHOH,BST2,CAMK2D,CAPG,CAPZB,CDK5,CCN2,EDN1,EPHA5,EPS8,FLNA,GMFB,GPM6B,HRAS,ICAM1,JUP,STMN1,SMAD3,MDK,NTRK3,PDGFRA,PRKCD,PTGER4,TRIM27,S100A10,SDC4,SPTBN1,SPTBN2,TEK,TMSB4X,EZR,TMSB10,GMFG,WDR1,ARPC5,ARPC4,ACTR3,ARPC2,TENM1,BAIAP2,AVIL,IQGAP2,FERMT2,TRIOBP,CORO1A,FAM107A,CDC42EP4,TMEFF2,PHPT1,FHOD1,SHANK1,WNT4,BRK1,PLEKHG2,ARHGAP28,FHOD3,SCIN,MYADM,MYLK3,ARHGEF19,MT…
17_Member	GO Biological Processes	GO:1902903	regulation of supramolecular fiber organization	-4.40596	-2.78663	62/369	71,120,165,348,389,395,822,832,1490,1906,2059,2316,2764,3383,3925,4088,5580,5734,5987,6281,6385,6622,6711,6712,6904,7114,7411,9168,9535,9948,10092,10093,10096,10109,10178,10458,10519,10677,10788,10979,11078,11151,22919,22974,23580,23671,25999,29109,30008,50944,54361,55201,55845,64857,79822,80206,85477,89795,91663,91807,136319,221074	ACTG1,ADD3,AEBP1,APOE,RHOC,ARHGAP6,CAPG,CAPZB,CCN2,EDN1,EPS8,FLNA,GMFB,ICAM1,STMN1,SMAD3,PRKCD,PTGER4,TRIM27,S100A10,SDC4,SNCA,SPTBN1,SPTBN2,TBCD,TMSB4X,VBP1,TMSB10,GMFG,WDR1,ARPC5,ARPC4,ACTR3,ARPC2,TENM1,BAIAP2,CIB1,AVIL,IQGAP2,FERMT2,TRIOBP,CORO1A,MAPRE1,TPX2,CDC42EP4,TMEFF2,CLIP3,FHOD1,EFEMP2,SHANK1,WNT4,MAP1S,BRK1,PLEKHG2,ARHGAP28,FHOD3,SCIN,NAV3,MYADM,MYLK3,MTPN,SLC39A12
17_Member	GO Biological Processes	GO:0031333	negative regulation of protein complex assembly	-4.21719	-2.63571	31/148	120,822,832,1978,2059,2629,3925,5580,5734,6622,6662,6711,6712,6904,7067,7114,9168,10677,11078,22919,23493,25999,51339,51451,55364,80206,85477,91663,136319,260434,550643	ADD3,CAPG,CAPZB,EIF4EBP1,EPS8,GBA,STMN1,PRKCD,PTGER4,SNCA,SOX9,SPTBN1,SPTBN2,TBCD,THRA,TMSB4X,TMSB10,AVIL,TRIOBP,MAPRE1,HEY2,CLIP3,DACT1,LCMT1,IMPACT,FHOD3,SCIN,MYADM,MTPN,PYDC1,NBDY
17_Member	GO Biological Processes	GO:0051494	negative regulation of cytoskeleton organization	-4.1948	-2.61837	33/162	120,395,822,832,899,2059,2764,3925,4751,5580,6622,6711,6712,6904,7114,9168,9535,10519,10677,11078,11151,22919,22974,23671,25999,27243,50944,79822,80206,85477,89795,91663,136319	ADD3,ARHGAP6,CAPG,CAPZB,CCNF,EPS8,GMFB,STMN1,NEK2,PRKCD,SNCA,SPTBN1,SPTBN2,TBCD,TMSB4X,TMSB10,GMFG,CIB1,AVIL,TRIOBP,CORO1A,MAPRE1,TPX2,TMEFF2,CLIP3,CHMP2A,SHANK1,ARHGAP28,FHOD3,SCIN,NAV3,MYADM,MTPN
17_Member	GO Biological Processes	GO:0032272	negative regulation of protein polymerization	-4.18107	-2.6082	20/78	120,822,832,2059,3925,5580,6622,6711,6712,6904,7114,9168,10677,11078,22919,25999,80206,85477,91663,136319	ADD3,CAPG,CAPZB,EPS8,STMN1,PRKCD,SNCA,SPTBN1,SPTBN2,TBCD,TMSB4X,TMSB10,AVIL,TRIOBP,MAPRE1,CLIP3,FHOD3,SCIN,MYADM,MTPN
17_Member	GO Biological Processes	GO:0008154	actin polymerization or depolymerization	-4.01077	-2.47676	40/215	120,395,822,832,2059,2764,3383,5580,5987,6711,6712,7114,9051,9168,9535,9948,10006,10092,10093,10096,10109,10178,10458,10677,10788,11078,11151,11170,23580,55845,64780,64857,79778,79822,80206,81624,84687,85477,91663,136319	ADD3,ARHGAP6,CAPG,CAPZB,EPS8,GMFB,ICAM1,PRKCD,TRIM27,SPTBN1,SPTBN2,TMSB4X,PSTPIP1,TMSB10,GMFG,WDR1,ABI1,ARPC5,ARPC4,ACTR3,ARPC2,TENM1,BAIAP2,AVIL,IQGAP2,TRIOBP,CORO1A,FAM107A,CDC42EP4,BRK1,MICAL1,PLEKHG2,MICALL2,ARHGAP28,FHOD3,DIAPH3,PPP1R9B,SCIN,MYADM,MTPN
17_Member	GO Biological Processes	GO:0030041	actin filament polymerization	-3.9335	-2.41282	36/188	120,395,822,832,2059,2764,3383,5580,5987,6711,6712,7114,9051,9168,9535,10092,10093,10096,10109,10178,10458,10677,10788,11078,11151,11170,23580,55845,64857,79778,79822,80206,81624,85477,91663,136319	ADD3,ARHGAP6,CAPG,CAPZB,EPS8,GMFB,ICAM1,PRKCD,TRIM27,SPTBN1,SPTBN2,TMSB4X,PSTPIP1,TMSB10,GMFG,ARPC5,ARPC4,ACTR3,ARPC2,TENM1,BAIAP2,AVIL,IQGAP2,TRIOBP,CORO1A,FAM107A,CDC42EP4,BRK1,PLEKHG2,MICALL2,ARHGAP28,FHOD3,DIAPH3,SCIN,MYADM,MTPN
17_Member	GO Biological Processes	GO:1902904	negative regulation of supramolecular fiber organization	-3.87689	-2.37169	32/161	120,348,395,822,832,2059,2764,3925,5580,6622,6711,6712,6904,7114,7411,9168,9535,10519,10677,11078,11151,22919,22974,23671,25999,50944,79822,80206,85477,89795,91663,136319	ADD3,APOE,ARHGAP6,CAPG,CAPZB,EPS8,GMFB,STMN1,PRKCD,SNCA,SPTBN1,SPTBN2,TBCD,TMSB4X,VBP1,TMSB10,GMFG,CIB1,AVIL,TRIOBP,CORO1A,MAPRE1,TPX2,TMEFF2,CLIP3,SHANK1,ARHGAP28,FHOD3,SCIN,NAV3,MYADM,MTPN
17_Member	GO Biological Processes	GO:0110053	regulation of actin filament organization	-3.74808	-2.2717	47/273	71,120,389,395,822,832,1490,2059,2316,2764,3383,3925,4088,5580,5734,5987,6281,6385,6711,6712,7114,9168,9535,9948,10092,10093,10096,10109,10178,10458,10677,10788,10979,11078,11151,23580,23671,29109,50944,54361,55845,64857,79822,80206,85477,91663,136319	ACTG1,ADD3,RHOC,ARHGAP6,CAPG,CAPZB,CCN2,EPS8,FLNA,GMFB,ICAM1,STMN1,SMAD3,PRKCD,PTGER4,TRIM27,S100A10,SDC4,SPTBN1,SPTBN2,TMSB4X,TMSB10,GMFG,WDR1,ARPC5,ARPC4,ACTR3,ARPC2,TENM1,BAIAP2,AVIL,IQGAP2,FERMT2,TRIOBP,CORO1A,CDC42EP4,TMEFF2,FHOD1,SHANK1,WNT4,BRK1,PLEKHG2,ARHGAP28,FHOD3,SCIN,MYADM,MTPN
17_Member	GO Biological Processes	GO:0032535	regulation of cellular component size	-3.34982	-1.97319	58/370	120,348,358,361,393,627,822,832,1002,1020,1906,2055,2059,2764,3383,3897,4478,5580,5865,5987,6711,6712,7114,7409,7430,7476,9168,9535,9856,9948,10092,10093,10096,10109,10178,10458,10500,10501,10505,10677,10788,11078,11151,23580,51393,55845,57611,64218,64857,79822,79890,80206,85477,91663,136319,150465,223117,374946	ADD3,APOE,AQP1,AQP4,ARHGAP4,BDNF,CAPG,CAPZB,CDH4,CDK5,EDN1,CLN8,EPS8,GMFB,ICAM1,L1CAM,MSN,PRKCD,RAB3B,TRIM27,SPTBN1,SPTBN2,TMSB4X,VAV1,EZR,WNT7A,TMSB10,GMFG,KIAA0319,WDR1,ARPC5,ARPC4,ACTR3,ARPC2,TENM1,BAIAP2,SEMA6C,SEMA6B,SEMA4F,AVIL,IQGAP2,TRIOBP,CORO1A,CDC42EP4,TRPV2,BRK1,ISLR2,SEMA4A,PLEKHG2,ARHGAP28,RIN3,FHOD3,SCIN,MYADM,MTPN,TTL,SEMA3D,DRAXIN
17_Member	GO Biological Processes	GO:0032271	regulation of protein polymerization	-3.27814	-1.91967	39/225	120,822,832,2059,2764,3383,3925,5580,5987,6622,6711,6712,6904,7114,9168,9535,10092,10093,10096,10109,10178,10458,10677,10788,11078,11151,22919,23580,25999,51673,55845,64857,79822,80206,85477,89795,91663,136319,221074	ADD3,CAPG,CAPZB,EPS8,GMFB,ICAM1,STMN1,PRKCD,TRIM27,SNCA,SPTBN1,SPTBN2,TBCD,TMSB4X,TMSB10,GMFG,ARPC5,ARPC4,ACTR3,ARPC2,TENM1,BAIAP2,AVIL,IQGAP2,TRIOBP,CORO1A,MAPRE1,CDC42EP4,CLIP3,TPPP3,BRK1,PLEKHG2,ARHGAP28,FHOD3,SCIN,NAV3,MYADM,MTPN,SLC39A12
17_Member	GO Biological Processes	GO:0030833	regulation of actin filament polymerization	-3.14429	-1.81679	31/169	120,822,832,2059,2764,3383,5580,5987,6711,6712,7114,9168,9535,10092,10093,10096,10109,10178,10458,10677,10788,11078,11151,23580,55845,64857,79822,80206,85477,91663,136319	ADD3,CAPG,CAPZB,EPS8,GMFB,ICAM1,PRKCD,TRIM27,SPTBN1,SPTBN2,TMSB4X,TMSB10,GMFG,ARPC5,ARPC4,ACTR3,ARPC2,TENM1,BAIAP2,AVIL,IQGAP2,TRIOBP,CORO1A,CDC42EP4,BRK1,PLEKHG2,ARHGAP28,FHOD3,SCIN,MYADM,MTPN
17_Member	GO Biological Processes	GO:0030837	negative regulation of actin filament polymerization	-2.84802	-1.5953	15/64	120,822,832,2059,5580,6711,6712,7114,9168,10677,11078,80206,85477,91663,136319	ADD3,CAPG,CAPZB,EPS8,PRKCD,SPTBN1,SPTBN2,TMSB4X,TMSB10,AVIL,TRIOBP,FHOD3,SCIN,MYADM,MTPN
17_Member	GO Biological Processes	GO:0008064	regulation of actin polymerization or depolymerization	-2.78522	-1.54458	32/185	120,822,832,2059,2764,3383,5580,5987,6711,6712,7114,9168,9535,9948,10092,10093,10096,10109,10178,10458,10677,10788,11078,11151,23580,55845,64857,79822,80206,85477,91663,136319	ADD3,CAPG,CAPZB,EPS8,GMFB,ICAM1,PRKCD,TRIM27,SPTBN1,SPTBN2,TMSB4X,TMSB10,GMFG,WDR1,ARPC5,ARPC4,ACTR3,ARPC2,TENM1,BAIAP2,AVIL,IQGAP2,TRIOBP,CORO1A,CDC42EP4,BRK1,PLEKHG2,ARHGAP28,FHOD3,SCIN,MYADM,MTPN
17_Member	GO Biological Processes	GO:0030832	regulation of actin filament length	-2.74632	-1.51257	32/186	120,822,832,2059,2764,3383,5580,5987,6711,6712,7114,9168,9535,9948,10092,10093,10096,10109,10178,10458,10677,10788,11078,11151,23580,55845,64857,79822,80206,85477,91663,136319	ADD3,CAPG,CAPZB,EPS8,GMFB,ICAM1,PRKCD,TRIM27,SPTBN1,SPTBN2,TMSB4X,TMSB10,GMFG,WDR1,ARPC5,ARPC4,ACTR3,ARPC2,TENM1,BAIAP2,AVIL,IQGAP2,TRIOBP,CORO1A,CDC42EP4,BRK1,PLEKHG2,ARHGAP28,FHOD3,SCIN,MYADM,MTPN
17_Member	GO Biological Processes	GO:0051261	protein depolymerization	-2.73623	-1.50637	22/113	120,822,832,2059,3796,3925,6588,6711,6712,9948,10519,10677,11078,22974,50861,55201,64780,81551,84687,85477,89795,136319	ADD3,CAPG,CAPZB,EPS8,KIF2A,STMN1,SLN,SPTBN1,SPTBN2,WDR1,CIB1,AVIL,TRIOBP,TPX2,STMN3,MAP1S,MICAL1,STMN4,PPP1R9B,SCIN,NAV3,MTPN
17_Member	GO Biological Processes	GO:0010638	positive regulation of organelle organization	-2.7034	-1.47995	86/628	154,389,572,585,822,1020,1490,1736,1906,2316,2629,2764,3099,3265,3383,3479,3553,4088,4478,4487,4602,4751,4916,5155,5570,5587,5594,5595,5902,5987,6281,6385,6622,7010,7013,7159,7531,7533,7534,7936,8447,8655,8986,9141,9535,9948,10092,10093,10096,10109,10133,10178,10458,10788,10979,11065,11151,22873,22885,22919,22930,22948,23368,23580,25865,27141,29109,29117,51364,51529,51535,54361,54741,55737,55845,…	ADRB2,RHOC,BAD,BBS4,CAPG,CDK5,CCN2,DKC1,EDN1,FLNA,GBA,GMFB,HK2,HRAS,ICAM1,IGF1,IL1B,SMAD3,MSN,MSX1,MYB,NEK2,NTRK3,PDGFB,PKIB,PRKD1,MAPK1,MAPK3,RANBP1,TRIM27,S100A10,SDC4,SNCA,TEK,TERF1,TP53BP2,YWHAE,YWHAH,YWHAZ,NELFE,DOC2B,DYNLL1,RPS6KA4,PDCD5,GMFG,WDR1,ARPC5,ARPC4,ACTR3,ARPC2,OPTN,TENM1,BAIAP2,IQGAP2,FERMT2,UBE2C,CORO1A,DZIP1,ABLIM3,MAPRE1,RAB3GAP1,CCT5,PPP1R13B,CDC42EP4,PRKD2,CIDEB,FHOD1,BRD7,Z…
17_Member	GO Biological Processes	GO:0010639	negative regulation of organelle organization	-2.67905	-1.4619	61/419	120,395,409,822,832,899,1063,2059,2764,3183,3479,3925,4134,4534,4751,5580,6418,6622,6711,6712,6860,6904,7013,7114,8260,8326,9168,9320,9531,9535,10040,10449,10459,10493,10519,10677,11078,11151,22919,22974,23671,25999,26471,27243,29082,50944,51143,51451,54386,54998,55170,78990,79822,80169,80206,85477,89795,91663,136319,373861,550643	ADD3,ARHGAP6,ARRB2,CAPG,CAPZB,CCNF,CENPF,EPS8,GMFB,HNRNPC,IGF1,STMN1,MAP4,MTM1,NEK2,PRKCD,SET,SNCA,SPTBN1,SPTBN2,SYT4,TBCD,TERF1,TMSB4X,NAA10,FZD9,TMSB10,TRIP12,BAG3,GMFG,TOM1L1,ACAA2,MAD2L2,VAT1,CIB1,AVIL,TRIOBP,CORO1A,MAPRE1,TPX2,TMEFF2,CLIP3,NUPR1,CHMP2A,CHMP4A,SHANK1,DYNC1LI1,LCMT1,TERF2IP,AURKAIP1,PRMT6,OTUB2,ARHGAP28,CTC1,FHOD3,SCIN,NAV3,MYADM,MTPN,H1-9P,NBDY
17_Member	GO Biological Processes	GO:0031334	positive regulation of protein complex assembly	-2.53375	-1.35954	44/286	21,389,822,885,948,1981,2764,3383,3725,4478,5908,5987,6118,6622,7013,7099,7415,7480,9535,9862,10025,10092,10093,10096,10109,10178,10273,10458,10788,10923,10979,11151,22919,23379,23580,51673,55612,55845,57393,64805,79969,85477,89795,404672	ABCA3,RHOC,CAPG,CCK,CD36,EIF4G1,GMFB,ICAM1,JUN,MSN,RAP1B,TRIM27,RPA2,SNCA,TERF1,TLR4,VCP,WNT10B,GMFG,MED24,MED16,ARPC5,ARPC4,ACTR3,ARPC2,TENM1,STUB1,BAIAP2,IQGAP2,SUB1,FERMT2,CORO1A,MAPRE1,ICE1,CDC42EP4,TPPP3,FERMT1,BRK1,CLTRN,P2RY12,ATAT1,SCIN,NAV3,GTF2H5
17_Member	GO Biological Processes	GO:0051016	barbed-end actin filament capping	-2.51235	-1.34181	8/26	120,822,832,2059,10677,11078,85477,136319	ADD3,CAPG,CAPZB,EPS8,AVIL,TRIOBP,SCIN,MTPN
17_Member	GO Biological Processes	GO:0030042	actin filament depolymerization	-2.29433	-1.1895	13/59	120,822,832,2059,6711,6712,9948,10677,11078,64780,84687,85477,136319	ADD3,CAPG,CAPZB,EPS8,SPTBN1,SPTBN2,WDR1,AVIL,TRIOBP,MICAL1,PPP1R9B,SCIN,MTPN
17_Member	GO Biological Processes	GO:0051495	positive regulation of cytoskeleton organization	-2.27044	-1.17469	35/223	389,1020,1490,1906,2316,2764,3265,3383,4088,4916,5902,5987,6281,6385,7010,9535,9948,10092,10093,10096,10109,10178,10458,10788,10979,11151,22919,23580,29109,54361,55845,55968,85477,89795,91807	RHOC,CDK5,CCN2,EDN1,FLNA,GMFB,HRAS,ICAM1,SMAD3,NTRK3,RANBP1,TRIM27,S100A10,SDC4,TEK,GMFG,WDR1,ARPC5,ARPC4,ACTR3,ARPC2,TENM1,BAIAP2,IQGAP2,FERMT2,CORO1A,MAPRE1,CDC42EP4,FHOD1,WNT4,BRK1,NSFL1C,SCIN,NAV3,MYLK3
17_Member	GO Biological Processes	GO:0051693	actin filament capping	-2.19999	-1.11961	10/41	120,822,832,2059,6711,6712,10677,11078,85477,136319	ADD3,CAPG,CAPZB,EPS8,SPTBN1,SPTBN2,AVIL,TRIOBP,SCIN,MTPN
18_Summary	GO Biological Processes	GO:0072657	protein localization to membrane	-11.3933	-8.62549	124/658	163,348,493,572,784,808,975,1020,1363,1445,1740,2040,2064,2239,2262,2316,2319,2533,2534,2817,2898,2905,3208,3265,3695,3728,5064,5525,5727,5764,5780,5824,5865,5872,6136,6137,6154,6155,6157,6158,6159,6181,6191,6203,6204,6208,6222,6281,6449,6711,6804,6844,7159,7275,7430,7485,7531,7533,7534,8326,8642,8934,9141,9312,9379,9914,10082,10133,10490,10519,10858,10979,10981,11079,11187,11231,22930,22979,2304…	AP2B1,APOE,ATP2B4,BAD,CACNB3,CALM3,CD81,CDK5,CPE,CSK,DLG2,STOM,ERBB2,GPC4,GPC5,FLNA,FLOT2,FYB1,FYN,GPC1,GRIK2,GRIN2C,HPCA,HRAS,ITGB7,JUP,PALM,PPP2R5A,PTCH1,PTN,PTPN9,PEX19,RAB3B,RAB13,RPL12,RPL13,RPL26,RPL27,RPL27A,RPL28,RPL29,RPLP2,RPS4X,RPS9,RPS10,RPS14,RPS18,S100A10,SGTA,SPTBN1,STX1A,VAMP2,TP53BP2,TUB,EZR,GET1,YWHAE,YWHAH,YWHAZ,FZD9,DCHS1,RAB29,PDCD5,KCNB2,NRXN2,ATP2C2,GPC6,OPTN,VTI1B,CIB1,CYP…
18_Member	GO Biological Processes	GO:0072657	protein localization to membrane	-11.3933	-8.62549	124/658	163,348,493,572,784,808,975,1020,1363,1445,1740,2040,2064,2239,2262,2316,2319,2533,2534,2817,2898,2905,3208,3265,3695,3728,5064,5525,5727,5764,5780,5824,5865,5872,6136,6137,6154,6155,6157,6158,6159,6181,6191,6203,6204,6208,6222,6281,6449,6711,6804,6844,7159,7275,7430,7485,7531,7533,7534,8326,8642,8934,9141,9312,9379,9914,10082,10133,10490,10519,10858,10979,10981,11079,11187,11231,22930,22979,2304…	AP2B1,APOE,ATP2B4,BAD,CACNB3,CALM3,CD81,CDK5,CPE,CSK,DLG2,STOM,ERBB2,GPC4,GPC5,FLNA,FLOT2,FYB1,FYN,GPC1,GRIK2,GRIN2C,HPCA,HRAS,ITGB7,JUP,PALM,PPP2R5A,PTCH1,PTN,PTPN9,PEX19,RAB3B,RAB13,RPL12,RPL13,RPL26,RPL27,RPL27A,RPL28,RPL29,RPLP2,RPS4X,RPS9,RPS10,RPS14,RPS18,S100A10,SGTA,SPTBN1,STX1A,VAMP2,TP53BP2,TUB,EZR,GET1,YWHAE,YWHAH,YWHAZ,FZD9,DCHS1,RAB29,PDCD5,KCNB2,NRXN2,ATP2C2,GPC6,OPTN,VTI1B,CIB1,CYP…
18_Member	GO Biological Processes	GO:1990778	protein localization to cell periphery	-5.02352	-3.27951	58/323	493,784,975,1020,1445,2239,2316,2319,2533,2905,3265,3728,5064,5525,5727,5780,5865,5872,6281,6711,6844,7275,7430,8642,8934,9312,9914,10082,10133,10490,10519,11079,11187,22979,23043,23095,25945,25999,26088,26262,29993,55022,55690,55737,55800,56850,57628,64130,81619,83871,84687,89958,91663,160622,196383,254887,340348,353116	ATP2B4,CACNB3,CD81,CDK5,CSK,GPC4,FLNA,FLOT2,FYB1,GRIN2C,HRAS,JUP,PALM,PPP2R5A,PTCH1,PTPN9,RAB3B,RAB13,S100A10,SPTBN1,VAMP2,TUB,EZR,DCHS1,RAB29,KCNB2,ATP2C2,GPC6,OPTN,VTI1B,CIB1,RER1,PKP3,EFR3B,TNIK,KIF1B,NECTIN3,CLIP3,GGA1,TSPAN17,PACSIN1,PID1,PACS1,VPS35,SCN3B,GRIPAP1,DPP10,LIN7B,TSPAN14,RAB34,PPP1R9B,SAPCD2,MYADM,TAMALIN,RILPL2,ZDHHC23,TSPAN33,RILPL1
18_Member	GO Biological Processes	GO:0072659	protein localization to plasma membrane	-4.1791	-2.60765	49/277	493,784,975,1020,1445,2316,2319,2533,3728,5064,5525,5727,5780,5865,5872,6281,6711,6844,7430,8642,9312,9914,10133,10490,10519,11079,11187,22979,23043,25945,25999,26088,26262,29993,55022,55690,55737,55800,56850,57628,81619,83871,84687,91663,160622,196383,254887,340348,353116	ATP2B4,CACNB3,CD81,CDK5,CSK,FLNA,FLOT2,FYB1,JUP,PALM,PPP2R5A,PTCH1,PTPN9,RAB3B,RAB13,S100A10,SPTBN1,VAMP2,EZR,DCHS1,KCNB2,ATP2C2,OPTN,VTI1B,CIB1,RER1,PKP3,EFR3B,TNIK,NECTIN3,CLIP3,GGA1,TSPAN17,PACSIN1,PID1,PACS1,VPS35,SCN3B,GRIPAP1,DPP10,TSPAN14,RAB34,PPP1R9B,MYADM,TAMALIN,RILPL2,ZDHHC23,TSPAN33,RILPL1
19_Summary	GO Biological Processes	GO:0030003	cellular cation homeostasis	-10.962	-8.22636	122/653	116,147,187,212,348,475,482,489,493,527,528,537,624,784,793,794,799,808,817,858,887,948,952,1020,1230,1268,1756,1811,1816,1906,1910,2247,2280,2281,2512,2534,2697,2830,2840,2846,2898,2905,2911,2946,3062,3358,3777,3934,4067,4088,4097,4489,4490,4493,4494,4495,4496,4499,4501,4502,4923,5021,5026,5031,5156,5594,5595,5733,5734,5777,5788,6261,6263,6508,6543,6622,6786,7137,7184,7274,7337,7466,7531,7781,78…	ADCYAP1,ADRA1B,APLNR,ALAS2,APOE,ATOX1,ATP1B2,ATP2A3,ATP2B4,ATP6V0C,ATP6V1C1,ATP6AP1,BDKRB2,CACNB3,CALB1,CALB2,CALCR,CALM3,CAMK2D,CAV2,CCKBR,CD36,CD38,CDK5,CCR1,CNR1,DMD,SLC26A3,DRD5,EDN1,EDNRB,FGF2,FKBP1A,FKBP1B,FTL,FYN,GJA1,GPR6,GPR17,LPAR4,GRIK2,GRIN2C,GRM1,GSTM2,HCRTR2,HTR2C,KCNK3,LCN2,LYN,SMAD3,MAFG,MT1A,MT1B,MT1E,MT1F,MT1G,MT1H,MT1M,MT1X,MT2A,NTSR1,OXTR,P2RX5,P2RY6,PDGFRA,MAPK1,MAPK3,PTGER3,…
19_Member	GO Biological Processes	GO:0030003	cellular cation homeostasis	-10.962	-8.22636	122/653	116,147,187,212,348,475,482,489,493,527,528,537,624,784,793,794,799,808,817,858,887,948,952,1020,1230,1268,1756,1811,1816,1906,1910,2247,2280,2281,2512,2534,2697,2830,2840,2846,2898,2905,2911,2946,3062,3358,3777,3934,4067,4088,4097,4489,4490,4493,4494,4495,4496,4499,4501,4502,4923,5021,5026,5031,5156,5594,5595,5733,5734,5777,5788,6261,6263,6508,6543,6622,6786,7137,7184,7274,7337,7466,7531,7781,78…	ADCYAP1,ADRA1B,APLNR,ALAS2,APOE,ATOX1,ATP1B2,ATP2A3,ATP2B4,ATP6V0C,ATP6V1C1,ATP6AP1,BDKRB2,CACNB3,CALB1,CALB2,CALCR,CALM3,CAMK2D,CAV2,CCKBR,CD36,CD38,CDK5,CCR1,CNR1,DMD,SLC26A3,DRD5,EDN1,EDNRB,FGF2,FKBP1A,FKBP1B,FTL,FYN,GJA1,GPR6,GPR17,LPAR4,GRIK2,GRIN2C,GRM1,GSTM2,HCRTR2,HTR2C,KCNK3,LCN2,LYN,SMAD3,MAFG,MT1A,MT1B,MT1E,MT1F,MT1G,MT1H,MT1M,MT1X,MT2A,NTSR1,OXTR,P2RX5,P2RY6,PDGFRA,MAPK1,MAPK3,PTGER3,…
19_Member	GO Biological Processes	GO:0006873	cellular ion homeostasis	-10.7038	-8.00764	123/666	116,147,187,212,348,475,482,489,493,527,528,537,624,784,793,794,799,808,817,858,887,948,952,1020,1230,1268,1756,1811,1816,1906,1910,2247,2280,2281,2512,2534,2697,2830,2840,2846,2898,2905,2911,2946,3062,3358,3777,3934,4067,4088,4097,4489,4490,4493,4494,4495,4496,4499,4501,4502,4923,5021,5026,5031,5156,5167,5594,5595,5733,5734,5777,5788,6261,6263,6508,6543,6622,6786,7137,7184,7274,7337,7466,7531,77…	ADCYAP1,ADRA1B,APLNR,ALAS2,APOE,ATOX1,ATP1B2,ATP2A3,ATP2B4,ATP6V0C,ATP6V1C1,ATP6AP1,BDKRB2,CACNB3,CALB1,CALB2,CALCR,CALM3,CAMK2D,CAV2,CCKBR,CD36,CD38,CDK5,CCR1,CNR1,DMD,SLC26A3,DRD5,EDN1,EDNRB,FGF2,FKBP1A,FKBP1B,FTL,FYN,GJA1,GPR6,GPR17,LPAR4,GRIK2,GRIN2C,GRM1,GSTM2,HCRTR2,HTR2C,KCNK3,LCN2,LYN,SMAD3,MAFG,MT1A,MT1B,MT1E,MT1F,MT1G,MT1H,MT1M,MT1X,MT2A,NTSR1,OXTR,P2RX5,P2RY6,PDGFRA,ENPP1,MAPK1,MAPK3,P…
19_Member	GO Biological Processes	GO:0055080	cation homeostasis	-10.2505	-7.65498	130/728	116,147,187,212,348,475,482,489,493,527,528,537,624,784,793,794,799,808,817,858,887,948,952,1020,1230,1268,1756,1811,1816,1906,1910,2247,2280,2281,2512,2534,2697,2771,2830,2840,2846,2898,2905,2911,2946,3062,3358,3777,3934,4067,4088,4097,4489,4490,4493,4494,4495,4496,4499,4501,4502,4923,5021,5026,5031,5156,5164,5172,5594,5595,5733,5734,5777,5788,6261,6263,6332,6508,6543,6622,6786,7137,7184,7274,73…	ADCYAP1,ADRA1B,APLNR,ALAS2,APOE,ATOX1,ATP1B2,ATP2A3,ATP2B4,ATP6V0C,ATP6V1C1,ATP6AP1,BDKRB2,CACNB3,CALB1,CALB2,CALCR,CALM3,CAMK2D,CAV2,CCKBR,CD36,CD38,CDK5,CCR1,CNR1,DMD,SLC26A3,DRD5,EDN1,EDNRB,FGF2,FKBP1A,FKBP1B,FTL,FYN,GJA1,GNAI2,GPR6,GPR17,LPAR4,GRIK2,GRIN2C,GRM1,GSTM2,HCRTR2,HTR2C,KCNK3,LCN2,LYN,SMAD3,MAFG,MT1A,MT1B,MT1E,MT1F,MT1G,MT1H,MT1M,MT1X,MT2A,NTSR1,OXTR,P2RX5,P2RY6,PDGFRA,PDK2,SLC26A4,…
19_Member	GO Biological Processes	GO:0098771	inorganic ion homeostasis	-10.1453	-7.57169	131/738	116,147,187,212,348,475,482,489,493,527,528,537,624,784,793,794,799,808,817,858,887,948,952,1020,1230,1268,1756,1811,1816,1906,1910,2247,2280,2281,2512,2534,2697,2771,2830,2840,2846,2898,2905,2911,2946,3062,3358,3777,3934,4067,4088,4097,4489,4490,4493,4494,4495,4496,4499,4501,4502,4923,5021,5026,5031,5156,5164,5167,5172,5594,5595,5733,5734,5777,5788,6261,6263,6332,6508,6543,6622,6786,7137,7184,72…	ADCYAP1,ADRA1B,APLNR,ALAS2,APOE,ATOX1,ATP1B2,ATP2A3,ATP2B4,ATP6V0C,ATP6V1C1,ATP6AP1,BDKRB2,CACNB3,CALB1,CALB2,CALCR,CALM3,CAMK2D,CAV2,CCKBR,CD36,CD38,CDK5,CCR1,CNR1,DMD,SLC26A3,DRD5,EDN1,EDNRB,FGF2,FKBP1A,FKBP1B,FTL,FYN,GJA1,GNAI2,GPR6,GPR17,LPAR4,GRIK2,GRIN2C,GRM1,GSTM2,HCRTR2,HTR2C,KCNK3,LCN2,LYN,SMAD3,MAFG,MT1A,MT1B,MT1E,MT1F,MT1G,MT1H,MT1M,MT1X,MT2A,NTSR1,OXTR,P2RX5,P2RY6,PDGFRA,PDK2,ENPP1,SL…
19_Member	GO Biological Processes	GO:0006875	cellular metal ion homeostasis	-10.0095	-7.47485	108/573	116,147,187,212,348,475,482,489,493,537,624,784,793,794,799,808,817,858,887,948,952,1020,1230,1268,1756,1816,1906,1910,2247,2280,2281,2512,2534,2697,2830,2840,2846,2898,2905,2911,2946,3062,3358,3777,3934,4067,4088,4489,4490,4493,4494,4495,4496,4499,4501,4502,4923,5021,5026,5031,5156,5733,5734,5777,5788,6261,6263,6543,6622,6786,7137,7184,7466,7531,7781,7852,8326,8811,9114,9256,9633,9843,9914,10161…	ADCYAP1,ADRA1B,APLNR,ALAS2,APOE,ATOX1,ATP1B2,ATP2A3,ATP2B4,ATP6AP1,BDKRB2,CACNB3,CALB1,CALB2,CALCR,CALM3,CAMK2D,CAV2,CCKBR,CD36,CD38,CDK5,CCR1,CNR1,DMD,DRD5,EDN1,EDNRB,FGF2,FKBP1A,FKBP1B,FTL,FYN,GJA1,GPR6,GPR17,LPAR4,GRIK2,GRIN2C,GRM1,GSTM2,HCRTR2,HTR2C,KCNK3,LCN2,LYN,SMAD3,MT1A,MT1B,MT1E,MT1F,MT1G,MT1H,MT1M,MT1X,MT2A,NTSR1,OXTR,P2RX5,P2RY6,PDGFRA,PTGER3,PTGER4,PTPN6,PTPRC,RYR1,RYR3,SLC8A2,SNCA,S…
19_Member	GO Biological Processes	GO:0072503	cellular divalent inorganic cation homeostasis	-10.0054	-7.47485	95/481	116,147,187,348,489,493,624,784,793,794,799,808,817,858,887,948,952,1020,1230,1268,1756,1816,1906,1910,2247,2280,2281,2534,2697,2830,2840,2846,2898,2905,2911,2946,3062,3358,3777,4067,4088,4489,4490,4493,4494,4495,4496,4499,4501,4502,4923,5021,5026,5031,5156,5733,5734,5777,5788,6261,6263,6543,6622,6786,7137,7184,7466,7531,7781,7852,8326,8811,9256,9914,10161,10345,10518,10590,10672,11151,22953,2703…	ADCYAP1,ADRA1B,APLNR,APOE,ATP2A3,ATP2B4,BDKRB2,CACNB3,CALB1,CALB2,CALCR,CALM3,CAMK2D,CAV2,CCKBR,CD36,CD38,CDK5,CCR1,CNR1,DMD,DRD5,EDN1,EDNRB,FGF2,FKBP1A,FKBP1B,FYN,GJA1,GPR6,GPR17,LPAR4,GRIK2,GRIN2C,GRM1,GSTM2,HCRTR2,HTR2C,KCNK3,LYN,SMAD3,MT1A,MT1B,MT1E,MT1F,MT1G,MT1H,MT1M,MT1X,MT2A,NTSR1,OXTR,P2RX5,P2RY6,PDGFRA,PTGER3,PTGER4,PTPN6,PTPRC,RYR1,RYR3,SLC8A2,SNCA,STIM1,TNNI3,HSP90B1,WFS1,YWHAE,SLC30A…
19_Member	GO Biological Processes	GO:0072507	divalent inorganic cation homeostasis	-9.41218	-6.95636	96/500	116,147,187,348,489,493,624,784,793,794,799,808,817,858,887,948,952,1020,1230,1268,1756,1816,1906,1910,2247,2280,2281,2534,2697,2830,2840,2846,2898,2905,2911,2946,3062,3358,3777,4067,4088,4489,4490,4493,4494,4495,4496,4499,4501,4502,4923,5021,5026,5031,5156,5733,5734,5777,5788,6261,6263,6543,6622,6786,7137,7184,7466,7531,7781,7852,8326,8805,8811,9256,9914,10161,10345,10518,10590,10672,11151,22953…	ADCYAP1,ADRA1B,APLNR,APOE,ATP2A3,ATP2B4,BDKRB2,CACNB3,CALB1,CALB2,CALCR,CALM3,CAMK2D,CAV2,CCKBR,CD36,CD38,CDK5,CCR1,CNR1,DMD,DRD5,EDN1,EDNRB,FGF2,FKBP1A,FKBP1B,FYN,GJA1,GPR6,GPR17,LPAR4,GRIK2,GRIN2C,GRM1,GSTM2,HCRTR2,HTR2C,KCNK3,LYN,SMAD3,MT1A,MT1B,MT1E,MT1F,MT1G,MT1H,MT1M,MT1X,MT2A,NTSR1,OXTR,P2RX5,P2RY6,PDGFRA,PTGER3,PTGER4,PTPN6,PTPRC,RYR1,RYR3,SLC8A2,SNCA,STIM1,TNNI3,HSP90B1,WFS1,YWHAE,SLC30A…
19_Member	GO Biological Processes	GO:0010959	regulation of metal ion transport	-8.81334	-6.44566	77/379	116,154,187,409,482,486,493,784,799,808,817,967,1020,1230,1756,2040,2280,2281,2316,2534,2669,2697,2771,2775,2916,2946,3208,3383,3755,3781,3784,4067,4878,4923,5026,5031,5155,5348,5774,5777,5987,6588,6622,6640,6786,6844,7466,7531,7533,7852,8787,8811,8832,9914,9992,10345,11151,22953,23704,51393,53826,55532,55800,57190,57628,64805,79026,79570,80024,84502,84876,128414,130497,154215,196051,196996,286183	ADCYAP1,ADRB2,APLNR,ARRB2,ATP1B2,FXYD2,ATP2B4,CACNB3,CALCR,CALM3,CAMK2D,CD63,CDK5,CCR1,DMD,STOM,FKBP1A,FKBP1B,FLNA,FYN,GEM,GJA1,GNAI2,GNAO1,GRM6,GSTM2,HPCA,ICAM1,KCNG1,KCNN2,KCNQ1,LYN,NPPA,NTSR1,P2RX5,P2RY6,PDGFB,FXYD1,PTPN3,PTPN6,TRIM27,SLN,SNCA,SNTA1,STIM1,VAMP2,WFS1,YWHAE,YWHAH,CXCR4,RGS9,GALR2,CD84,ATP2C2,KCNE2,TRDN,CORO1A,P2RX2,KCNE4,TRPV2,FXYD6,SLC30A10,SCN3B,SELENON,DPP10,P2RY12,AHNAK,NKAI…
19_Member	GO Biological Processes	GO:0055065	metal ion homeostasis	-8.7986	-6.43533	114/645	116,147,187,212,348,475,482,489,493,537,624,784,793,794,799,808,817,858,887,948,952,1020,1230,1268,1756,1816,1906,1910,2247,2280,2281,2512,2534,2697,2771,2830,2840,2846,2898,2905,2911,2946,3062,3358,3777,3934,4067,4088,4489,4490,4493,4494,4495,4496,4499,4501,4502,4923,5021,5026,5031,5156,5733,5734,5777,5788,6261,6263,6332,6543,6622,6786,7137,7184,7466,7531,7781,7852,8326,8805,8811,9114,9256,9633,…	ADCYAP1,ADRA1B,APLNR,ALAS2,APOE,ATOX1,ATP1B2,ATP2A3,ATP2B4,ATP6AP1,BDKRB2,CACNB3,CALB1,CALB2,CALCR,CALM3,CAMK2D,CAV2,CCKBR,CD36,CD38,CDK5,CCR1,CNR1,DMD,DRD5,EDN1,EDNRB,FGF2,FKBP1A,FKBP1B,FTL,FYN,GJA1,GNAI2,GPR6,GPR17,LPAR4,GRIK2,GRIN2C,GRM1,GSTM2,HCRTR2,HTR2C,KCNK3,LCN2,LYN,SMAD3,MT1A,MT1B,MT1E,MT1F,MT1G,MT1H,MT1M,MT1X,MT2A,NTSR1,OXTR,P2RX5,P2RY6,PDGFRA,PTGER3,PTGER4,PTPN6,PTPRC,RYR1,RYR3,SCN7A,S…
19_Member	GO Biological Processes	GO:0051480	regulation of cytosolic calcium ion concentration	-8.05212	-5.79359	70/345	116,147,187,493,624,784,793,794,799,808,817,858,887,948,952,1020,1230,1268,1756,1906,1910,2247,2280,2281,2534,2697,2830,2840,2846,2905,2911,2946,3062,3358,3777,4067,4088,4923,5021,5026,5031,5156,5733,5734,5777,5788,6261,6263,6543,6622,7531,7852,8326,8811,9256,10161,10345,10518,10590,10672,11151,22953,51393,56477,57007,57190,80024,84502,338557,100133941	ADCYAP1,ADRA1B,APLNR,ATP2B4,BDKRB2,CACNB3,CALB1,CALB2,CALCR,CALM3,CAMK2D,CAV2,CCKBR,CD36,CD38,CDK5,CCR1,CNR1,DMD,EDN1,EDNRB,FGF2,FKBP1A,FKBP1B,FYN,GJA1,GPR6,GPR17,LPAR4,GRIN2C,GRM1,GSTM2,HCRTR2,HTR2C,KCNK3,LYN,SMAD3,NTSR1,OXTR,P2RX5,P2RY6,PDGFRA,PTGER3,PTGER4,PTPN6,PTPRC,RYR1,RYR3,SLC8A2,SNCA,YWHAE,CXCR4,FZD9,GALR2,TSPOAP1,LPAR6,TRDN,CIB2,SCGN,GNA13,CORO1A,P2RX2,TRPV2,CCL28,ACKR3,SELENON,SLC8B1,J…
19_Member	GO Biological Processes	GO:0006874	cellular calcium ion homeostasis	-7.72886	-5.5181	83/443	116,147,187,348,489,493,624,784,793,794,799,808,817,858,887,948,952,1020,1230,1268,1756,1816,1906,1910,2247,2280,2281,2534,2697,2830,2840,2846,2898,2905,2911,2946,3062,3358,3777,4067,4088,4923,5021,5026,5031,5156,5733,5734,5777,5788,6261,6263,6543,6622,6786,7137,7184,7466,7531,7852,8326,8811,9256,9914,10161,10345,10518,10590,10672,11151,22953,27032,51393,55013,56477,57007,57190,63933,79085,80024,…	ADCYAP1,ADRA1B,APLNR,APOE,ATP2A3,ATP2B4,BDKRB2,CACNB3,CALB1,CALB2,CALCR,CALM3,CAMK2D,CAV2,CCKBR,CD36,CD38,CDK5,CCR1,CNR1,DMD,DRD5,EDN1,EDNRB,FGF2,FKBP1A,FKBP1B,FYN,GJA1,GPR6,GPR17,LPAR4,GRIK2,GRIN2C,GRM1,GSTM2,HCRTR2,HTR2C,KCNK3,LYN,SMAD3,NTSR1,OXTR,P2RX5,P2RY6,PDGFRA,PTGER3,PTGER4,PTPN6,PTPRC,RYR1,RYR3,SLC8A2,SNCA,STIM1,TNNI3,HSP90B1,WFS1,YWHAE,CXCR4,FZD9,GALR2,TSPOAP1,ATP2C2,LPAR6,TRDN,CIB2,SCG…
19_Member	GO Biological Processes	GO:0055074	calcium ion homeostasis	-7.51415	-5.32843	84/455	116,147,187,348,489,493,624,784,793,794,799,808,817,858,887,948,952,1020,1230,1268,1756,1816,1906,1910,2247,2280,2281,2534,2697,2830,2840,2846,2898,2905,2911,2946,3062,3358,3777,4067,4088,4923,5021,5026,5031,5156,5733,5734,5777,5788,6261,6263,6543,6622,6786,7137,7184,7466,7531,7852,8326,8805,8811,9256,9914,10161,10345,10518,10590,10672,11151,22953,27032,51393,55013,56477,57007,57190,63933,79085,8…	ADCYAP1,ADRA1B,APLNR,APOE,ATP2A3,ATP2B4,BDKRB2,CACNB3,CALB1,CALB2,CALCR,CALM3,CAMK2D,CAV2,CCKBR,CD36,CD38,CDK5,CCR1,CNR1,DMD,DRD5,EDN1,EDNRB,FGF2,FKBP1A,FKBP1B,FYN,GJA1,GPR6,GPR17,LPAR4,GRIK2,GRIN2C,GRM1,GSTM2,HCRTR2,HTR2C,KCNK3,LYN,SMAD3,NTSR1,OXTR,P2RX5,P2RY6,PDGFRA,PTGER3,PTGER4,PTPN6,PTPRC,RYR1,RYR3,SLC8A2,SNCA,STIM1,TNNI3,HSP90B1,WFS1,YWHAE,CXCR4,FZD9,TRIM24,GALR2,TSPOAP1,ATP2C2,LPAR6,TRDN,C…
19_Member	GO Biological Processes	GO:0006816	calcium ion transport	-6.98373	-4.90129	76/409	187,409,489,493,778,779,784,799,808,817,1020,1230,1490,1756,2247,2280,2281,2534,2669,2697,2771,2775,2823,2905,2916,2946,3208,3358,3383,4067,4878,4923,4988,5026,5031,5155,5777,5788,5987,6261,6263,6520,6543,6588,6622,6786,7466,7531,7852,8787,8832,9033,9914,9992,10203,10345,10368,11151,22953,27032,29927,51393,54836,55013,57190,57685,63933,64805,79026,79085,80024,84502,84876,116443,196051,196996	APLNR,ARRB2,ATP2A3,ATP2B4,CACNA1F,CACNA1S,CACNB3,CALCR,CALM3,CAMK2D,CDK5,CCR1,CCN2,DMD,FGF2,FKBP1A,FKBP1B,FYN,GEM,GJA1,GNAI2,GNAO1,GPM6A,GRIN2C,GRM6,GSTM2,HPCA,HTR2C,ICAM1,LYN,NPPA,NTSR1,OPRM1,P2RX5,P2RY6,PDGFB,PTPN6,PTPRC,TRIM27,RYR1,RYR3,SLC3A2,SLC8A2,SLN,SNCA,STIM1,WFS1,YWHAE,CXCR4,RGS9,CD84,PKD2L1,ATP2C2,KCNE2,CALCRL,TRDN,CACNG3,CORO1A,P2RX2,ATP2C1,SEC61A1,TRPV2,BSPRY,MCUB,SELENON,CACHD1,MCUR…
19_Member	GO Biological Processes	GO:0070838	divalent metal ion transport	-6.45916	-4.46761	81/458	187,409,489,493,778,779,784,799,808,817,1020,1230,1490,1756,2247,2280,2281,2534,2669,2697,2771,2775,2823,2905,2916,2946,3208,3358,3383,4067,4878,4923,4988,5026,5031,5155,5777,5788,5987,6261,6263,6520,6543,6588,6622,6786,7466,7531,7781,7852,7991,8787,8832,9033,9914,9992,10203,10345,10368,11151,22953,27032,29927,30061,51393,54836,55013,55532,57190,57685,63933,64805,79026,79085,80024,84502,84876,116…	APLNR,ARRB2,ATP2A3,ATP2B4,CACNA1F,CACNA1S,CACNB3,CALCR,CALM3,CAMK2D,CDK5,CCR1,CCN2,DMD,FGF2,FKBP1A,FKBP1B,FYN,GEM,GJA1,GNAI2,GNAO1,GPM6A,GRIN2C,GRM6,GSTM2,HPCA,HTR2C,ICAM1,LYN,NPPA,NTSR1,OPRM1,P2RX5,P2RY6,PDGFB,PTPN6,PTPRC,TRIM27,RYR1,RYR3,SLC3A2,SLC8A2,SLN,SNCA,STIM1,WFS1,YWHAE,SLC30A3,CXCR4,TUSC3,RGS9,CD84,PKD2L1,ATP2C2,KCNE2,CALCRL,TRDN,CACNG3,CORO1A,P2RX2,ATP2C1,SEC61A1,SLC40A1,TRPV2,BSPRY,MC…
19_Member	GO Biological Processes	GO:0051924	regulation of calcium ion transport	-6.42734	-4.44139	50/238	187,409,784,799,808,817,1020,1230,1756,2280,2281,2534,2669,2697,2771,2775,2916,2946,3208,3383,4067,4878,4923,5026,5031,5155,5777,5987,6588,6622,6786,7466,7531,7852,8787,8832,9914,9992,10345,11151,22953,51393,57190,64805,79026,80024,84502,84876,196051,196996	APLNR,ARRB2,CACNB3,CALCR,CALM3,CAMK2D,CDK5,CCR1,DMD,FKBP1A,FKBP1B,FYN,GEM,GJA1,GNAI2,GNAO1,GRM6,GSTM2,HPCA,ICAM1,LYN,NPPA,NTSR1,P2RX5,P2RY6,PDGFB,PTPN6,TRIM27,SLN,SNCA,STIM1,WFS1,YWHAE,CXCR4,RGS9,CD84,ATP2C2,KCNE2,TRDN,CORO1A,P2RX2,TRPV2,SELENON,P2RY12,AHNAK,SLC8B1,JPH4,ORAI1,PLPP4,GRAMD2A
19_Member	GO Biological Processes	GO:0072511	divalent inorganic cation transport	-6.30019	-4.34033	81/462	187,409,489,493,778,779,784,799,808,817,1020,1230,1490,1756,2247,2280,2281,2534,2669,2697,2771,2775,2823,2905,2916,2946,3208,3358,3383,4067,4878,4923,4988,5026,5031,5155,5777,5788,5987,6261,6263,6520,6543,6588,6622,6786,7466,7531,7781,7852,7991,8787,8832,9033,9914,9992,10203,10345,10368,11151,22953,27032,29927,30061,51393,54836,55013,55532,57190,57685,63933,64805,79026,79085,80024,84502,84876,116…	APLNR,ARRB2,ATP2A3,ATP2B4,CACNA1F,CACNA1S,CACNB3,CALCR,CALM3,CAMK2D,CDK5,CCR1,CCN2,DMD,FGF2,FKBP1A,FKBP1B,FYN,GEM,GJA1,GNAI2,GNAO1,GPM6A,GRIN2C,GRM6,GSTM2,HPCA,HTR2C,ICAM1,LYN,NPPA,NTSR1,OPRM1,P2RX5,P2RY6,PDGFB,PTPN6,PTPRC,TRIM27,RYR1,RYR3,SLC3A2,SLC8A2,SLN,SNCA,STIM1,WFS1,YWHAE,SLC30A3,CXCR4,TUSC3,RGS9,CD84,PKD2L1,ATP2C2,KCNE2,CALCRL,TRDN,CACNG3,CORO1A,P2RX2,ATP2C1,SEC61A1,SLC40A1,TRPV2,BSPRY,MC…
19_Member	GO Biological Processes	GO:0007204	positive regulation of cytosolic calcium ion concentration	-6.26689	-4.31282	60/310	116,147,187,493,624,784,799,808,817,887,948,952,1020,1230,1268,1756,1906,1910,2247,2280,2281,2534,2697,2830,2840,2846,2905,2911,2946,3358,4067,4923,5021,5026,5031,5156,5733,5734,5777,5788,6261,6263,6543,6622,7852,8811,10161,10345,10518,10672,11151,22953,51393,56477,57007,57190,80024,84502,338557,100133941	ADCYAP1,ADRA1B,APLNR,ATP2B4,BDKRB2,CACNB3,CALCR,CALM3,CAMK2D,CCKBR,CD36,CD38,CDK5,CCR1,CNR1,DMD,EDN1,EDNRB,FGF2,FKBP1A,FKBP1B,FYN,GJA1,GPR6,GPR17,LPAR4,GRIN2C,GRM1,GSTM2,HTR2C,LYN,NTSR1,OXTR,P2RX5,P2RY6,PDGFRA,PTGER3,PTGER4,PTPN6,PTPRC,RYR1,RYR3,SLC8A2,SNCA,CXCR4,GALR2,LPAR6,TRDN,CIB2,GNA13,CORO1A,P2RX2,TRPV2,CCL28,ACKR3,SELENON,SLC8B1,JPH4,FFAR4,CD24
19_Member	GO Biological Processes	GO:0070588	calcium ion transmembrane transport	-5.06815	-3.3113	55/300	187,489,493,778,779,784,799,808,817,1020,1756,2247,2280,2281,2534,2669,2823,2905,2946,3208,3358,4067,4878,4923,4988,5031,5777,5788,6261,6263,6543,6588,6622,6786,7531,9033,9914,9992,10345,10368,11151,27032,29927,51393,55013,57190,57685,63933,64805,79026,79085,80024,84502,84876,116443	APLNR,ATP2A3,ATP2B4,CACNA1F,CACNA1S,CACNB3,CALCR,CALM3,CAMK2D,CDK5,DMD,FGF2,FKBP1A,FKBP1B,FYN,GEM,GPM6A,GRIN2C,GSTM2,HPCA,HTR2C,LYN,NPPA,NTSR1,OPRM1,P2RY6,PTPN6,PTPRC,RYR1,RYR3,SLC8A2,SLN,SNCA,STIM1,YWHAE,PKD2L1,ATP2C2,KCNE2,TRDN,CACNG3,CORO1A,ATP2C1,SEC61A1,TRPV2,MCUB,SELENON,CACHD1,MCUR1,P2RY12,AHNAK,SLC25A23,SLC8B1,JPH4,ORAI1,GRIN3A
19_Member	GO Biological Processes	GO:0060401	cytosolic calcium ion transport	-5.02086	-3.2779	36/168	187,489,493,784,799,808,817,1490,1756,2247,2280,2281,2534,2905,2946,3358,4067,4923,5026,5031,5777,5788,6261,6263,6543,6622,10345,11151,22953,51393,55013,57190,63933,79085,80024,84502	APLNR,ATP2A3,ATP2B4,CACNB3,CALCR,CALM3,CAMK2D,CCN2,DMD,FGF2,FKBP1A,FKBP1B,FYN,GRIN2C,GSTM2,HTR2C,LYN,NTSR1,P2RX5,P2RY6,PTPN6,PTPRC,RYR1,RYR3,SLC8A2,SNCA,TRDN,CORO1A,P2RX2,TRPV2,MCUB,SELENON,MCUR1,SLC25A23,SLC8B1,JPH4
19_Member	GO Biological Processes	GO:0051235	maintenance of location	-4.88351	-3.17002	57/319	187,346,348,585,808,817,948,1020,1756,2247,2280,2281,2316,2512,2583,2629,2697,2946,3099,3358,3553,3934,4067,4232,4681,4794,4923,5031,5167,5465,5777,5788,6261,6263,6622,6713,7114,7184,7295,7781,9168,10062,10210,10345,11079,11151,22873,51684,57146,57190,60526,79085,80024,84502,85477,114882,199699	APLNR,APOC4,APOE,BBS4,CALM3,CAMK2D,CD36,CDK5,DMD,FGF2,FKBP1A,FKBP1B,FLNA,FTL,B4GALNT1,GBA,GJA1,GSTM2,HK2,HTR2C,IL1B,LCN2,LYN,MEST,NBL1,NFKBIE,NTSR1,P2RY6,ENPP1,PPARA,PTPN6,PTPRC,RYR1,RYR3,SNCA,SQLE,TMSB4X,HSP90B1,TXN,SLC30A3,TMSB10,NR1H3,TOPORS,TRDN,RER1,CORO1A,DZIP1,SUFU,TMEM159,SELENON,LDAH,SLC25A23,SLC8B1,JPH4,SCIN,OSBPL8,DAND5
19_Member	GO Biological Processes	GO:0060402	calcium ion transport into cytosol	-3.98991	-2.46095	31/152	187,493,784,799,808,817,1756,2247,2280,2281,2534,2905,2946,3358,4067,4923,5026,5031,5777,5788,6261,6263,6543,6622,10345,11151,22953,51393,57190,80024,84502	APLNR,ATP2B4,CACNB3,CALCR,CALM3,CAMK2D,DMD,FGF2,FKBP1A,FKBP1B,FYN,GRIN2C,GSTM2,HTR2C,LYN,NTSR1,P2RX5,P2RY6,PTPN6,PTPRC,RYR1,RYR3,SLC8A2,SNCA,TRDN,CORO1A,P2RX2,TRPV2,SELENON,SLC8B1,JPH4
19_Member	GO Biological Processes	GO:0097553	calcium ion transmembrane import into cytosol	-3.85243	-2.35086	28/134	187,493,799,808,817,1756,2247,2280,2281,2534,2905,2946,3358,4067,4923,5031,5777,5788,6261,6263,6543,6622,10345,11151,51393,57190,80024,84502	APLNR,ATP2B4,CALCR,CALM3,CAMK2D,DMD,FGF2,FKBP1A,FKBP1B,FYN,GRIN2C,GSTM2,HTR2C,LYN,NTSR1,P2RY6,PTPN6,PTPRC,RYR1,RYR3,SLC8A2,SNCA,TRDN,CORO1A,TRPV2,SELENON,SLC8B1,JPH4
19_Member	GO Biological Processes	GO:1901019	regulation of calcium ion transmembrane transporter activity	-3.77828	-2.29286	20/83	784,808,817,1020,1756,2280,2281,2669,2946,3208,4878,5031,6588,6786,7531,9992,10345,57190,79026,84502	CACNB3,CALM3,CAMK2D,CDK5,DMD,FKBP1A,FKBP1B,GEM,GSTM2,HPCA,NPPA,P2RY6,SLN,STIM1,YWHAE,KCNE2,TRDN,SELENON,AHNAK,JPH4
19_Member	GO Biological Processes	GO:0050848	regulation of calcium-mediated signaling	-3.44865	-2.05069	21/94	493,808,817,1012,1756,2280,2281,2946,3479,4935,5026,5031,5164,5598,6543,8445,10345,10519,22953,57190,84502	ATP2B4,CALM3,CAMK2D,CDH13,DMD,FKBP1A,FKBP1B,GSTM2,IGF1,GPR143,P2RX5,P2RY6,PDK2,MAPK7,SLC8A2,DYRK2,TRDN,CIB1,P2RX2,SELENON,JPH4
19_Member	GO Biological Processes	GO:1903169	regulation of calcium ion transmembrane transport	-3.31004	-1.94325	28/144	187,784,799,808,817,1020,1756,2280,2281,2534,2669,2946,3208,4067,4878,4923,5031,5777,6588,6622,6786,7531,9992,10345,11151,57190,79026,84502	APLNR,CACNB3,CALCR,CALM3,CAMK2D,CDK5,DMD,FKBP1A,FKBP1B,FYN,GEM,GSTM2,HPCA,LYN,NPPA,NTSR1,P2RY6,PTPN6,SLN,SNCA,STIM1,YWHAE,KCNE2,TRDN,CORO1A,SELENON,AHNAK,JPH4
19_Member	GO Biological Processes	GO:0019722	calcium-mediated signaling	-3.1997	-1.85883	37/212	493,576,808,817,1012,1131,1230,1756,1906,1910,2280,2281,2905,2946,3208,3479,4772,4935,5026,5031,5164,5598,5788,6543,7137,7852,8445,10345,10519,22953,57007,57190,64805,79772,84502,84687,201191	ATP2B4,ADGRB2,CALM3,CAMK2D,CDH13,CHRM3,CCR1,DMD,EDN1,EDNRB,FKBP1A,FKBP1B,GRIN2C,GSTM2,HPCA,IGF1,NFATC1,GPR143,P2RX5,P2RY6,PDK2,MAPK7,PTPRC,SLC8A2,TNNI3,CXCR4,DYRK2,TRDN,CIB1,P2RX2,ACKR3,SELENON,P2RY12,MCTP1,JPH4,PPP1R9B,SAMD14
19_Member	GO Biological Processes	GO:0051208	sequestering of calcium ion	-3.1569	-1.82532	24/119	187,808,817,1756,2247,2280,2281,2946,3358,4067,4923,5031,5777,5788,6261,6263,6622,7184,10345,11151,57190,79085,80024,84502	APLNR,CALM3,CAMK2D,DMD,FGF2,FKBP1A,FKBP1B,GSTM2,HTR2C,LYN,NTSR1,P2RY6,PTPN6,PTPRC,RYR1,RYR3,SNCA,HSP90B1,TRDN,CORO1A,SELENON,SLC25A23,SLC8B1,JPH4
19_Member	GO Biological Processes	GO:0051282	regulation of sequestering of calcium ion	-2.99837	-1.70871	23/115	187,808,817,1756,2247,2280,2281,2946,3358,4067,4923,5031,5777,5788,6261,6263,6622,10345,11151,57190,79085,80024,84502	APLNR,CALM3,CAMK2D,DMD,FGF2,FKBP1A,FKBP1B,GSTM2,HTR2C,LYN,NTSR1,P2RY6,PTPN6,PTPRC,RYR1,RYR3,SNCA,TRDN,CORO1A,SELENON,SLC25A23,SLC8B1,JPH4
19_Member	GO Biological Processes	GO:0010522	regulation of calcium ion transport into cytosol	-2.96753	-1.68744	20/95	187,799,808,817,1756,2280,2281,2534,2946,4067,4923,5026,5031,5777,6622,10345,11151,22953,57190,84502	APLNR,CALCR,CALM3,CAMK2D,DMD,FKBP1A,FKBP1B,FYN,GSTM2,LYN,NTSR1,P2RX5,P2RY6,PTPN6,SNCA,TRDN,CORO1A,P2RX2,SELENON,JPH4
19_Member	GO Biological Processes	GO:0051209	release of sequestered calcium ion into cytosol	-2.78779	-1.54649	22/112	187,808,817,1756,2247,2280,2281,2946,3358,4067,4923,5031,5777,5788,6261,6263,6622,10345,11151,57190,80024,84502	APLNR,CALM3,CAMK2D,DMD,FGF2,FKBP1A,FKBP1B,GSTM2,HTR2C,LYN,NTSR1,P2RY6,PTPN6,PTPRC,RYR1,RYR3,SNCA,TRDN,CORO1A,SELENON,SLC8B1,JPH4
19_Member	GO Biological Processes	GO:0051283	negative regulation of sequestering of calcium ion	-2.73623	-1.50637	22/113	187,808,817,1756,2247,2280,2281,2946,3358,4067,4923,5031,5777,5788,6261,6263,6622,10345,11151,57190,80024,84502	APLNR,CALM3,CAMK2D,DMD,FGF2,FKBP1A,FKBP1B,GSTM2,HTR2C,LYN,NTSR1,P2RY6,PTPN6,PTPRC,RYR1,RYR3,SNCA,TRDN,CORO1A,SELENON,SLC8B1,JPH4
19_Member	GO Biological Processes	GO:0051279	regulation of release of sequestered calcium ion into cytosol	-2.487	-1.32261	16/76	187,808,817,1756,2280,2281,2946,4067,4923,5031,5777,6622,10345,11151,57190,84502	APLNR,CALM3,CAMK2D,DMD,FKBP1A,FKBP1B,GSTM2,LYN,NTSR1,P2RY6,PTPN6,SNCA,TRDN,CORO1A,SELENON,JPH4
20_Summary	GO Biological Processes	GO:0090087	regulation of peptide transport	-10.7729	-8.05749	108/557	116,348,572,784,948,952,975,1020,1268,1393,1445,2029,2040,2044,2064,2281,2316,2534,2697,2737,2746,2922,3033,3156,3208,3265,3301,3358,3418,3479,3553,3728,4088,4345,4826,4856,4924,4947,4988,5019,5106,5296,5481,5569,5580,5594,5950,6608,6659,6804,6844,7099,7260,7273,7295,7430,7531,8111,8447,8655,8736,8882,8934,8938,9141,9324,9531,9607,9854,10062,10178,10204,10519,11069,11142,22885,23379,23410,23657,2…	ADCYAP1,APOE,BAD,CACNB3,CD36,CD38,CD81,CDK5,CNR1,CRHBP,CSK,ENSA,STOM,EPHA5,ERBB2,FKBP1B,FLNA,FYN,GJA1,GLI3,GLUD1,GRP,HADH,HMGCR,HPCA,HRAS,DNAJA1,HTR2C,IDH2,IGF1,IL1B,JUP,SMAD3,CD200,NNAT,CCN3,NUCB1,OAZ2,OPRM1,OXCT1,PCK2,PIK3R2,PPID,PKIA,PRKCD,MAPK1,RBP4,SMO,SOX4,STX1A,VAMP2,TLR4,EIPR1,TTN,TXN,EZR,YWHAE,GPR68,DOC2B,DYNLL1,MYOM1,ZPR1,RAB29,BAIAP3,PDCD5,HMGN3,BAG3,CARTPT,C2CD2L,NR1H3,TENM1,NUTF2,CIB…
20_Member	GO Biological Processes	GO:0090087	regulation of peptide transport	-10.7729	-8.05749	108/557	116,348,572,784,948,952,975,1020,1268,1393,1445,2029,2040,2044,2064,2281,2316,2534,2697,2737,2746,2922,3033,3156,3208,3265,3301,3358,3418,3479,3553,3728,4088,4345,4826,4856,4924,4947,4988,5019,5106,5296,5481,5569,5580,5594,5950,6608,6659,6804,6844,7099,7260,7273,7295,7430,7531,8111,8447,8655,8736,8882,8934,8938,9141,9324,9531,9607,9854,10062,10178,10204,10519,11069,11142,22885,23379,23410,23657,2…	ADCYAP1,APOE,BAD,CACNB3,CD36,CD38,CD81,CDK5,CNR1,CRHBP,CSK,ENSA,STOM,EPHA5,ERBB2,FKBP1B,FLNA,FYN,GJA1,GLI3,GLUD1,GRP,HADH,HMGCR,HPCA,HRAS,DNAJA1,HTR2C,IDH2,IGF1,IL1B,JUP,SMAD3,CD200,NNAT,CCN3,NUCB1,OAZ2,OPRM1,OXCT1,PCK2,PIK3R2,PPID,PKIA,PRKCD,MAPK1,RBP4,SMO,SOX4,STX1A,VAMP2,TLR4,EIPR1,TTN,TXN,EZR,YWHAE,GPR68,DOC2B,DYNLL1,MYOM1,ZPR1,RAB29,BAIAP3,PDCD5,HMGN3,BAG3,CARTPT,C2CD2L,NR1H3,TENM1,NUTF2,CIB…
20_Member	GO Biological Processes	GO:0070201	regulation of establishment of protein localization	-10.6837	-7.99693	110/573	348,572,784,948,952,975,1020,1268,1445,1736,2029,2040,2044,2064,2281,2316,2534,2697,2737,2746,3033,3156,3208,3265,3301,3418,3479,3553,3728,4088,4345,4826,4856,4924,4947,4988,5019,5106,5296,5481,5569,5580,5594,5950,6608,6659,6804,6844,7013,7099,7159,7260,7273,7295,7430,7531,7533,7534,8111,8447,8655,8736,8882,8934,8938,9141,9324,9531,9607,9854,10062,10178,10204,10519,11069,11142,22885,22948,23368,2…	APOE,BAD,CACNB3,CD36,CD38,CD81,CDK5,CNR1,CSK,DKC1,ENSA,STOM,EPHA5,ERBB2,FKBP1B,FLNA,FYN,GJA1,GLI3,GLUD1,HADH,HMGCR,HPCA,HRAS,DNAJA1,IDH2,IGF1,IL1B,JUP,SMAD3,CD200,NNAT,CCN3,NUCB1,OAZ2,OPRM1,OXCT1,PCK2,PIK3R2,PPID,PKIA,PRKCD,MAPK1,RBP4,SMO,SOX4,STX1A,VAMP2,TERF1,TLR4,TP53BP2,EIPR1,TTN,TXN,EZR,YWHAE,YWHAH,YWHAZ,GPR68,DOC2B,DYNLL1,MYOM1,ZPR1,RAB29,BAIAP3,PDCD5,HMGN3,BAG3,CARTPT,C2CD2L,NR1H3,TENM1,NU…
20_Member	GO Biological Processes	GO:0051223	regulation of protein transport	-10.5637	-7.90049	103/526	348,572,784,948,952,975,1020,1268,1445,2029,2040,2044,2064,2281,2316,2534,2697,2737,2746,3033,3156,3208,3265,3301,3418,3479,3553,3728,4088,4345,4826,4856,4924,4947,4988,5019,5106,5296,5481,5569,5580,5594,5950,6608,6659,6804,6844,7099,7260,7273,7295,7430,7531,8111,8447,8655,8736,8882,8934,8938,9141,9324,9531,9607,9854,10062,10178,10204,10519,11069,11142,22885,23379,23410,23657,25924,25930,29085,29…	APOE,BAD,CACNB3,CD36,CD38,CD81,CDK5,CNR1,CSK,ENSA,STOM,EPHA5,ERBB2,FKBP1B,FLNA,FYN,GJA1,GLI3,GLUD1,HADH,HMGCR,HPCA,HRAS,DNAJA1,IDH2,IGF1,IL1B,JUP,SMAD3,CD200,NNAT,CCN3,NUCB1,OAZ2,OPRM1,OXCT1,PCK2,PIK3R2,PPID,PKIA,PRKCD,MAPK1,RBP4,SMO,SOX4,STX1A,VAMP2,TLR4,EIPR1,TTN,TXN,EZR,YWHAE,GPR68,DOC2B,DYNLL1,MYOM1,ZPR1,RAB29,BAIAP3,PDCD5,HMGN3,BAG3,CARTPT,C2CD2L,NR1H3,TENM1,NUTF2,CIB1,RAPGEF4,PKIG,ABLIM3,IC…
20_Member	GO Biological Processes	GO:1904951	positive regulation of establishment of protein localization	-8.84109	-6.45991	70/331	572,784,952,975,1020,1736,2040,2064,2316,2534,2697,2737,2746,3208,3265,3479,3553,3728,4088,4826,4947,5019,5106,5296,5481,5580,5594,5950,6608,6659,6844,7099,7159,7273,7430,7531,7533,7534,8111,8447,8655,8736,8882,8934,8938,9141,9531,9854,10178,10204,10519,22885,22948,23368,23379,23410,25924,25930,29085,54741,55691,57393,57555,59286,79778,79971,94121,114899,125170,388581	BAD,CACNB3,CD38,CD81,CDK5,DKC1,STOM,ERBB2,FLNA,FYN,GJA1,GLI3,GLUD1,HPCA,HRAS,IGF1,IL1B,JUP,SMAD3,NNAT,OAZ2,OXCT1,PCK2,PIK3R2,PPID,PRKCD,MAPK1,RBP4,SMO,SOX4,VAMP2,TLR4,TP53BP2,TTN,EZR,YWHAE,YWHAH,YWHAZ,GPR68,DOC2B,DYNLL1,MYOM1,ZPR1,RAB29,BAIAP3,PDCD5,BAG3,C2CD2L,TENM1,NUTF2,CIB1,ABLIM3,CCT5,PPP1R13B,ICE1,SIRT3,MYRIP,PTPN23,PHPT1,LEPROT,FRMD4A,CLTRN,NLGN2,UBL5,MICALL2,WLS,SYTL4,C1QTNF3,MIEF2,C1QTNF…
20_Member	GO Biological Processes	GO:0051222	positive regulation of protein transport	-8.72863	-6.38256	64/293	572,784,952,975,1020,2040,2064,2316,2534,2697,2737,2746,3208,3265,3479,3553,3728,4088,4826,4947,5019,5106,5296,5481,5580,5594,5950,6608,6659,6844,7099,7273,7430,7531,8111,8447,8655,8736,8882,8934,8938,9141,9531,9854,10178,10204,10519,22885,23379,23410,25924,25930,29085,54741,55691,57393,57555,59286,79778,79971,94121,114899,125170,388581	BAD,CACNB3,CD38,CD81,CDK5,STOM,ERBB2,FLNA,FYN,GJA1,GLI3,GLUD1,HPCA,HRAS,IGF1,IL1B,JUP,SMAD3,NNAT,OAZ2,OXCT1,PCK2,PIK3R2,PPID,PRKCD,MAPK1,RBP4,SMO,SOX4,VAMP2,TLR4,TTN,EZR,YWHAE,GPR68,DOC2B,DYNLL1,MYOM1,ZPR1,RAB29,BAIAP3,PDCD5,BAG3,C2CD2L,TENM1,NUTF2,CIB1,ABLIM3,ICE1,SIRT3,MYRIP,PTPN23,PHPT1,LEPROT,FRMD4A,CLTRN,NLGN2,UBL5,MICALL2,WLS,SYTL4,C1QTNF3,MIEF2,C1QTNF12
20_Member	GO Biological Processes	GO:1903827	regulation of cellular protein localization	-7.44101	-5.2668	96/545	163,493,572,627,705,784,919,948,975,983,1020,1445,1736,2040,2064,2239,2262,2316,2534,2737,2817,2824,3208,3265,3301,3553,3728,4088,4478,4924,4947,5296,5300,5525,5563,5569,5580,5594,5764,5780,6608,6612,6711,6844,7013,7107,7159,7295,7415,7430,7531,7533,7534,8326,8882,8934,9141,9531,9750,10082,10178,10204,10490,10519,10979,11079,11142,22885,22948,23184,23368,23379,23657,25937,25999,29969,51009,51684,…	AP2B1,ATP2B4,BAD,BDNF,BYSL,CACNB3,CD247,CD36,CD81,CDK1,CDK5,CSK,DKC1,STOM,ERBB2,GPC4,GPC5,FLNA,FYN,GLI3,GPC1,GPM6B,HPCA,HRAS,DNAJA1,IL1B,JUP,SMAD3,MSN,NUCB1,OAZ2,PIK3R2,PIN1,PPP2R5A,PRKAA2,PKIA,PRKCD,MAPK1,PTN,PTPN9,SMO,SUMO3,SPTBN1,VAMP2,TERF1,GPR137B,TP53BP2,TXN,VCP,EZR,YWHAE,YWHAH,YWHAZ,FZD9,ZPR1,RAB29,PDCD5,BAG3,RIPOR2,GPC6,TENM1,NUTF2,VTI1B,CIB1,FERMT2,RER1,PKIG,ABLIM3,CCT5,MESD,PPP1R13B,ICE…
20_Member	GO Biological Processes	GO:0032386	regulation of intracellular transport	-6.15643	-4.21913	75/421	784,808,948,975,1001,1020,1268,2040,2064,2316,2534,2737,3208,3265,3553,3566,3598,3728,4067,4088,4478,4600,4924,4947,5296,5413,5569,5580,5582,5594,5595,5908,6608,6804,6844,7260,7295,7430,7476,7531,7874,8832,8882,8934,9141,9531,10178,10204,10519,11142,22885,22930,23209,23286,23379,25930,29969,51009,51684,54741,55612,56850,59286,79778,80055,84062,84277,91319,116443,118426,125170,127933,160622,254263…	CACNB3,CALM3,CD36,CD81,CDH3,CDK5,CNR1,STOM,ERBB2,FLNA,FYN,GLI3,HPCA,HRAS,IL1B,IL4R,IL13RA2,JUP,LYN,SMAD3,MSN,MX2,NUCB1,OAZ2,PIK3R2,SEPTIN5,PKIA,PRKCD,PRKCG,MAPK1,MAPK3,RAP1B,SMO,STX1A,VAMP2,EIPR1,TXN,EZR,WNT7A,YWHAE,USP7,CD84,ZPR1,RAB29,PDCD5,BAG3,TENM1,NUTF2,CIB1,PKIG,ABLIM3,RAB3GAP1,MLC1,WWC1,ICE1,PTPN23,MDFIC,DERL2,SUFU,LEPROT,FERMT1,GRIPAP1,UBL5,MICALL2,PGAP1,DTNBP1,DNAJC30,DERL3,GRIN3A,BORCS…
20_Member	GO Biological Processes	GO:0033157	regulation of intracellular protein transport	-5.25288	-3.45983	46/232	784,948,975,1020,2040,2064,2316,2534,2737,3208,3265,3553,3728,4088,4924,4947,5296,5569,5580,5594,6608,6844,7295,7531,8882,8934,9141,9531,10178,10204,10519,11142,22885,23379,29969,51009,51684,54741,55612,56850,59286,79778,91319,125170,127933,160622	CACNB3,CD36,CD81,CDK5,STOM,ERBB2,FLNA,FYN,GLI3,HPCA,HRAS,IL1B,JUP,SMAD3,NUCB1,OAZ2,PIK3R2,PKIA,PRKCD,MAPK1,SMO,VAMP2,TXN,YWHAE,ZPR1,RAB29,PDCD5,BAG3,TENM1,NUTF2,CIB1,PKIG,ABLIM3,ICE1,MDFIC,DERL2,SUFU,LEPROT,FERMT1,GRIPAP1,UBL5,MICALL2,DERL3,MIEF2,UHMK1,TAMALIN
20_Member	GO Biological Processes	GO:1903829	positive regulation of cellular protein localization	-5.23568	-3.44615	61/340	163,493,572,784,919,975,983,1020,1736,2040,2064,2316,2534,2737,3208,3265,3553,3728,4088,4478,4947,5296,5563,5580,5594,5764,5780,6608,6711,6844,7107,7159,7430,7531,7533,7534,8882,8934,9141,9531,10178,10204,10519,10979,11079,22885,22948,23184,23368,23379,25937,25999,54550,54741,57628,57787,59286,65992,79778,84687,125170	AP2B1,ATP2B4,BAD,CACNB3,CD247,CD81,CDK1,CDK5,DKC1,STOM,ERBB2,FLNA,FYN,GLI3,HPCA,HRAS,IL1B,JUP,SMAD3,MSN,OAZ2,PIK3R2,PRKAA2,PRKCD,MAPK1,PTN,PTPN9,SMO,SPTBN1,VAMP2,GPR137B,TP53BP2,EZR,YWHAE,YWHAH,YWHAZ,ZPR1,RAB29,PDCD5,BAG3,TENM1,NUTF2,CIB1,FERMT2,RER1,ABLIM3,CCT5,MESD,PPP1R13B,ICE1,WWTR1,CLIP3,NECAB2,LEPROT,DPP10,MARK4,UBL5,DDRGK1,MICALL2,PPP1R9B,MIEF2
20_Member	GO Biological Processes	GO:1904589	regulation of protein import	-4.92722	-3.20342	18/59	948,2316,2737,3728,4088,5296,5569,5580,5594,6608,8882,9141,9531,10204,11142,29969,51684,55612	CD36,FLNA,GLI3,JUP,SMAD3,PIK3R2,PKIA,PRKCD,MAPK1,SMO,ZPR1,PDCD5,BAG3,NUTF2,PKIG,MDFIC,SUFU,FERMT1
20_Member	GO Biological Processes	GO:0032388	positive regulation of intracellular transport	-4.89652	-3.18206	43/218	784,975,1001,1020,1268,2040,2064,2316,2534,2737,3208,3265,3553,3566,3728,4088,4478,4947,5296,5580,5594,6608,6844,7260,7430,7531,8882,8934,9141,9531,10178,10204,10519,22885,23209,23379,25930,54741,59286,79778,80055,118426,125170	CACNB3,CD81,CDH3,CDK5,CNR1,STOM,ERBB2,FLNA,FYN,GLI3,HPCA,HRAS,IL1B,IL4R,JUP,SMAD3,MSN,OAZ2,PIK3R2,PRKCD,MAPK1,SMO,VAMP2,EIPR1,EZR,YWHAE,ZPR1,RAB29,PDCD5,BAG3,TENM1,NUTF2,CIB1,ABLIM3,MLC1,ICE1,PTPN23,LEPROT,UBL5,MICALL2,PGAP1,BORCS5,MIEF2
20_Member	GO Biological Processes	GO:0042306	regulation of protein import into nucleus	-4.65587	-2.98768	17/56	948,2316,2737,3728,4088,5296,5569,5580,5594,6608,8882,9531,10204,11142,29969,51684,55612	CD36,FLNA,GLI3,JUP,SMAD3,PIK3R2,PKIA,PRKCD,MAPK1,SMO,ZPR1,BAG3,NUTF2,PKIG,MDFIC,SUFU,FERMT1
20_Member	GO Biological Processes	GO:0090316	positive regulation of intracellular protein transport	-4.53806	-2.89349	33/156	784,975,1020,2040,2064,2316,2534,2737,3208,3265,3553,3728,4088,4947,5296,5580,5594,6608,6844,7531,8882,8934,9141,9531,10178,10204,10519,22885,23379,54741,59286,79778,125170	CACNB3,CD81,CDK5,STOM,ERBB2,FLNA,FYN,GLI3,HPCA,HRAS,IL1B,JUP,SMAD3,OAZ2,PIK3R2,PRKCD,MAPK1,SMO,VAMP2,YWHAE,ZPR1,RAB29,PDCD5,BAG3,TENM1,NUTF2,CIB1,ABLIM3,ICE1,LEPROT,UBL5,MICALL2,MIEF2
20_Member	GO Biological Processes	GO:0046822	regulation of nucleocytoplasmic transport	-3.71581	-2.25288	23/103	948,1020,2316,2737,3553,3728,4088,4600,5296,5569,5580,5594,6608,7295,7531,8882,9531,10204,11142,29969,51684,55612,127933	CD36,CDK5,FLNA,GLI3,IL1B,JUP,SMAD3,MX2,PIK3R2,PKIA,PRKCD,MAPK1,SMO,TXN,YWHAE,ZPR1,BAG3,NUTF2,PKIG,MDFIC,SUFU,FERMT1,UHMK1
20_Member	GO Biological Processes	GO:1904591	positive regulation of protein import	-3.40202	-2.01625	12/40	2316,2737,3728,4088,5296,5580,5594,6608,8882,9141,9531,10204	FLNA,GLI3,JUP,SMAD3,PIK3R2,PRKCD,MAPK1,SMO,ZPR1,PDCD5,BAG3,NUTF2
20_Member	GO Biological Processes	GO:1900180	regulation of protein localization to nucleus	-3.31073	-1.94349	26/130	705,948,983,1736,2316,2534,2737,3728,4088,5296,5300,5569,5580,5594,6608,6612,8882,9531,10204,10979,11142,22948,25937,29969,51684,55612	BYSL,CD36,CDK1,DKC1,FLNA,FYN,GLI3,JUP,SMAD3,PIK3R2,PIN1,PKIA,PRKCD,MAPK1,SMO,SUMO3,ZPR1,BAG3,NUTF2,FERMT2,PKIG,CCT5,WWTR1,MDFIC,SUFU,FERMT1
20_Member	GO Biological Processes	GO:0051170	import into nucleus	-3.13245	-1.80605	30/162	754,948,1026,1434,1871,2316,2737,3728,4088,5296,5569,5580,5594,6608,6633,6634,8882,9531,10204,11142,11218,29969,51684,54960,55198,55612,55705,55916,79902,503542	PTTG1IP,CD36,CDKN1A,CSE1L,E2F3,FLNA,GLI3,JUP,SMAD3,PIK3R2,PKIA,PRKCD,MAPK1,SMO,SNRPD2,SNRPD3,ZPR1,BAG3,NUTF2,PKIG,DDX20,MDFIC,SUFU,GEMIN8,APPL2,FERMT1,IPO9,NXT2,NUP85,SPRN
20_Member	GO Biological Processes	GO:0042307	positive regulation of protein import into nucleus	-3.01874	-1.72242	11/38	2316,2737,3728,4088,5296,5580,5594,6608,8882,9531,10204	FLNA,GLI3,JUP,SMAD3,PIK3R2,PRKCD,MAPK1,SMO,ZPR1,BAG3,NUTF2
20_Member	GO Biological Processes	GO:0034504	protein localization to nucleus	-2.90143	-1.63384	44/274	585,705,754,948,983,1020,1026,1434,1736,1871,2316,2534,2737,3728,4088,4487,5296,5300,5569,5580,5594,6608,6612,6662,7295,7531,8882,9531,10204,10210,10979,11142,22948,25937,29969,51684,55198,55612,55705,55916,79902,114882,163590,503542	BBS4,BYSL,PTTG1IP,CD36,CDK1,CDK5,CDKN1A,CSE1L,DKC1,E2F3,FLNA,FYN,GLI3,JUP,SMAD3,MSX1,PIK3R2,PIN1,PKIA,PRKCD,MAPK1,SMO,SUMO3,SOX9,TXN,YWHAE,ZPR1,BAG3,NUTF2,TOPORS,FERMT2,PKIG,CCT5,WWTR1,MDFIC,SUFU,APPL2,FERMT1,IPO9,NXT2,NUP85,OSBPL8,TOR1AIP2,SPRN
20_Member	GO Biological Processes	GO:0006606	protein import into nucleus	-2.7228	-1.49583	26/142	754,948,1026,1434,1871,2316,2737,3728,4088,5296,5569,5580,5594,6608,8882,9531,10204,11142,29969,51684,55198,55612,55705,55916,79902,503542	PTTG1IP,CD36,CDKN1A,CSE1L,E2F3,FLNA,GLI3,JUP,SMAD3,PIK3R2,PKIA,PRKCD,MAPK1,SMO,ZPR1,BAG3,NUTF2,PKIG,MDFIC,SUFU,APPL2,FERMT1,IPO9,NXT2,NUP85,SPRN
20_Member	GO Biological Processes	GO:0017038	protein import	-2.44273	-1.29359	33/202	348,754,948,1026,1434,1871,2316,2737,3728,4088,5296,5569,5580,5594,5824,6608,8882,9141,9531,10204,10245,11142,26519,26521,29969,51079,51684,55198,55612,55705,55916,79902,503542	APOE,PTTG1IP,CD36,CDKN1A,CSE1L,E2F3,FLNA,GLI3,JUP,SMAD3,PIK3R2,PKIA,PRKCD,MAPK1,PEX19,SMO,ZPR1,PDCD5,BAG3,NUTF2,TIMM17B,PKIG,TIMM10,TIMM8B,MDFIC,NDUFA13,SUFU,APPL2,FERMT1,IPO9,NXT2,NUP85,SPRN
20_Member	GO Biological Processes	GO:1900182	positive regulation of protein localization to nucleus	-2.36467	-1.23749	17/85	983,1736,2316,2534,2737,3728,4088,5296,5580,5594,6608,8882,9531,10204,10979,22948,25937	CDK1,DKC1,FLNA,FYN,GLI3,JUP,SMAD3,PIK3R2,PRKCD,MAPK1,SMO,ZPR1,BAG3,NUTF2,FERMT2,CCT5,WWTR1
20_Member	GO Biological Processes	GO:0046824	positive regulation of nucleocytoplasmic transport	-2.16618	-1.09486	13/61	2316,2737,3553,3728,4088,5296,5580,5594,6608,7531,8882,9531,10204	FLNA,GLI3,IL1B,JUP,SMAD3,PIK3R2,PRKCD,MAPK1,SMO,YWHAE,ZPR1,BAG3,NUTF2

## Sheet: MCI_S VS. MCI_AD (WGCNA)
GroupID	Category	Term	Description	LogP	Log(q-value)	InTerm_InList	Genes	Symbols
1_Summary	KEGG Pathway	hsa04080	Neuroactive ligand-receptor interaction	-12.5858	-8.72239	23/277	147,1268,1816,2556,2558,2560,2742,2898,2911,3269,3350,3354,3363,4988,5644,5645,5646,5733,5734,6751,6752,8001,116443,113,133,817,1325,1607,2786,5138,5330,5580,7476,8111,8321,10451,54331,54361,56477,59345,493	ADRA1B,CNR1,DRD5,GABRA3,GABRA5,GABRB1,GLRA2,GRIK2,GRM1,HRH1,HTR1A,HTR1E,HTR7,OPRM1,PRSS1,PRSS2,PRSS3,PTGER3,PTGER4,SSTR1,SSTR2,GLRA3,GRIN3A,ADCY7,ADM,CAMK2D,CORT,DGKB,GNG4,PDE2A,PLCB2,PRKCD,WNT7A,GPR68,FZD1,VAV3,GNG2,WNT4,CCL28,GNB4,ATP2B4
1_Member	KEGG Pathway	hsa04080	Neuroactive ligand-receptor interaction	-12.5858	-8.72239	23/277	147,1268,1816,2556,2558,2560,2742,2898,2911,3269,3350,3354,3363,4988,5644,5645,5646,5733,5734,6751,6752,8001,116443	ADRA1B,CNR1,DRD5,GABRA3,GABRA5,GABRB1,GLRA2,GRIK2,GRM1,HRH1,HTR1A,HTR1E,HTR7,OPRM1,PRSS1,PRSS2,PRSS3,PTGER3,PTGER4,SSTR1,SSTR2,GLRA3,GRIN3A
1_Member	KEGG Pathway	ko04080	Neuroactive ligand-receptor interaction	-12.5858	-8.72239	23/277	147,1268,1816,2556,2558,2560,2742,2898,2911,3269,3350,3354,3363,4988,5644,5645,5646,5733,5734,6751,6752,8001,116443	ADRA1B,CNR1,DRD5,GABRA3,GABRA5,GABRB1,GLRA2,GRIK2,GRM1,HRH1,HTR1A,HTR1E,HTR7,OPRM1,PRSS1,PRSS2,PRSS3,PTGER3,PTGER4,SSTR1,SSTR2,GLRA3,GRIN3A
1_Member	Reactome Gene Sets	R-HSA-372790	Signaling by GPCR	-8.87681	-5.5174	30/704	113,133,147,817,1268,1325,1607,1816,2786,2911,3269,3350,3354,3363,4988,5138,5330,5580,5733,5734,6751,6752,7476,8111,8321,10451,54331,54361,56477,59345	ADCY7,ADM,ADRA1B,CAMK2D,CNR1,CORT,DGKB,DRD5,GNG4,GRM1,HRH1,HTR1A,HTR1E,HTR7,OPRM1,PDE2A,PLCB2,PRKCD,PTGER3,PTGER4,SSTR1,SSTR2,WNT7A,GPR68,FZD1,VAV3,GNG2,WNT4,CCL28,GNB4
1_Member	Reactome Gene Sets	R-HSA-500792	GPCR ligand binding	-8.06805	-4.82258	23/467	133,147,1268,1325,1816,2786,2911,3269,3350,3354,3363,4988,5733,5734,6751,6752,7476,8111,8321,54331,54361,56477,59345	ADM,ADRA1B,CNR1,CORT,DRD5,GNG4,GRM1,HRH1,HTR1A,HTR1E,HTR7,OPRM1,PTGER3,PTGER4,SSTR1,SSTR2,WNT7A,GPR68,FZD1,GNG2,WNT4,CCL28,GNB4
1_Member	Reactome Gene Sets	R-HSA-388396	GPCR downstream signalling	-7.49209	-4.38794	26/629	113,133,147,817,1268,1325,1607,1816,2786,2911,3269,3354,3363,4988,5138,5330,5580,5733,5734,6751,6752,8111,10451,54331,56477,59345	ADCY7,ADM,ADRA1B,CAMK2D,CNR1,CORT,DGKB,DRD5,GNG4,GRM1,HRH1,HTR1E,HTR7,OPRM1,PDE2A,PLCB2,PRKCD,PTGER3,PTGER4,SSTR1,SSTR2,GPR68,VAV3,GNG2,CCL28,GNB4
1_Member	GO Biological Processes	GO:0007188	adenylate cyclase-modulating G protein-coupled receptor signaling pathway	-6.99965	-3.94126	15/230	113,133,147,493,1268,1325,1816,3350,3354,4988,5138,5733,5734,6752,54331	ADCY7,ADM,ADRA1B,ATP2B4,CNR1,CORT,DRD5,HTR1A,HTR1E,OPRM1,PDE2A,PTGER3,PTGER4,SSTR2,GNG2
1_Member	GO Biological Processes	GO:0007187	G protein-coupled receptor signaling pathway, coupled to cyclic nucleotide second messenger	-5.9424	-3.10259	8/67	1268,3269,3350,3354,3363,4988,6751,6752	CNR1,HRH1,HTR1A,HTR1E,HTR7,OPRM1,SSTR1,SSTR2
1_Member	Reactome Gene Sets	R-HSA-418594	G alpha (i) signalling events	-5.23239	-2.46403	15/318	113,817,1268,1325,2786,3354,4988,5330,5580,5733,6751,6752,54331,56477,59345	ADCY7,CAMK2D,CNR1,CORT,GNG4,HTR1E,OPRM1,PLCB2,PRKCD,PTGER3,SSTR1,SSTR2,GNG2,CCL28,GNB4
1_Member	GO Biological Processes	GO:0007189	adenylate cyclase-activating G protein-coupled receptor signaling pathway	-5.12585	-2.40463	10/143	113,133,147,493,1268,1816,4988,5733,5734,54331	ADCY7,ADM,ADRA1B,ATP2B4,CNR1,DRD5,OPRM1,PTGER3,PTGER4,GNG2
1_Member	Reactome Gene Sets	R-HSA-373076	Class A/1 (Rhodopsin-like receptors)	-4.96282	-2.3358	15/335	147,1268,1325,1816,3269,3350,3354,3363,4988,5733,5734,6751,6752,8111,56477	ADRA1B,CNR1,CORT,DRD5,HRH1,HTR1A,HTR1E,HTR7,OPRM1,PTGER3,PTGER4,SSTR1,SSTR2,GPR68,CCL28
1_Member	WikiPathways	WP455	GPCRs, Class A Rhodopsin-like	-4.91307	-2.30953	13/258	147,1268,1816,3269,3350,3354,3363,4988,5733,5734,6751,6752,8111	ADRA1B,CNR1,DRD5,HRH1,HTR1A,HTR1E,HTR7,OPRM1,PTGER3,PTGER4,SSTR1,SSTR2,GPR68
1_Member	GO Biological Processes	GO:0007193	adenylate cyclase-inhibiting G protein-coupled receptor signaling pathway	-4.20039	-1.76005	7/85	113,1325,3350,3354,4988,5138,6752	ADCY7,CORT,HTR1A,HTR1E,OPRM1,PDE2A,SSTR2
2_Summary	GO Biological Processes	GO:0007268	chemical synaptic transmission	-12.4797	-8.72239	35/686	793,869,1006,1268,1325,1607,1816,2556,2558,2560,2742,2898,2911,3269,3350,3354,3363,4885,4988,5786,6543,6804,7476,8001,9362,10590,22883,27253,56853,57497,57596,66000,116443,139411,341359,817,3725,4878,6324,55022,55800,4856	CALB1,CBLN1,CDH8,CNR1,CORT,DGKB,DRD5,GABRA3,GABRA5,GABRB1,GLRA2,GRIK2,GRM1,HRH1,HTR1A,HTR1E,HTR7,NPTX2,OPRM1,PTPRA,SLC8A2,STX1A,WNT7A,GLRA3,CPNE6,SCGN,CLSTN1,PCDH17,CELF4,LRFN2,BEGAIN,TMEM108,GRIN3A,PTCHD1,SYT10,CAMK2D,JUN,NPPA,SCN1B,PID1,SCN3B,CCN3
2_Member	GO Biological Processes	GO:0007268	chemical synaptic transmission	-12.4797	-8.72239	35/686	793,869,1006,1268,1325,1607,1816,2556,2558,2560,2742,2898,2911,3269,3350,3354,3363,4885,4988,5786,6543,6804,7476,8001,9362,10590,22883,27253,56853,57497,57596,66000,116443,139411,341359	CALB1,CBLN1,CDH8,CNR1,CORT,DGKB,DRD5,GABRA3,GABRA5,GABRB1,GLRA2,GRIK2,GRM1,HRH1,HTR1A,HTR1E,HTR7,NPTX2,OPRM1,PTPRA,SLC8A2,STX1A,WNT7A,GLRA3,CPNE6,SCGN,CLSTN1,PCDH17,CELF4,LRFN2,BEGAIN,TMEM108,GRIN3A,PTCHD1,SYT10
2_Member	GO Biological Processes	GO:0098916	anterograde trans-synaptic signaling	-12.4797	-8.72239	35/686	793,869,1006,1268,1325,1607,1816,2556,2558,2560,2742,2898,2911,3269,3350,3354,3363,4885,4988,5786,6543,6804,7476,8001,9362,10590,22883,27253,56853,57497,57596,66000,116443,139411,341359	CALB1,CBLN1,CDH8,CNR1,CORT,DGKB,DRD5,GABRA3,GABRA5,GABRB1,GLRA2,GRIK2,GRM1,HRH1,HTR1A,HTR1E,HTR7,NPTX2,OPRM1,PTPRA,SLC8A2,STX1A,WNT7A,GLRA3,CPNE6,SCGN,CLSTN1,PCDH17,CELF4,LRFN2,BEGAIN,TMEM108,GRIN3A,PTCHD1,SYT10
2_Member	GO Biological Processes	GO:0099537	trans-synaptic signaling	-12.3531	-8.69261	35/693	793,869,1006,1268,1325,1607,1816,2556,2558,2560,2742,2898,2911,3269,3350,3354,3363,4885,4988,5786,6543,6804,7476,8001,9362,10590,22883,27253,56853,57497,57596,66000,116443,139411,341359	CALB1,CBLN1,CDH8,CNR1,CORT,DGKB,DRD5,GABRA3,GABRA5,GABRB1,GLRA2,GRIK2,GRM1,HRH1,HTR1A,HTR1E,HTR7,NPTX2,OPRM1,PTPRA,SLC8A2,STX1A,WNT7A,GLRA3,CPNE6,SCGN,CLSTN1,PCDH17,CELF4,LRFN2,BEGAIN,TMEM108,GRIN3A,PTCHD1,SYT10
2_Member	GO Biological Processes	GO:0099536	synaptic signaling	-11.9654	-8.38412	35/715	793,869,1006,1268,1325,1607,1816,2556,2558,2560,2742,2898,2911,3269,3350,3354,3363,4885,4988,5786,6543,6804,7476,8001,9362,10590,22883,27253,56853,57497,57596,66000,116443,139411,341359	CALB1,CBLN1,CDH8,CNR1,CORT,DGKB,DRD5,GABRA3,GABRA5,GABRB1,GLRA2,GRIK2,GRM1,HRH1,HTR1A,HTR1E,HTR7,NPTX2,OPRM1,PTPRA,SLC8A2,STX1A,WNT7A,GLRA3,CPNE6,SCGN,CLSTN1,PCDH17,CELF4,LRFN2,BEGAIN,TMEM108,GRIN3A,PTCHD1,SYT10
2_Member	GO Biological Processes	GO:0060078	regulation of postsynaptic membrane potential	-10.1395	-6.68321	15/136	869,2556,2558,2560,2742,2898,2911,4988,6543,6804,7476,8001,56853,66000,116443	CBLN1,GABRA3,GABRA5,GABRB1,GLRA2,GRIK2,GRM1,OPRM1,SLC8A2,STX1A,WNT7A,GLRA3,CELF4,TMEM108,GRIN3A
2_Member	GO Biological Processes	GO:0042391	regulation of membrane potential	-8.01918	-4.80589	22/431	817,869,1268,2556,2558,2560,2742,2898,2911,3725,4878,4988,6324,6543,6804,7476,8001,55022,55800,56853,66000,116443	CAMK2D,CBLN1,CNR1,GABRA3,GABRA5,GABRB1,GLRA2,GRIK2,GRM1,JUN,NPPA,OPRM1,SCN1B,SLC8A2,STX1A,WNT7A,GLRA3,PID1,SCN3B,CELF4,TMEM108,GRIN3A
2_Member	GO Biological Processes	GO:0050804	modulation of chemical synaptic transmission	-7.79716	-4.62337	21/405	793,869,1268,1607,1816,2898,2911,3269,4885,5786,6543,6804,7476,10590,22883,27253,56853,57497,57596,66000,116443	CALB1,CBLN1,CNR1,DGKB,DRD5,GRIK2,GRM1,HRH1,NPTX2,PTPRA,SLC8A2,STX1A,WNT7A,SCGN,CLSTN1,PCDH17,CELF4,LRFN2,BEGAIN,TMEM108,GRIN3A
2_Member	GO Biological Processes	GO:0099177	regulation of trans-synaptic signaling	-7.77867	-4.62337	21/406	793,869,1268,1607,1816,2898,2911,3269,4885,5786,6543,6804,7476,10590,22883,27253,56853,57497,57596,66000,116443	CALB1,CBLN1,CNR1,DGKB,DRD5,GRIK2,GRM1,HRH1,NPTX2,PTPRA,SLC8A2,STX1A,WNT7A,SCGN,CLSTN1,PCDH17,CELF4,LRFN2,BEGAIN,TMEM108,GRIN3A
2_Member	GO Biological Processes	GO:0060079	excitatory postsynaptic potential	-6.54933	-3.57012	10/100	869,2742,2898,4988,6543,6804,7476,8001,56853,66000	CBLN1,GLRA2,GRIK2,OPRM1,SLC8A2,STX1A,WNT7A,GLRA3,CELF4,TMEM108
2_Member	GO Biological Processes	GO:0099565	chemical synaptic transmission, postsynaptic	-6.34987	-3.43761	10/105	869,2742,2898,4988,6543,6804,7476,8001,56853,66000	CBLN1,GLRA2,GRIK2,OPRM1,SLC8A2,STX1A,WNT7A,GLRA3,CELF4,TMEM108
2_Member	GO Biological Processes	GO:0031644	regulation of nervous system process	-6.17386	-3.29156	11/137	869,2911,4856,4885,4988,6543,6804,7476,56853,57596,66000	CBLN1,GRM1,CCN3,NPTX2,OPRM1,SLC8A2,STX1A,WNT7A,CELF4,BEGAIN,TMEM108
2_Member	GO Biological Processes	GO:0098815	modulation of excitatory postsynaptic potential	-4.92827	-2.31704	6/44	869,6543,6804,7476,56853,66000	CBLN1,SLC8A2,STX1A,WNT7A,CELF4,TMEM108
3_Summary	Reactome Gene Sets	R-HSA-112316	Neuronal System	-11.4492	-7.93484	26/410	113,817,2556,2558,2560,2742,2786,2898,2911,3755,5330,5792,6804,7277,7280,8001,27165,54331,57497,57596,59345,80059,116443,170850,341359,347688,1268,4988,5138,5580,133,1816,3363,5734,3350,3354,7476,8321,54361,4792,10451,56477,340719,147,1607,3269,8111,366,22883,493,6543,3725,1,2,2888,2994,4602,1592,2289,5467,80820	ADCY7,CAMK2D,GABRA3,GABRA5,GABRB1,GLRA2,GNG4,GRIK2,GRM1,KCNG1,PLCB2,PTPRF,STX1A,TUBA4A,TUBB2A,GLRA3,GLS2,GNG2,LRFN2,BEGAIN,GNB4,LRRTM4,GRIN3A,KCNG3,SYT10,TUBB8,CNR1,OPRM1,PDE2A,PRKCD,ADM,DRD5,HTR7,PTGER4,HTR1A,HTR1E,WNT7A,FZD1,WNT4,NFKBIA,VAV3,CCL28,NANOS1,ADRA1B,DGKB,HRH1,GPR68,AQP9,CLSTN1,ATP2B4,SLC8A2,JUN,A1BG,A2M,GRB14,GYPB,MYB,CYP26A1,FKBP5,PPARD,EEPD1
3_Member	Reactome Gene Sets	R-HSA-112316	Neuronal System	-11.4492	-7.93484	26/410	113,817,2556,2558,2560,2742,2786,2898,2911,3755,5330,5792,6804,7277,7280,8001,27165,54331,57497,57596,59345,80059,116443,170850,341359,347688	ADCY7,CAMK2D,GABRA3,GABRA5,GABRB1,GLRA2,GNG4,GRIK2,GRM1,KCNG1,PLCB2,PTPRF,STX1A,TUBA4A,TUBB2A,GLRA3,GLS2,GNG2,LRFN2,BEGAIN,GNB4,LRRTM4,GRIN3A,KCNG3,SYT10,TUBB8
3_Member	Reactome Gene Sets	R-HSA-112314	Neurotransmitter receptors and postsynaptic signal transmission	-8.53516	-5.21713	16/205	113,817,2556,2558,2560,2742,2786,2898,5330,7277,7280,8001,54331,59345,116443,347688	ADCY7,CAMK2D,GABRA3,GABRA5,GABRB1,GLRA2,GNG4,GRIK2,PLCB2,TUBA4A,TUBB2A,GLRA3,GNG2,GNB4,GRIN3A,TUBB8
3_Member	Reactome Gene Sets	R-HSA-112315	Transmission across Chemical Synapses	-8.43306	-5.15283	18/270	113,817,2556,2558,2560,2742,2786,2898,5330,6804,7277,7280,8001,27165,54331,59345,116443,347688	ADCY7,CAMK2D,GABRA3,GABRA5,GABRB1,GLRA2,GNG4,GRIK2,PLCB2,STX1A,TUBA4A,TUBB2A,GLRA3,GLS2,GNG2,GNB4,GRIN3A,TUBB8
3_Member	KEGG Pathway	ko04723	Retrograde endocannabinoid signaling	-6.50852	-3.54704	10/101	113,1268,2556,2558,2560,2786,2911,5330,54331,59345	ADCY7,CNR1,GABRA3,GABRA5,GABRB1,GNG4,GRM1,PLCB2,GNG2,GNB4
3_Member	KEGG Pathway	ko05032	Morphine addiction	-5.91044	-3.09509	9/91	113,2556,2558,2560,2786,4988,5138,54331,59345	ADCY7,GABRA3,GABRA5,GABRB1,GNG4,OPRM1,PDE2A,GNG2,GNB4
3_Member	KEGG Pathway	hsa05032	Morphine addiction	-5.87016	-3.06705	9/92	113,2556,2558,2560,2786,4988,5138,54331,59345	ADCY7,GABRA3,GABRA5,GABRB1,GNG4,OPRM1,PDE2A,GNG2,GNB4
3_Member	Reactome Gene Sets	R-HSA-977443	GABA receptor activation	-5.19872	-2.44136	7/60	113,2556,2558,2560,2786,54331,59345	ADCY7,GABRA3,GABRA5,GABRB1,GNG4,GNG2,GNB4
3_Member	KEGG Pathway	ko04724	Glutamatergic synapse	-5.09486	-2.38866	9/114	113,2786,2898,2911,5330,27165,54331,59345,116443	ADCY7,GNG4,GRIK2,GRM1,PLCB2,GLS2,GNG2,GNB4,GRIN3A
3_Member	KEGG Pathway	ko04727	GABAergic synapse	-5.04098	-2.35542	8/88	113,2556,2558,2560,2786,27165,54331,59345	ADCY7,GABRA3,GABRA5,GABRB1,GNG4,GLS2,GNG2,GNB4
3_Member	KEGG Pathway	hsa04724	Glutamatergic synapse	-5.00291	-2.3358	9/117	113,2786,2898,2911,5330,27165,54331,59345,116443	ADCY7,GNG4,GRIK2,GRM1,PLCB2,GLS2,GNG2,GNB4,GRIN3A
3_Member	KEGG Pathway	hsa04727	GABAergic synapse	-4.93284	-2.31704	8/91	113,2556,2558,2560,2786,27165,54331,59345	ADCY7,GABRA3,GABRA5,GABRB1,GNG4,GLS2,GNG2,GNB4
3_Member	Reactome Gene Sets	R-HSA-111885	Opioid Signalling	-4.89771	-2.30172	8/92	113,817,2786,4988,5330,5580,54331,59345	ADCY7,CAMK2D,GNG4,OPRM1,PLCB2,PRKCD,GNG2,GNB4
3_Member	KEGG Pathway	hsa04723	Retrograde endocannabinoid signaling	-4.53847	-1.99196	10/167	113,1268,2556,2558,2560,2786,2911,5330,54331,59345	ADCY7,CNR1,GABRA3,GABRA5,GABRB1,GNG4,GRM1,PLCB2,GNG2,GNB4
3_Member	Reactome Gene Sets	R-HSA-451326	Activation of kainate receptors upon glutamate binding	-4.48405	-1.95714	5/32	2786,2898,5330,54331,59345	GNG4,GRIK2,PLCB2,GNG2,GNB4
3_Member	Reactome Gene Sets	R-HSA-418555	G alpha (s) signalling events	-4.26104	-1.81011	9/145	113,133,1816,2786,3363,5138,5734,54331,59345	ADCY7,ADM,DRD5,GNG4,HTR7,PDE2A,PTGER4,GNG2,GNB4
3_Member	Reactome Gene Sets	R-HSA-418217	G beta:gamma signalling through PLC beta	-4.11672	-1.6918	4/20	2786,5330,54331,59345	GNG4,PLCB2,GNG2,GNB4
3_Member	KEGG Pathway	hsa04726	Serotonergic synapse	-4.09031	-1.67538	8/119	2560,2786,3350,3354,3363,5330,54331,59345	GABRB1,GNG4,HTR1A,HTR1E,HTR7,PLCB2,GNG2,GNB4
3_Member	Reactome Gene Sets	R-HSA-500657	Presynaptic function of Kainate receptors	-4.02895	-1.62857	4/21	2786,5330,54331,59345	GNG4,PLCB2,GNG2,GNB4
3_Member	Reactome Gene Sets	R-HSA-373080	Class B/2 (Secretin family receptors)	-3.89355	-1.54385	7/95	133,2786,7476,8321,54331,54361,59345	ADM,GNG4,WNT7A,FZD1,GNG2,WNT4,GNB4
3_Member	WikiPathways	WP3929	Chemokine signaling pathway	-3.83062	-1.50462	9/165	113,2786,4792,5330,5580,10451,54331,56477,59345	ADCY7,GNG4,NFKBIA,PLCB2,PRKCD,VAV3,GNG2,CCL28,GNB4
3_Member	Reactome Gene Sets	R-HSA-202040	G-protein activation	-3.79165	-1.48914	4/24	2786,4988,54331,59345	GNG4,OPRM1,GNG2,GNB4
3_Member	KEGG Pathway	hsa04713	circadian entrainment	-3.75414	-1.46105	7/100	113,817,2786,5330,54331,59345,340719	ADCY7,CAMK2D,GNG4,PLCB2,GNG2,GNB4,NANOS1
3_Member	Reactome Gene Sets	R-HSA-9660821	ADORA2B mediated anti-inflammatory cytokines production	-3.73142	-1.44755	8/134	113,133,1816,2786,3363,5734,54331,59345	ADCY7,ADM,DRD5,GNG4,HTR7,PTGER4,GNG2,GNB4
3_Member	Reactome Gene Sets	R-HSA-418597	G alpha (z) signalling events	-3.62084	-1.36018	5/48	113,2786,5580,54331,59345	ADCY7,GNG4,PRKCD,GNG2,GNB4
3_Member	Reactome Gene Sets	R-HSA-416476	G alpha (q) signalling events	-3.61123	-1.36018	10/216	147,1607,2786,2911,3269,5330,5580,8111,54331,59345	ADRA1B,DGKB,GNG4,GRM1,HRH1,PLCB2,PRKCD,GPR68,GNG2,GNB4
3_Member	KEGG Pathway	hsa04062	Chemokine signaling pathway	-3.51299	-1.31194	9/182	113,2786,4792,5330,5580,10451,54331,56477,59345	ADCY7,GNG4,NFKBIA,PLCB2,PRKCD,VAV3,GNG2,CCL28,GNB4
3_Member	KEGG Pathway	ko04062	Chemokine signaling pathway	-3.51299	-1.31194	9/182	113,2786,4792,5330,5580,10451,54331,56477,59345	ADCY7,GNG4,NFKBIA,PLCB2,PRKCD,VAV3,GNG2,CCL28,GNB4
3_Member	Reactome Gene Sets	R-HSA-445717	Aquaporin-mediated transport	-3.45616	-1.27859	5/52	113,366,2786,54331,59345	ADCY7,AQP9,GNG4,GNG2,GNB4
3_Member	KEGG Pathway	hsa04725	Cholinergic synapse	-3.38142	-1.21513	7/115	113,817,2786,5330,22883,54331,59345	ADCY7,CAMK2D,GNG4,PLCB2,CLSTN1,GNG2,GNB4
3_Member	Reactome Gene Sets	R-HSA-397795	G-protein beta:gamma signalling	-3.29415	-1.16518	4/32	2786,5330,54331,59345	GNG4,PLCB2,GNG2,GNB4
3_Member	Reactome Gene Sets	R-HSA-163359	Glucagon signaling in metabolic regulation	-3.24202	-1.12065	4/33	113,2786,54331,59345	ADCY7,GNG4,GNG2,GNB4
3_Member	Reactome Gene Sets	R-HSA-418346	Platelet homeostasis	-3.22977	-1.11613	6/88	493,2786,5138,6543,54331,59345	ATP2B4,GNG4,PDE2A,SLC8A2,GNG2,GNB4
3_Member	Reactome Gene Sets	R-HSA-9658195	Leishmania infection	-3.06162	-0.993071	10/254	113,133,1816,2786,3363,3725,5734,10451,54331,59345	ADCY7,ADM,DRD5,GNG4,HTR7,JUN,PTGER4,VAV3,GNG2,GNB4
3_Member	Reactome Gene Sets	R-HSA-9662851	Anti-inflammatory response favouring Leishmania parasite infection	-3.05802	-0.993071	8/169	113,133,1816,2786,3363,5734,54331,59345	ADCY7,ADM,DRD5,GNG4,HTR7,PTGER4,GNG2,GNB4
3_Member	Reactome Gene Sets	R-HSA-9664433	Leishmania parasite growth and survival	-3.05802	-0.993071	8/169	113,133,1816,2786,3363,5734,54331,59345	ADCY7,ADM,DRD5,GNG4,HTR7,PTGER4,GNG2,GNB4
3_Member	Reactome Gene Sets	R-HSA-109582	Hemostasis	-2.95056	-0.919244	17/621	1,2,493,1607,2786,2888,2994,4602,5138,5580,6543,7277,7280,10451,54331,59345,347688	A1BG,A2M,ATP2B4,DGKB,GNG4,GRB14,GYPB,MYB,PDE2A,PRKCD,SLC8A2,TUBA4A,TUBB2A,VAV3,GNG2,GNB4,TUBB8
3_Member	Reactome Gene Sets	R-HSA-8964315	G beta:gamma signalling through BTK	-2.94622	-0.919244	3/18	2786,54331,59345	GNG4,GNG2,GNB4
3_Member	Reactome Gene Sets	R-HSA-392851	Prostacyclin signalling through prostacyclin receptor	-2.87534	-0.87961	3/19	2786,54331,59345	GNG4,GNG2,GNB4
3_Member	Reactome Gene Sets	R-HSA-8964616	G beta:gamma signalling through CDC42	-2.80852	-0.835668	3/20	2786,54331,59345	GNG4,GNG2,GNB4
3_Member	Reactome Gene Sets	R-HSA-432040	Vasopressin regulates renal water homeostasis via Aquaporins	-2.80239	-0.835668	4/43	113,2786,54331,59345	ADCY7,GNG4,GNG2,GNB4
3_Member	Reactome Gene Sets	R-HSA-977444	GABA B receptor activation	-2.80239	-0.835668	4/43	113,2786,54331,59345	ADCY7,GNG4,GNG2,GNB4
3_Member	Reactome Gene Sets	R-HSA-991365	Activation of GABAB receptors	-2.80239	-0.835668	4/43	113,2786,54331,59345	ADCY7,GNG4,GNG2,GNB4
3_Member	KEGG Pathway	hsa04371	Apelin signaling pathway	-2.77132	-0.809842	7/146	113,2786,5330,6543,54331,59345,340719	ADCY7,GNG4,PLCB2,SLC8A2,GNG2,GNB4,NANOS1
3_Member	Reactome Gene Sets	R-HSA-163685	Integration of energy metabolism	-2.76616	-0.806412	6/108	113,2786,5330,6804,54331,59345	ADCY7,GNG4,PLCB2,STX1A,GNG2,GNB4
3_Member	Reactome Gene Sets	R-HSA-392170	ADP signalling through P2Y purinoceptor 12	-2.6854	-0.755734	3/22	2786,54331,59345	GNG4,GNG2,GNB4
3_Member	Reactome Gene Sets	R-HSA-422356	Regulation of insulin secretion	-2.65353	-0.730277	5/78	2786,5330,6804,54331,59345	GNG4,PLCB2,STX1A,GNG2,GNB4
3_Member	Reactome Gene Sets	R-HSA-416482	G alpha (12/13) signalling events	-2.60531	-0.696194	5/80	147,2786,10451,54331,59345	ADRA1B,GNG4,VAV3,GNG2,GNB4
3_Member	Reactome Gene Sets	R-HSA-428930	Thromboxane signalling through TP receptor	-2.5742	-0.674176	3/24	2786,54331,59345	GNG4,GNG2,GNB4
3_Member	Reactome Gene Sets	R-HSA-392451	G beta:gamma signalling through PI3Kgamma	-2.52243	-0.641574	3/25	2786,54331,59345	GNG4,GNG2,GNB4
3_Member	Reactome Gene Sets	R-HSA-418592	ADP signalling through P2Y purinoceptor 1	-2.52243	-0.641574	3/25	2786,54331,59345	GNG4,GNG2,GNB4
3_Member	Reactome Gene Sets	R-HSA-76002	Platelet activation, signaling and aggregation	-2.4013	-0.57336	9/263	1,2,1607,2786,5580,7277,10451,54331,59345	A1BG,A2M,DGKB,GNG4,PRKCD,TUBA4A,VAV3,GNG2,GNB4
3_Member	Reactome Gene Sets	R-HSA-400042	Adrenaline,noradrenaline inhibits insulin secretion	-2.38002	-0.56065	3/28	2786,54331,59345	GNG4,GNG2,GNB4
3_Member	KEGG Pathway	ko04728	Dopaminergic synapse	-2.36477	-0.555815	6/130	817,1816,2786,5330,54331,59345	CAMK2D,DRD5,GNG4,PLCB2,GNG2,GNB4
3_Member	Reactome Gene Sets	R-HSA-390466	Chaperonin-mediated protein folding	-2.36378	-0.555815	5/91	2786,7277,7280,54331,59345	GNG4,TUBA4A,TUBB2A,GNG2,GNB4
3_Member	Reactome Gene Sets	R-HSA-1296041	Activation of G protein gated Potassium channels	-2.33633	-0.543939	3/29	2786,54331,59345	GNG4,GNG2,GNB4
3_Member	Reactome Gene Sets	R-HSA-1296059	G protein gated Potassium channels	-2.33633	-0.543939	3/29	2786,54331,59345	GNG4,GNG2,GNB4
3_Member	Reactome Gene Sets	R-HSA-997272	Inhibition of voltage gated Ca2+ channels via Gbeta/gamma subunits	-2.33633	-0.543939	3/29	2786,54331,59345	GNG4,GNG2,GNB4
3_Member	KEGG Pathway	hsa04728	Dopaminergic synapse	-2.33257	-0.542531	6/132	817,1816,2786,5330,54331,59345	CAMK2D,DRD5,GNG4,PLCB2,GNG2,GNB4
3_Member	Reactome Gene Sets	R-HSA-391251	Protein folding	-2.24658	-0.489222	5/97	2786,7277,7280,54331,59345	GNG4,TUBA4A,TUBB2A,GNG2,GNB4
3_Member	Reactome Gene Sets	R-HSA-4086398	Ca2+ pathway	-2.22237	-0.477853	4/62	2786,5330,54331,59345	GNG4,PLCB2,GNG2,GNB4
3_Member	Reactome Gene Sets	R-HSA-456926	Thrombin signalling through proteinase activated receptors (PARs)	-2.2148	-0.474479	3/32	2786,54331,59345	GNG4,GNG2,GNB4
3_Member	Reactome Gene Sets	R-HSA-392518	Signal amplification	-2.17714	-0.457204	3/33	2786,54331,59345	GNG4,GNG2,GNB4
3_Member	Reactome Gene Sets	R-HSA-420092	Glucagon-type ligand receptors	-2.17714	-0.457204	3/33	2786,54331,59345	GNG4,GNG2,GNB4
3_Member	Reactome Gene Sets	R-HSA-1296071	Potassium Channels	-2.13802	-0.431331	5/103	2786,3755,54331,59345,170850	GNG4,KCNG1,GNG2,GNB4,KCNG3
3_Member	Reactome Gene Sets	R-HSA-3858494	Beta-catenin independent WNT signaling	-2.12348	-0.423026	6/146	2786,5330,8321,54331,54361,59345	GNG4,PLCB2,FZD1,GNG2,WNT4,GNB4
3_Member	Reactome Gene Sets	R-HSA-1296065	Inwardly rectifying K+ channels	-2.10554	-0.411705	3/35	2786,54331,59345	GNG4,GNG2,GNB4
3_Member	Reactome Gene Sets	R-HSA-9006931	Signaling by Nuclear Receptors	-2.0489	-0.378792	9/299	1592,2289,2786,3725,4602,5467,54331,59345,80820	CYP26A1,FKBP5,GNG4,JUN,MYB,PPARD,GNG2,GNB4,EEPD1
3_Member	Reactome Gene Sets	R-HSA-6814122	Cooperation of PDCL (PhLP1) and TRiC/CCT in G-protein beta folding	-2.00646	-0.352155	3/38	2786,54331,59345	GNG4,GNG2,GNB4
4_Summary	GO Biological Processes	GO:0044057	regulation of system process	-9.3154	-5.91023	28/592	133,147,493,817,869,2911,3269,3350,3488,4856,4878,4885,4988,5733,6324,6543,6588,6752,6804,7138,7476,8013,55800,56853,57596,66000,90523,114907,3363,4703,7170,55959	ADM,ADRA1B,ATP2B4,CAMK2D,CBLN1,GRM1,HRH1,HTR1A,IGFBP5,CCN3,NPPA,NPTX2,OPRM1,PTGER3,SCN1B,SLC8A2,SLN,SSTR2,STX1A,TNNT1,WNT7A,NR4A3,SCN3B,CELF4,BEGAIN,TMEM108,MLIP,FBXO32,HTR7,NEB,TPM3,SULF2
4_Member	GO Biological Processes	GO:0044057	regulation of system process	-9.3154	-5.91023	28/592	133,147,493,817,869,2911,3269,3350,3488,4856,4878,4885,4988,5733,6324,6543,6588,6752,6804,7138,7476,8013,55800,56853,57596,66000,90523,114907	ADM,ADRA1B,ATP2B4,CAMK2D,CBLN1,GRM1,HRH1,HTR1A,IGFBP5,CCN3,NPPA,NPTX2,OPRM1,PTGER3,SCN1B,SLC8A2,SLN,SSTR2,STX1A,TNNT1,WNT7A,NR4A3,SCN3B,CELF4,BEGAIN,TMEM108,MLIP,FBXO32
4_Member	GO Biological Processes	GO:0003012	muscle system process	-5.1206	-2.40463	18/453	147,493,817,3363,3488,4703,4878,5733,6324,6588,6752,7138,7170,8013,55800,55959,90523,114907	ADRA1B,ATP2B4,CAMK2D,HTR7,IGFBP5,NEB,NPPA,PTGER3,SCN1B,SLN,SSTR2,TNNT1,TPM3,NR4A3,SCN3B,SULF2,MLIP,FBXO32
4_Member	GO Biological Processes	GO:0043502	regulation of muscle adaptation	-3.83676	-1.50462	7/97	493,817,3488,7138,8013,90523,114907	ATP2B4,CAMK2D,IGFBP5,TNNT1,NR4A3,MLIP,FBXO32
4_Member	GO Biological Processes	GO:0090257	regulation of muscle system process	-3.8316	-1.50462	11/243	147,493,817,3488,4878,6588,6752,7138,8013,90523,114907	ADRA1B,ATP2B4,CAMK2D,IGFBP5,NPPA,SLN,SSTR2,TNNT1,NR4A3,MLIP,FBXO32
4_Member	GO Biological Processes	GO:0006936	muscle contraction	-3.54655	-1.33326	13/352	147,493,817,3363,4703,4878,5733,6324,6752,7138,7170,55800,55959	ADRA1B,ATP2B4,CAMK2D,HTR7,NEB,NPPA,PTGER3,SCN1B,SSTR2,TNNT1,TPM3,SCN3B,SULF2
4_Member	GO Biological Processes	GO:0014745	negative regulation of muscle adaptation	-3.38274	-1.21513	3/13	493,3488,90523	ATP2B4,IGFBP5,MLIP
4_Member	GO Biological Processes	GO:0043500	muscle adaptation	-3.31393	-1.17723	7/118	493,817,3488,7138,8013,90523,114907	ATP2B4,CAMK2D,IGFBP5,TNNT1,NR4A3,MLIP,FBXO32
4_Member	GO Biological Processes	GO:0014743	regulation of muscle hypertrophy	-2.83468	-0.855478	5/71	493,817,3488,8013,90523	ATP2B4,CAMK2D,IGFBP5,NR4A3,MLIP
4_Member	GO Biological Processes	GO:0044342	type B pancreatic cell proliferation	-2.74532	-0.800876	3/21	3488,4856,8013	IGFBP5,CCN3,NR4A3
4_Member	GO Biological Processes	GO:0014888	striated muscle adaptation	-2.49688	-0.630223	4/52	493,3488,7138,90523	ATP2B4,IGFBP5,TNNT1,MLIP
4_Member	GO Biological Processes	GO:0014897	striated muscle hypertrophy	-2.20949	-0.472602	5/99	493,817,3488,8013,90523	ATP2B4,CAMK2D,IGFBP5,NR4A3,MLIP
4_Member	GO Biological Processes	GO:0014896	muscle hypertrophy	-2.17331	-0.456356	5/101	493,817,3488,8013,90523	ATP2B4,CAMK2D,IGFBP5,NR4A3,MLIP
4_Member	GO Biological Processes	GO:0010611	regulation of cardiac muscle hypertrophy	-2.08167	-0.399854	4/68	493,817,8013,90523	ATP2B4,CAMK2D,NR4A3,MLIP
4_Member	GO Biological Processes	GO:0014741	negative regulation of muscle hypertrophy	-2.07147	-0.394198	3/36	493,3488,90523	ATP2B4,IGFBP5,MLIP
5_Summary	GO Biological Processes	GO:0050808	synapse organization	-7.66893	-4.53997	21/412	869,1006,1007,1501,1607,1948,2239,5792,6543,6585,7476,8321,10160,10882,22883,27253,57497,66000,84623,266727,347902,1008,5786,11187,54361,143162,57526,64881	CBLN1,CDH8,CDH9,CTNND2,DGKB,EFNB2,GPC4,PTPRF,SLC8A2,SLIT1,WNT7A,FZD1,FARP1,C1QL1,CLSTN1,PCDH17,LRFN2,TMEM108,KIRREL3,MDGA1,AMIGO2,CDH10,PTPRA,PKP3,WNT4,FRMPD2,PCDH19,PCDH20
5_Member	GO Biological Processes	GO:0050808	synapse organization	-7.66893	-4.53997	21/412	869,1006,1007,1501,1607,1948,2239,5792,6543,6585,7476,8321,10160,10882,22883,27253,57497,66000,84623,266727,347902	CBLN1,CDH8,CDH9,CTNND2,DGKB,EFNB2,GPC4,PTPRF,SLC8A2,SLIT1,WNT7A,FZD1,FARP1,C1QL1,CLSTN1,PCDH17,LRFN2,TMEM108,KIRREL3,MDGA1,AMIGO2
5_Member	GO Biological Processes	GO:0007416	synapse assembly	-6.85224	-3.81504	13/173	869,1007,1948,2239,6585,7476,8321,10160,22883,27253,84623,266727,347902	CBLN1,CDH9,EFNB2,GPC4,SLIT1,WNT7A,FZD1,FARP1,CLSTN1,PCDH17,KIRREL3,MDGA1,AMIGO2
5_Member	GO Biological Processes	GO:0034329	cell junction assembly	-6.7529	-3.7359	20/426	869,1006,1007,1008,1501,1948,2239,5786,6585,7476,8321,10160,11187,22883,27253,54361,84623,143162,266727,347902	CBLN1,CDH8,CDH9,CDH10,CTNND2,EFNB2,GPC4,PTPRA,SLIT1,WNT7A,FZD1,FARP1,PKP3,CLSTN1,PCDH17,WNT4,KIRREL3,FRMPD2,MDGA1,AMIGO2
5_Member	GO Biological Processes	GO:0034330	cell junction organization	-6.57385	-3.57616	26/701	869,1006,1007,1008,1501,1607,1948,2239,5786,5792,6543,6585,7476,8321,10160,10882,11187,22883,27253,54361,57497,66000,84623,143162,266727,347902	CBLN1,CDH8,CDH9,CDH10,CTNND2,DGKB,EFNB2,GPC4,PTPRA,PTPRF,SLC8A2,SLIT1,WNT7A,FZD1,FARP1,C1QL1,PKP3,CLSTN1,PCDH17,WNT4,LRFN2,TMEM108,KIRREL3,FRMPD2,MDGA1,AMIGO2
5_Member	GO Biological Processes	GO:0099054	presynapse assembly	-5.93052	-3.10259	7/47	869,1948,2239,7476,8321,27253,266727	CBLN1,EFNB2,GPC4,WNT7A,FZD1,PCDH17,MDGA1
5_Member	GO Biological Processes	GO:0099172	presynapse organization	-5.74265	-2.95143	7/50	869,1948,2239,7476,8321,27253,266727	CBLN1,EFNB2,GPC4,WNT7A,FZD1,PCDH17,MDGA1
5_Member	GO Biological Processes	GO:0099560	synaptic membrane adhesion	-5.0336	-2.35542	5/25	1007,2239,5792,27253,266727	CDH9,GPC4,PTPRF,PCDH17,MDGA1
5_Member	GO Biological Processes	GO:0098742	cell-cell adhesion via plasma-membrane adhesion molecules	-4.62116	-2.06109	13/275	869,1006,1007,1008,2239,5792,22883,27253,57526,64881,84623,266727,347902	CBLN1,CDH8,CDH9,CDH10,GPC4,PTPRF,CLSTN1,PCDH17,PCDH19,PCDH20,KIRREL3,MDGA1,AMIGO2
5_Member	GO Biological Processes	GO:0051963	regulation of synapse assembly	-3.89355	-1.54385	7/95	869,2239,6585,7476,22883,266727,347902	CBLN1,GPC4,SLIT1,WNT7A,CLSTN1,MDGA1,AMIGO2
5_Member	GO Biological Processes	GO:0050807	regulation of synapse organization	-3.81175	-1.49869	10/204	869,1006,1607,2239,6585,7476,22883,57497,266727,347902	CBLN1,CDH8,DGKB,GPC4,SLIT1,WNT7A,CLSTN1,LRFN2,MDGA1,AMIGO2
5_Member	GO Biological Processes	GO:0007156	homophilic cell adhesion via plasma membrane adhesion molecules	-3.75229	-1.46105	9/169	1006,1007,1008,22883,27253,57526,64881,84623,347902	CDH8,CDH9,CDH10,CLSTN1,PCDH17,PCDH19,PCDH20,KIRREL3,AMIGO2
5_Member	GO Biological Processes	GO:0050803	regulation of synapse structure or activity	-3.64364	-1.37413	10/214	869,1006,1607,2239,6585,7476,22883,57497,266727,347902	CBLN1,CDH8,DGKB,GPC4,SLIT1,WNT7A,CLSTN1,LRFN2,MDGA1,AMIGO2
5_Member	GO Biological Processes	GO:0099174	regulation of presynapse organization	-3.34815	-1.19825	4/31	869,2239,7476,266727	CBLN1,GPC4,WNT7A,MDGA1
5_Member	GO Biological Processes	GO:1905606	regulation of presynapse assembly	-3.34815	-1.19825	4/31	869,2239,7476,266727	CBLN1,GPC4,WNT7A,MDGA1
5_Member	GO Biological Processes	GO:1901888	regulation of cell junction assembly	-3.29453	-1.16518	9/195	869,2239,5786,6585,7476,22883,54361,266727,347902	CBLN1,GPC4,PTPRA,SLIT1,WNT7A,CLSTN1,WNT4,MDGA1,AMIGO2
5_Member	GO Biological Processes	GO:0051965	positive regulation of synapse assembly	-2.32547	-0.537764	4/58	869,7476,22883,347902	CBLN1,WNT7A,CLSTN1,AMIGO2
5_Member	GO Biological Processes	GO:1901890	positive regulation of cell junction assembly	-2.26548	-0.498243	5/96	869,7476,22883,54361,347902	CBLN1,WNT7A,CLSTN1,WNT4,AMIGO2
6_Summary	KEGG Pathway	hsa04024	cAMP signaling pathway	-7.0994	-4.01873	15/226	113,493,817,1816,3350,3354,3725,4792,4878,5733,6751,6752,10451,22883,116443,4602,10522,55800	ADCY7,ATP2B4,CAMK2D,DRD5,HTR1A,HTR1E,JUN,NFKBIA,NPPA,PTGER3,SSTR1,SSTR2,VAV3,CLSTN1,GRIN3A,MYB,DEAF1,SCN3B
6_Member	KEGG Pathway	hsa04024	cAMP signaling pathway	-7.0994	-4.01873	15/226	113,493,817,1816,3350,3354,3725,4792,4878,5733,6751,6752,10451,22883,116443	ADCY7,ATP2B4,CAMK2D,DRD5,HTR1A,HTR1E,JUN,NFKBIA,NPPA,PTGER3,SSTR1,SSTR2,VAV3,CLSTN1,GRIN3A
6_Member	KEGG Pathway	ko04024	cAMP signaling pathway	-6.17752	-3.29156	13/198	113,493,817,1816,3350,3354,3725,4792,5733,6751,6752,10451,116443	ADCY7,ATP2B4,CAMK2D,DRD5,HTR1A,HTR1E,JUN,NFKBIA,PTGER3,SSTR1,SSTR2,VAV3,GRIN3A
6_Member	WikiPathways	WP706	Sudden Infant Death Syndrome (SIDS) Susceptibility Pathways	-2.51715	-0.637956	7/162	3350,3725,4602,6751,6752,10522,55800	HTR1A,JUN,MYB,SSTR1,SSTR2,DEAF1,SCN3B
7_Summary	GO Biological Processes	GO:0007420	brain development	-6.46834	-3.5239	26/710	493,869,1063,1767,2523,2558,6585,6586,6751,6752,7301,7476,8321,8704,54361,56934,57526,59345,66000,84623,139411,266727,317762,340719,347902,374946,2560,6324	ATP2B4,CBLN1,CENPF,DNAH5,FUT1,GABRA5,SLIT1,SLIT3,SSTR1,SSTR2,TYRO3,WNT7A,FZD1,B4GALT2,WNT4,CA10,PCDH19,GNB4,TMEM108,KIRREL3,PTCHD1,MDGA1,CCDC85C,NANOS1,AMIGO2,DRAXIN,GABRB1,SCN1B
7_Member	GO Biological Processes	GO:0007420	brain development	-6.46834	-3.5239	26/710	493,869,1063,1767,2523,2558,6585,6586,6751,6752,7301,7476,8321,8704,54361,56934,57526,59345,66000,84623,139411,266727,317762,340719,347902,374946	ATP2B4,CBLN1,CENPF,DNAH5,FUT1,GABRA5,SLIT1,SLIT3,SSTR1,SSTR2,TYRO3,WNT7A,FZD1,B4GALT2,WNT4,CA10,PCDH19,GNB4,TMEM108,KIRREL3,PTCHD1,MDGA1,CCDC85C,NANOS1,AMIGO2,DRAXIN
7_Member	GO Biological Processes	GO:0060322	head development	-6.01086	-3.15659	26/751	493,869,1063,1767,2523,2558,6585,6586,6751,6752,7301,7476,8321,8704,54361,56934,57526,59345,66000,84623,139411,266727,317762,340719,347902,374946	ATP2B4,CBLN1,CENPF,DNAH5,FUT1,GABRA5,SLIT1,SLIT3,SSTR1,SSTR2,TYRO3,WNT7A,FZD1,B4GALT2,WNT4,CA10,PCDH19,GNB4,TMEM108,KIRREL3,PTCHD1,MDGA1,CCDC85C,NANOS1,AMIGO2,DRAXIN
7_Member	GO Biological Processes	GO:0030900	forebrain development	-4.62563	-2.06109	15/358	493,1767,2523,6585,6586,6751,6752,7301,7476,54361,66000,84623,139411,317762,374946	ATP2B4,DNAH5,FUT1,SLIT1,SLIT3,SSTR1,SSTR2,TYRO3,WNT7A,WNT4,TMEM108,KIRREL3,PTCHD1,CCDC85C,DRAXIN
7_Member	GO Biological Processes	GO:0021953	central nervous system neuron differentiation	-4.26196	-1.81011	10/180	869,2560,6324,6585,6586,7476,8321,266727,340719,374946	CBLN1,GABRB1,SCN1B,SLIT1,SLIT3,WNT7A,FZD1,MDGA1,NANOS1,DRAXIN
7_Member	GO Biological Processes	GO:0021954	central nervous system neuron development	-3.36572	-1.20496	6/83	2560,6324,6585,6586,340719,374946	GABRB1,SCN1B,SLIT1,SLIT3,NANOS1,DRAXIN
7_Member	GO Biological Processes	GO:0021537	telencephalon development	-2.75167	-0.800876	9/233	493,1767,2523,6585,6586,66000,84623,317762,374946	ATP2B4,DNAH5,FUT1,SLIT1,SLIT3,TMEM108,KIRREL3,CCDC85C,DRAXIN
7_Member	GO Biological Processes	GO:0021772	olfactory bulb development	-2.38002	-0.56065	3/28	2523,6585,6586	FUT1,SLIT1,SLIT3
7_Member	GO Biological Processes	GO:0021988	olfactory lobe development	-2.2943	-0.519766	3/30	2523,6585,6586	FUT1,SLIT1,SLIT3
8_Summary	WikiPathways	WP289	Myometrial Relaxation and Contraction Pathways	-6.42009	-3.49204	12/158	113,133,817,2786,2981,3488,3725,5569,5570,5580,54331,59345,147,4792,2289,2911,4988,5330,7421,83982,3269,5734,22883,493,5644,5645,5646,4878,5138,6324,7170,6543,340719	ADCY7,ADM,CAMK2D,GNG4,GUCA2B,IGFBP5,JUN,PKIA,PKIB,PRKCD,GNG2,GNB4,ADRA1B,NFKBIA,FKBP5,GRM1,OPRM1,PLCB2,VDR,IFI27L2,HRH1,PTGER4,CLSTN1,ATP2B4,PRSS1,PRSS2,PRSS3,NPPA,PDE2A,SCN1B,TPM3,SLC8A2,NANOS1
8_Member	WikiPathways	WP289	Myometrial Relaxation and Contraction Pathways	-6.42009	-3.49204	12/158	113,133,817,2786,2981,3488,3725,5569,5570,5580,54331,59345	ADCY7,ADM,CAMK2D,GNG4,GUCA2B,IGFBP5,JUN,PKIA,PKIB,PRKCD,GNG2,GNB4
8_Member	WikiPathways	WP536	Calcium Regulation in the Cardiac Cell	-4.10249	-1.68259	9/152	113,147,817,2786,5569,5570,5580,54331,59345	ADCY7,ADRA1B,CAMK2D,GNG4,PKIA,PKIB,PRKCD,GNG2,GNB4
8_Member	Canonical Pathways	M15	PID LYSOPHOSPHOLIPID PATHWAY	-3.94936	-1.56766	6/65	113,147,3725,4792,5580,54331	ADCY7,ADRA1B,JUN,NFKBIA,PRKCD,GNG2
8_Member	KEGG Pathway	ko04915	Estrogen signaling pathway	-3.80889	-1.49869	7/98	113,2289,2911,3725,4988,5330,5580	ADCY7,FKBP5,GRM1,JUN,OPRM1,PLCB2,PRKCD
8_Member	WikiPathways	WP4341	Non-genomic actions of 1,25 dihydroxyvitamin D3	-3.73578	-1.44824	6/71	817,3725,5330,5580,7421,83982	CAMK2D,JUN,PLCB2,PRKCD,VDR,IFI27L2
8_Member	KEGG Pathway	hsa04750	inflammatory mediator regulation of trp channels	-3.64848	-1.37542	7/104	113,817,3269,5330,5580,5734,22883	ADCY7,CAMK2D,HRH1,PLCB2,PRKCD,PTGER4,CLSTN1
8_Member	KEGG Pathway	hsa04915	Estrogen signaling pathway	-3.478	-1.29187	8/146	113,2289,2911,3725,4988,5330,5580,22883	ADCY7,FKBP5,GRM1,JUN,OPRM1,PLCB2,PRKCD,CLSTN1
8_Member	KEGG Pathway	ko04972	Pancreatic secretion	-3.03037	-0.971979	6/96	113,493,5330,5644,5645,5646	ADCY7,ATP2B4,PLCB2,PRSS1,PRSS2,PRSS3
8_Member	KEGG Pathway	hsa04925	aldosterone synthesis and secretion	-2.89353	-0.888218	6/102	113,493,817,4878,5138,5330	ADCY7,ATP2B4,CAMK2D,NPPA,PDE2A,PLCB2
8_Member	KEGG Pathway	hsa04972	Pancreatic secretion	-2.87167	-0.87961	6/103	113,493,5330,5644,5645,5646	ADCY7,ATP2B4,PLCB2,PRSS1,PRSS2,PRSS3
8_Member	KEGG Pathway	ko04261	Adrenergic signaling in cardiomyocytes	-2.80559	-0.835668	7/144	113,147,493,817,5330,6324,7170	ADCY7,ADRA1B,ATP2B4,CAMK2D,PLCB2,SCN1B,TPM3
8_Member	KEGG Pathway	hsa04261	Adrenergic signaling in cardiomyocytes	-2.75441	-0.801529	7/147	113,147,493,817,5330,6324,7170	ADCY7,ADRA1B,ATP2B4,CAMK2D,PLCB2,SCN1B,TPM3
8_Member	Reactome Gene Sets	R-HSA-112043	PLC beta mediated events	-2.52769	-0.642484	4/51	113,817,5330,5580	ADCY7,CAMK2D,PLCB2,PRKCD
8_Member	Reactome Gene Sets	R-HSA-112040	G-protein mediated events	-2.38021	-0.56065	4/56	113,817,5330,5580	ADCY7,CAMK2D,PLCB2,PRKCD
8_Member	KEGG Pathway	hsa04022	cGMP-PKG signaling pathway	-2.3606	-0.555064	7/173	113,147,493,4878,5138,5330,6543	ADCY7,ADRA1B,ATP2B4,NPPA,PDE2A,PLCB2,SLC8A2
8_Member	KEGG Pathway	hsa04912	GnRH signaling pathway	-2.3436	-0.543939	5/92	113,817,3725,5330,5580	ADCY7,CAMK2D,JUN,PLCB2,PRKCD
8_Member	KEGG Pathway	ko04912	GnRH signaling pathway	-2.3436	-0.543939	5/92	113,817,3725,5330,5580	ADCY7,CAMK2D,JUN,PLCB2,PRKCD
8_Member	KEGG Pathway	hsa04970	Salivary secretion	-2.30403	-0.525538	5/94	113,147,493,5330,340719	ADCY7,ADRA1B,ATP2B4,PLCB2,NANOS1
8_Member	Canonical Pathways	M8	PID ENDOTHELIN PATHWAY	-2.19782	-0.465772	4/63	113,3725,5330,5580	ADCY7,JUN,PLCB2,PRKCD
8_Member	Reactome Gene Sets	R-HSA-111933	Calmodulin induced events	-2.03846	-0.373219	3/37	113,817,5580	ADCY7,CAMK2D,PRKCD
8_Member	Reactome Gene Sets	R-HSA-111997	CaM pathway	-2.03846	-0.373219	3/37	113,817,5580	ADCY7,CAMK2D,PRKCD
9_Summary	GO Biological Processes	GO:0071407	cellular response to organic cyclic compound	-6.07814	-3.21008	22/558	366,493,1816,2560,3269,3350,3354,3363,3488,4988,5138,5176,5467,6751,6752,7421,8013,8805,54331,55885,84830,114907,147,133,4878,6543,23576,59342,817,1268,5125,6324,6445,55800,113,2742,2888,5580,5786,55022,4703,7476,10451,79822,374946	AQP9,ATP2B4,DRD5,GABRB1,HRH1,HTR1A,HTR1E,HTR7,IGFBP5,OPRM1,PDE2A,SERPINF1,PPARD,SSTR1,SSTR2,VDR,NR4A3,TRIM24,GNG2,LMO3,ADTRP,FBXO32,ADRA1B,ADM,NPPA,SLC8A2,DDAH1,SCPEP1,CAMK2D,CNR1,PCSK5,SCN1B,SGCG,SCN3B,ADCY7,GLRA2,GRB14,PRKCD,PTPRA,PID1,NEB,WNT7A,VAV3,ARHGAP28,DRAXIN
9_Member	GO Biological Processes	GO:0071407	cellular response to organic cyclic compound	-6.07814	-3.21008	22/558	366,493,1816,2560,3269,3350,3354,3363,3488,4988,5138,5176,5467,6751,6752,7421,8013,8805,54331,55885,84830,114907	AQP9,ATP2B4,DRD5,GABRB1,HRH1,HTR1A,HTR1E,HTR7,IGFBP5,OPRM1,PDE2A,SERPINF1,PPARD,SSTR1,SSTR2,VDR,NR4A3,TRIM24,GNG2,LMO3,ADTRP,FBXO32
9_Member	WikiPathways	WP58	Monoamine GPCRs	-5.68572	-2.90608	6/33	147,1816,3269,3350,3354,3363	ADRA1B,DRD5,HRH1,HTR1A,HTR1E,HTR7
9_Member	Reactome Gene Sets	R-HSA-375280	Amine ligand-binding receptors	-5.04868	-2.35542	6/42	147,1816,3269,3350,3354,3363	ADRA1B,DRD5,HRH1,HTR1A,HTR1E,HTR7
9_Member	GO Biological Processes	GO:0071868	cellular response to monoamine stimulus	-4.50825	-1.9749	8/104	493,1816,3269,3350,3354,3363,8013,54331	ATP2B4,DRD5,HRH1,HTR1A,HTR1E,HTR7,NR4A3,GNG2
9_Member	GO Biological Processes	GO:0071870	cellular response to catecholamine stimulus	-4.50825	-1.9749	8/104	493,1816,3269,3350,3354,3363,8013,54331	ATP2B4,DRD5,HRH1,HTR1A,HTR1E,HTR7,NR4A3,GNG2
9_Member	GO Biological Processes	GO:0003018	vascular process in circulatory system	-4.45874	-1.93817	12/245	133,147,493,1816,3269,3350,3363,4878,5138,6543,23576,59342	ADM,ADRA1B,ATP2B4,DRD5,HRH1,HTR1A,HTR7,NPPA,PDE2A,SLC8A2,DDAH1,SCPEP1
9_Member	GO Biological Processes	GO:0071867	response to monoamine	-4.39008	-1.89399	8/108	493,1816,3269,3350,3354,3363,8013,54331	ATP2B4,DRD5,HRH1,HTR1A,HTR1E,HTR7,NR4A3,GNG2
9_Member	GO Biological Processes	GO:0071869	response to catecholamine	-4.39008	-1.89399	8/108	493,1816,3269,3350,3354,3363,8013,54331	ATP2B4,DRD5,HRH1,HTR1A,HTR1E,HTR7,NR4A3,GNG2
9_Member	GO Biological Processes	GO:0008015	blood circulation	-4.24355	-1.79794	18/528	133,147,493,817,1268,1816,3269,3350,3363,4878,5125,5138,6324,6445,6543,23576,55800,59342	ADM,ADRA1B,ATP2B4,CAMK2D,CNR1,DRD5,HRH1,HTR1A,HTR7,NPPA,PCSK5,PDE2A,SCN1B,SGCG,SLC8A2,DDAH1,SCN3B,SCPEP1
9_Member	GO Biological Processes	GO:0035296	regulation of tube diameter	-3.89249	-1.54385	8/127	133,147,1816,3269,3350,3363,4878,59342	ADM,ADRA1B,DRD5,HRH1,HTR1A,HTR7,NPPA,SCPEP1
9_Member	GO Biological Processes	GO:0097746	blood vessel diameter maintenance	-3.89249	-1.54385	8/127	133,147,1816,3269,3350,3363,4878,59342	ADM,ADRA1B,DRD5,HRH1,HTR1A,HTR7,NPPA,SCPEP1
9_Member	GO Biological Processes	GO:0035150	regulation of tube size	-3.86883	-1.52644	8/128	133,147,1816,3269,3350,3363,4878,59342	ADM,ADRA1B,DRD5,HRH1,HTR1A,HTR7,NPPA,SCPEP1
9_Member	GO Biological Processes	GO:0071417	cellular response to organonitrogen compound	-3.59892	-1.35986	19/648	113,366,493,1816,2560,2742,2888,3269,3350,3354,3363,3488,4988,5138,5580,5786,8013,54331,55022	ADCY7,AQP9,ATP2B4,DRD5,GABRB1,GLRA2,GRB14,HRH1,HTR1A,HTR1E,HTR7,IGFBP5,OPRM1,PDE2A,PRKCD,PTPRA,NR4A3,GNG2,PID1
9_Member	Reactome Gene Sets	R-HSA-390666	Serotonin receptors	-3.49291	-1.30081	3/12	3350,3354,3363	HTR1A,HTR1E,HTR7
9_Member	GO Biological Processes	GO:0042310	vasoconstriction	-3.48167	-1.29252	6/79	133,147,1816,3269,3350,3363	ADM,ADRA1B,DRD5,HRH1,HTR1A,HTR7
9_Member	GO Biological Processes	GO:0003013	circulatory system process	-3.46257	-1.28213	18/611	133,147,493,817,1268,1816,3269,3350,3363,4878,5125,5138,6324,6445,6543,23576,55800,59342	ADM,ADRA1B,ATP2B4,CAMK2D,CNR1,DRD5,HRH1,HTR1A,HTR7,NPPA,PCSK5,PDE2A,SCN1B,SGCG,SLC8A2,DDAH1,SCN3B,SCPEP1
9_Member	GO Biological Processes	GO:1903351	cellular response to dopamine	-3.20368	-1.09953	6/89	1816,3269,3350,3354,3363,54331	DRD5,HRH1,HTR1A,HTR1E,HTR7,GNG2
9_Member	GO Biological Processes	GO:0098664	G protein-coupled serotonin receptor signaling pathway	-3.19165	-1.08991	4/34	3269,3350,3354,3363	HRH1,HTR1A,HTR1E,HTR7
9_Member	GO Biological Processes	GO:0003073	regulation of systemic arterial blood pressure	-3.17794	-1.08334	6/90	133,147,1816,4878,5125,23576	ADM,ADRA1B,DRD5,NPPA,PCSK5,DDAH1
9_Member	GO Biological Processes	GO:1903350	response to dopamine	-3.17794	-1.08334	6/90	1816,3269,3350,3354,3363,54331	DRD5,HRH1,HTR1A,HTR1E,HTR7,GNG2
9_Member	GO Biological Processes	GO:1901699	cellular response to nitrogen compound	-3.16796	-1.07571	19/703	113,366,493,1816,2560,2742,2888,3269,3350,3354,3363,3488,4988,5138,5580,5786,8013,54331,55022	ADCY7,AQP9,ATP2B4,DRD5,GABRB1,GLRA2,GRB14,HRH1,HTR1A,HTR1E,HTR7,IGFBP5,OPRM1,PDE2A,PRKCD,PTPRA,NR4A3,GNG2,PID1
9_Member	GO Biological Processes	GO:0007210	serotonin receptor signaling pathway	-2.9627	-0.925506	4/39	3269,3350,3354,3363	HRH1,HTR1A,HTR1E,HTR7
9_Member	GO Biological Processes	GO:0008217	regulation of blood pressure	-2.92869	-0.906476	8/177	133,147,1268,1816,4878,5125,23576,59342	ADM,ADRA1B,CNR1,DRD5,NPPA,PCSK5,DDAH1,SCPEP1
9_Member	GO Biological Processes	GO:0045776	negative regulation of blood pressure	-2.92092	-0.906476	4/40	1268,1816,4878,59342	CNR1,DRD5,NPPA,SCPEP1
9_Member	GO Biological Processes	GO:0090066	regulation of anatomical structure size	-2.65907	-0.73345	14/494	133,147,1816,3269,3350,3363,4703,4878,5580,7476,10451,59342,79822,374946	ADM,ADRA1B,DRD5,HRH1,HTR1A,HTR7,NEB,NPPA,PRKCD,WNT7A,VAV3,SCPEP1,ARHGAP28,DRAXIN
9_Member	GO Biological Processes	GO:0019229	regulation of vasoconstriction	-2.2474	-0.489222	4/61	133,147,3269,3350	ADM,ADRA1B,HRH1,HTR1A
10_Summary	KEGG Pathway	hsa04310	Wnt signaling pathway	-5.12585	-2.40463	10/143	817,2239,3725,5176,5330,5467,7476,8321,10023,54361,869,1501,2742,2898,4988,6543,6804,8001,22881,51339,54331,55959,56853,66000,374946,113,330,2786,4792,5733,5734,7170,59345,5580,163183	CAMK2D,GPC4,JUN,SERPINF1,PLCB2,PPARD,WNT7A,FZD1,FRAT1,WNT4,CBLN1,CTNND2,GLRA2,GRIK2,OPRM1,SLC8A2,STX1A,GLRA3,ANKRD6,DACT1,GNG2,SULF2,CELF4,TMEM108,DRAXIN,ADCY7,BIRC3,GNG4,NFKBIA,PTGER3,PTGER4,TPM3,GNB4,PRKCD,SYNE4
10_Member	KEGG Pathway	hsa04310	Wnt signaling pathway	-5.12585	-2.40463	10/143	817,2239,3725,5176,5330,5467,7476,8321,10023,54361	CAMK2D,GPC4,JUN,SERPINF1,PLCB2,PPARD,WNT7A,FZD1,FRAT1,WNT4
10_Member	KEGG Pathway	ko04310	Wnt signaling pathway	-5.12585	-2.40463	10/143	817,2239,3725,5176,5330,5467,7476,8321,10023,54361	CAMK2D,GPC4,JUN,SERPINF1,PLCB2,PPARD,WNT7A,FZD1,FRAT1,WNT4
10_Member	WikiPathways	WP428	Wnt Signaling	-4.97288	-2.3358	9/118	817,2239,3725,5176,5330,7476,8321,10023,54361	CAMK2D,GPC4,JUN,SERPINF1,PLCB2,WNT7A,FZD1,FRAT1,WNT4
10_Member	GO Biological Processes	GO:1905114	cell surface receptor signaling pathway involved in cell-cell signaling	-4.87923	-2.29066	21/614	869,1501,2239,2742,2898,4988,5330,6543,6804,7476,8001,8321,10023,22881,51339,54331,54361,55959,56853,66000,374946	CBLN1,CTNND2,GPC4,GLRA2,GRIK2,OPRM1,PLCB2,SLC8A2,STX1A,WNT7A,GLRA3,FZD1,FRAT1,ANKRD6,DACT1,GNG2,WNT4,SULF2,CELF4,TMEM108,DRAXIN
10_Member	KEGG Pathway	hsa05200	Pathways in cancer	-4.14043	-1.71043	15/395	113,330,2786,3725,4792,5330,5467,5733,5734,7170,7476,8321,54331,54361,59345	ADCY7,BIRC3,GNG4,JUN,NFKBIA,PLCB2,PPARD,PTGER3,PTGER4,TPM3,WNT7A,FZD1,GNG2,WNT4,GNB4
10_Member	WikiPathways	WP399	Wnt Signaling Pathway and Pluripotency	-3.57238	-1.35598	7/107	3725,5467,5580,7476,8321,10023,54361	JUN,PPARD,PRKCD,WNT7A,FZD1,FRAT1,WNT4
10_Member	GO Biological Processes	GO:0035567	non-canonical Wnt signaling pathway	-3.34182	-1.19725	8/153	2239,5330,7476,8321,22881,51339,54331,54361	GPC4,PLCB2,WNT7A,FZD1,ANKRD6,DACT1,GNG2,WNT4
10_Member	WikiPathways	WP4336	ncRNAs involved in Wnt signaling in hepatocellular carcinoma	-3.15254	-1.06263	6/91	3725,5176,7476,8321,10023,54361	JUN,SERPINF1,WNT7A,FZD1,FRAT1,WNT4
10_Member	KEGG Pathway	hsa04916	Melanogenesis	-2.91565	-0.906476	6/101	113,817,5330,7476,8321,54361	ADCY7,CAMK2D,PLCB2,WNT7A,FZD1,WNT4
10_Member	KEGG Pathway	ko04916	Melanogenesis	-2.91565	-0.906476	6/101	113,817,5330,7476,8321,54361	ADCY7,CAMK2D,PLCB2,WNT7A,FZD1,WNT4
10_Member	WikiPathways	WP4258	LncRNA involvement in canonical Wnt signaling and colorectal cancer	-2.85007	-0.861724	6/104	3725,5176,7476,8321,10023,54361	JUN,SERPINF1,WNT7A,FZD1,FRAT1,WNT4
10_Member	Canonical Pathways	M70	PID PS1 PATHWAY	-2.69296	-0.760057	4/46	3725,5467,8321,10023	JUN,PPARD,FZD1,FRAT1
10_Member	Canonical Pathways	M5493	WNT SIGNALING	-2.40497	-0.574472	5/89	3725,7476,8321,10023,54361	JUN,WNT7A,FZD1,FRAT1,WNT4
10_Member	GO Biological Processes	GO:0001738	morphogenesis of a polarized epithelium	-2.12348	-0.423026	6/146	2239,7476,8321,22881,51339,163183	GPC4,WNT7A,FZD1,ANKRD6,DACT1,SYNE4
10_Member	GO Biological Processes	GO:0198738	cell-cell signaling by wnt	-2.09593	-0.406567	13/515	1501,2239,4988,5330,7476,8321,10023,22881,51339,54331,54361,55959,374946	CTNND2,GPC4,OPRM1,PLCB2,WNT7A,FZD1,FRAT1,ANKRD6,DACT1,GNG2,WNT4,SULF2,DRAXIN
10_Member	GO Biological Processes	GO:0060071	Wnt signaling pathway, planar cell polarity pathway	-2.05342	-0.382418	5/108	2239,7476,8321,22881,51339	GPC4,WNT7A,FZD1,ANKRD6,DACT1
11_Summary	KEGG Pathway	hsa04020	Calcium signaling pathway	-4.97379	-2.3358	11/182	113,147,493,817,1816,2911,3269,3363,5330,5733,6543,133,793,1268,2898,5734,7781,8805,10590,56477,4988,5172,6324,55800	ADCY7,ADRA1B,ATP2B4,CAMK2D,DRD5,GRM1,HRH1,HTR7,PLCB2,PTGER3,SLC8A2,ADM,CALB1,CNR1,GRIK2,PTGER4,SLC30A3,TRIM24,SCGN,CCL28,OPRM1,SLC26A4,SCN1B,SCN3B
11_Member	KEGG Pathway	hsa04020	Calcium signaling pathway	-4.97379	-2.3358	11/182	113,147,493,817,1816,2911,3269,3363,5330,5733,6543	ADCY7,ADRA1B,ATP2B4,CAMK2D,DRD5,GRM1,HRH1,HTR7,PLCB2,PTGER3,SLC8A2
11_Member	KEGG Pathway	ko04020	Calcium signaling pathway	-4.97379	-2.3358	11/182	113,147,493,817,1816,2911,3269,3363,5330,5733,6543	ADCY7,ADRA1B,ATP2B4,CAMK2D,DRD5,GRM1,HRH1,HTR7,PLCB2,PTGER3,SLC8A2
11_Member	GO Biological Processes	GO:0072507	divalent inorganic cation homeostasis	-3.52636	-1.31616	16/500	133,147,493,793,817,1268,1816,2898,2911,5733,5734,6543,7781,8805,10590,56477	ADM,ADRA1B,ATP2B4,CALB1,CAMK2D,CNR1,DRD5,GRIK2,GRM1,PTGER3,PTGER4,SLC8A2,SLC30A3,TRIM24,SCGN,CCL28
11_Member	GO Biological Processes	GO:0055074	calcium ion homeostasis	-3.4752	-1.29187	15/455	133,147,493,793,817,1268,1816,2898,2911,5733,5734,6543,8805,10590,56477	ADM,ADRA1B,ATP2B4,CALB1,CAMK2D,CNR1,DRD5,GRIK2,GRM1,PTGER3,PTGER4,SLC8A2,TRIM24,SCGN,CCL28
11_Member	GO Biological Processes	GO:0072503	cellular divalent inorganic cation homeostasis	-3.22513	-1.11613	15/481	133,147,493,793,817,1268,1816,2898,2911,5733,5734,6543,7781,10590,56477	ADM,ADRA1B,ATP2B4,CALB1,CAMK2D,CNR1,DRD5,GRIK2,GRM1,PTGER3,PTGER4,SLC8A2,SLC30A3,SCGN,CCL28
11_Member	GO Biological Processes	GO:0006874	cellular calcium ion homeostasis	-3.10182	-1.01887	14/443	133,147,493,793,817,1268,1816,2898,2911,5733,5734,6543,10590,56477	ADM,ADRA1B,ATP2B4,CALB1,CAMK2D,CNR1,DRD5,GRIK2,GRM1,PTGER3,PTGER4,SLC8A2,SCGN,CCL28
11_Member	GO Biological Processes	GO:0051480	regulation of cytosolic calcium ion concentration	-3.08809	-1.00971	12/345	133,147,493,793,817,1268,2911,5733,5734,6543,10590,56477	ADM,ADRA1B,ATP2B4,CALB1,CAMK2D,CNR1,GRM1,PTGER3,PTGER4,SLC8A2,SCGN,CCL28
11_Member	GO Biological Processes	GO:0007200	phospholipase C-activating G protein-coupled receptor signaling pathway	-2.87167	-0.87961	6/103	147,1816,2911,3269,4988,5733	ADRA1B,DRD5,GRM1,HRH1,OPRM1,PTGER3
11_Member	GO Biological Processes	GO:0050801	ion homeostasis	-2.60686	-0.696194	19/787	133,147,493,793,817,1268,1816,2898,2911,5172,5733,5734,6324,6543,7781,8805,10590,55800,56477	ADM,ADRA1B,ATP2B4,CALB1,CAMK2D,CNR1,DRD5,GRIK2,GRM1,SLC26A4,PTGER3,PTGER4,SCN1B,SLC8A2,SLC30A3,TRIM24,SCGN,SCN3B,CCL28
11_Member	GO Biological Processes	GO:0006875	cellular metal ion homeostasis	-2.46305	-0.610135	15/576	133,147,493,793,817,1268,1816,2898,2911,5733,5734,6543,7781,10590,56477	ADM,ADRA1B,ATP2B4,CALB1,CAMK2D,CNR1,DRD5,GRIK2,GRM1,PTGER3,PTGER4,SLC8A2,SLC30A3,SCGN,CCL28
11_Member	GO Biological Processes	GO:0007204	positive regulation of cytosolic calcium ion concentration	-2.42869	-0.587225	10/310	133,147,493,817,1268,2911,5733,5734,6543,56477	ADM,ADRA1B,ATP2B4,CAMK2D,CNR1,GRM1,PTGER3,PTGER4,SLC8A2,CCL28
11_Member	GO Biological Processes	GO:0055065	metal ion homeostasis	-2.36919	-0.556313	16/648	133,147,493,793,817,1268,1816,2898,2911,5733,5734,6543,7781,8805,10590,56477	ADM,ADRA1B,ATP2B4,CALB1,CAMK2D,CNR1,DRD5,GRIK2,GRM1,PTGER3,PTGER4,SLC8A2,SLC30A3,TRIM24,SCGN,CCL28
11_Member	GO Biological Processes	GO:0055080	cation homeostasis	-2.23492	-0.486165	17/730	133,147,493,793,817,1268,1816,2898,2911,5172,5733,5734,6543,7781,8805,10590,56477	ADM,ADRA1B,ATP2B4,CALB1,CAMK2D,CNR1,DRD5,GRIK2,GRM1,SLC26A4,PTGER3,PTGER4,SLC8A2,SLC30A3,TRIM24,SCGN,CCL28
11_Member	GO Biological Processes	GO:0098771	inorganic ion homeostasis	-2.17845	-0.457204	17/740	133,147,493,793,817,1268,1816,2898,2911,5172,5733,5734,6543,7781,8805,10590,56477	ADM,ADRA1B,ATP2B4,CALB1,CAMK2D,CNR1,DRD5,GRIK2,GRM1,SLC26A4,PTGER3,PTGER4,SLC8A2,SLC30A3,TRIM24,SCGN,CCL28
12_Summary	KEGG Pathway	ko04974	Protein digestion and absorption	-4.96841	-2.3358	8/90	1300,1301,1305,5644,5645,5646,6543,643834,2,5650,5212,9508,55790,55959,84830	COL10A1,COL11A1,COL13A1,PRSS1,PRSS2,PRSS3,SLC8A2,PGA3,A2M,KLK7,VIT,ADAMTS3,CSGALNACT1,SULF2,ADTRP
12_Member	KEGG Pathway	ko04974	Protein digestion and absorption	-4.96841	-2.3358	8/90	1300,1301,1305,5644,5645,5646,6543,643834	COL10A1,COL11A1,COL13A1,PRSS1,PRSS2,PRSS3,SLC8A2,PGA3
12_Member	KEGG Pathway	hsa04974	Protein digestion and absorption	-4.82879	-2.24752	8/94	1300,1301,1305,5644,5645,5646,6543,643834	COL10A1,COL11A1,COL13A1,PRSS1,PRSS2,PRSS3,SLC8A2,PGA3
12_Member	Reactome Gene Sets	R-HSA-1474228	Degradation of the extracellular matrix	-2.87599	-0.87961	7/140	2,1300,1301,1305,5644,5645,5650	A2M,COL10A1,COL11A1,COL13A1,PRSS1,PRSS2,KLK7
12_Member	GO Biological Processes	GO:0030198	extracellular matrix organization	-2.59488	-0.688777	12/395	2,1300,1301,1305,5212,5644,5645,5650,9508,55790,55959,84830	A2M,COL10A1,COL11A1,COL13A1,VIT,PRSS1,PRSS2,KLK7,ADAMTS3,CSGALNACT1,SULF2,ADTRP
12_Member	GO Biological Processes	GO:0043062	extracellular structure organization	-2.58596	-0.681388	12/396	2,1300,1301,1305,5212,5644,5645,5650,9508,55790,55959,84830	A2M,COL10A1,COL11A1,COL13A1,VIT,PRSS1,PRSS2,KLK7,ADAMTS3,CSGALNACT1,SULF2,ADTRP
12_Member	GO Biological Processes	GO:0045229	external encapsulating structure organization	-2.56823	-0.671211	12/398	2,1300,1301,1305,5212,5644,5645,5650,9508,55790,55959,84830	A2M,COL10A1,COL11A1,COL13A1,VIT,PRSS1,PRSS2,KLK7,ADAMTS3,CSGALNACT1,SULF2,ADTRP
12_Member	Reactome Gene Sets	R-HSA-1442490	Collagen degradation	-2.17373	-0.456356	4/64	1300,1301,1305,5645	COL10A1,COL11A1,COL13A1,PRSS2
12_Member	Reactome Gene Sets	R-HSA-1650814	Collagen biosynthesis and modifying enzymes	-2.10406	-0.411604	4/67	1300,1301,1305,9508	COL10A1,COL11A1,COL13A1,ADAMTS3
13_Summary	GO Biological Processes	GO:0007611	learning or memory	-4.63611	-2.06202	12/235	793,1268,1816,2558,3269,3725,4885,5176,6543,8704,10882,139411,2898,2911,3350,4988,8013,27253,84623	CALB1,CNR1,DRD5,GABRA5,HRH1,JUN,NPTX2,SERPINF1,SLC8A2,B4GALT2,C1QL1,PTCHD1,GRIK2,GRM1,HTR1A,OPRM1,NR4A3,PCDH17,KIRREL3
13_Member	GO Biological Processes	GO:0007611	learning or memory	-4.63611	-2.06202	12/235	793,1268,1816,2558,3269,3725,4885,5176,6543,8704,10882,139411	CALB1,CNR1,DRD5,GABRA5,HRH1,JUN,NPTX2,SERPINF1,SLC8A2,B4GALT2,C1QL1,PTCHD1
13_Member	GO Biological Processes	GO:0007610	behavior	-4.60149	-2.04825	19/543	793,1268,1816,2558,2898,2911,3269,3350,3725,4885,4988,5176,6543,8013,8704,10882,27253,84623,139411	CALB1,CNR1,DRD5,GABRA5,GRIK2,GRM1,HRH1,HTR1A,JUN,NPTX2,OPRM1,SERPINF1,SLC8A2,NR4A3,B4GALT2,C1QL1,PCDH17,KIRREL3,PTCHD1
13_Member	GO Biological Processes	GO:0007614	short-term memory	-4.07205	-1.66688	3/8	793,5176,139411	CALB1,SERPINF1,PTCHD1
13_Member	GO Biological Processes	GO:0050890	cognition	-3.96347	-1.57254	12/276	793,1268,1816,2558,3269,3725,4885,5176,6543,8704,10882,139411	CALB1,CNR1,DRD5,GABRA5,HRH1,JUN,NPTX2,SERPINF1,SLC8A2,B4GALT2,C1QL1,PTCHD1
13_Member	GO Biological Processes	GO:0007612	learning	-3.82217	-1.50018	8/130	1816,2558,3269,3725,4885,6543,8704,10882	DRD5,GABRA5,HRH1,JUN,NPTX2,SLC8A2,B4GALT2,C1QL1
13_Member	GO Biological Processes	GO:0007613	memory	-3.57238	-1.35598	7/107	793,1268,3269,5176,6543,8704,139411	CALB1,CNR1,HRH1,SERPINF1,SLC8A2,B4GALT2,PTCHD1
13_Member	GO Biological Processes	GO:0008306	associative learning	-2.91891	-0.906476	5/68	1816,2558,3269,4885,8704	DRD5,GABRA5,HRH1,NPTX2,B4GALT2
14_Summary	GO Biological Processes	GO:0070050	neuron cellular homeostasis	-4.41685	-1.90253	5/33	793,1268,6543,7301,10590,2911,2898,6804,22883	CALB1,CNR1,SLC8A2,TYRO3,SCGN,GRM1,GRIK2,STX1A,CLSTN1
14_Member	GO Biological Processes	GO:0070050	neuron cellular homeostasis	-4.41685	-1.90253	5/33	793,1268,6543,7301,10590	CALB1,CNR1,SLC8A2,TYRO3,SCGN
14_Member	GO Biological Processes	GO:0099566	regulation of postsynaptic cytosolic calcium ion concentration	-3.61408	-1.36018	3/11	793,2911,6543	CALB1,GRM1,SLC8A2
14_Member	GO Biological Processes	GO:0099509	regulation of presynaptic cytosolic calcium ion concentration	-3.10221	-1.01887	3/16	793,1268,10590	CALB1,CNR1,SCGN
14_Member	GO Biological Processes	GO:0050806	positive regulation of synaptic transmission	-2.80559	-0.835668	7/144	793,1268,2898,6543,6804,10590,22883	CALB1,CNR1,GRIK2,SLC8A2,STX1A,SCGN,CLSTN1
15_Summary	GO Biological Processes	GO:0072001	renal system development	-4.39782	-1.89399	13/289	793,1063,1592,2650,5125,5176,5950,6664,9244,54361,55959,84623,203286	CALB1,CENPF,CYP26A1,GCNT1,PCSK5,SERPINF1,RBP4,SOX11,CRLF1,WNT4,SULF2,KIRREL3,ANKS6
15_Member	GO Biological Processes	GO:0072001	renal system development	-4.39782	-1.89399	13/289	793,1063,1592,2650,5125,5176,5950,6664,9244,54361,55959,84623,203286	CALB1,CENPF,CYP26A1,GCNT1,PCSK5,SERPINF1,RBP4,SOX11,CRLF1,WNT4,SULF2,KIRREL3,ANKS6
15_Member	GO Biological Processes	GO:0001655	urogenital system development	-3.93711	-1.56374	13/321	793,1063,1592,2650,5125,5176,5950,6664,9244,54361,55959,84623,203286	CALB1,CENPF,CYP26A1,GCNT1,PCSK5,SERPINF1,RBP4,SOX11,CRLF1,WNT4,SULF2,KIRREL3,ANKS6
15_Member	GO Biological Processes	GO:0001822	kidney development	-3.89043	-1.54385	12/281	793,1063,1592,2650,5125,5176,6664,9244,54361,55959,84623,203286	CALB1,CENPF,CYP26A1,GCNT1,PCSK5,SERPINF1,SOX11,CRLF1,WNT4,SULF2,KIRREL3,ANKS6
16_Summary	Canonical Pathways	M17761	ST WNT BETA CATENIN PATHWAY	-4.35192	-1.86174	5/34	5786,10023,11167,22881,51339	PTPRA,FRAT1,FSTL1,ANKRD6,DACT1
16_Member	Canonical Pathways	M17761	ST WNT BETA CATENIN PATHWAY	-4.35192	-1.86174	5/34	5786,10023,11167,22881,51339	PTPRA,FRAT1,FSTL1,ANKRD6,DACT1
17_Summary	GO Biological Processes	GO:0007565	female pregnancy	-4.32352	-1.84018	10/177	113,133,1268,3488,4878,5125,5467,7421,54361,130399,1592,3725,4968,4988,6751,6752,8805,56477,92196,5644,5646,10588,330,4792,8013,55885,92610,58495	ADCY7,ADM,CNR1,IGFBP5,NPPA,PCSK5,PPARD,VDR,WNT4,ACVR1C,CYP26A1,JUN,OGG1,OPRM1,SSTR1,SSTR2,TRIM24,CCL28,DAPL1,PRSS1,PRSS3,MTHFS,BIRC3,NFKBIA,NR4A3,LMO3,TIFA,OVOL2
17_Member	GO Biological Processes	GO:0007565	female pregnancy	-4.32352	-1.84018	10/177	113,133,1268,3488,4878,5125,5467,7421,54361,130399	ADCY7,ADM,CNR1,IGFBP5,NPPA,PCSK5,PPARD,VDR,WNT4,ACVR1C
17_Member	GO Biological Processes	GO:0044706	multi-multicellular organism process	-3.81175	-1.49869	10/204	113,133,1268,3488,4878,5125,5467,7421,54361,130399	ADCY7,ADM,CNR1,IGFBP5,NPPA,PCSK5,PPARD,VDR,WNT4,ACVR1C
17_Member	GO Biological Processes	GO:0031667	response to nutrient levels	-3.51554	-1.31194	15/451	133,1268,1592,3725,4968,4988,5467,6751,6752,7421,8805,54361,56477,92196,130399	ADM,CNR1,CYP26A1,JUN,OGG1,OPRM1,PPARD,SSTR1,SSTR2,VDR,TRIM24,WNT4,CCL28,DAPL1,ACVR1C
17_Member	GO Biological Processes	GO:0060135	maternal process involved in female pregnancy	-3.30544	-1.17134	5/56	113,1268,5467,7421,54361	ADCY7,CNR1,PPARD,VDR,WNT4
17_Member	GO Biological Processes	GO:0009991	response to extracellular stimulus	-3.26228	-1.13586	15/477	133,1268,1592,3725,4968,4988,5467,6751,6752,7421,8805,54361,56477,92196,130399	ADM,CNR1,CYP26A1,JUN,OGG1,OPRM1,PPARD,SSTR1,SSTR2,VDR,TRIM24,WNT4,CCL28,DAPL1,ACVR1C
17_Member	GO Biological Processes	GO:0007584	response to nutrient	-2.4731	-0.614561	7/165	1268,1592,4968,5467,7421,8805,56477	CNR1,CYP26A1,OGG1,PPARD,VDR,TRIM24,CCL28
17_Member	GO Biological Processes	GO:0033273	response to vitamin	-2.40497	-0.574472	5/89	1592,4968,5467,7421,8805	CYP26A1,OGG1,PPARD,VDR,TRIM24
17_Member	GO Biological Processes	GO:0006766	vitamin metabolic process	-2.3486	-0.544273	6/131	1592,5467,5644,5646,7421,10588	CYP26A1,PPARD,PRSS1,PRSS3,VDR,MTHFS
17_Member	GO Biological Processes	GO:0030522	intracellular receptor signaling pathway	-2.27646	-0.50638	9/275	330,1592,4792,5467,7421,8013,8805,55885,92610	BIRC3,CYP26A1,NFKBIA,PPARD,VDR,NR4A3,TRIM24,LMO3,TIFA
17_Member	GO Biological Processes	GO:0045684	positive regulation of epidermis development	-2.2148	-0.474479	3/32	5467,7421,58495	PPARD,VDR,OVOL2
17_Member	WikiPathways	WP299	Nuclear Receptors in Lipid Metabolism and Toxicity	-2.10554	-0.411705	3/35	1592,5467,7421	CYP26A1,PPARD,VDR
18_Summary	GO Biological Processes	GO:0016049	cell growth	-4.31878	-1.84018	17/473	817,2786,3488,4856,5467,5645,6585,6586,9362,22883,23251,51760,57699,58189,66000,340719,374946,5950,23180	CAMK2D,GNG4,IGFBP5,CCN3,PPARD,PRSS2,SLIT1,SLIT3,CPNE6,CLSTN1,MINAR1,SYT17,CPNE5,WFDC1,TMEM108,NANOS1,DRAXIN,RBP4,RFTN1
18_Member	GO Biological Processes	GO:0016049	cell growth	-4.31878	-1.84018	17/473	817,2786,3488,4856,5467,5645,6585,6586,9362,22883,23251,51760,57699,58189,66000,340719,374946	CAMK2D,GNG4,IGFBP5,CCN3,PPARD,PRSS2,SLIT1,SLIT3,CPNE6,CLSTN1,MINAR1,SYT17,CPNE5,WFDC1,TMEM108,NANOS1,DRAXIN
18_Member	GO Biological Processes	GO:0001558	regulation of cell growth	-3.97291	-1.57728	15/409	817,2786,3488,4856,5467,5645,6586,9362,22883,23251,51760,57699,58189,340719,374946	CAMK2D,GNG4,IGFBP5,CCN3,PPARD,PRSS2,SLIT3,CPNE6,CLSTN1,MINAR1,SYT17,CPNE5,WFDC1,NANOS1,DRAXIN
18_Member	GO Biological Processes	GO:0040008	regulation of growth	-2.76159	-0.803569	17/647	817,2786,3488,4856,5467,5645,5950,6586,9362,22883,23180,23251,51760,57699,58189,340719,374946	CAMK2D,GNG4,IGFBP5,CCN3,PPARD,PRSS2,RBP4,SLIT3,CPNE6,CLSTN1,RFTN1,MINAR1,SYT17,CPNE5,WFDC1,NANOS1,DRAXIN
18_Member	GO Biological Processes	GO:0045926	negative regulation of growth	-2.60441	-0.696194	9/245	2786,3488,4856,5467,5950,6586,23251,58189,374946	GNG4,IGFBP5,CCN3,PPARD,RBP4,SLIT3,MINAR1,WFDC1,DRAXIN
18_Member	GO Biological Processes	GO:0030308	negative regulation of cell growth	-2.2042	-0.470098	7/185	2786,4856,5467,6586,23251,58189,374946	GNG4,CCN3,PPARD,SLIT3,MINAR1,WFDC1,DRAXIN
[truncated: 20 more rows]

## Sheet: NC  VS. MCI_S (WGCNA)
GroupID	Category	Term	Description	LogP	Log(q-value)	InTerm_InList	Genes	Symbols
[truncated: 290 more rows]

## Sheet: NC  VS. AD (GEO)
GroupID	Category	Term	Description	LogP	Log(q-value)	InTerm_InList	Genes	Symbols
[truncated: 262 more rows]
